# Supplementary material
Source: PubMed Central journal article supplement (PMC556006)

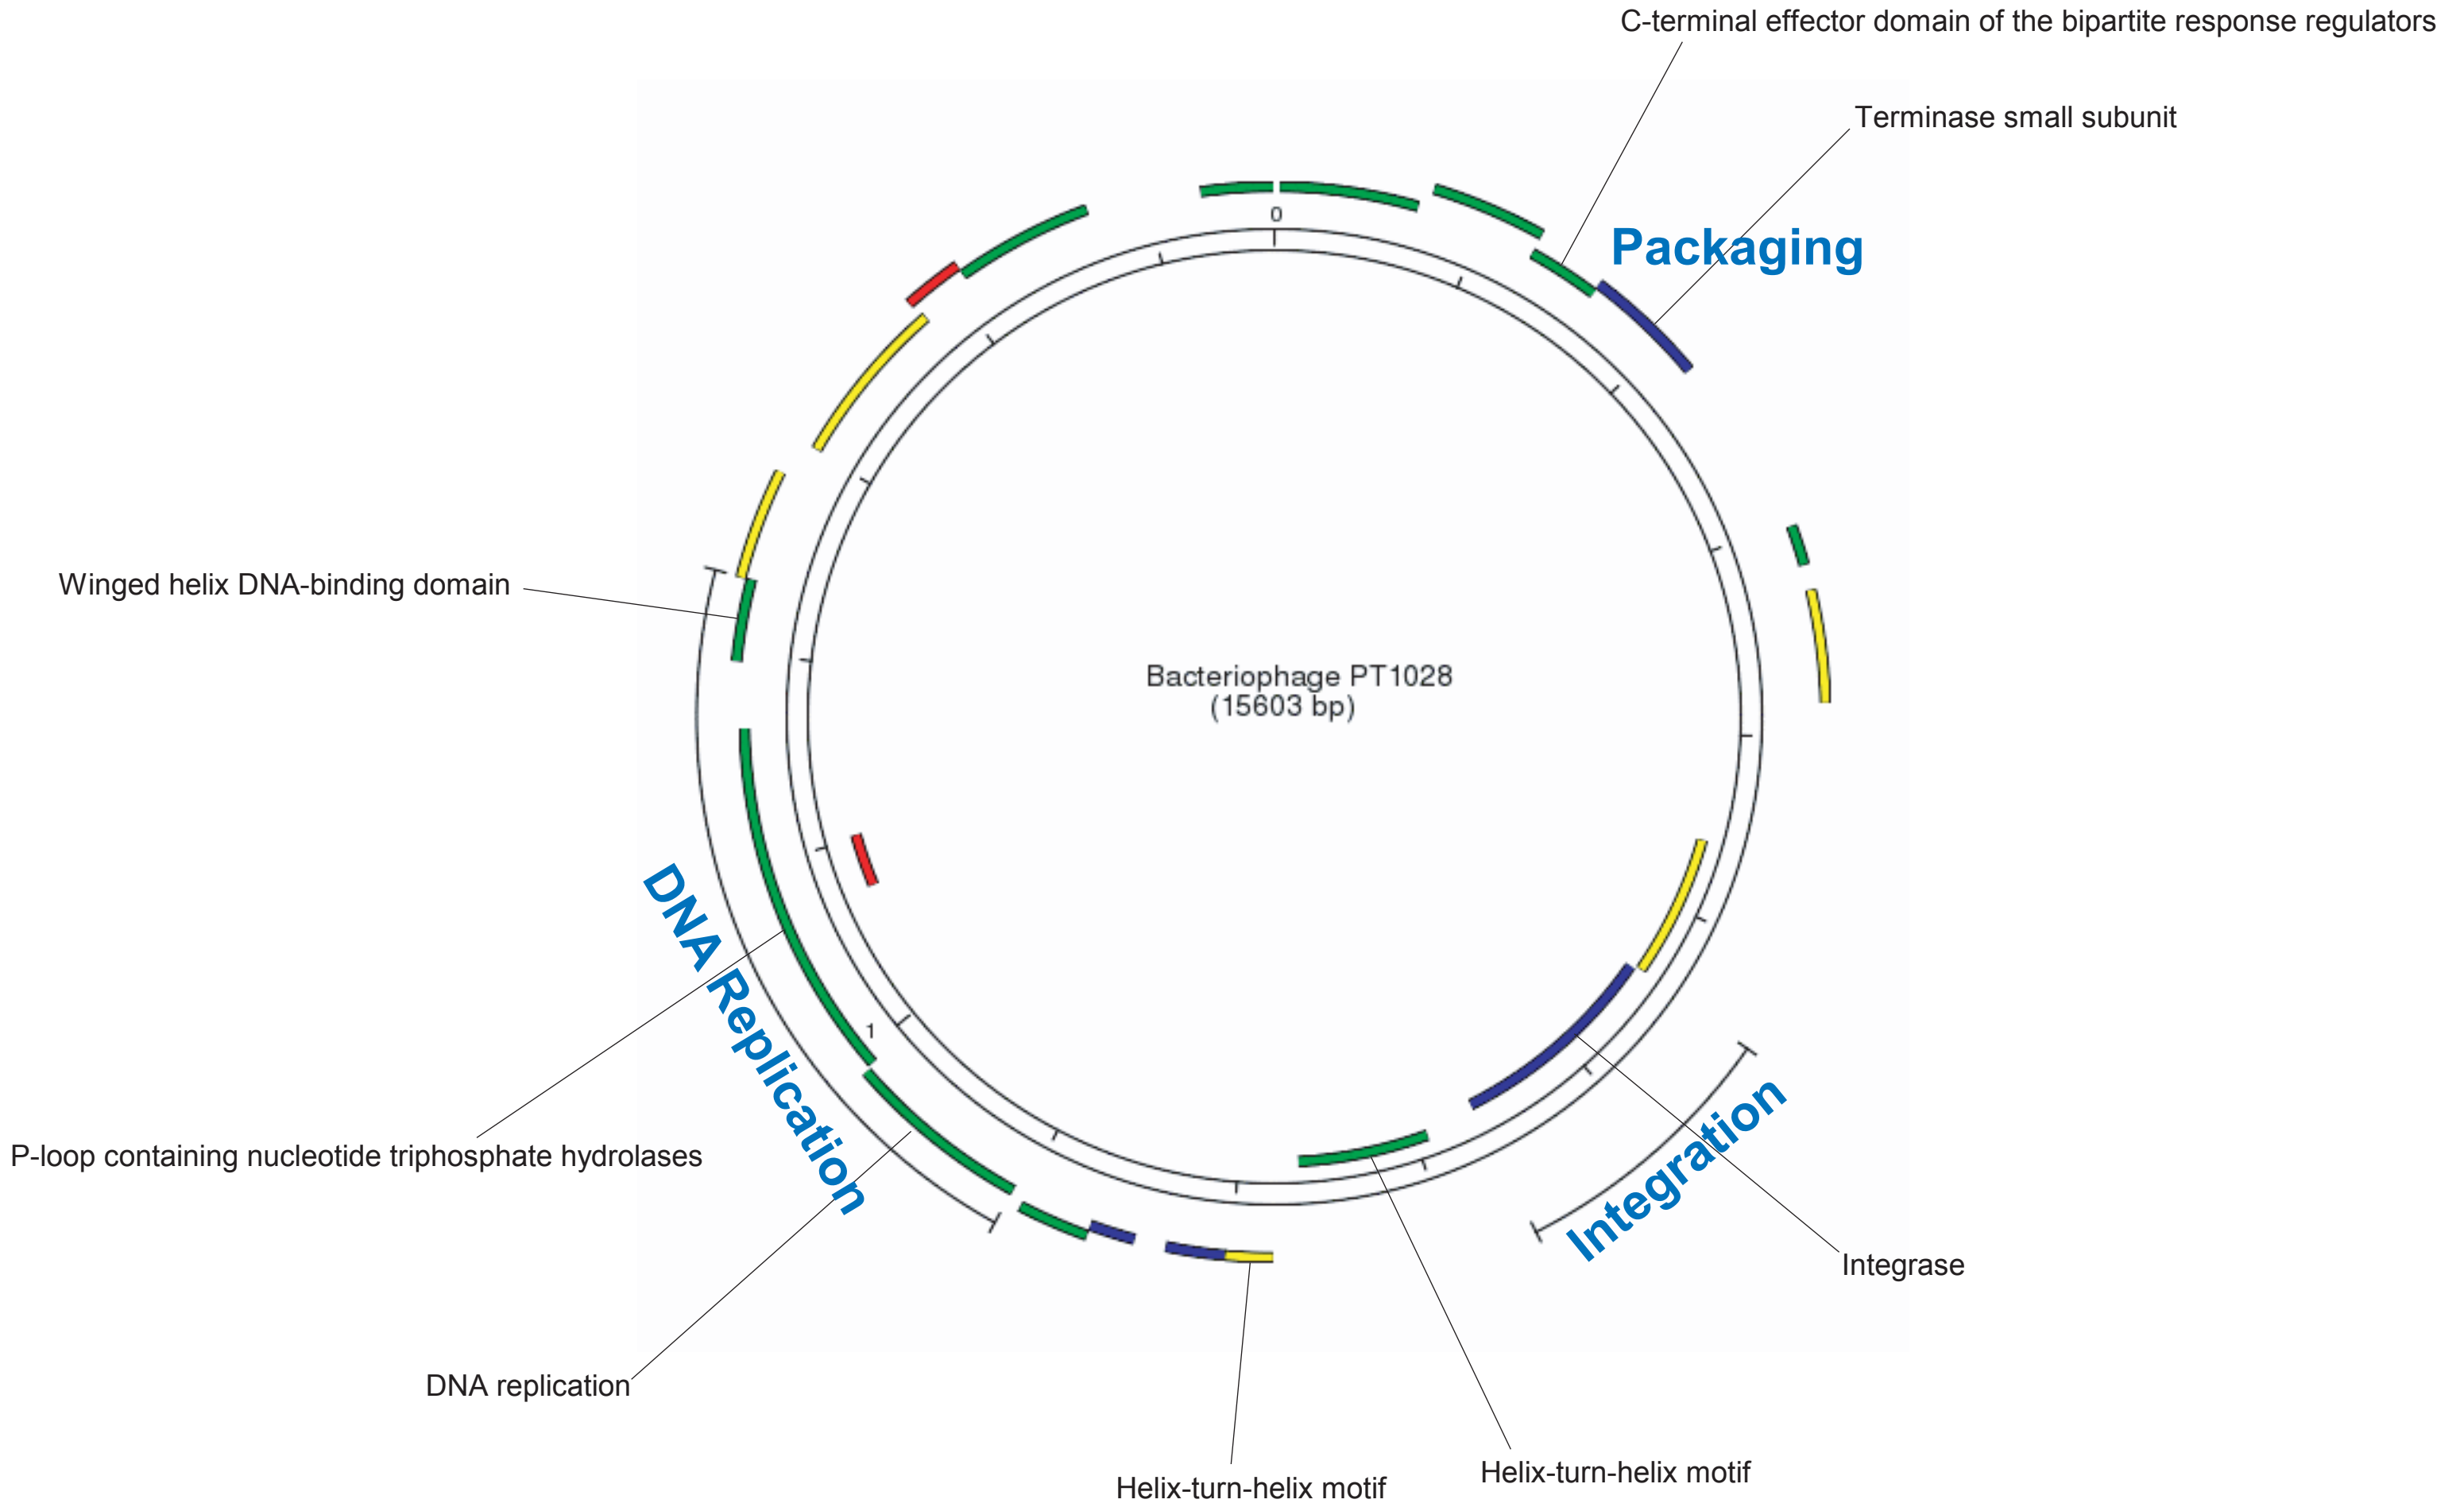

Bacteriophage PT1028  
(15603 bp)

**DNA Replication**

**Packaging**

**Integration**

Winged helix DNA-binding domain

P-loop containing nucleotide triphosphate hydrolases

DNA replication

Helix-turn-helix motif

Helix-turn-helix motif

C-terminal effector domain of the bipartite response regulators

Terminase small subunit

Integrase

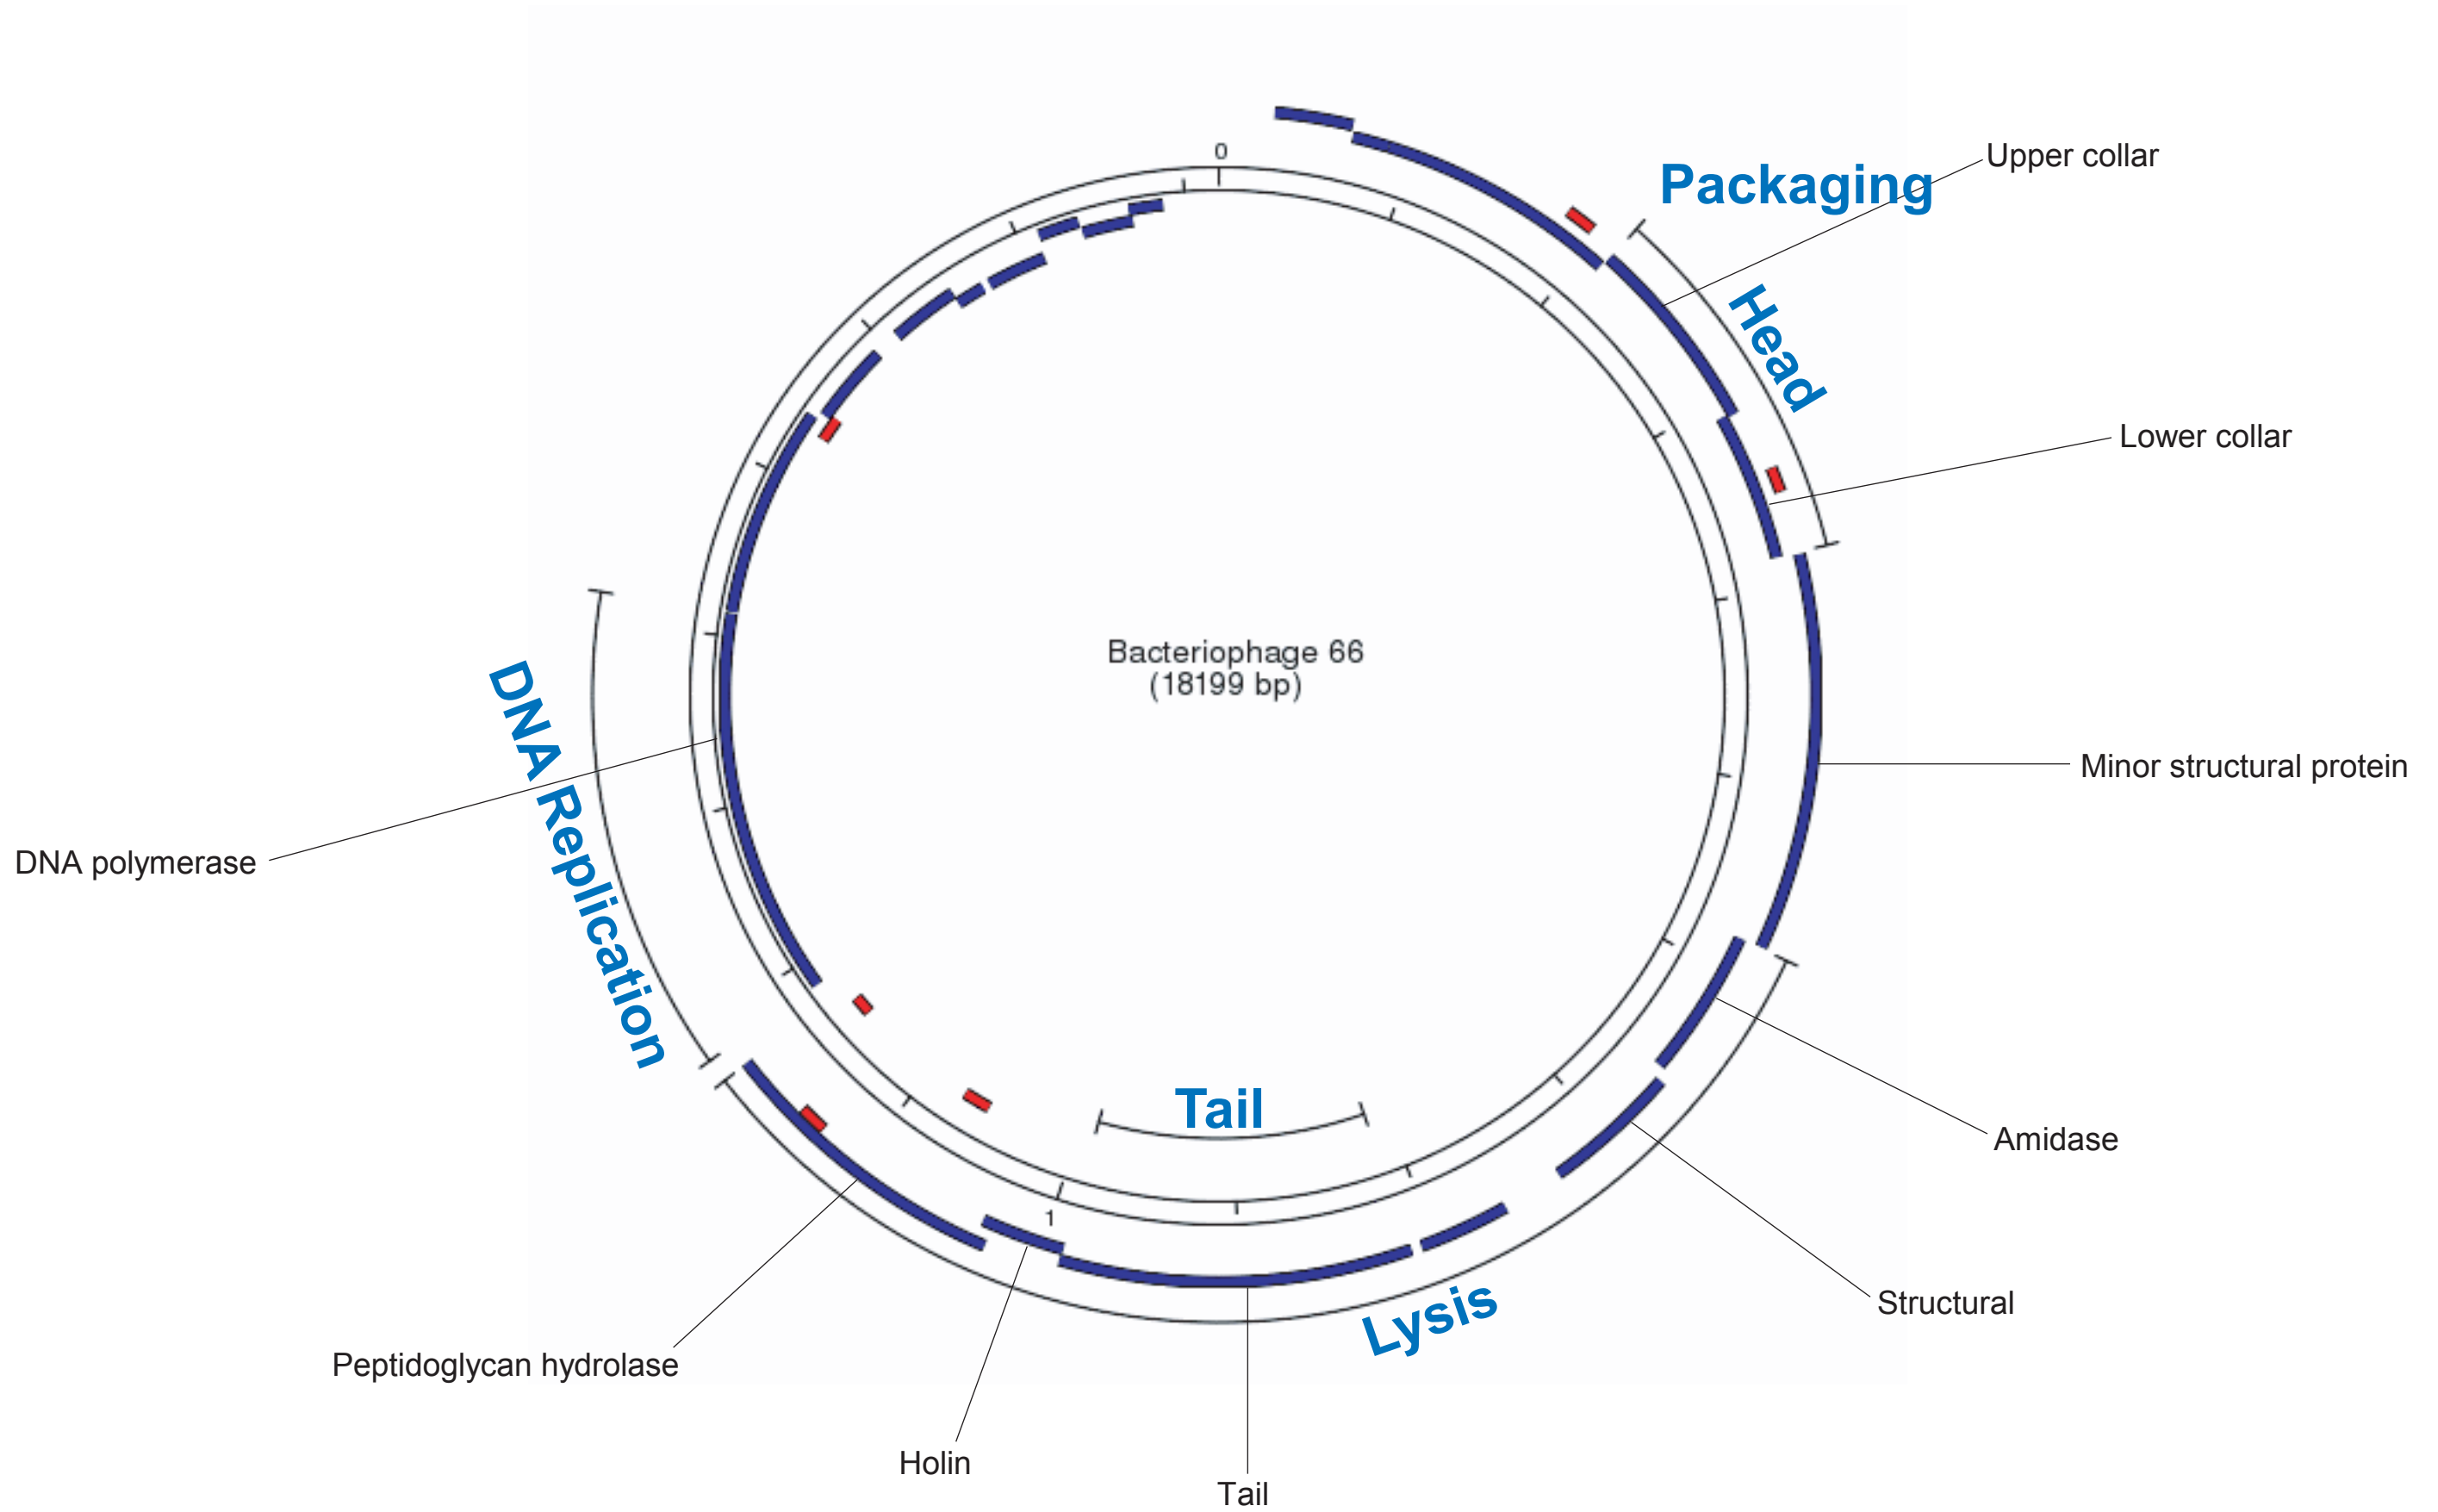

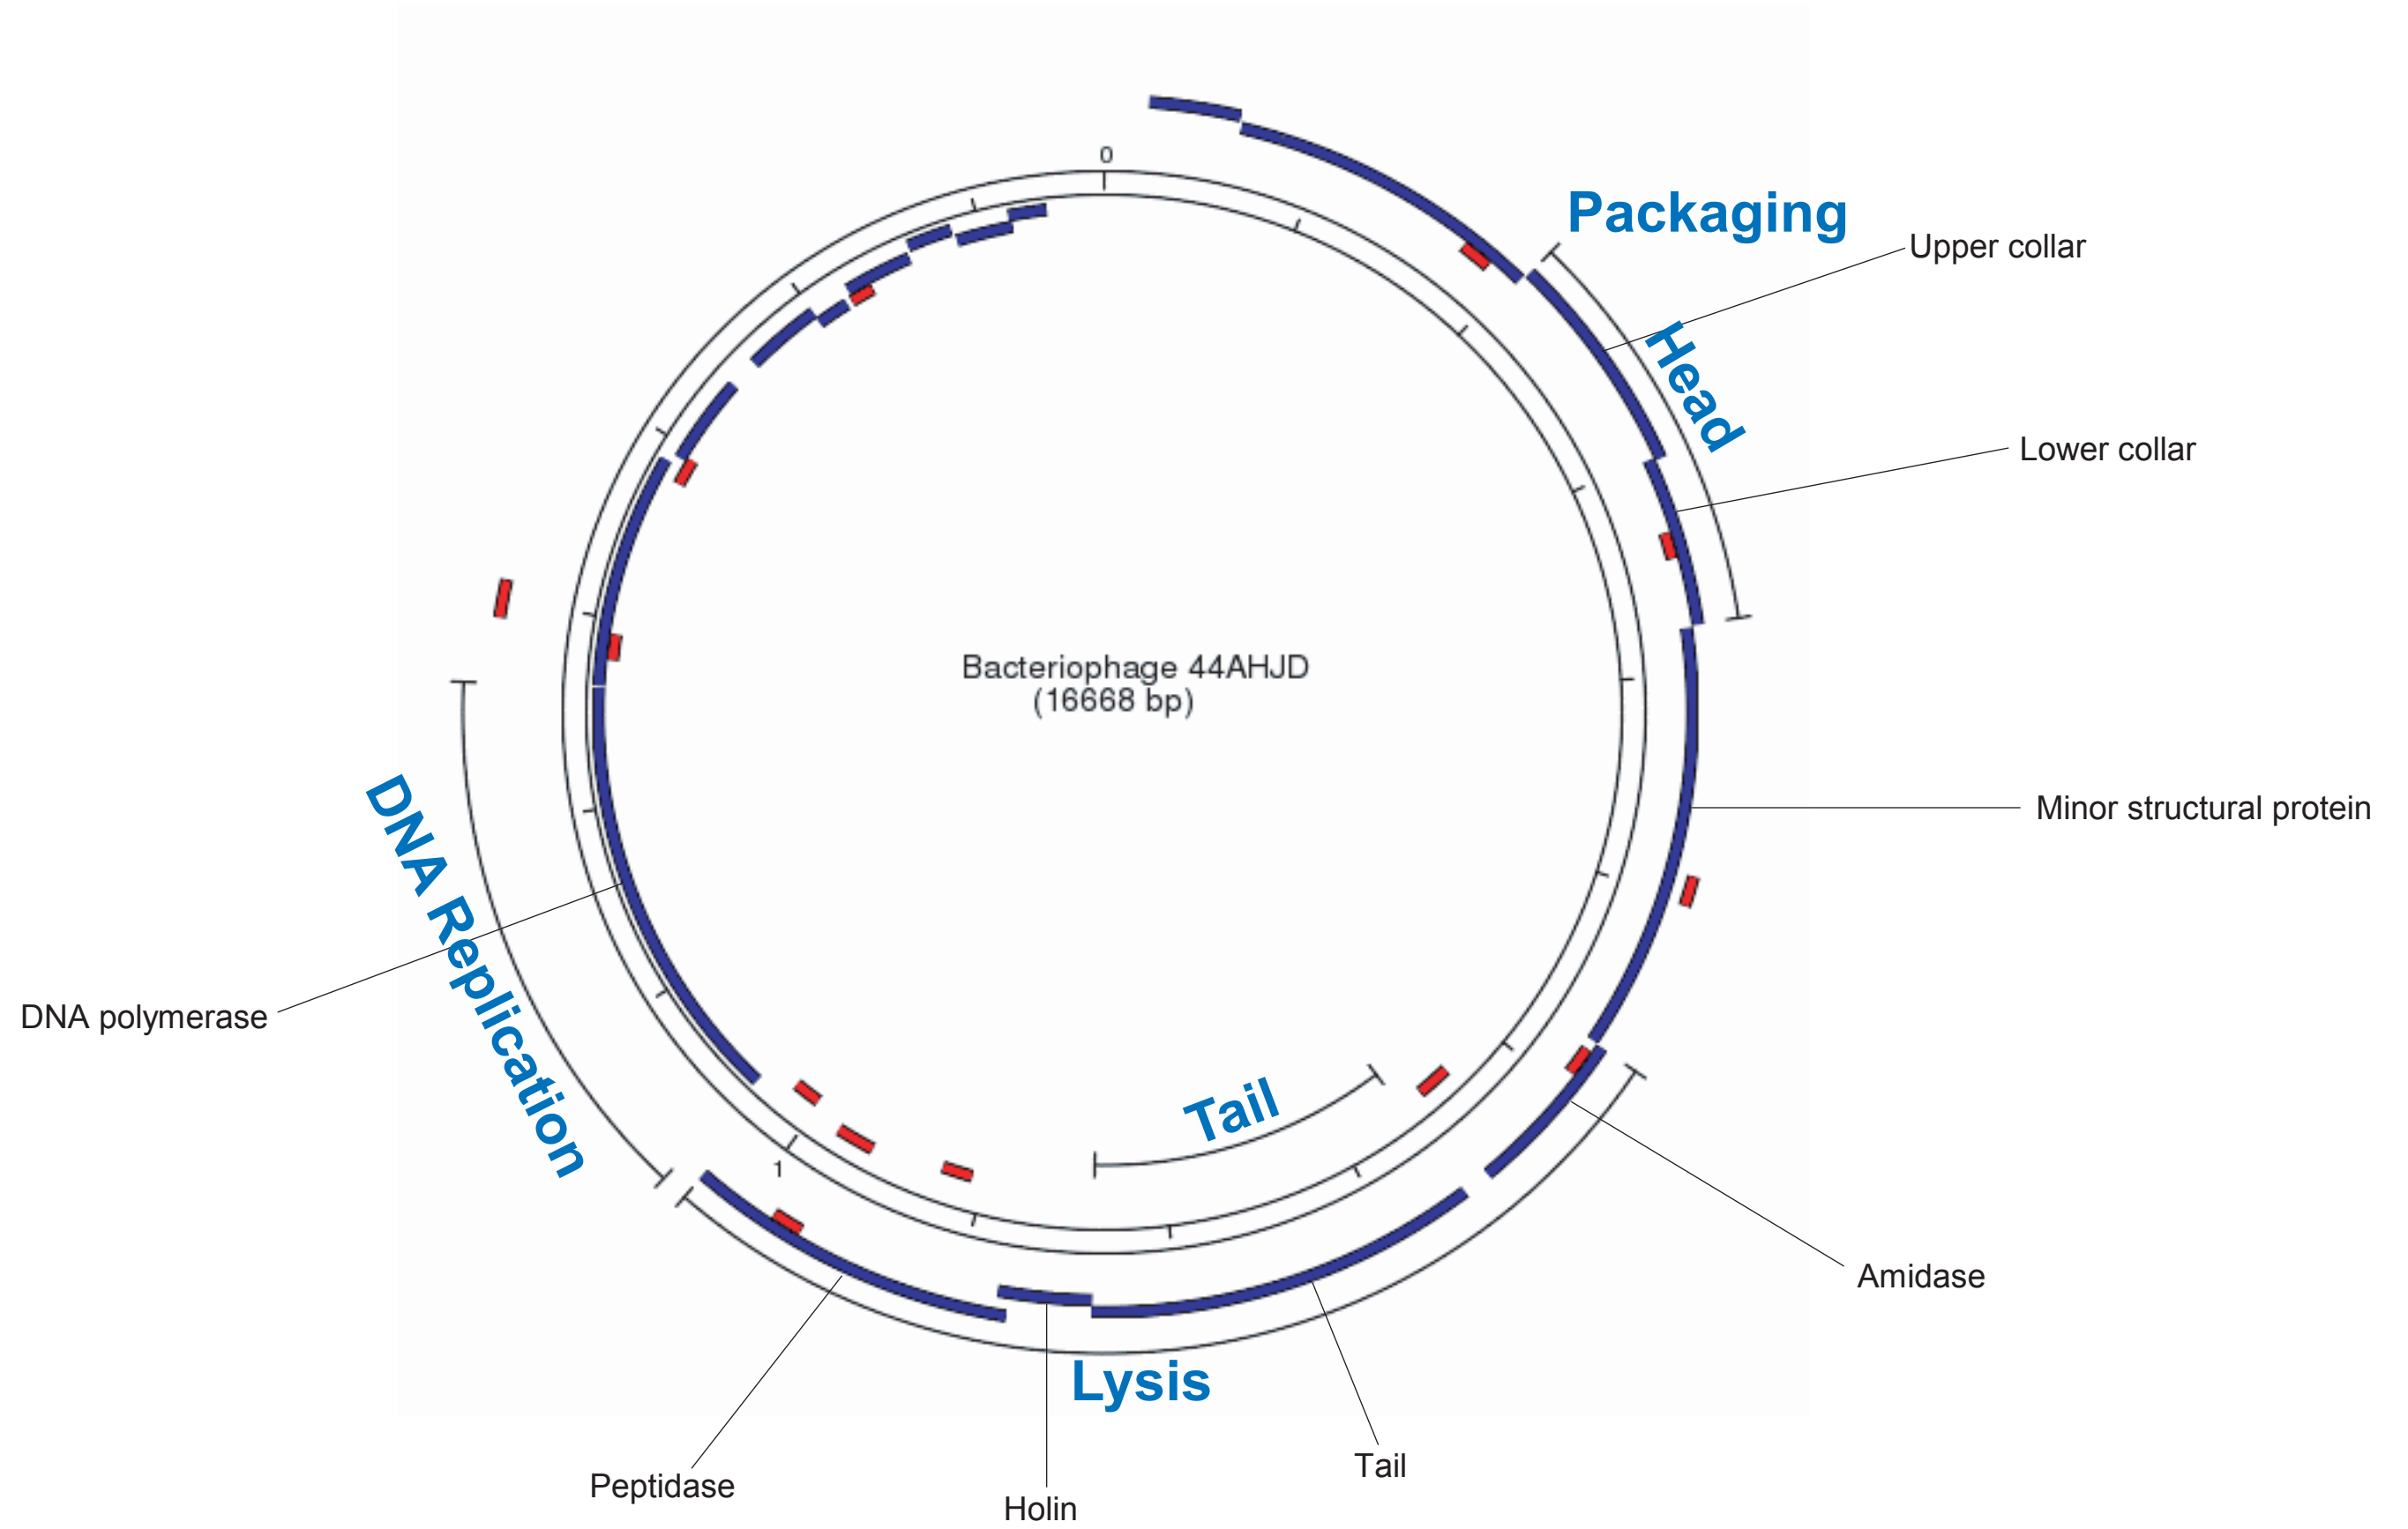

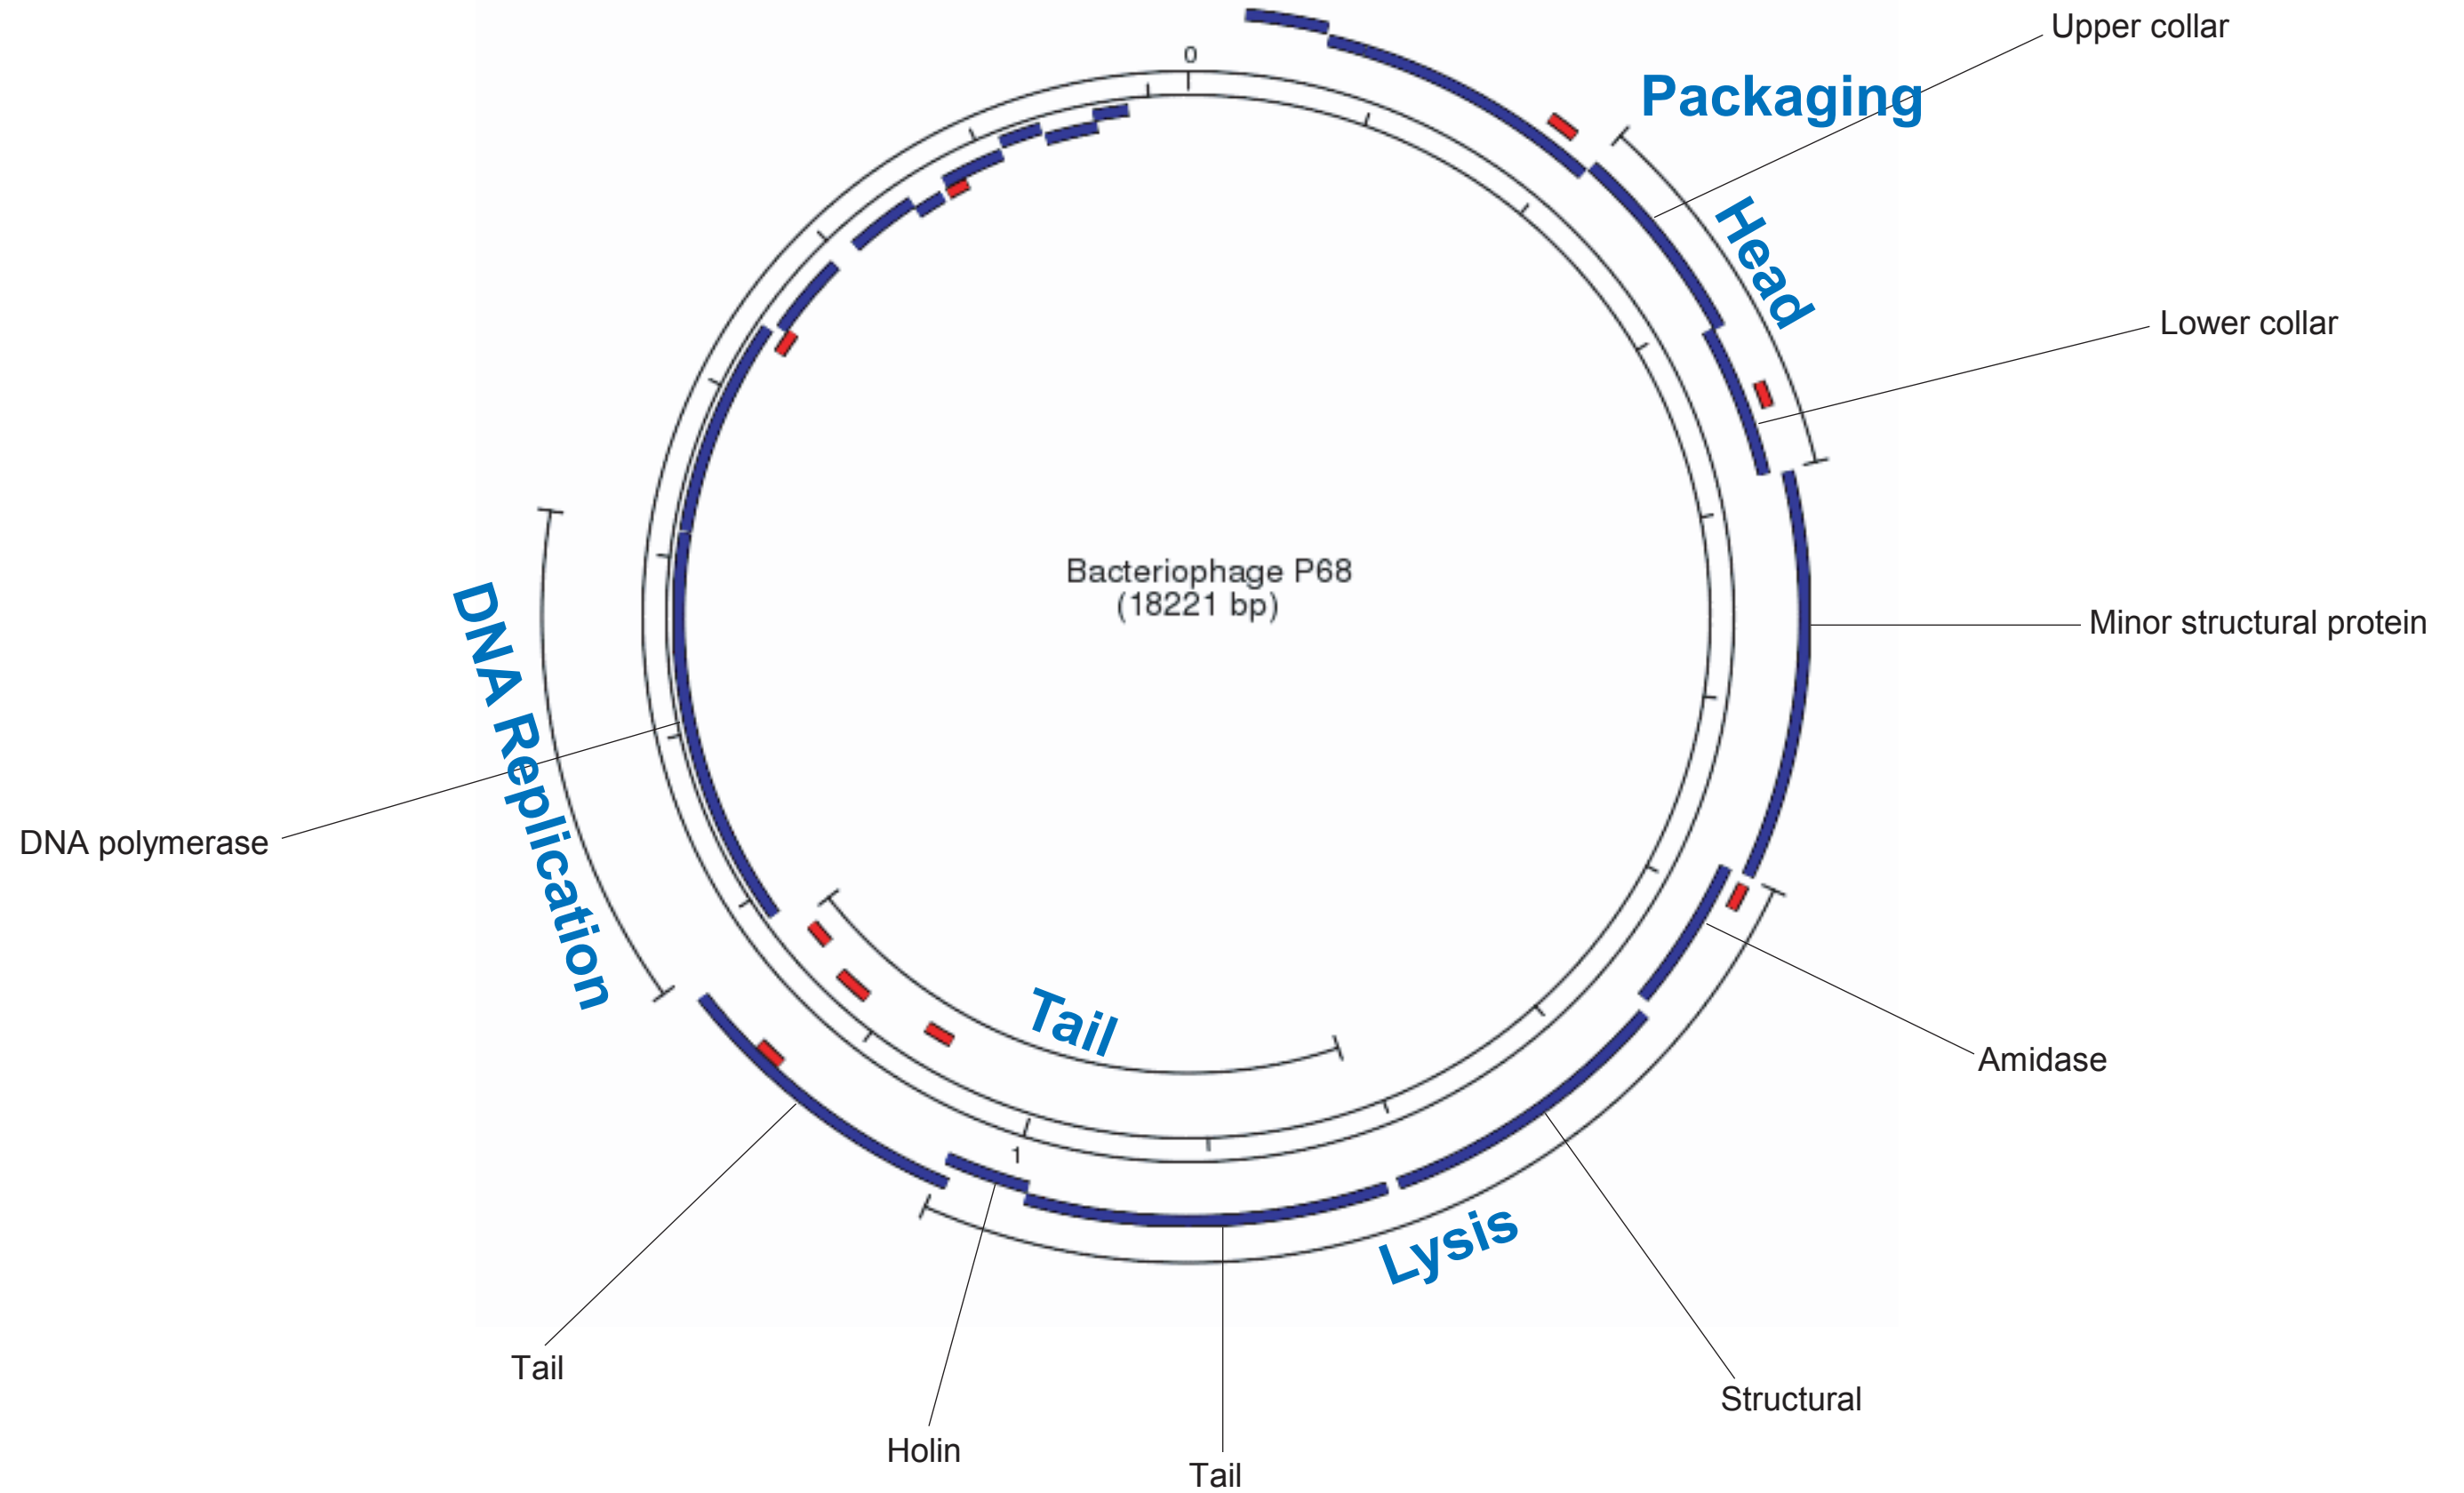

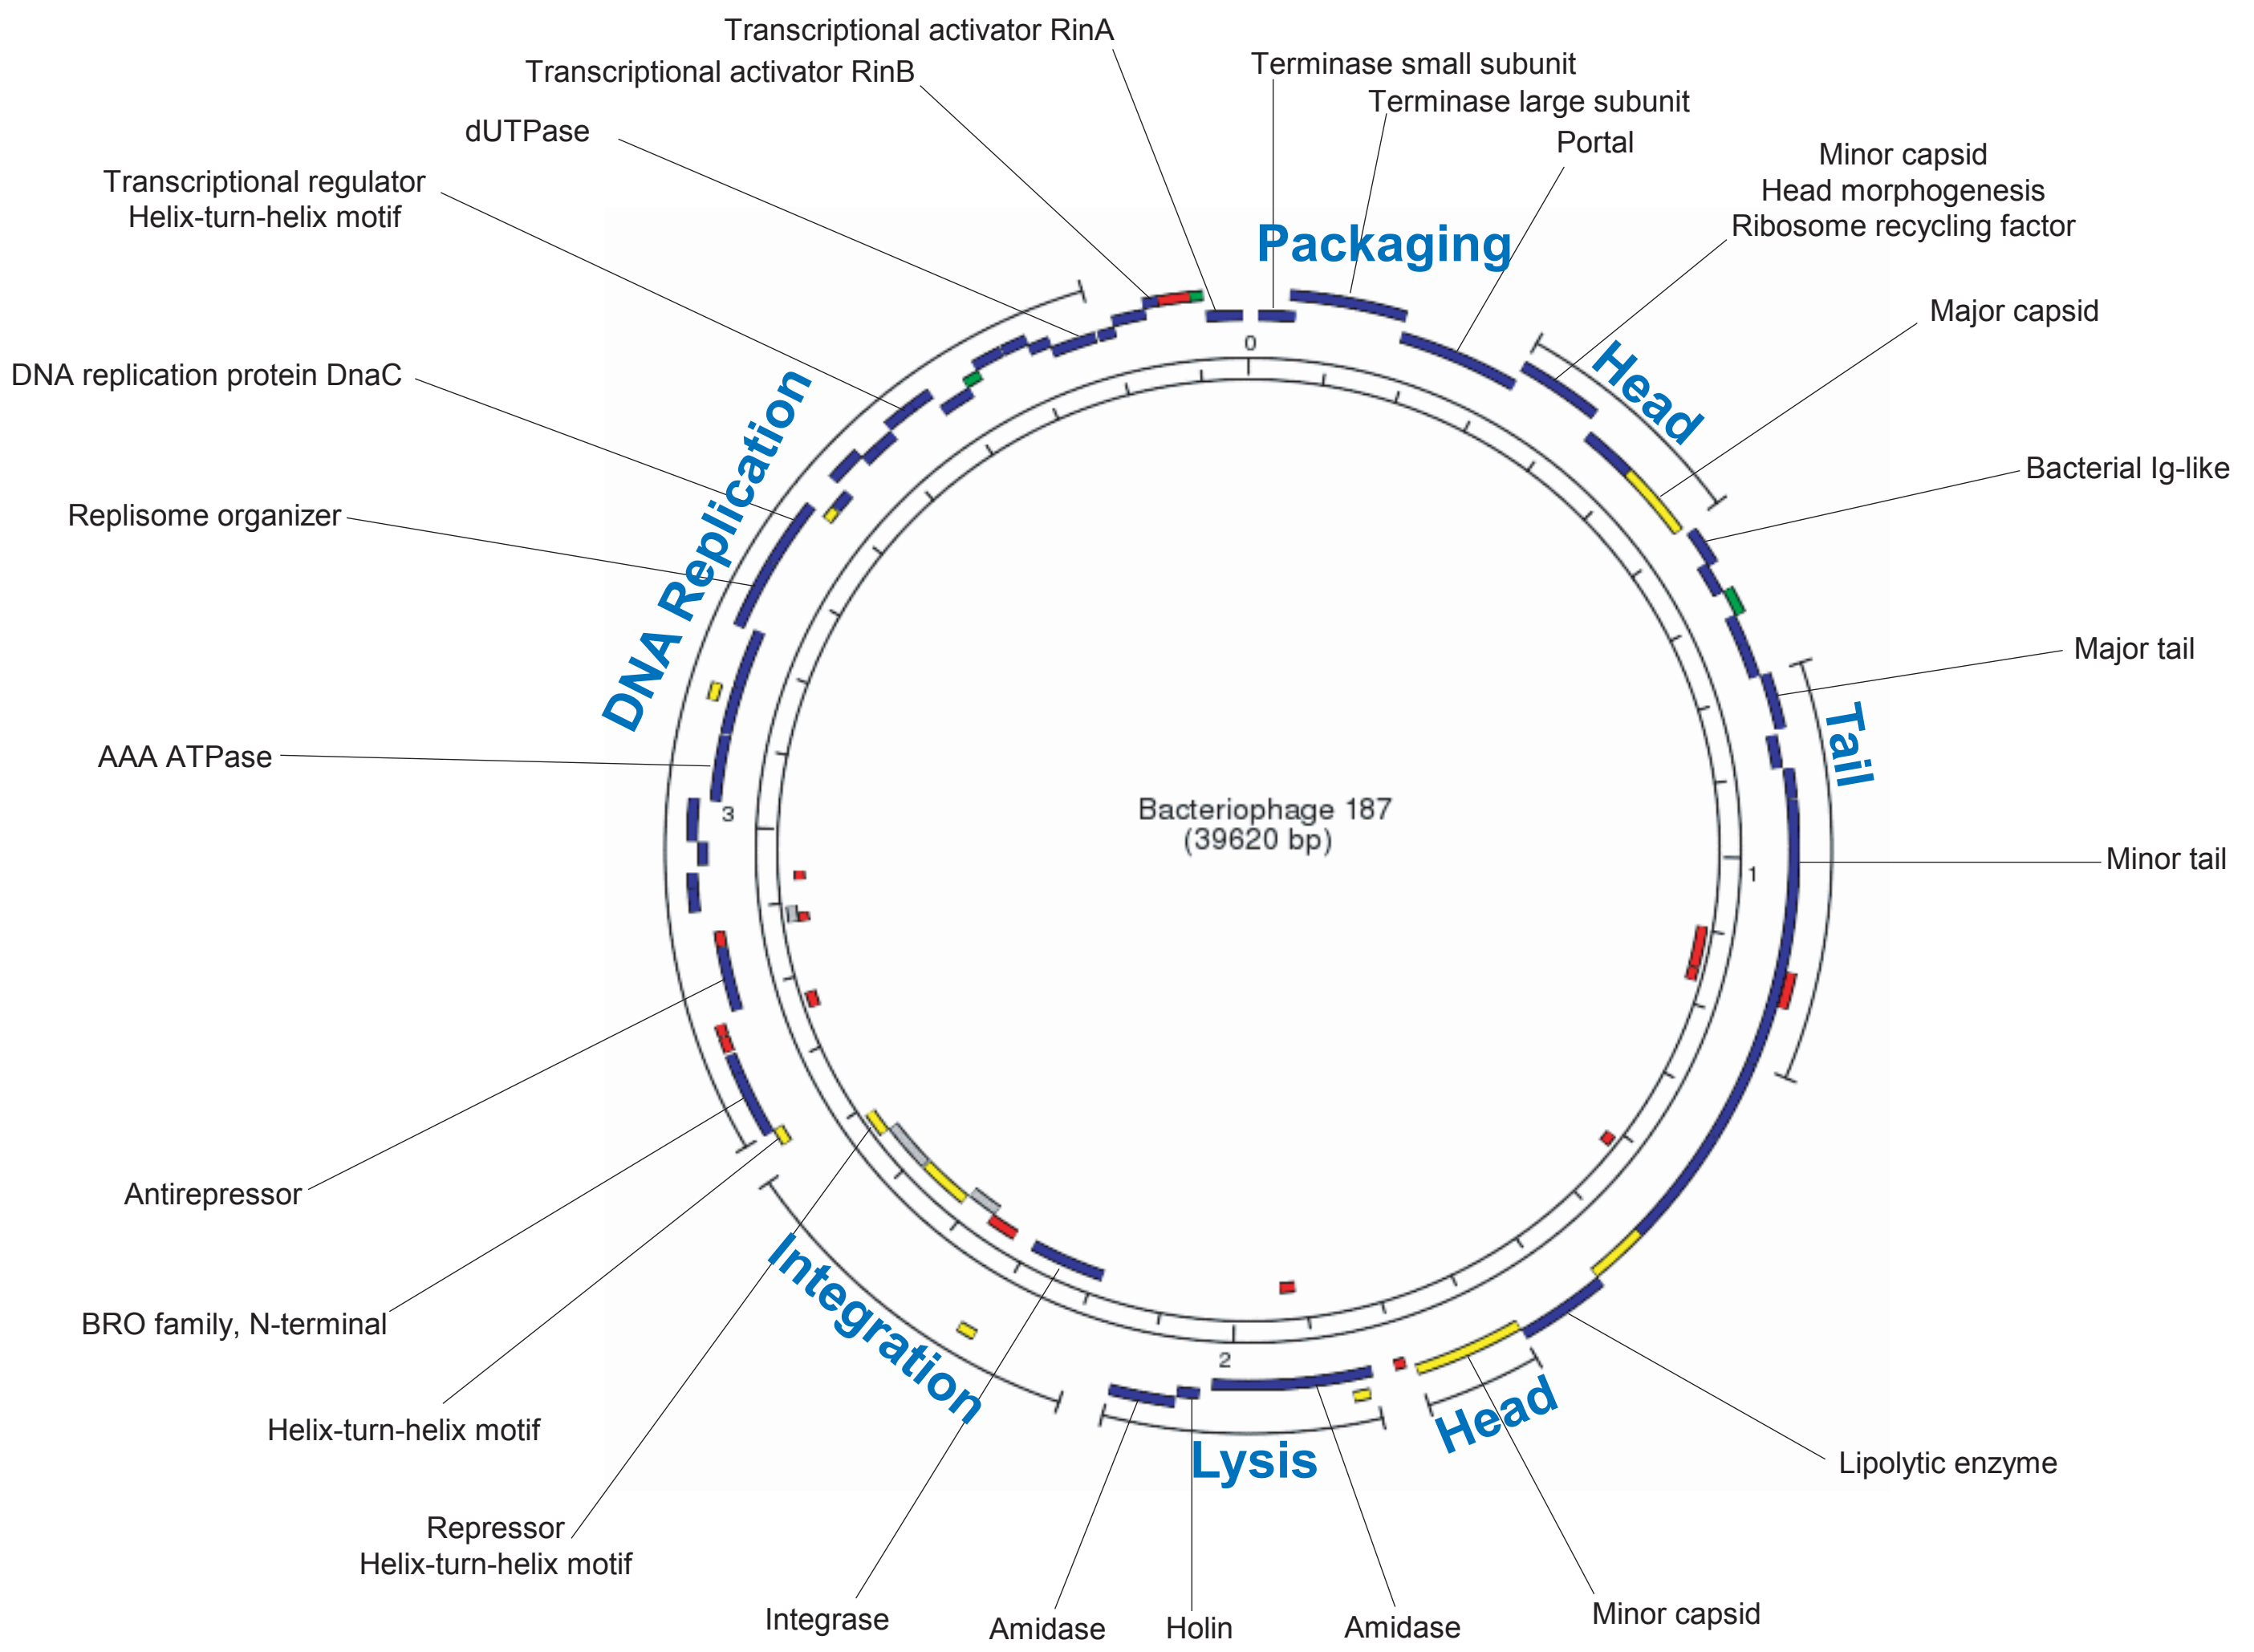

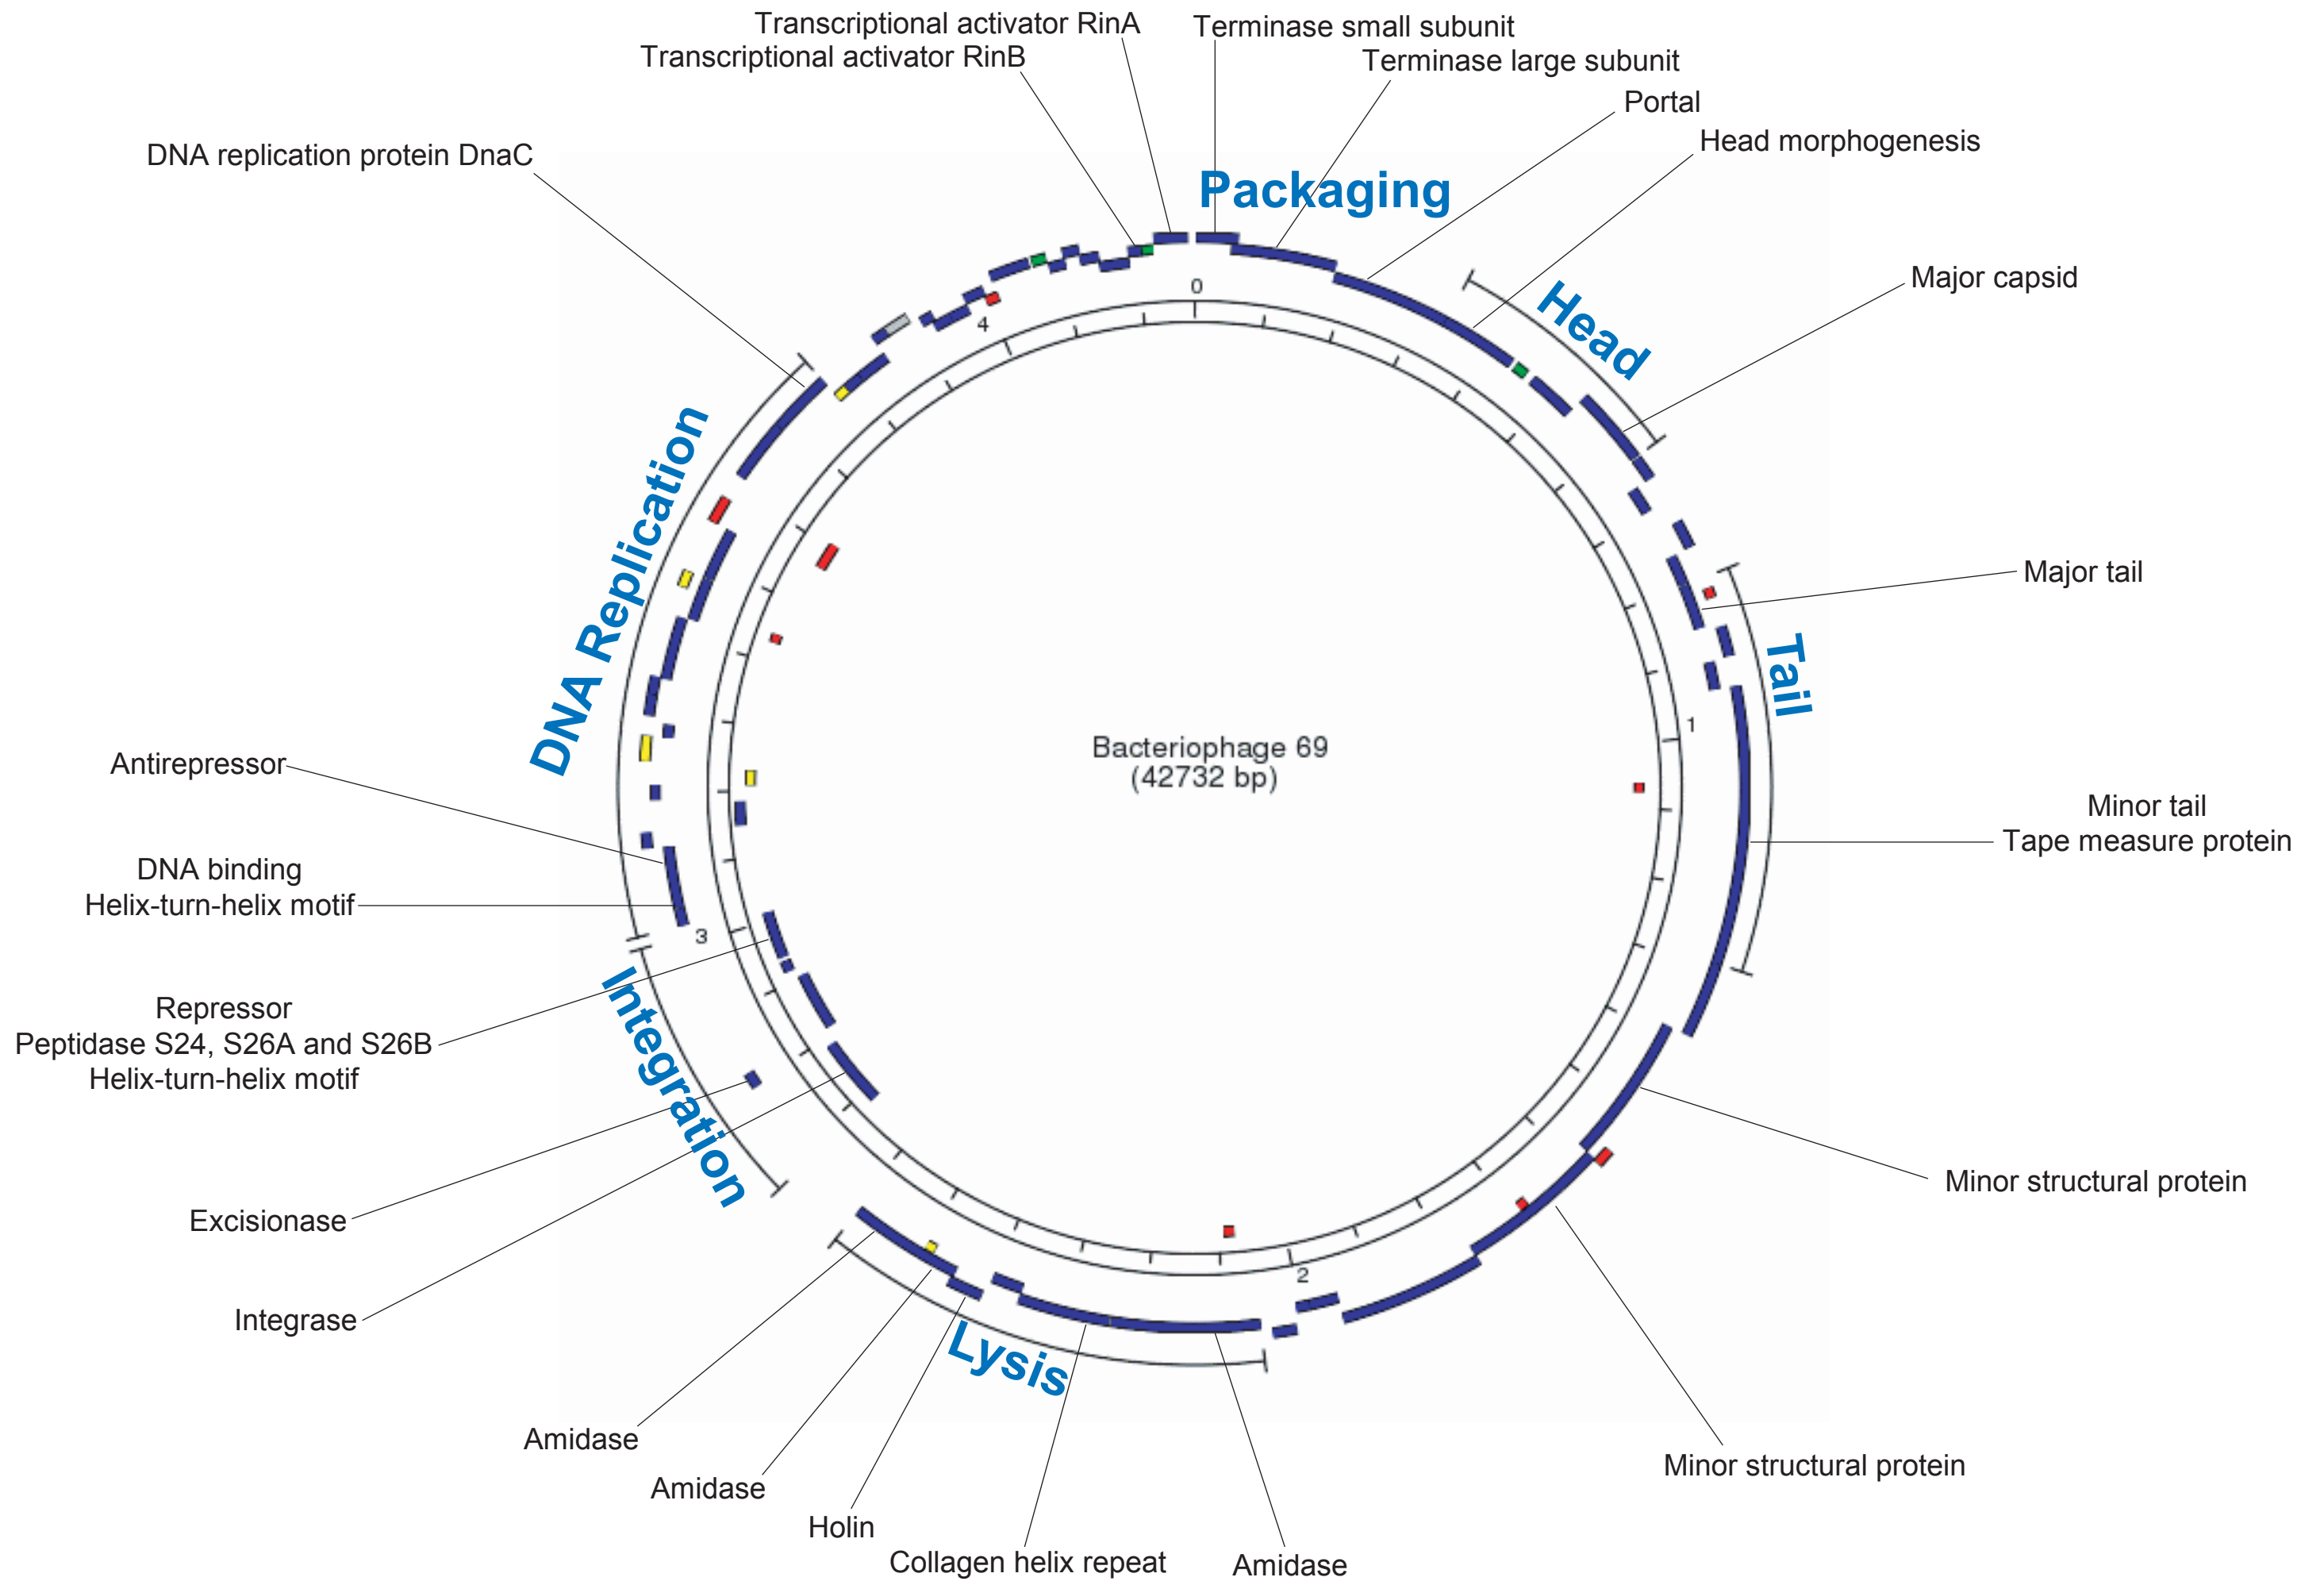

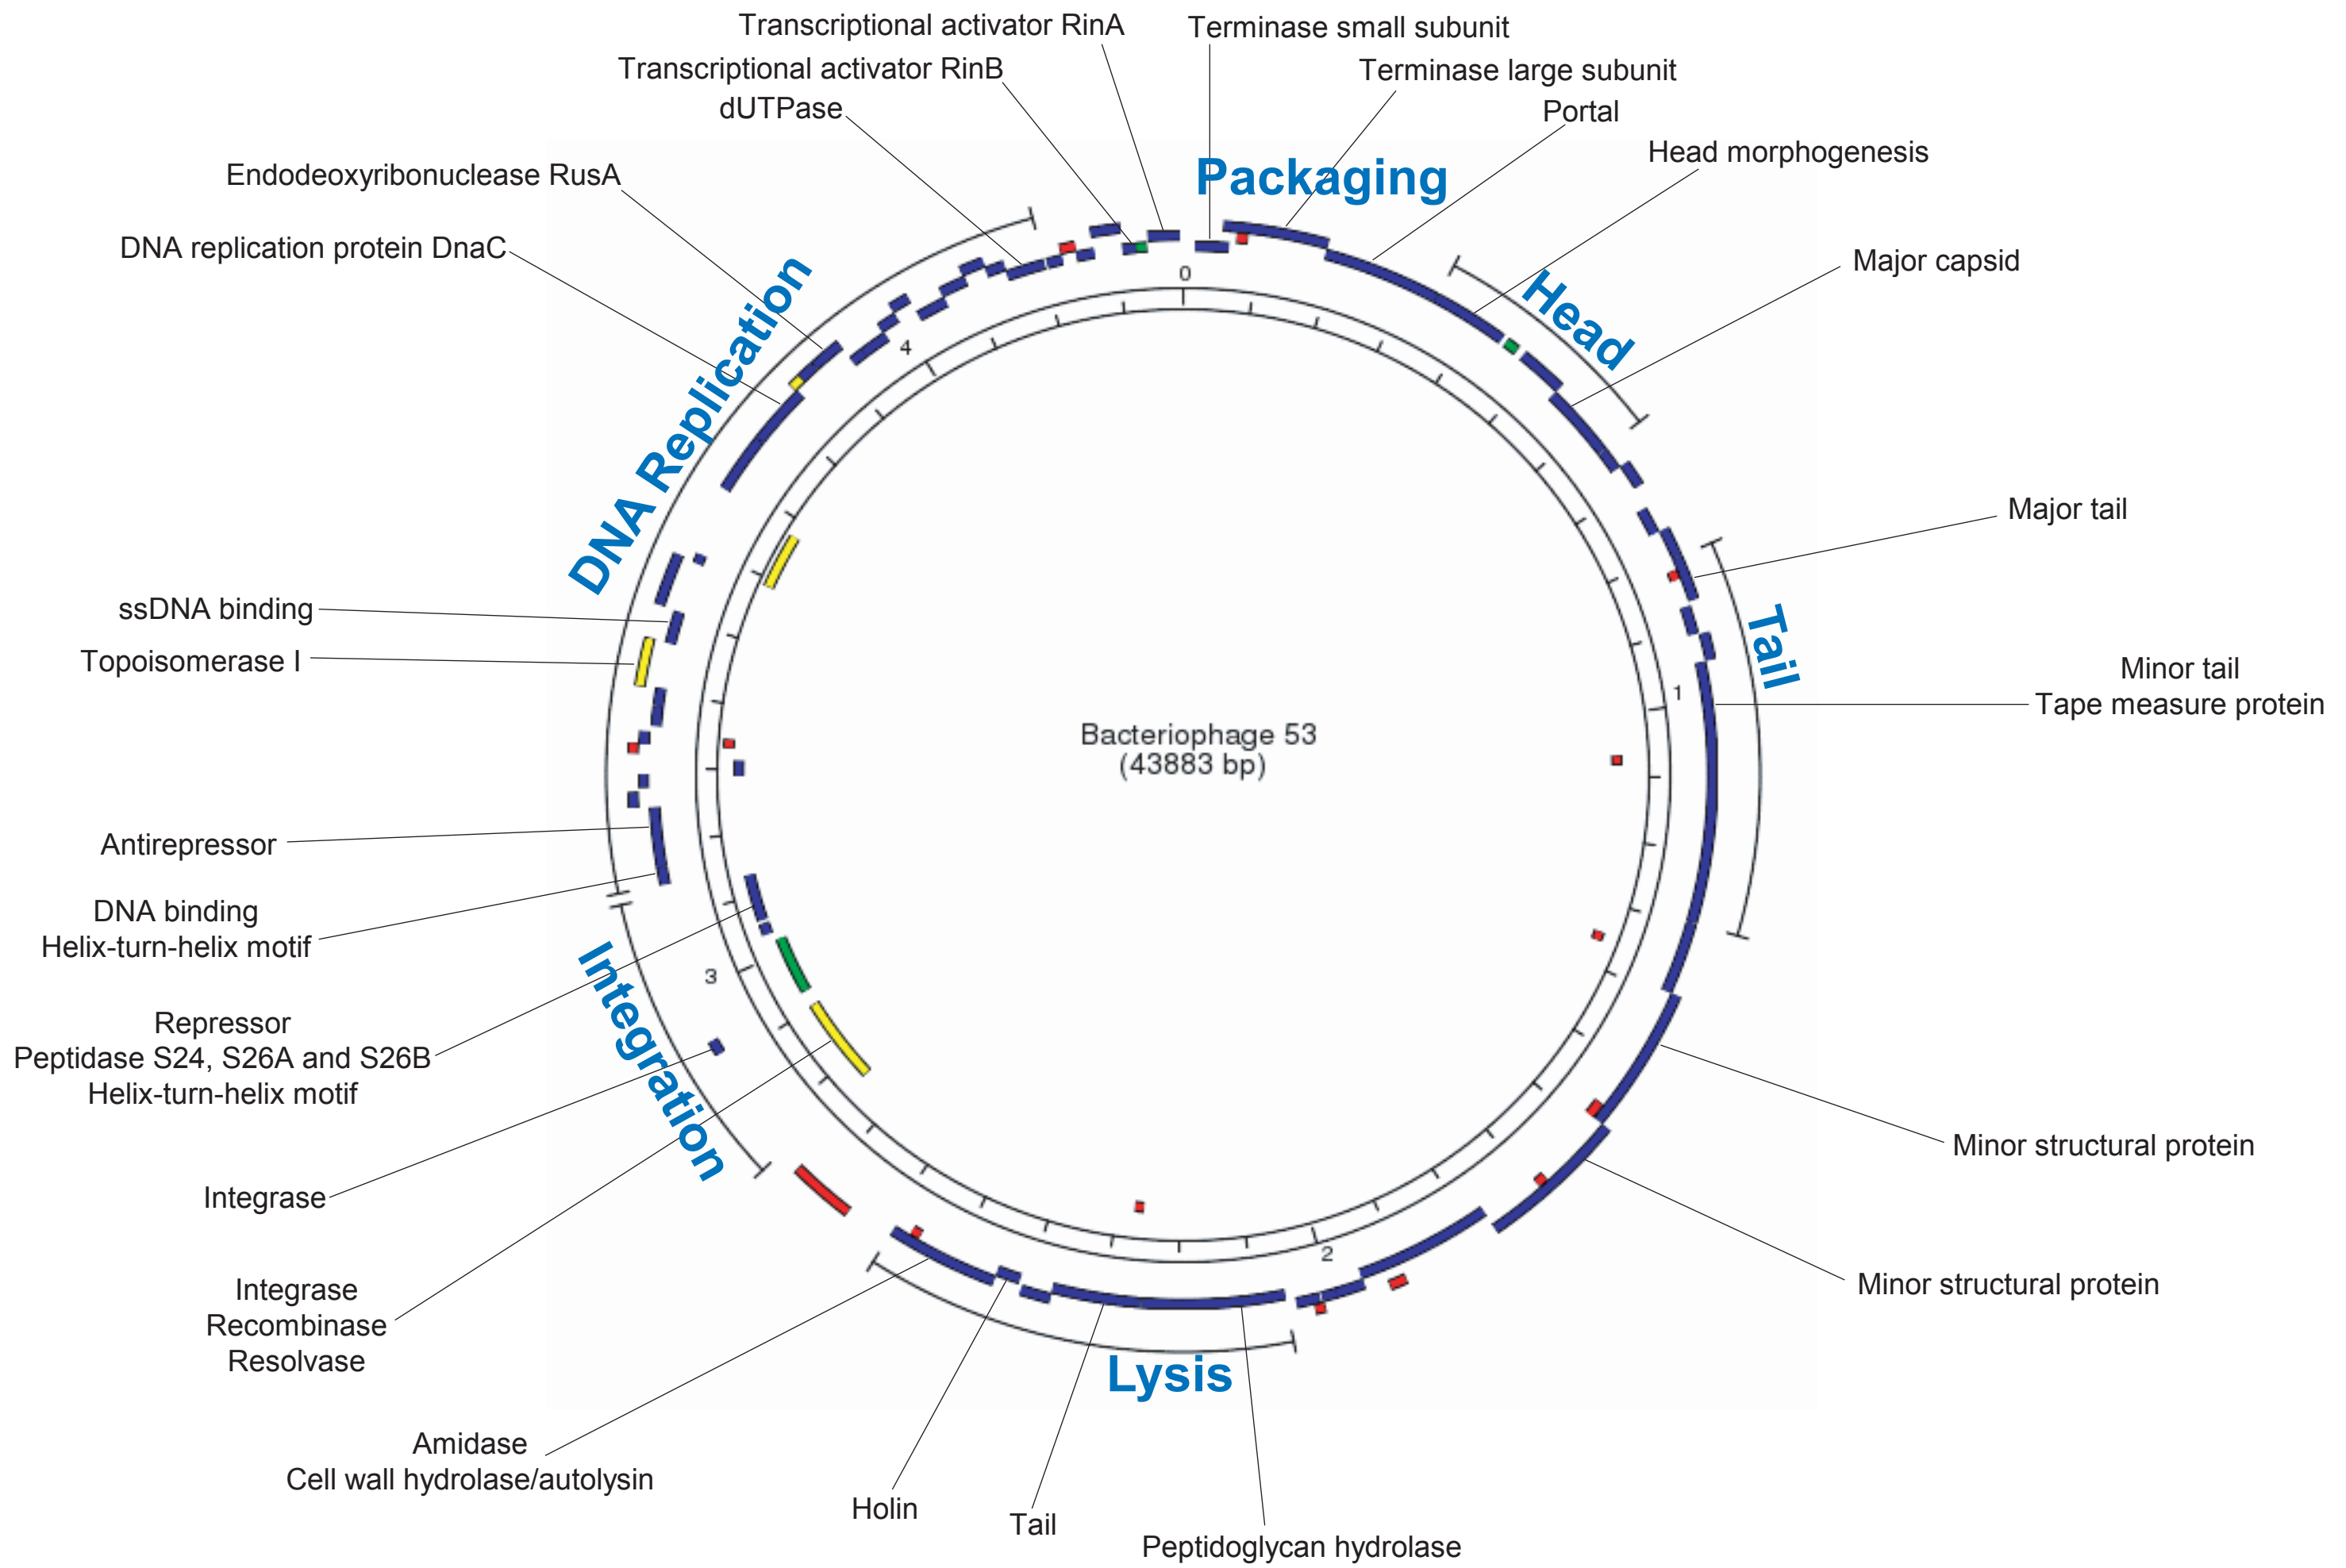

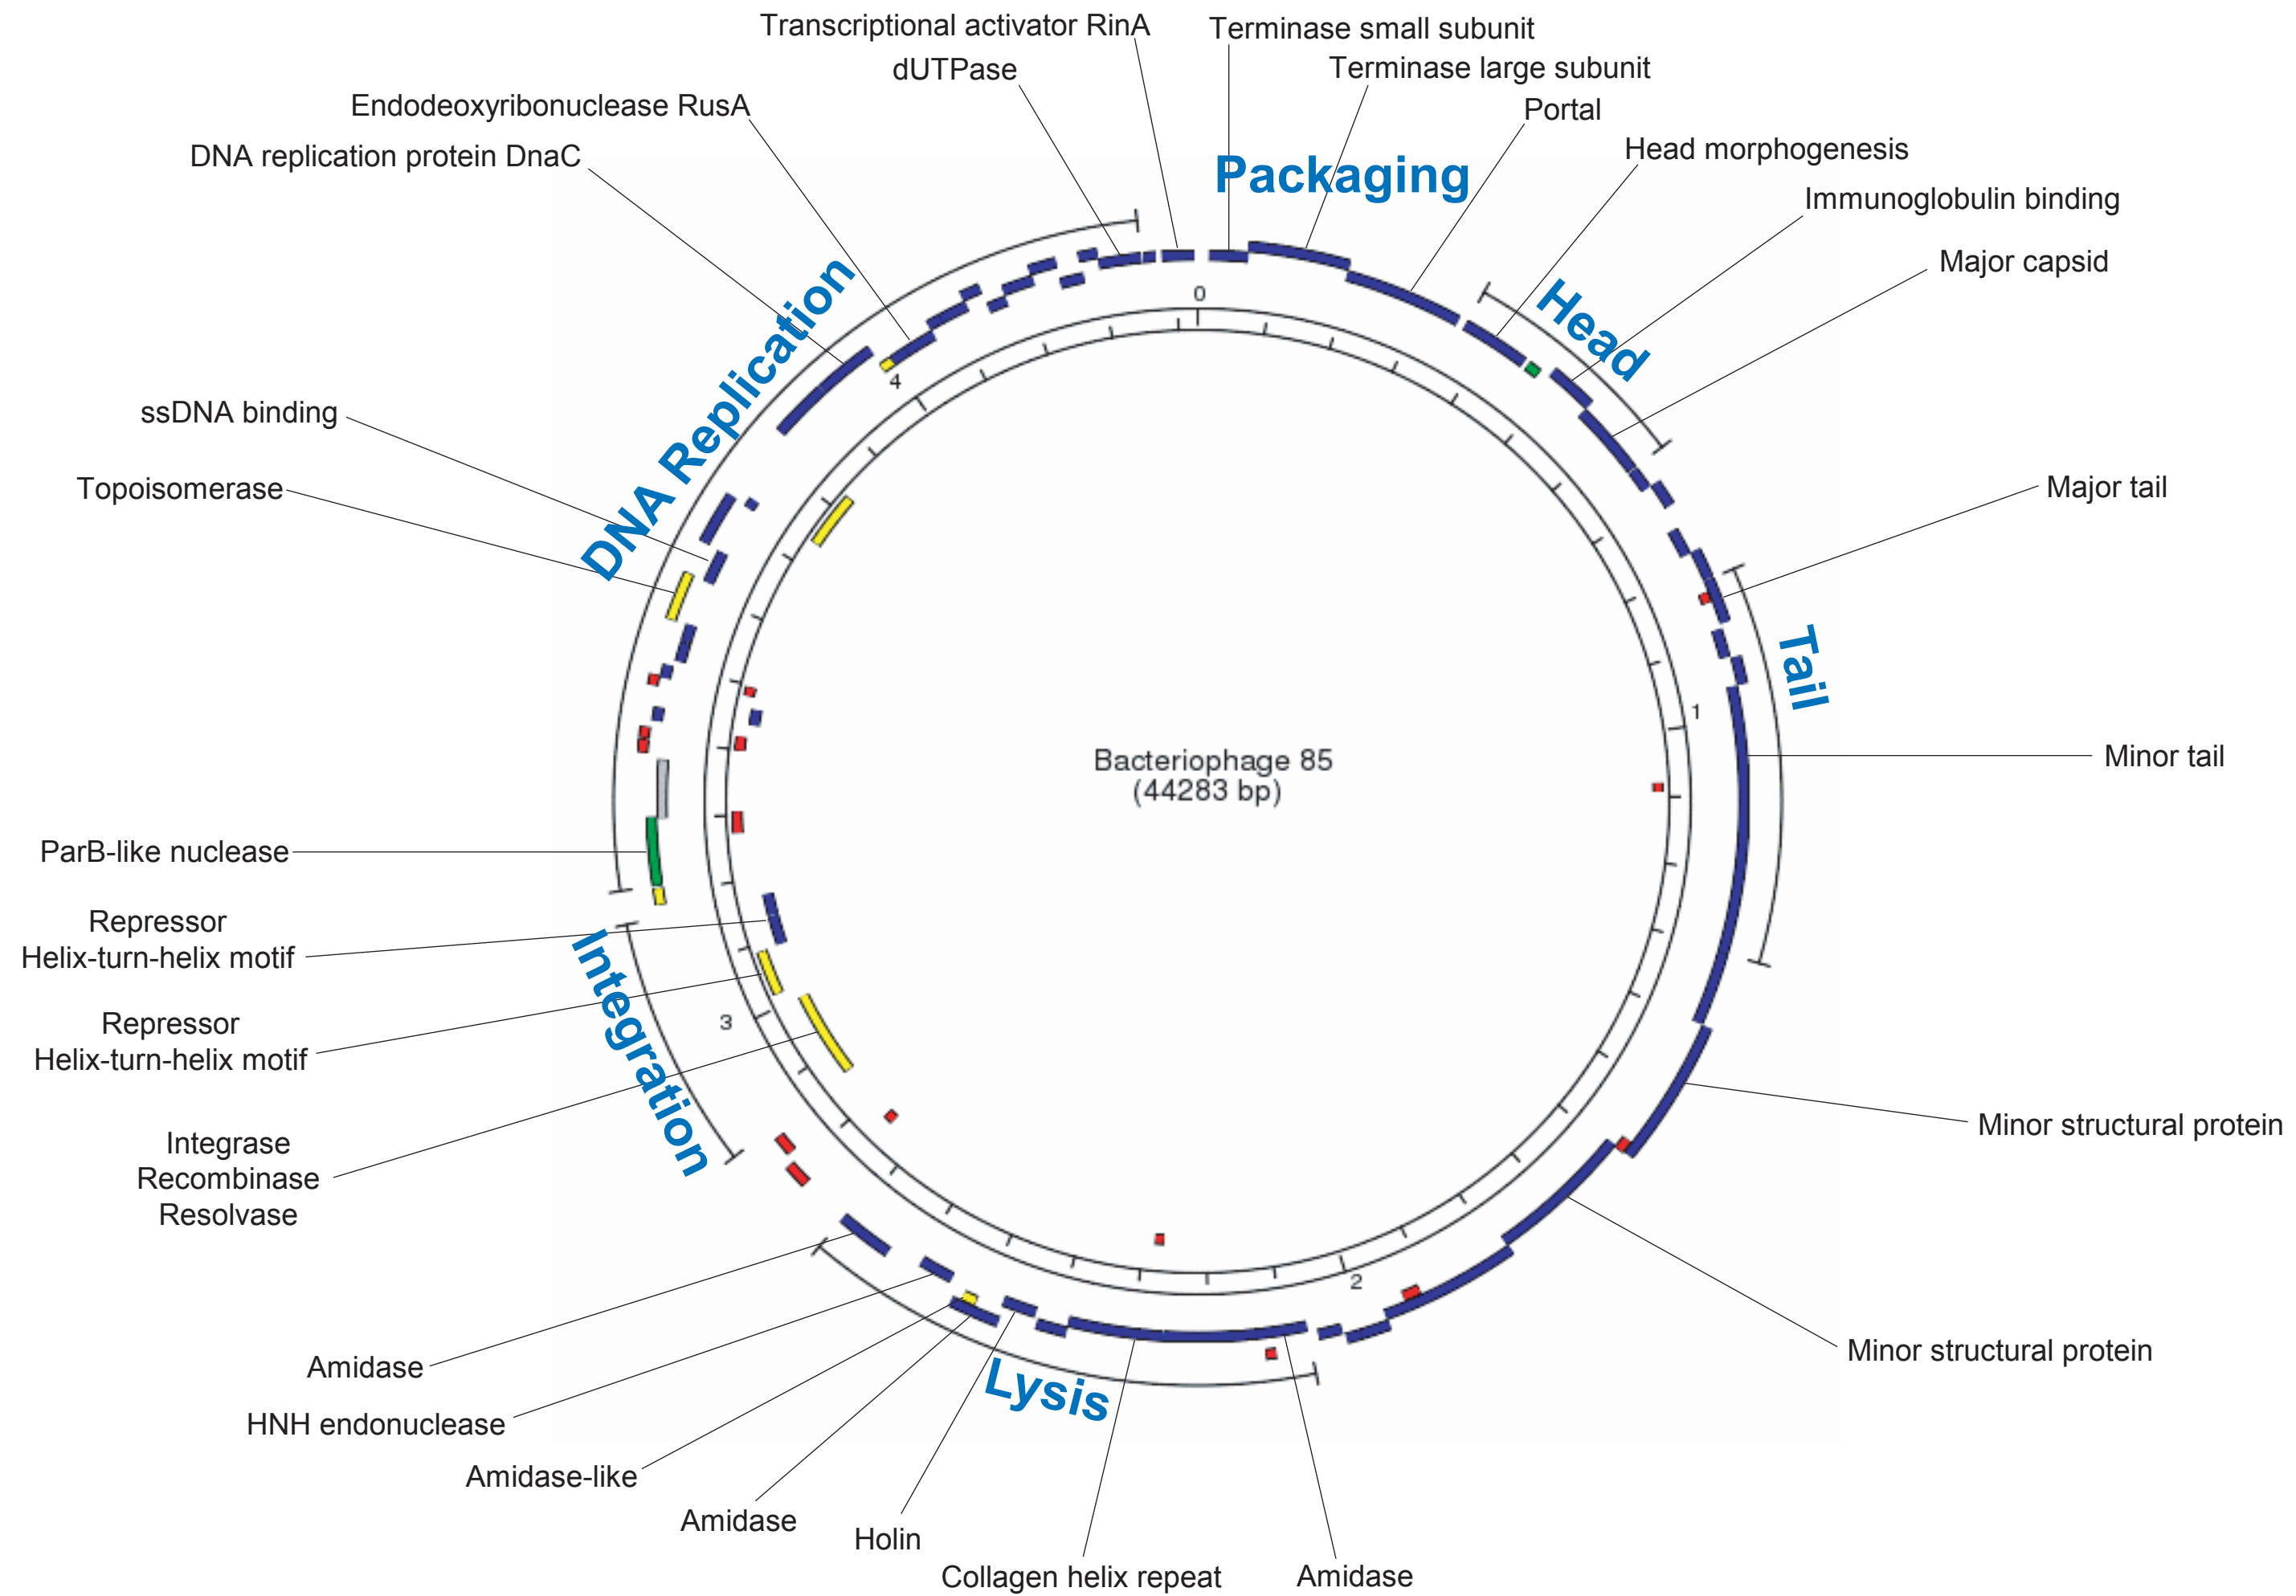



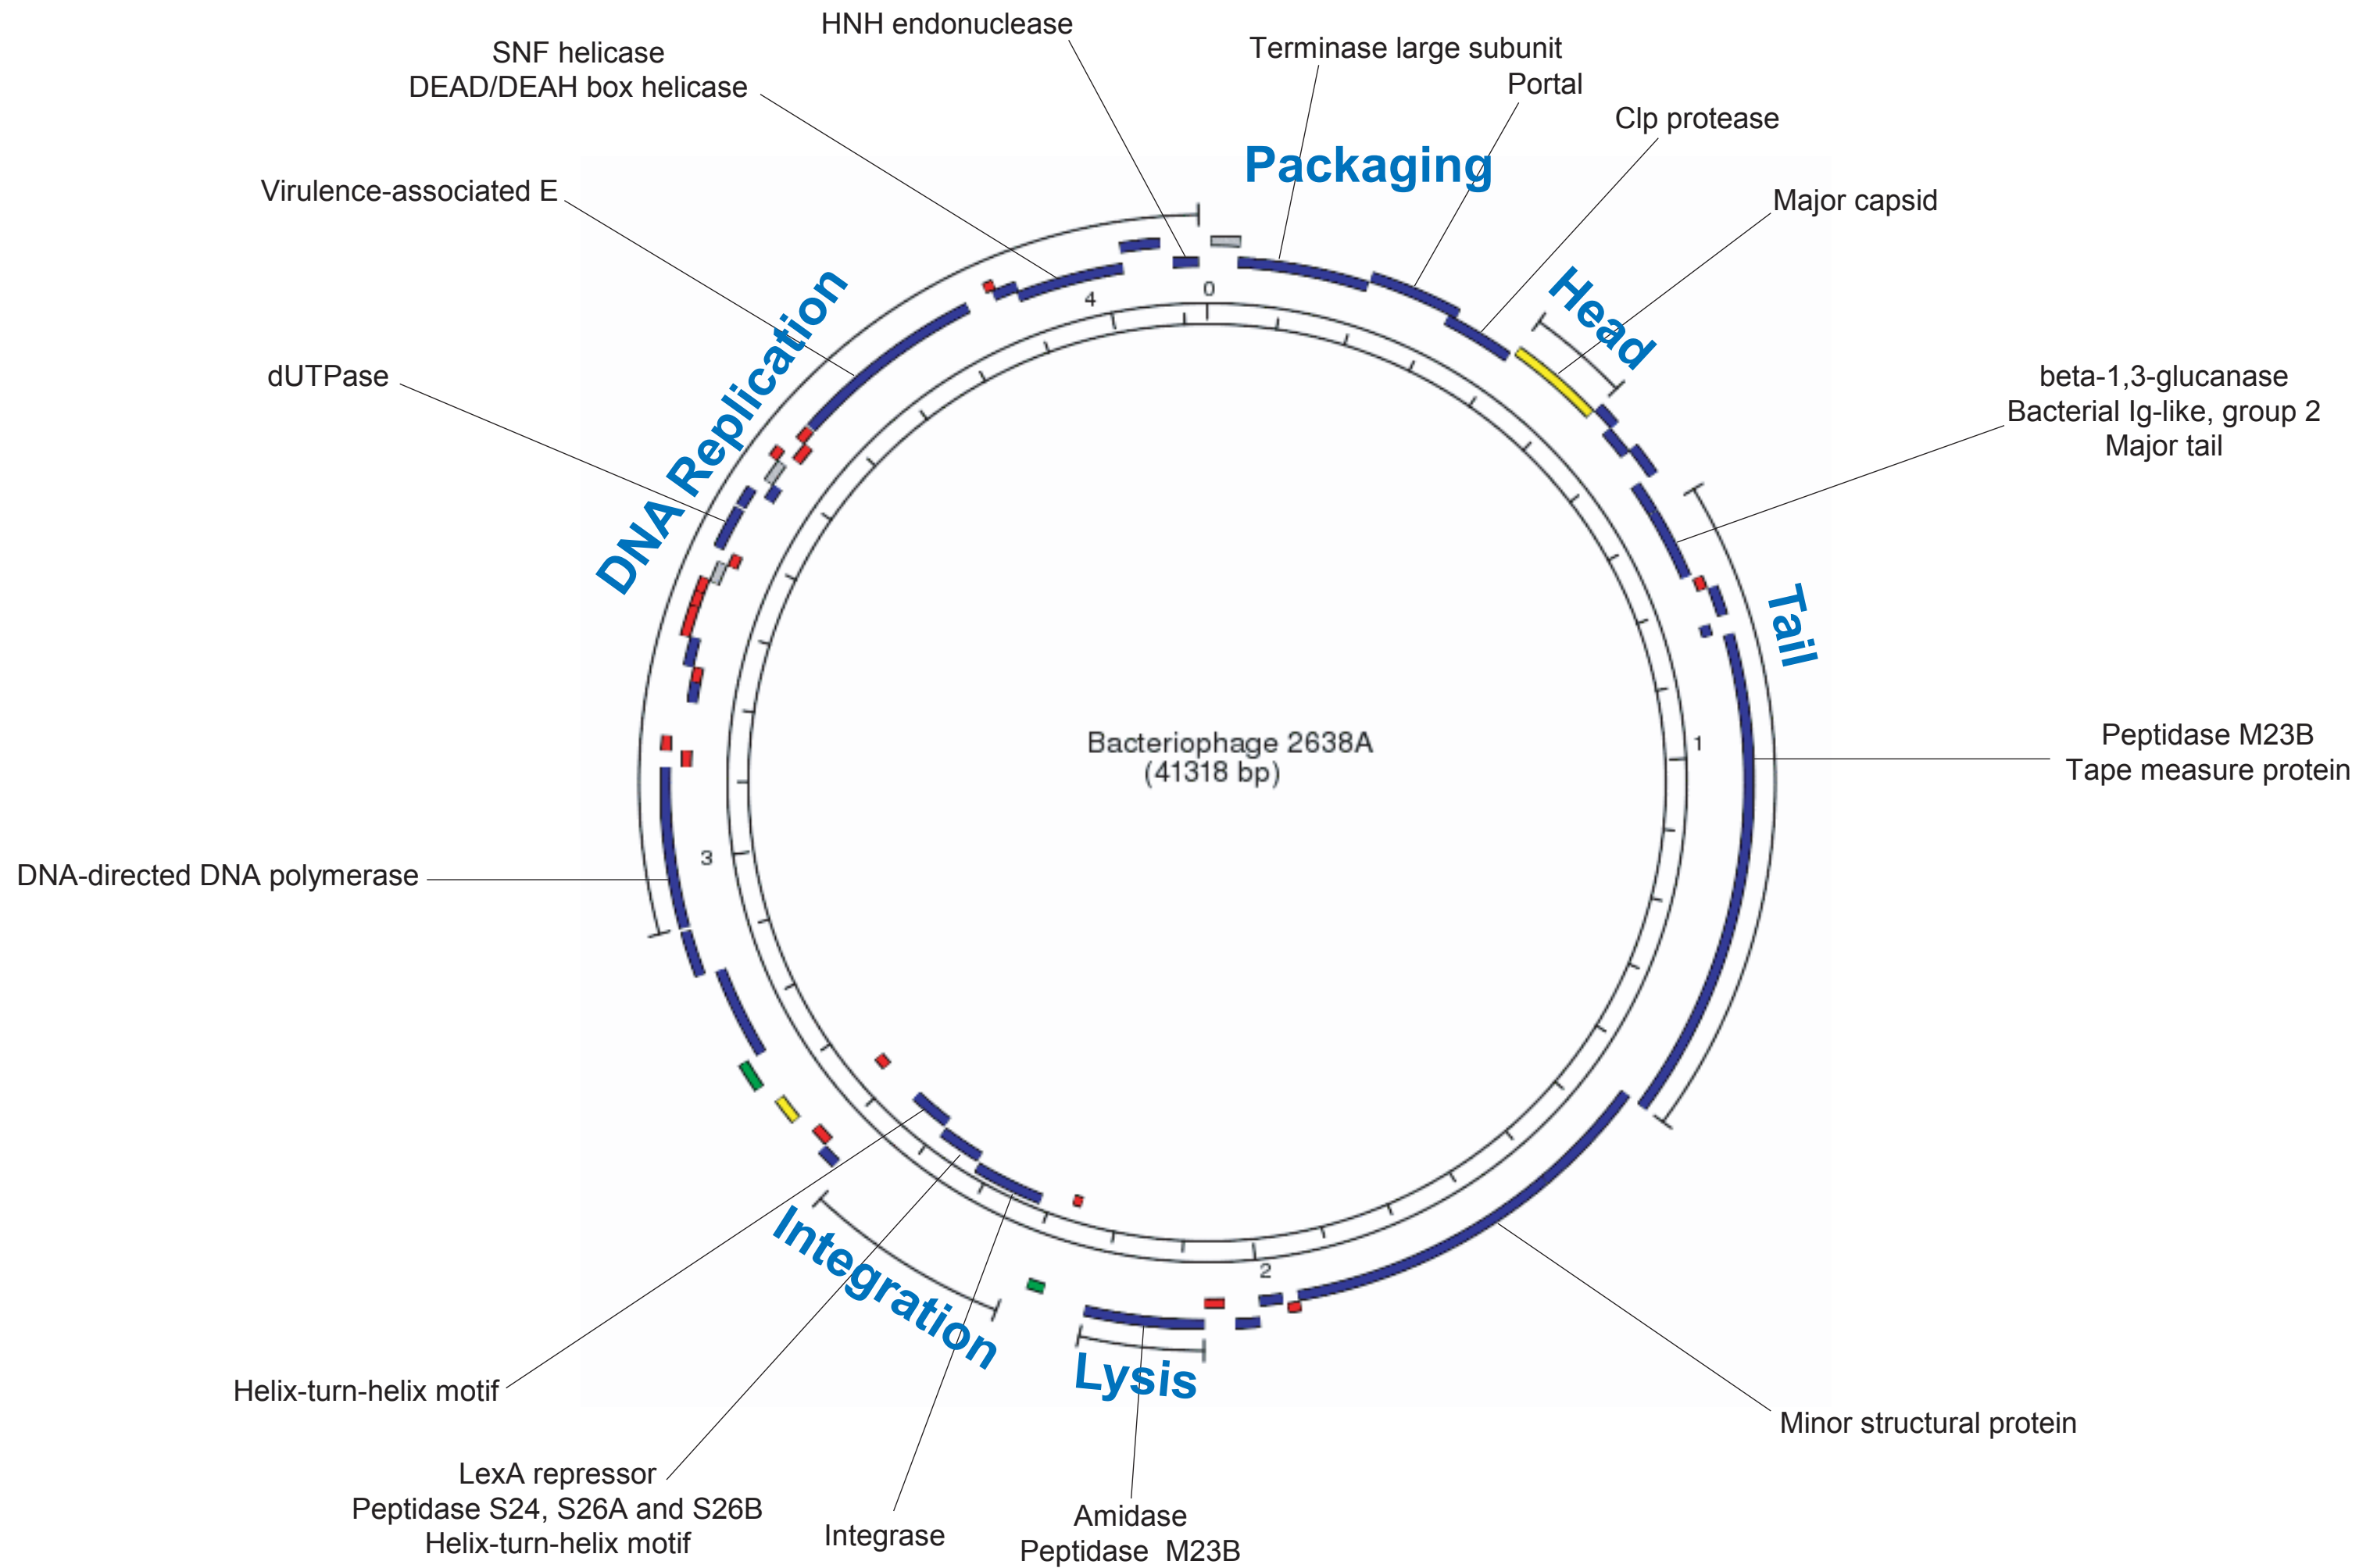

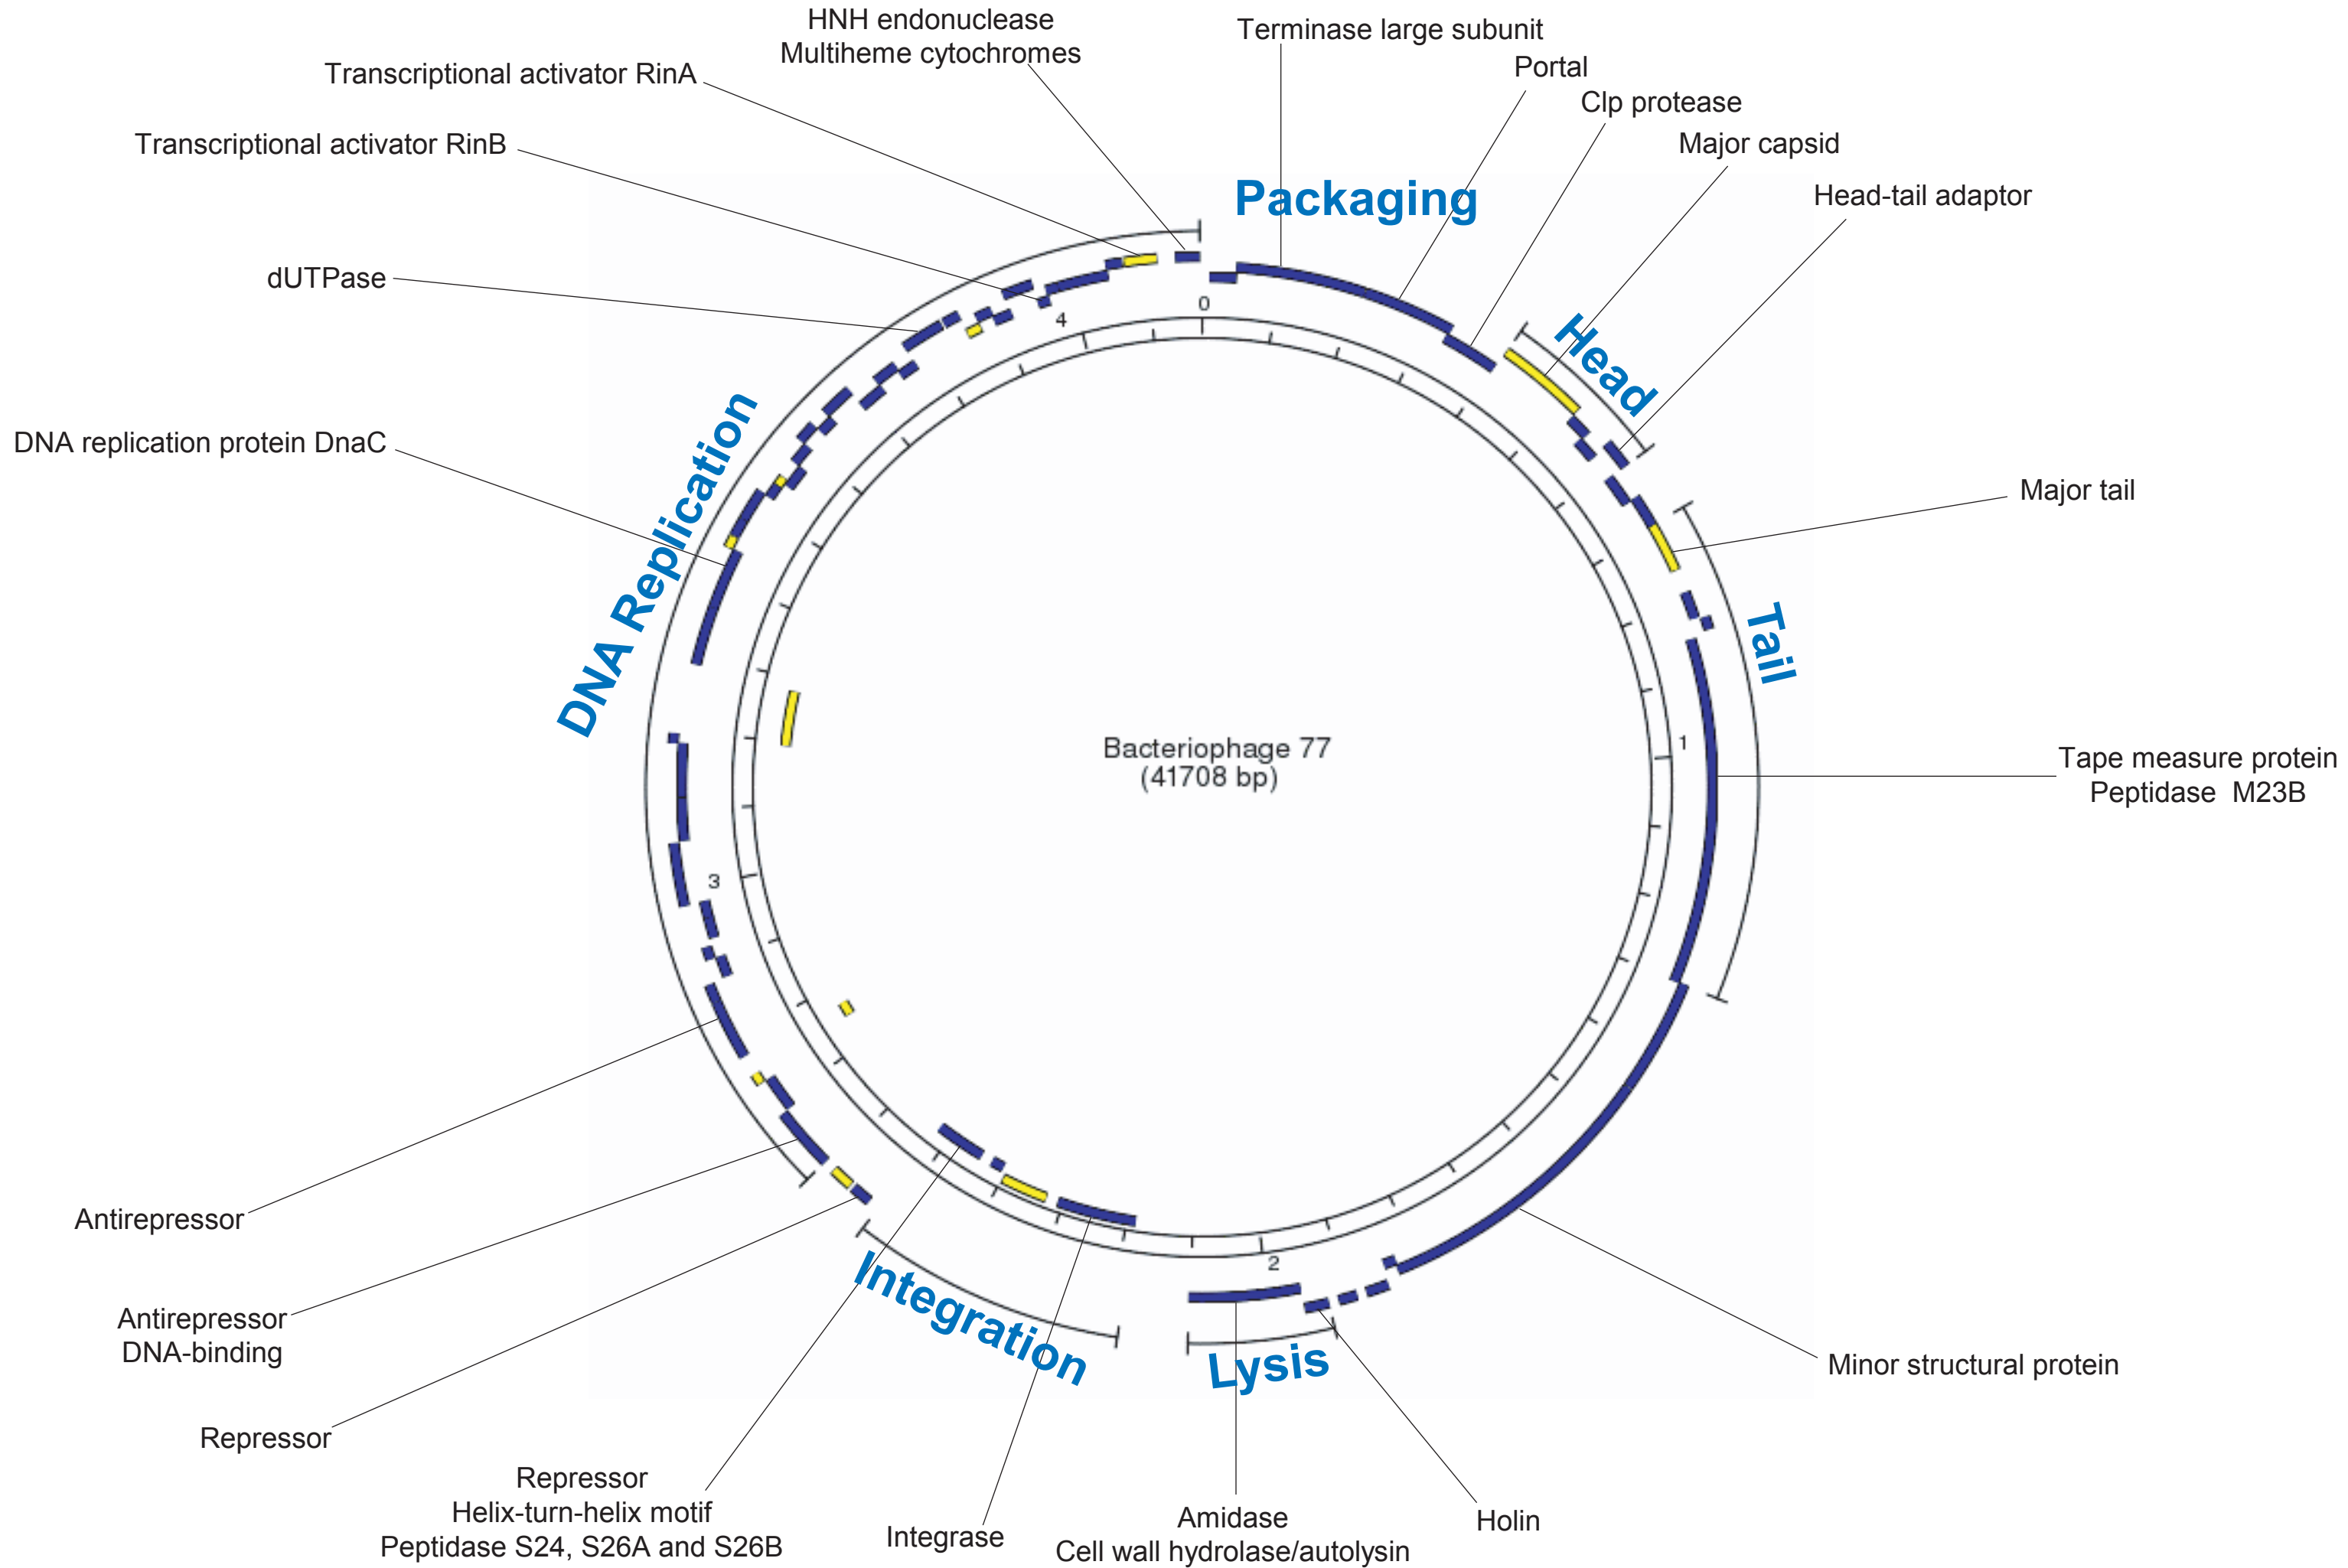

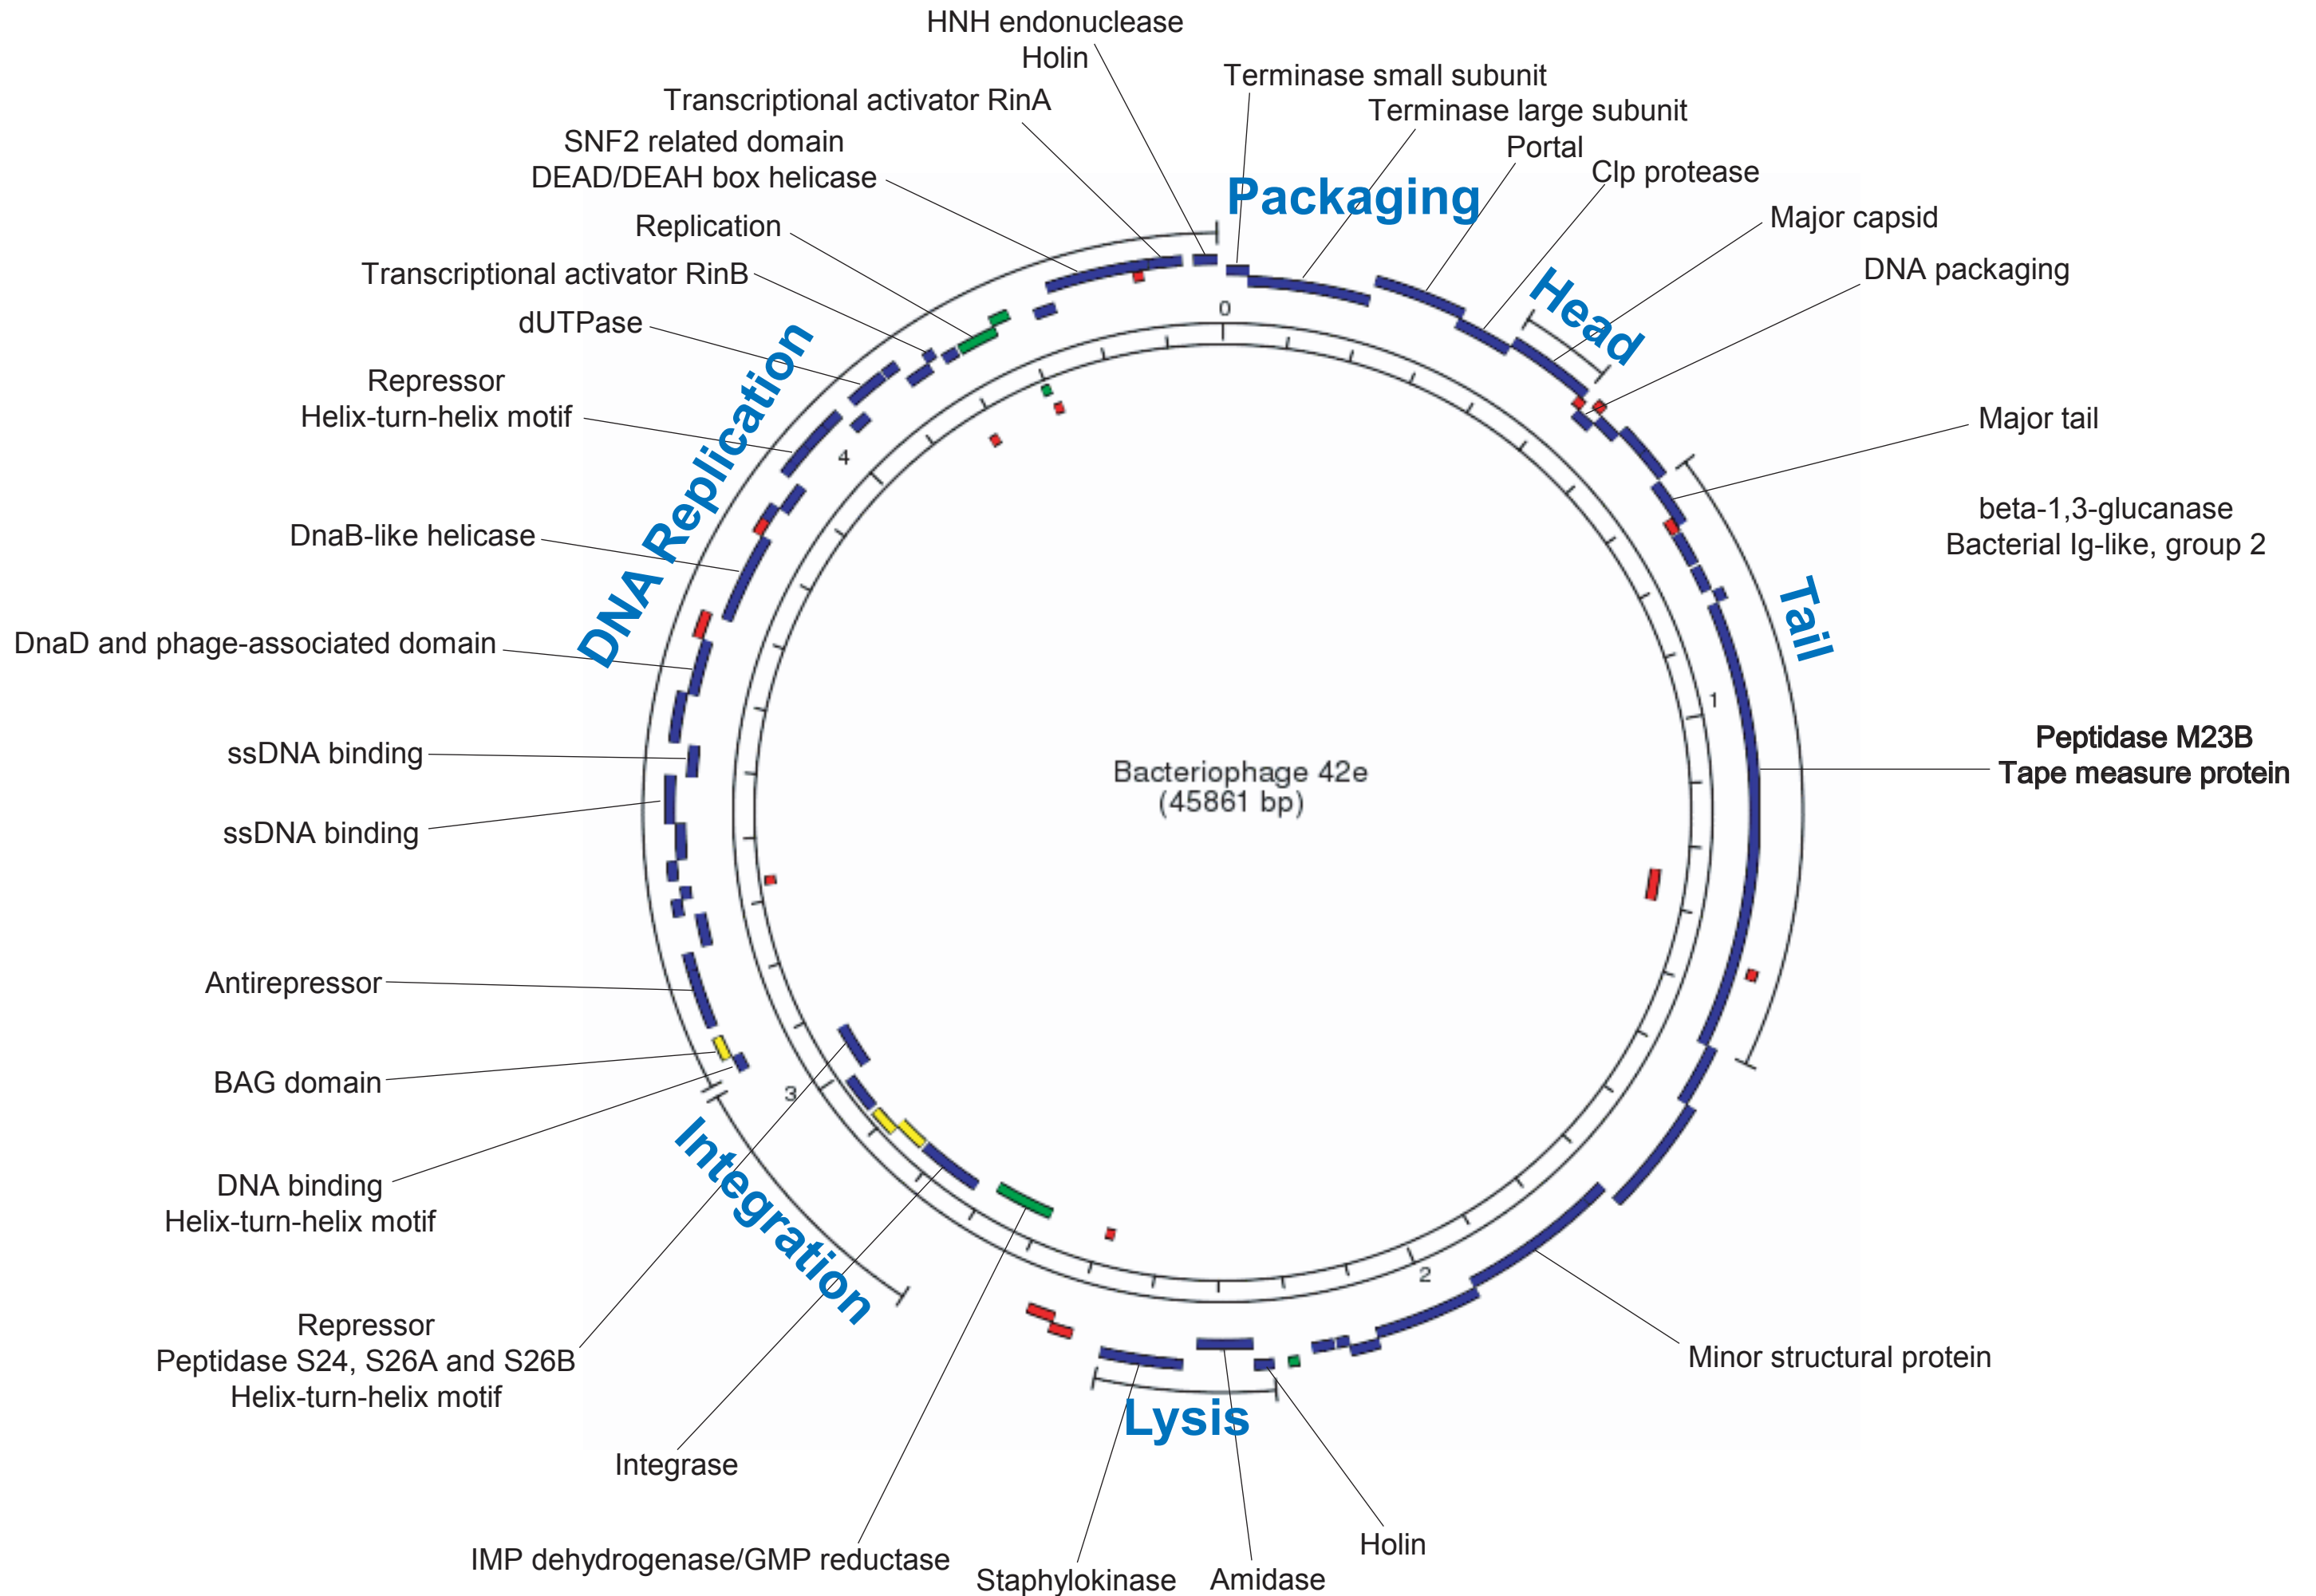

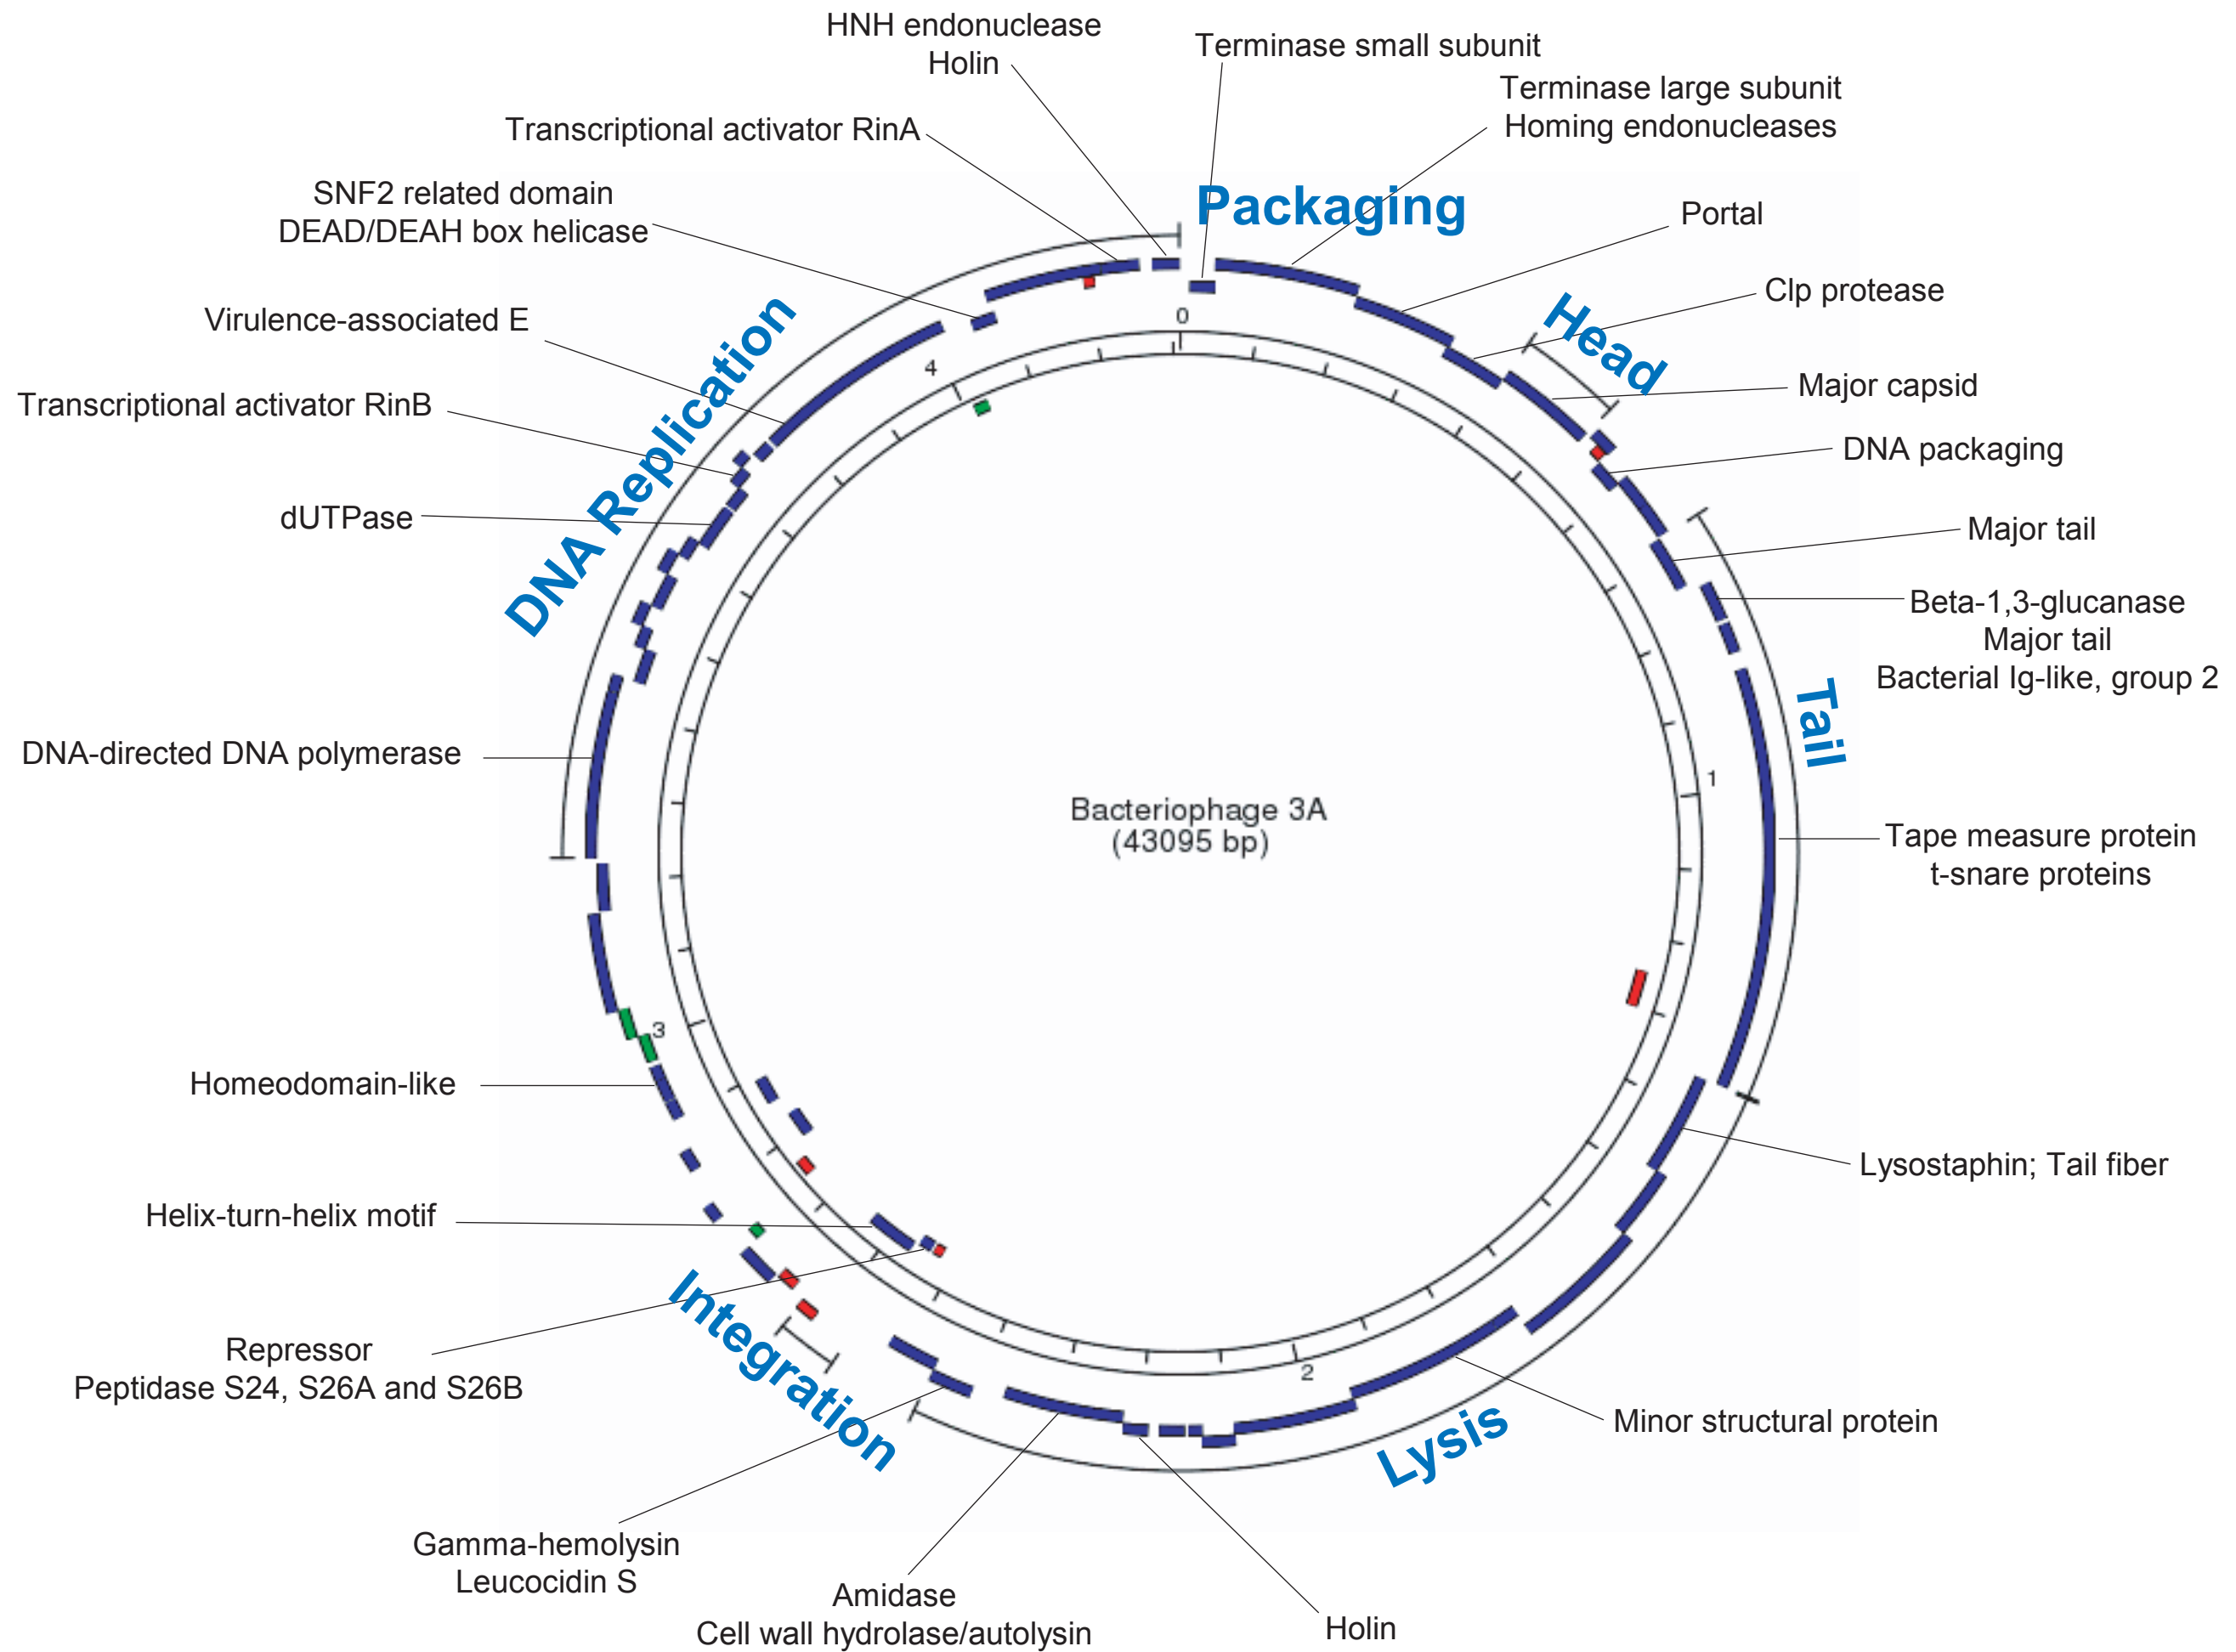

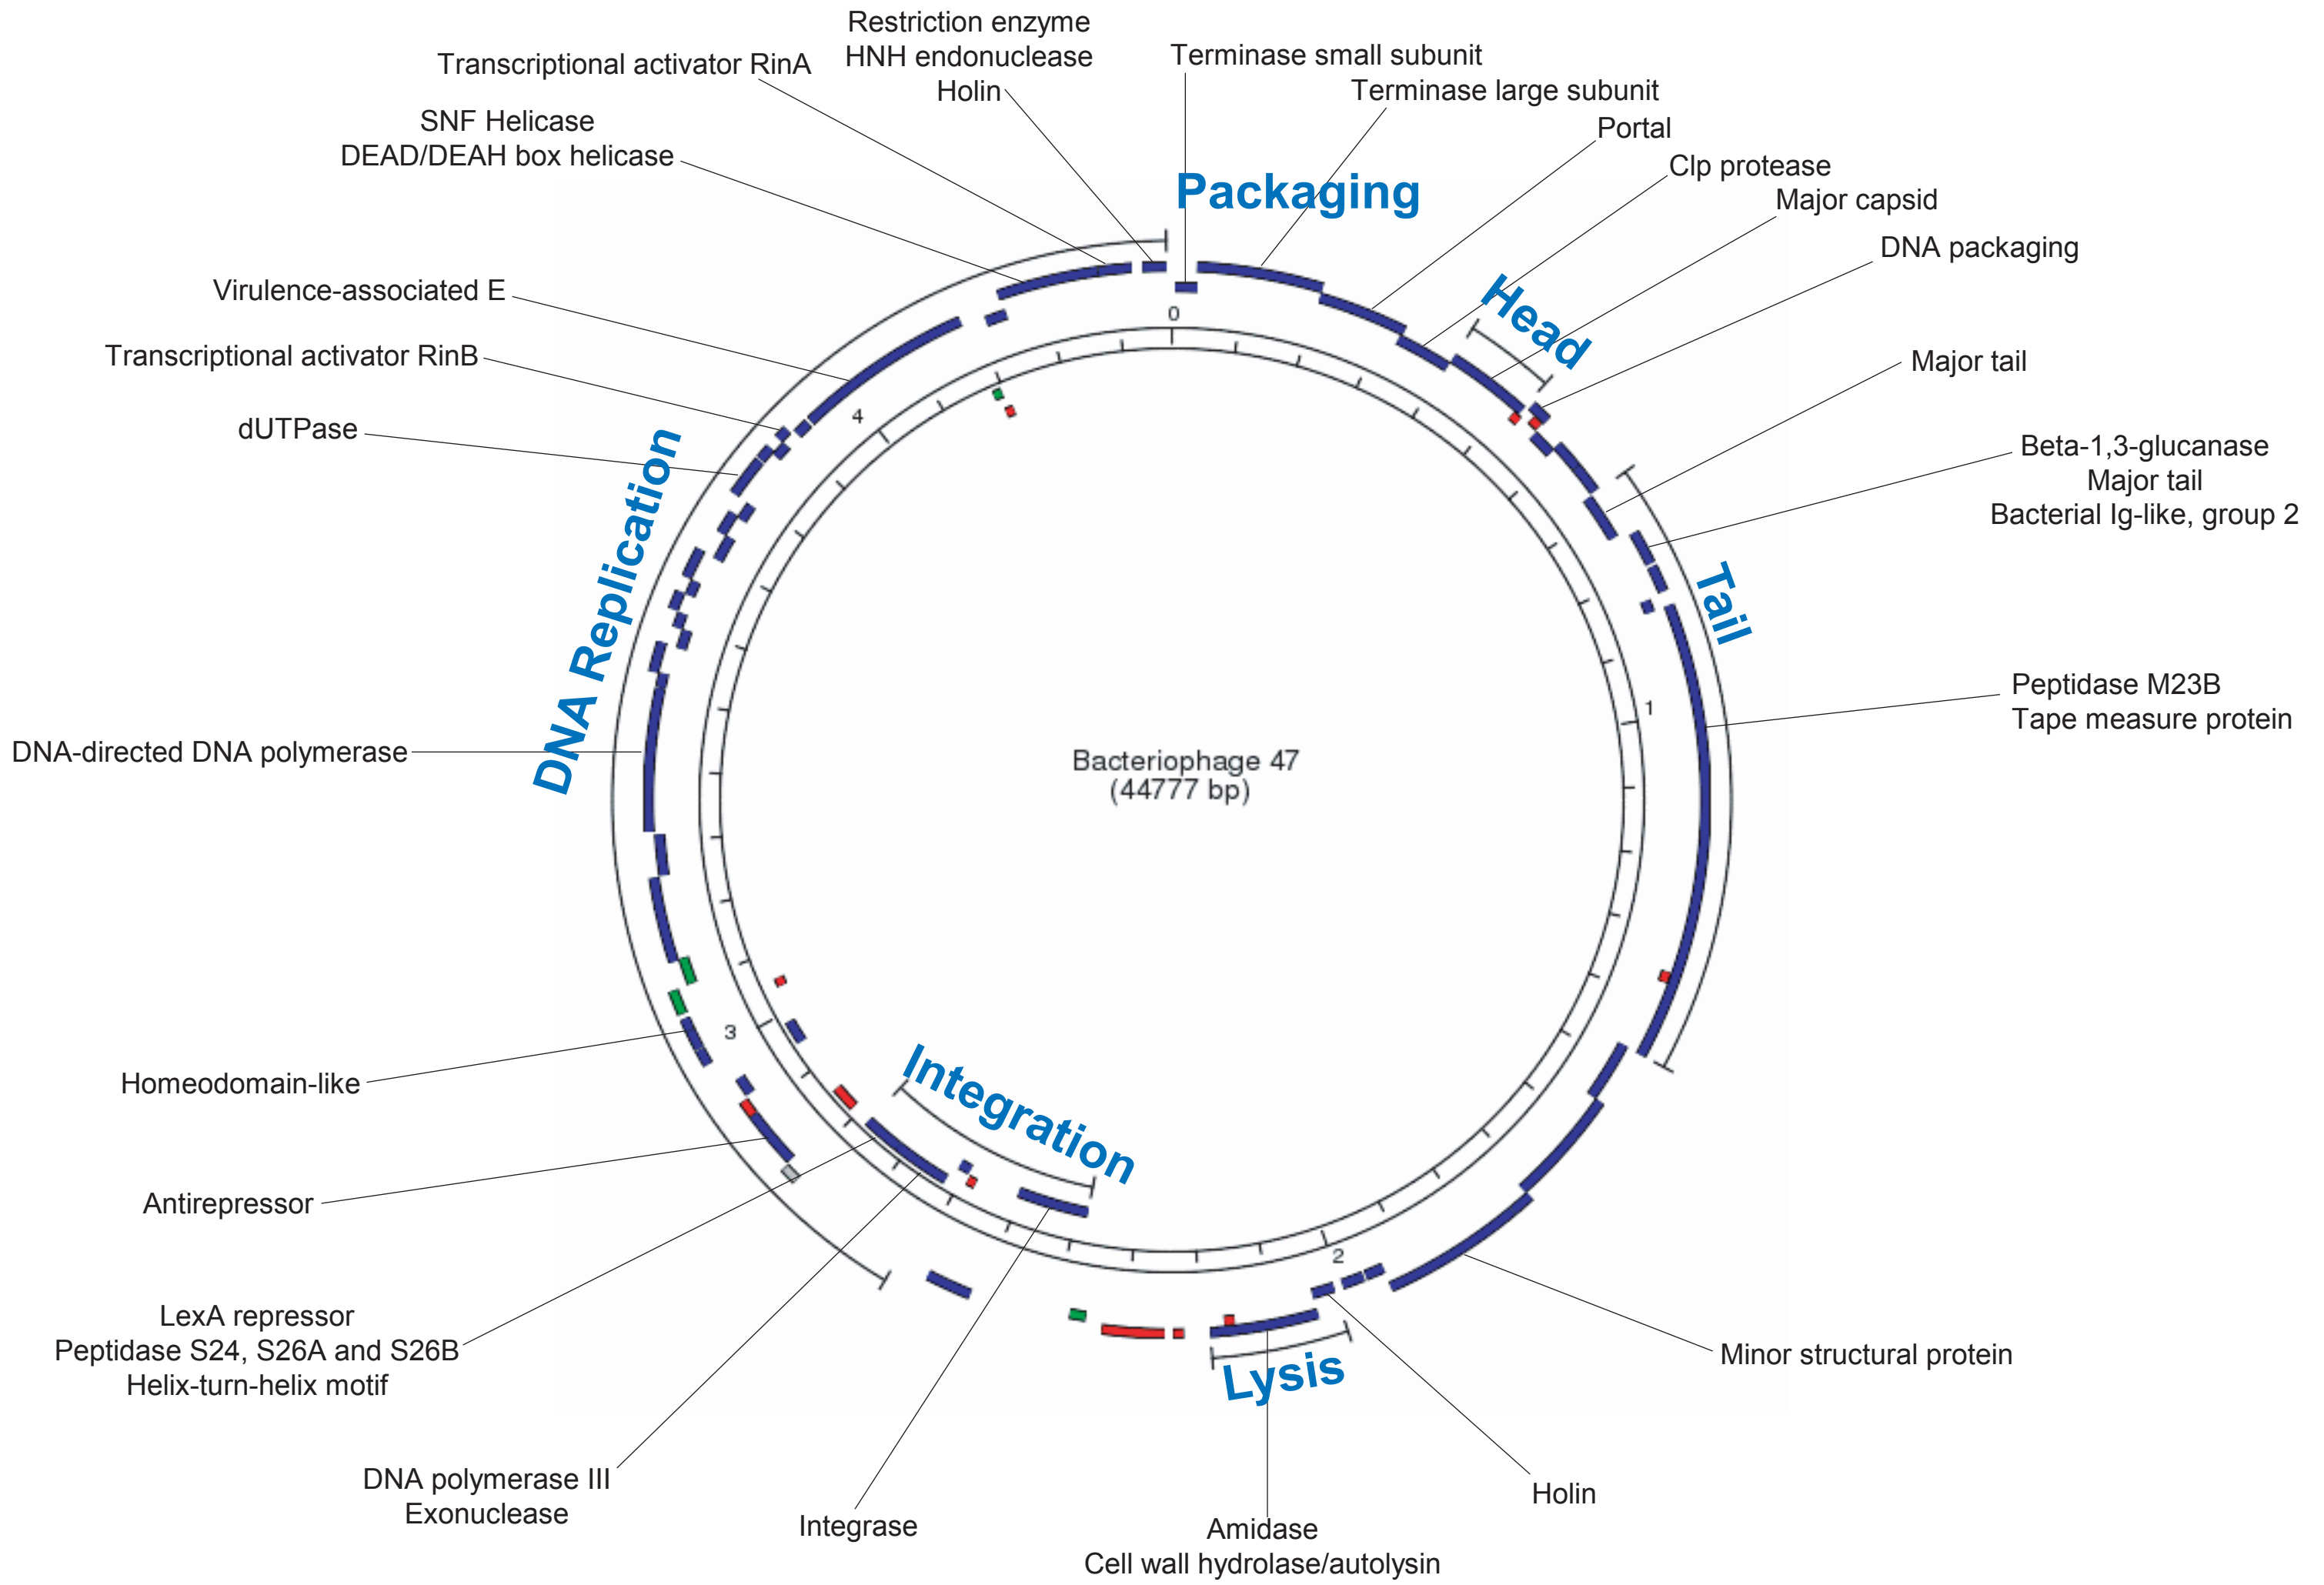

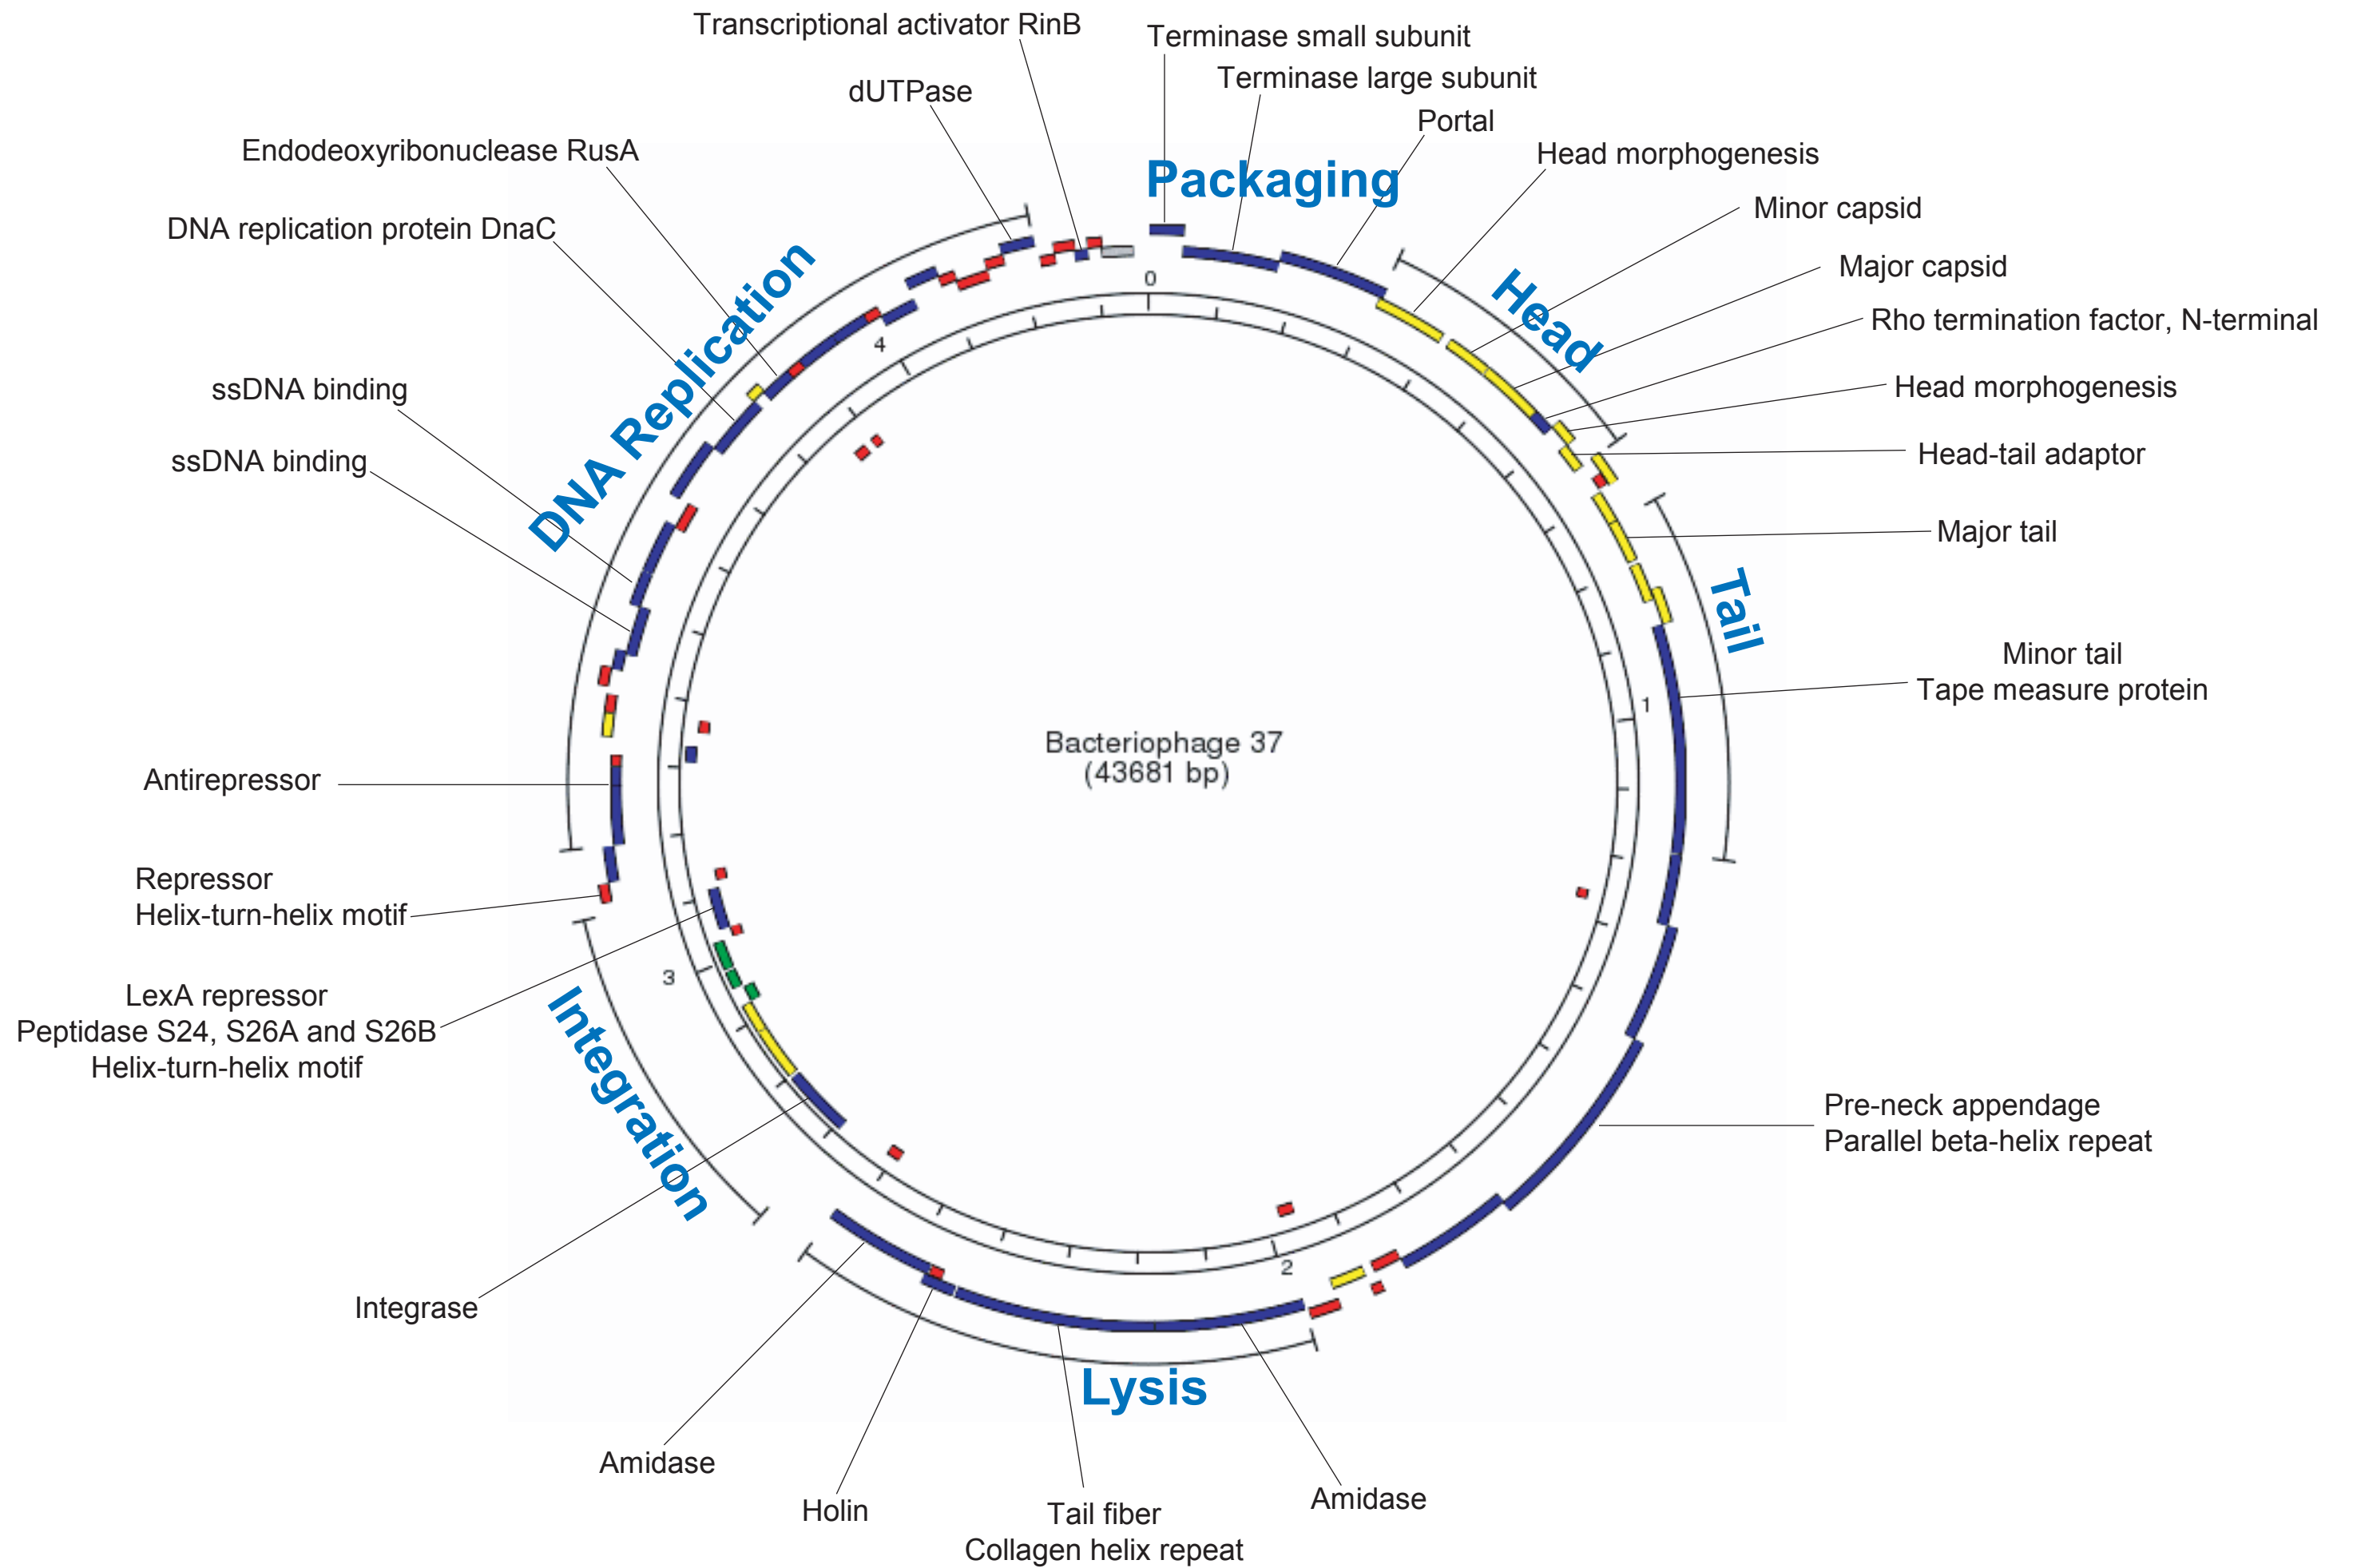

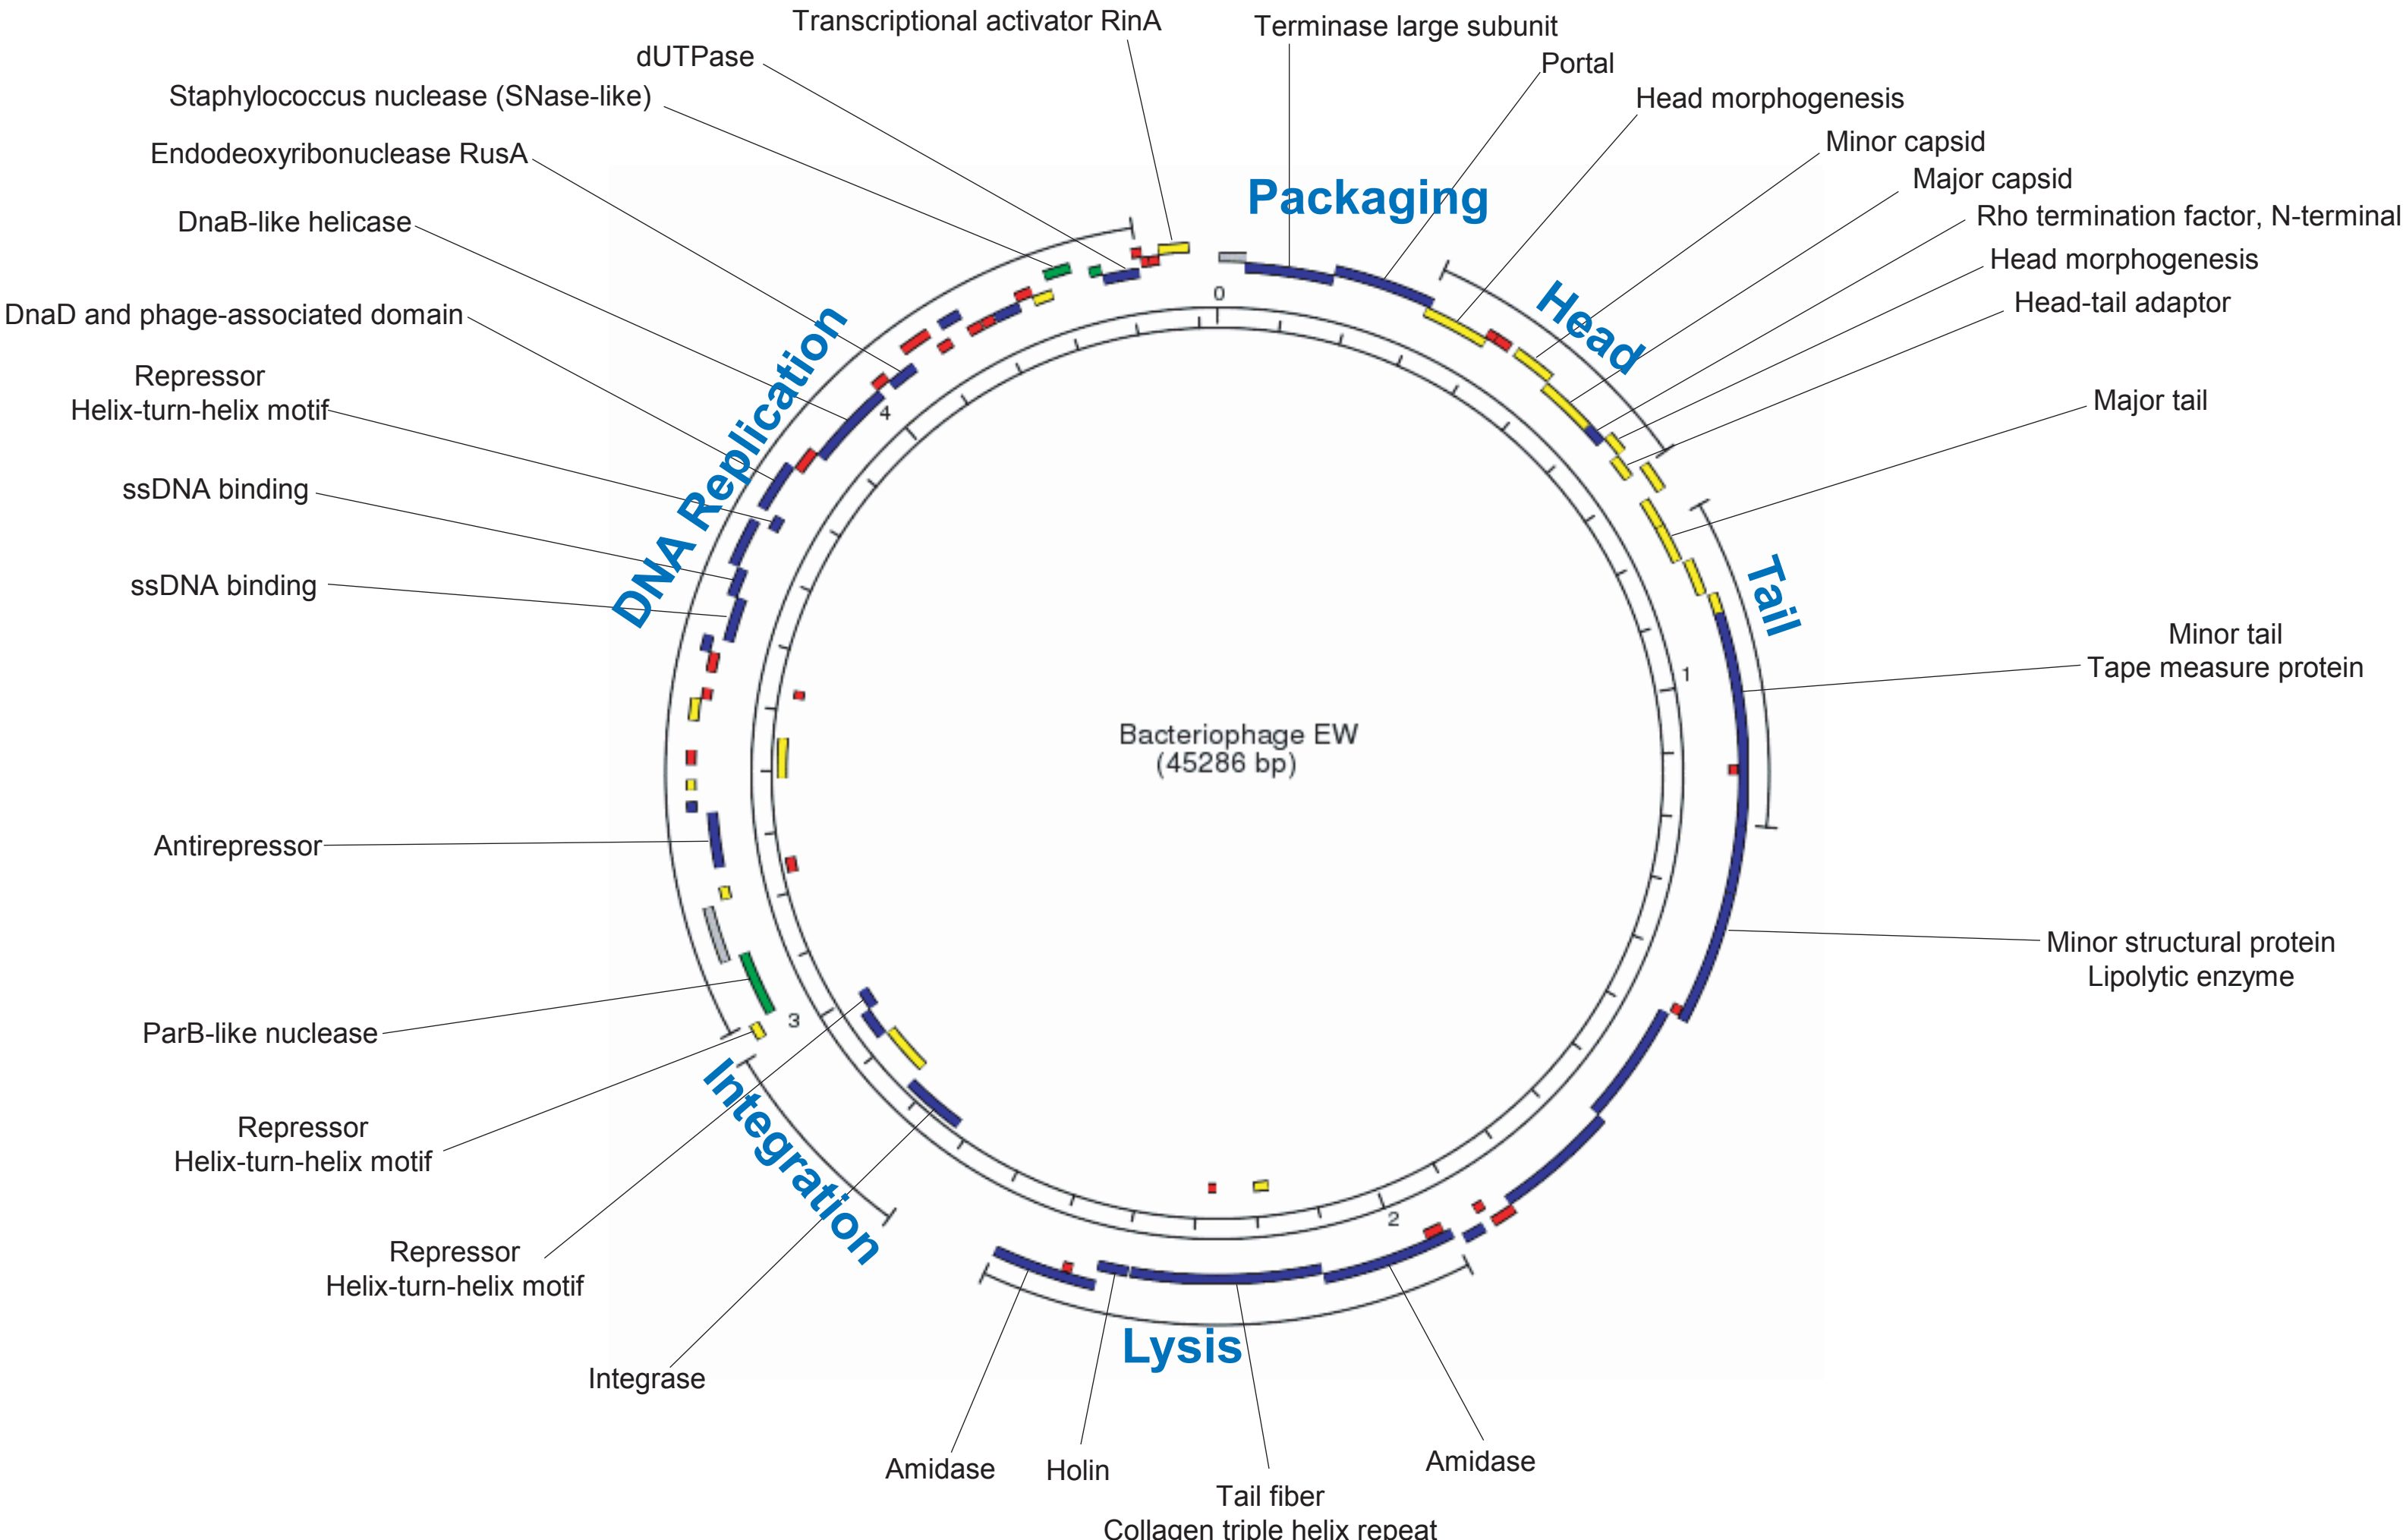

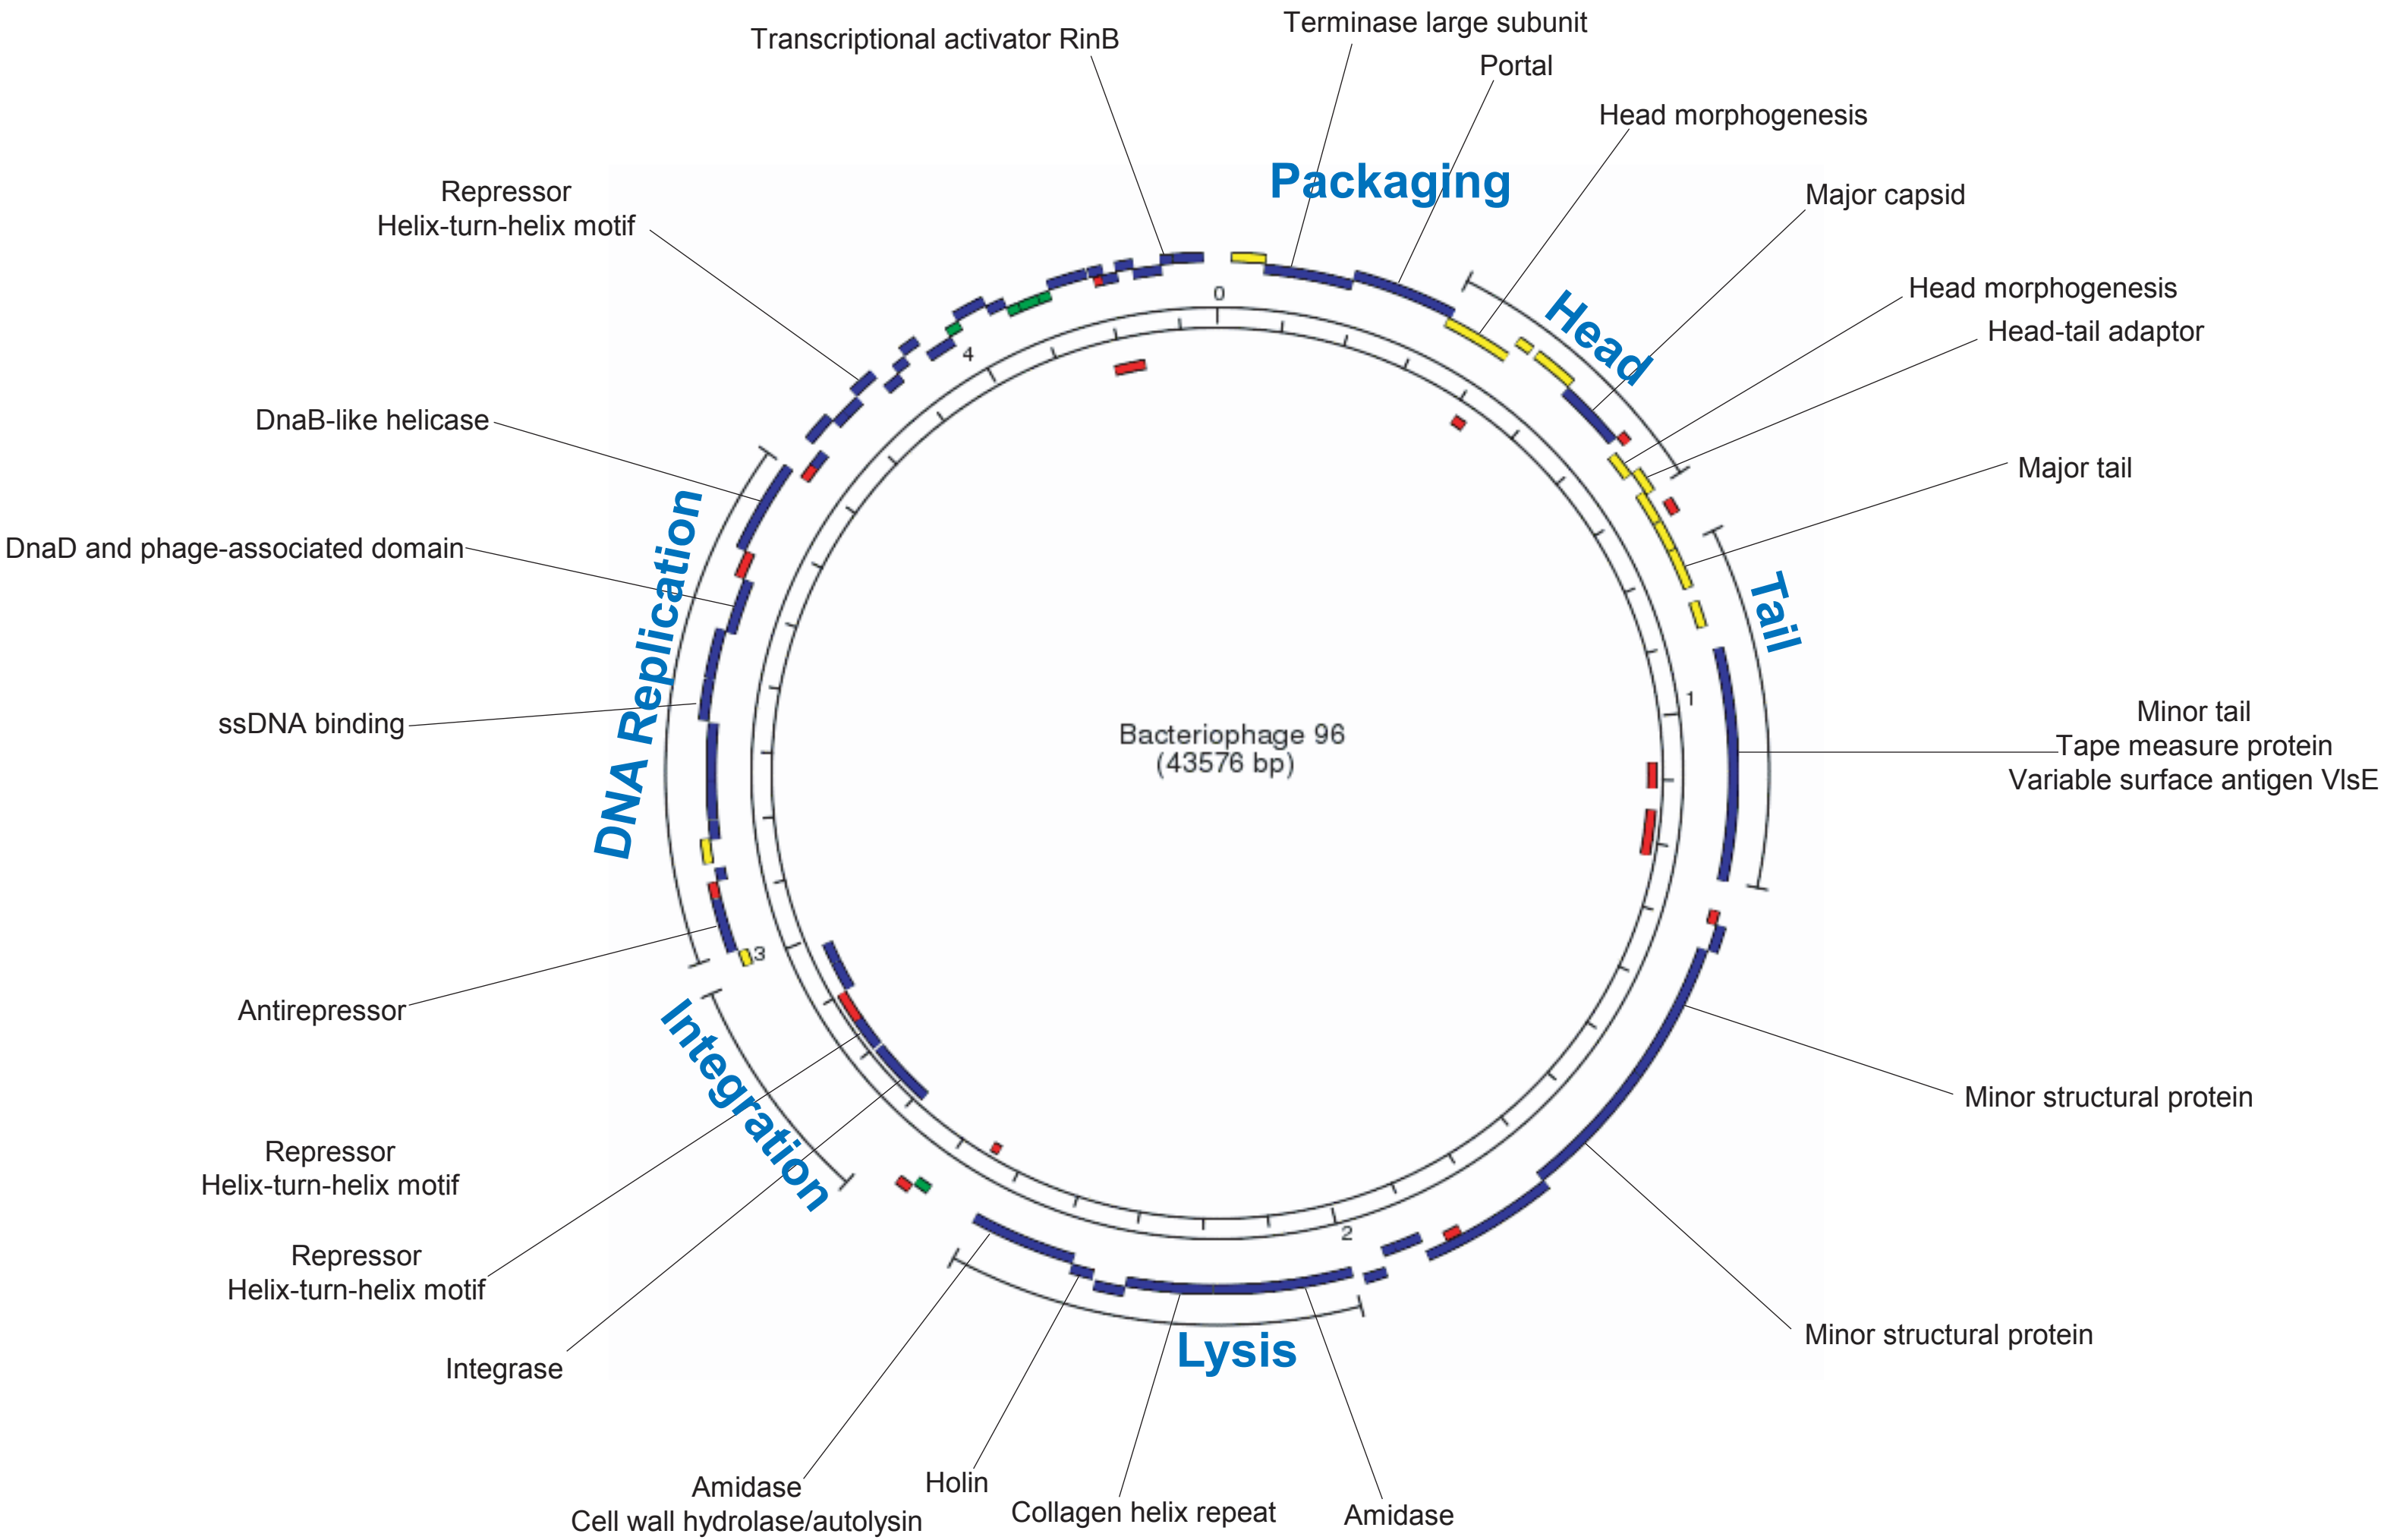



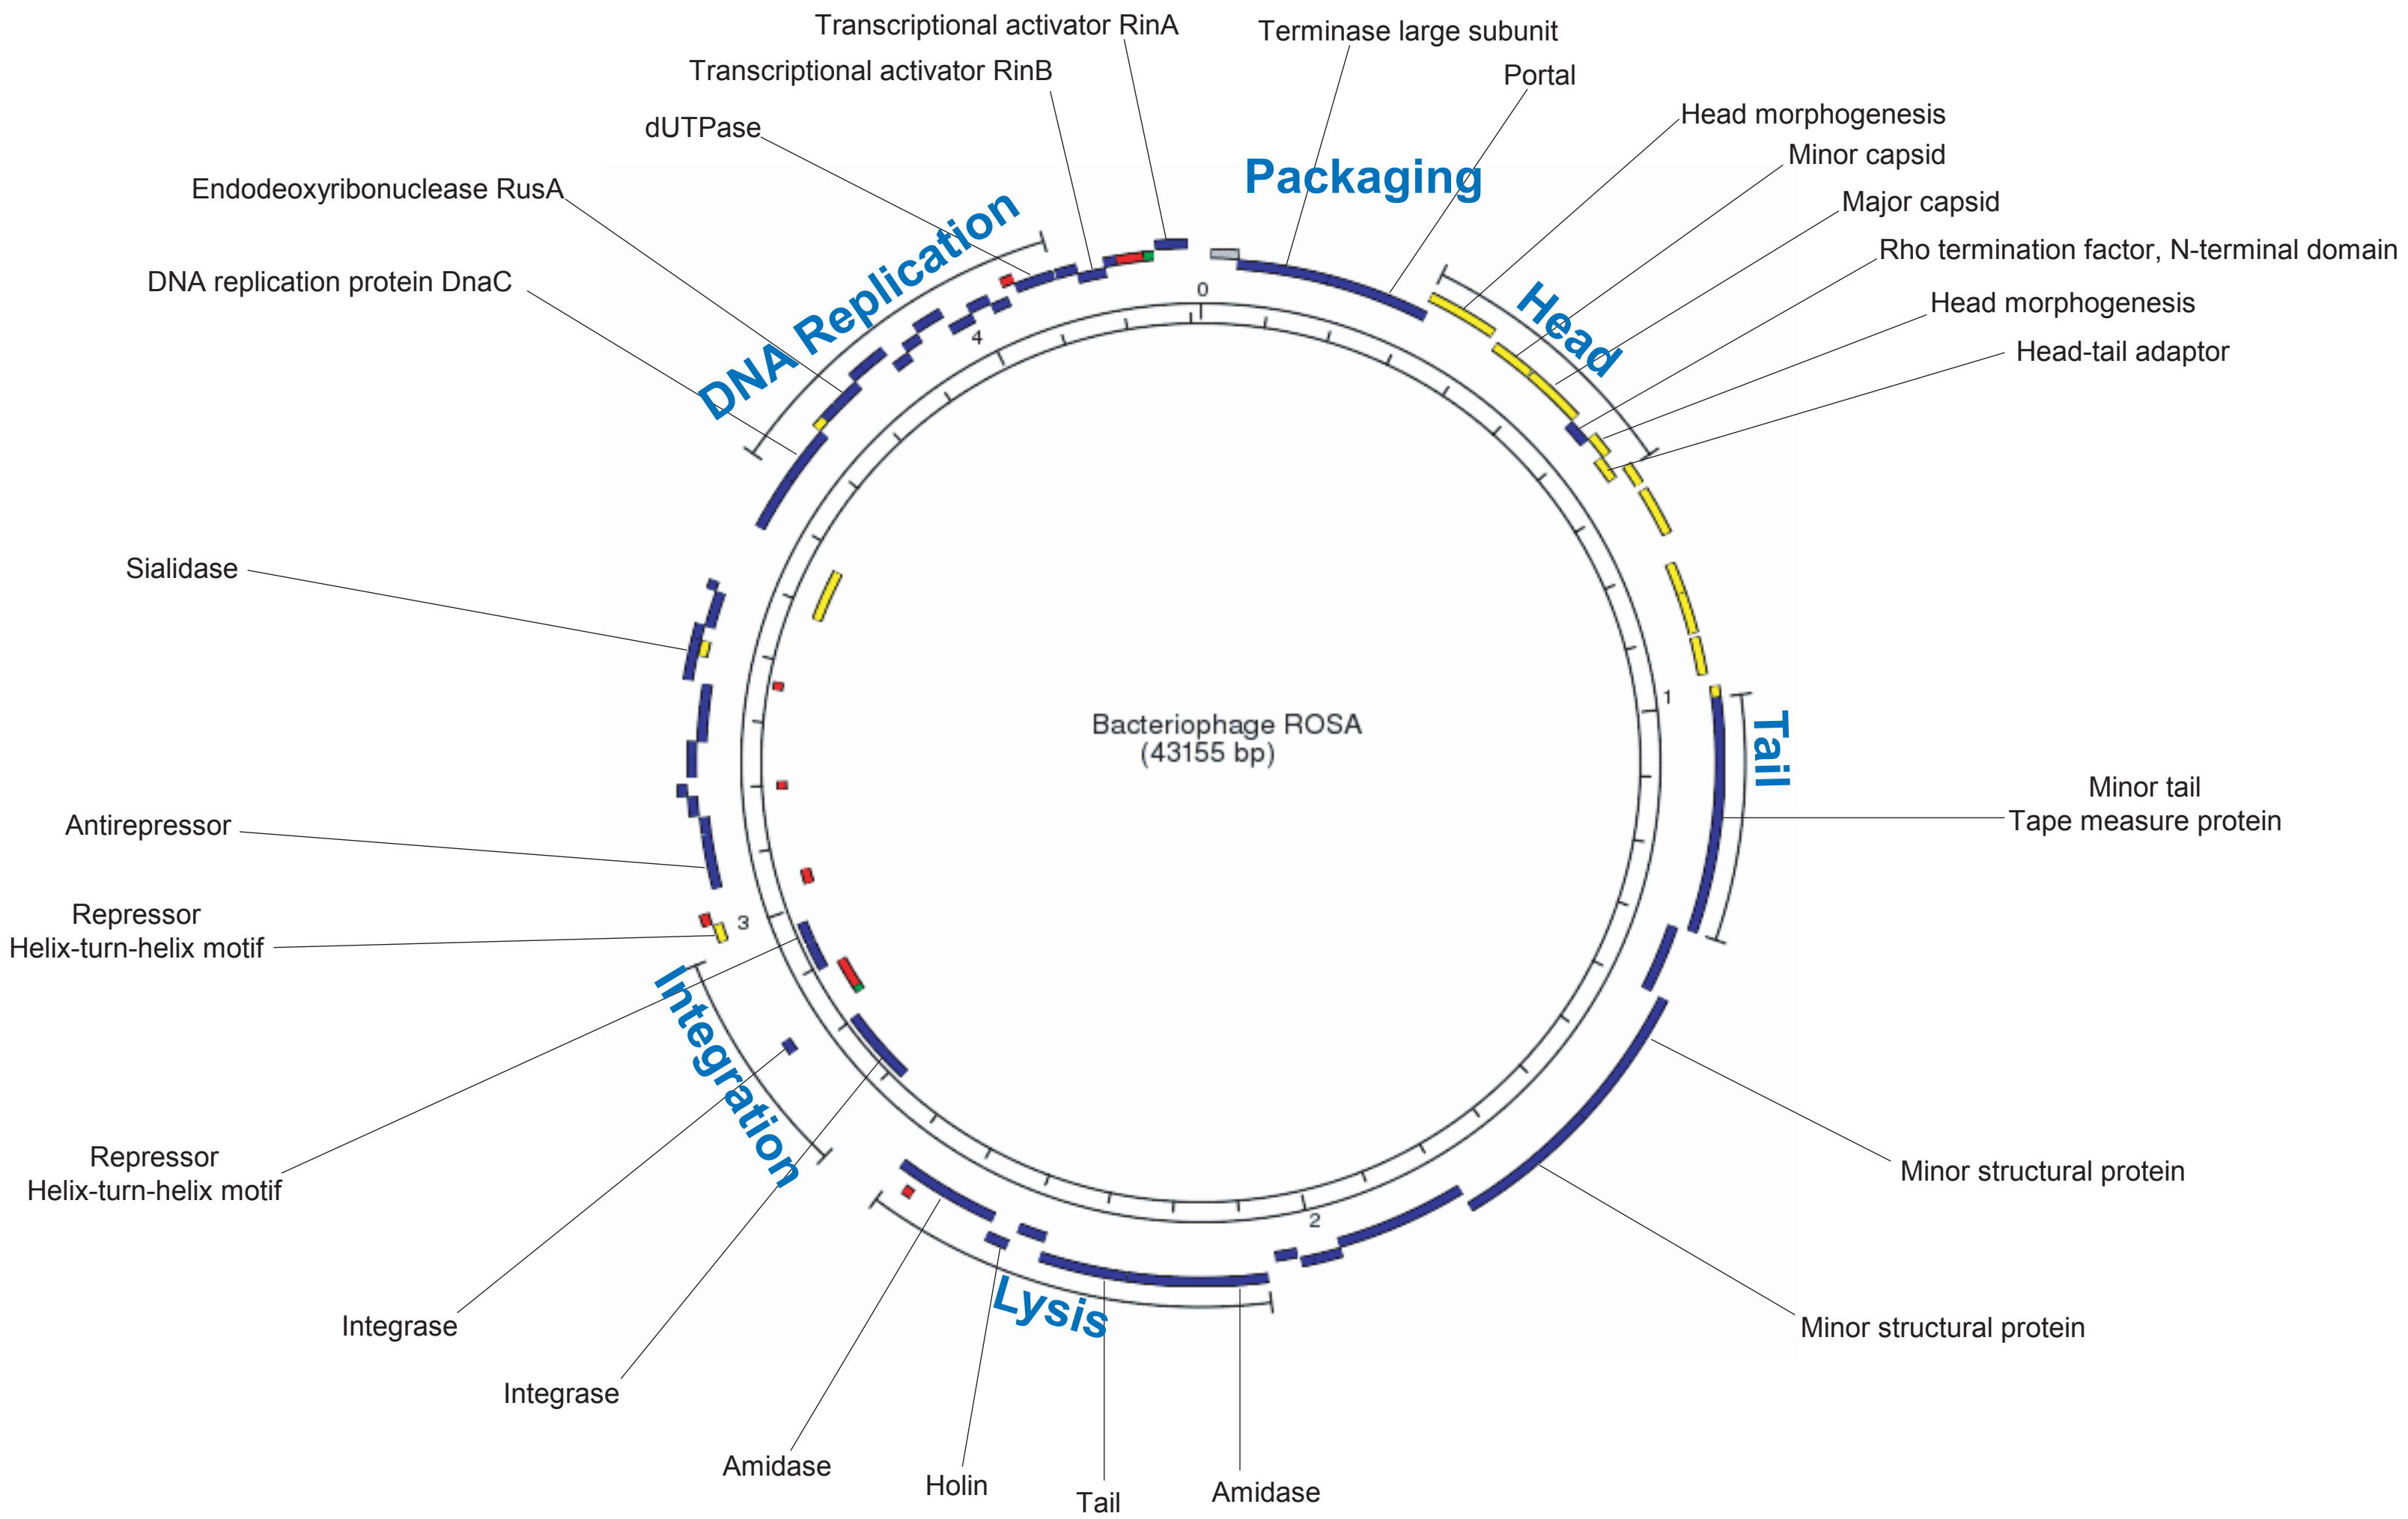

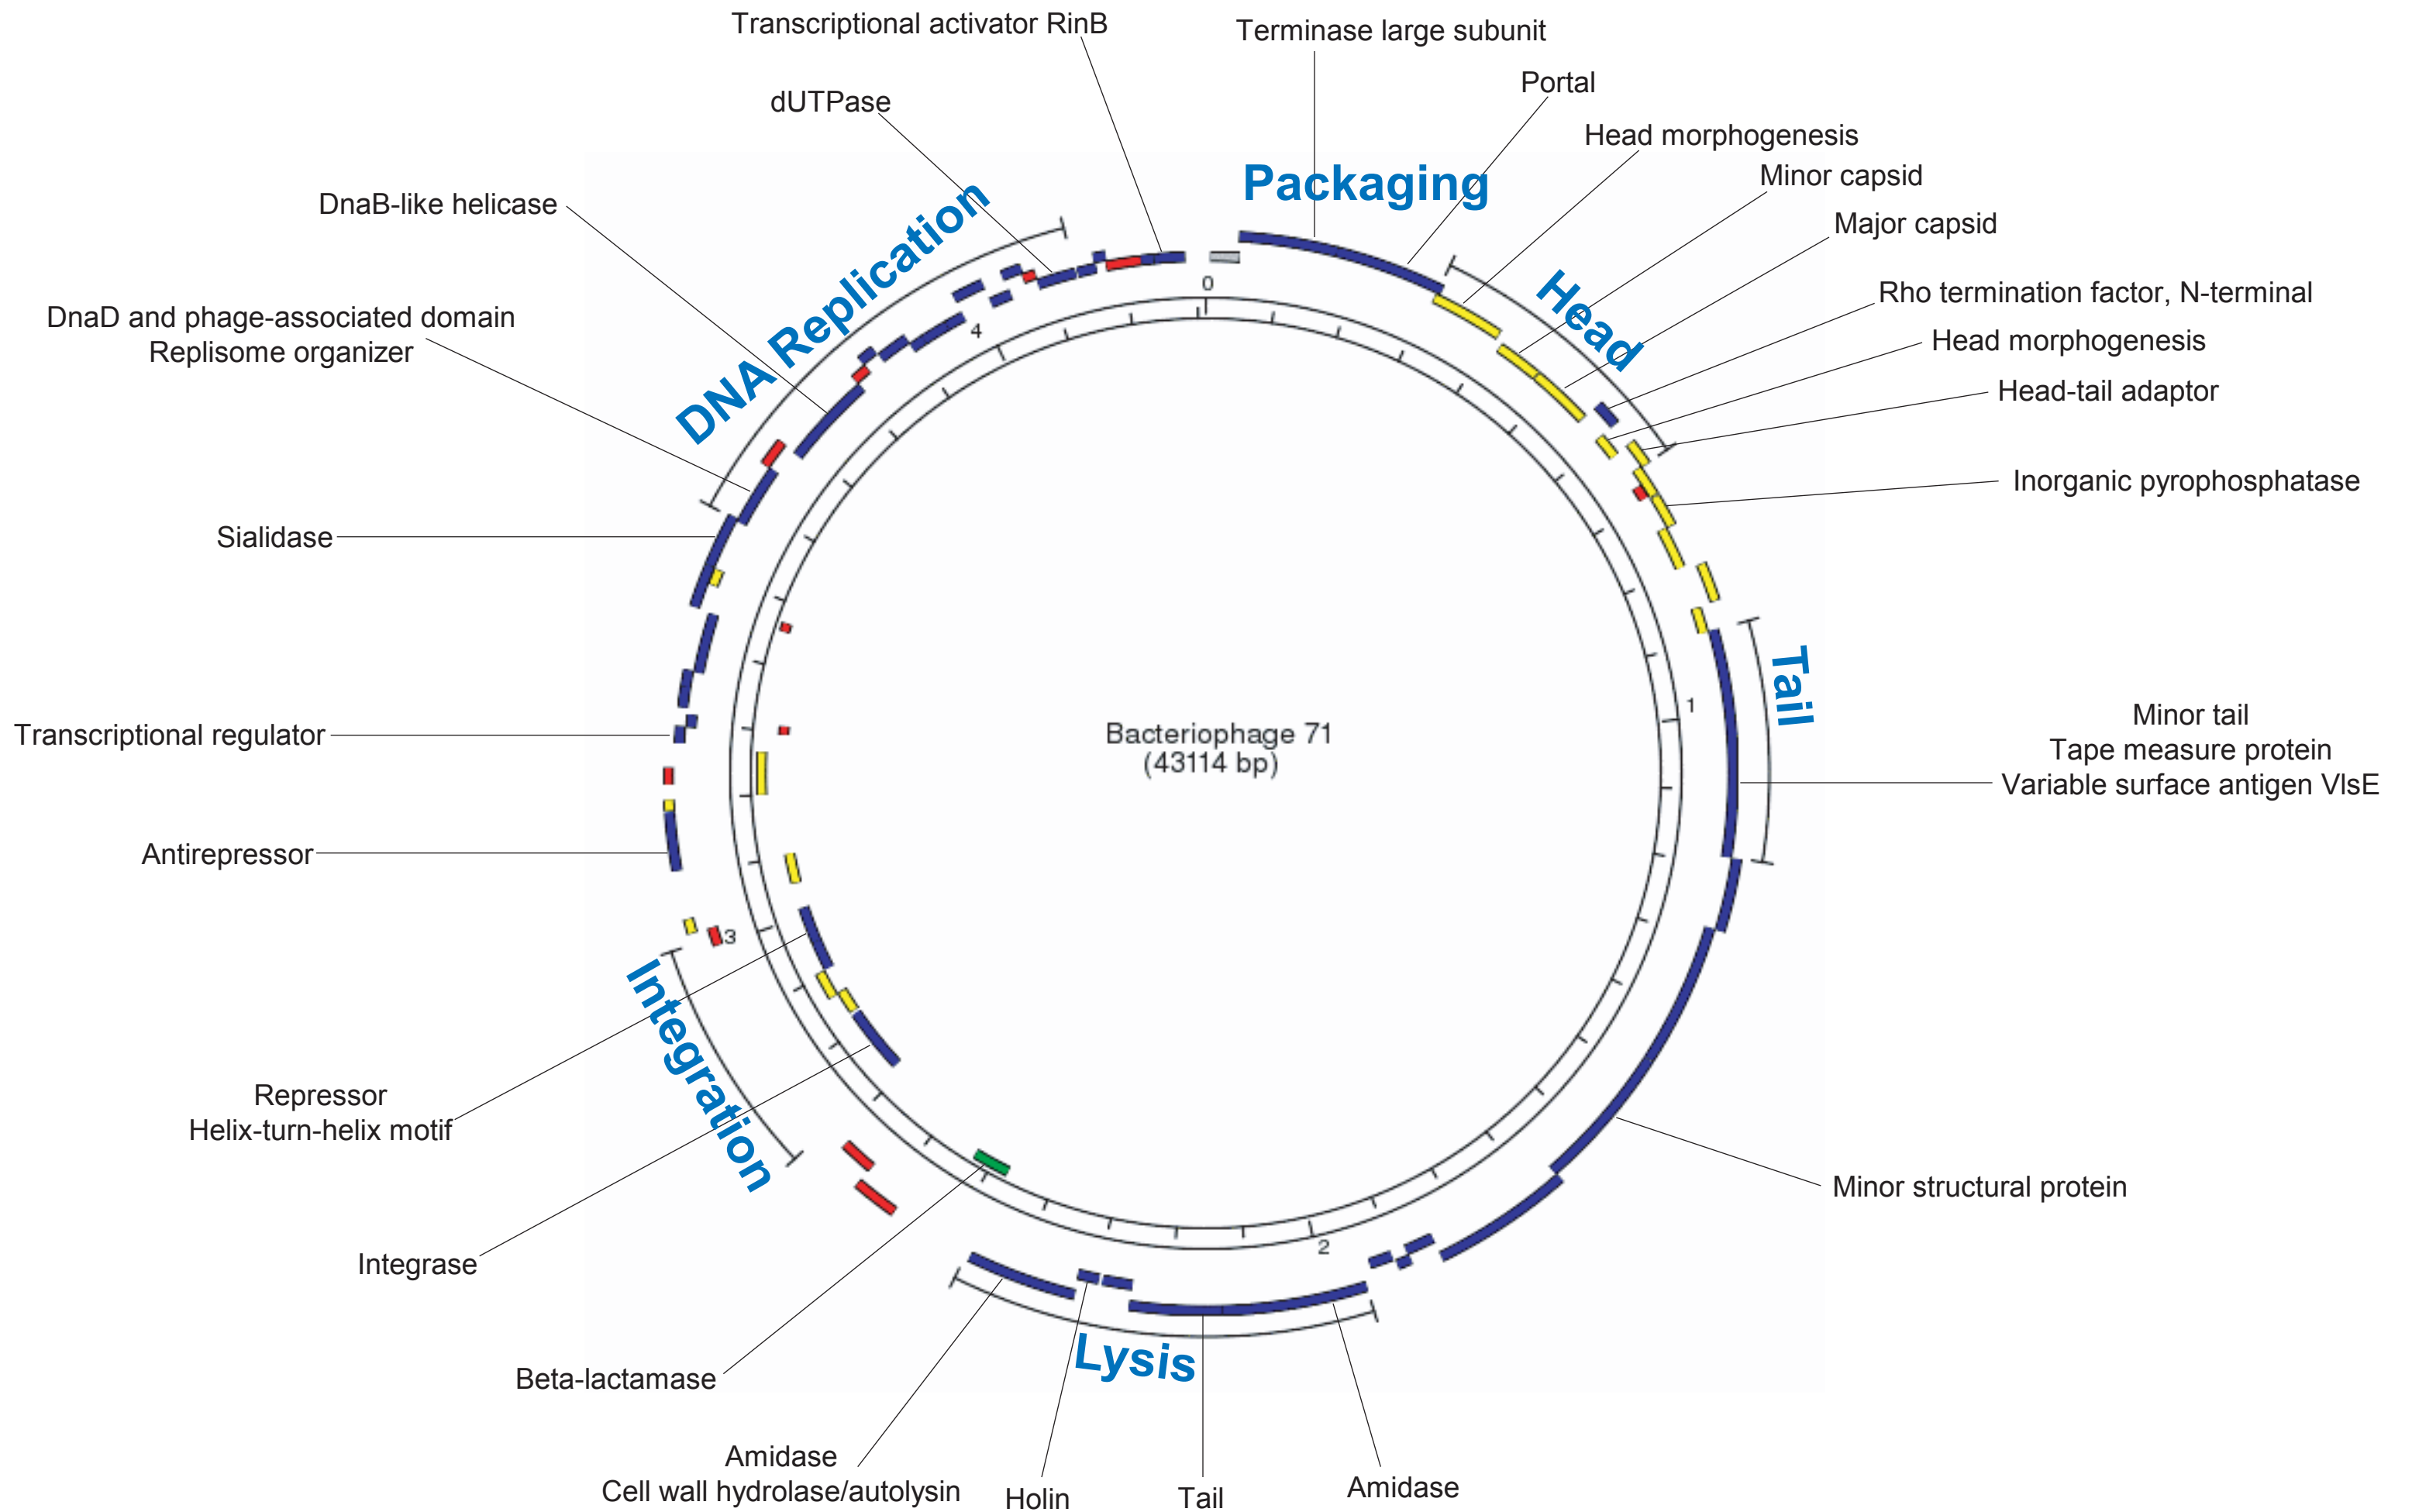

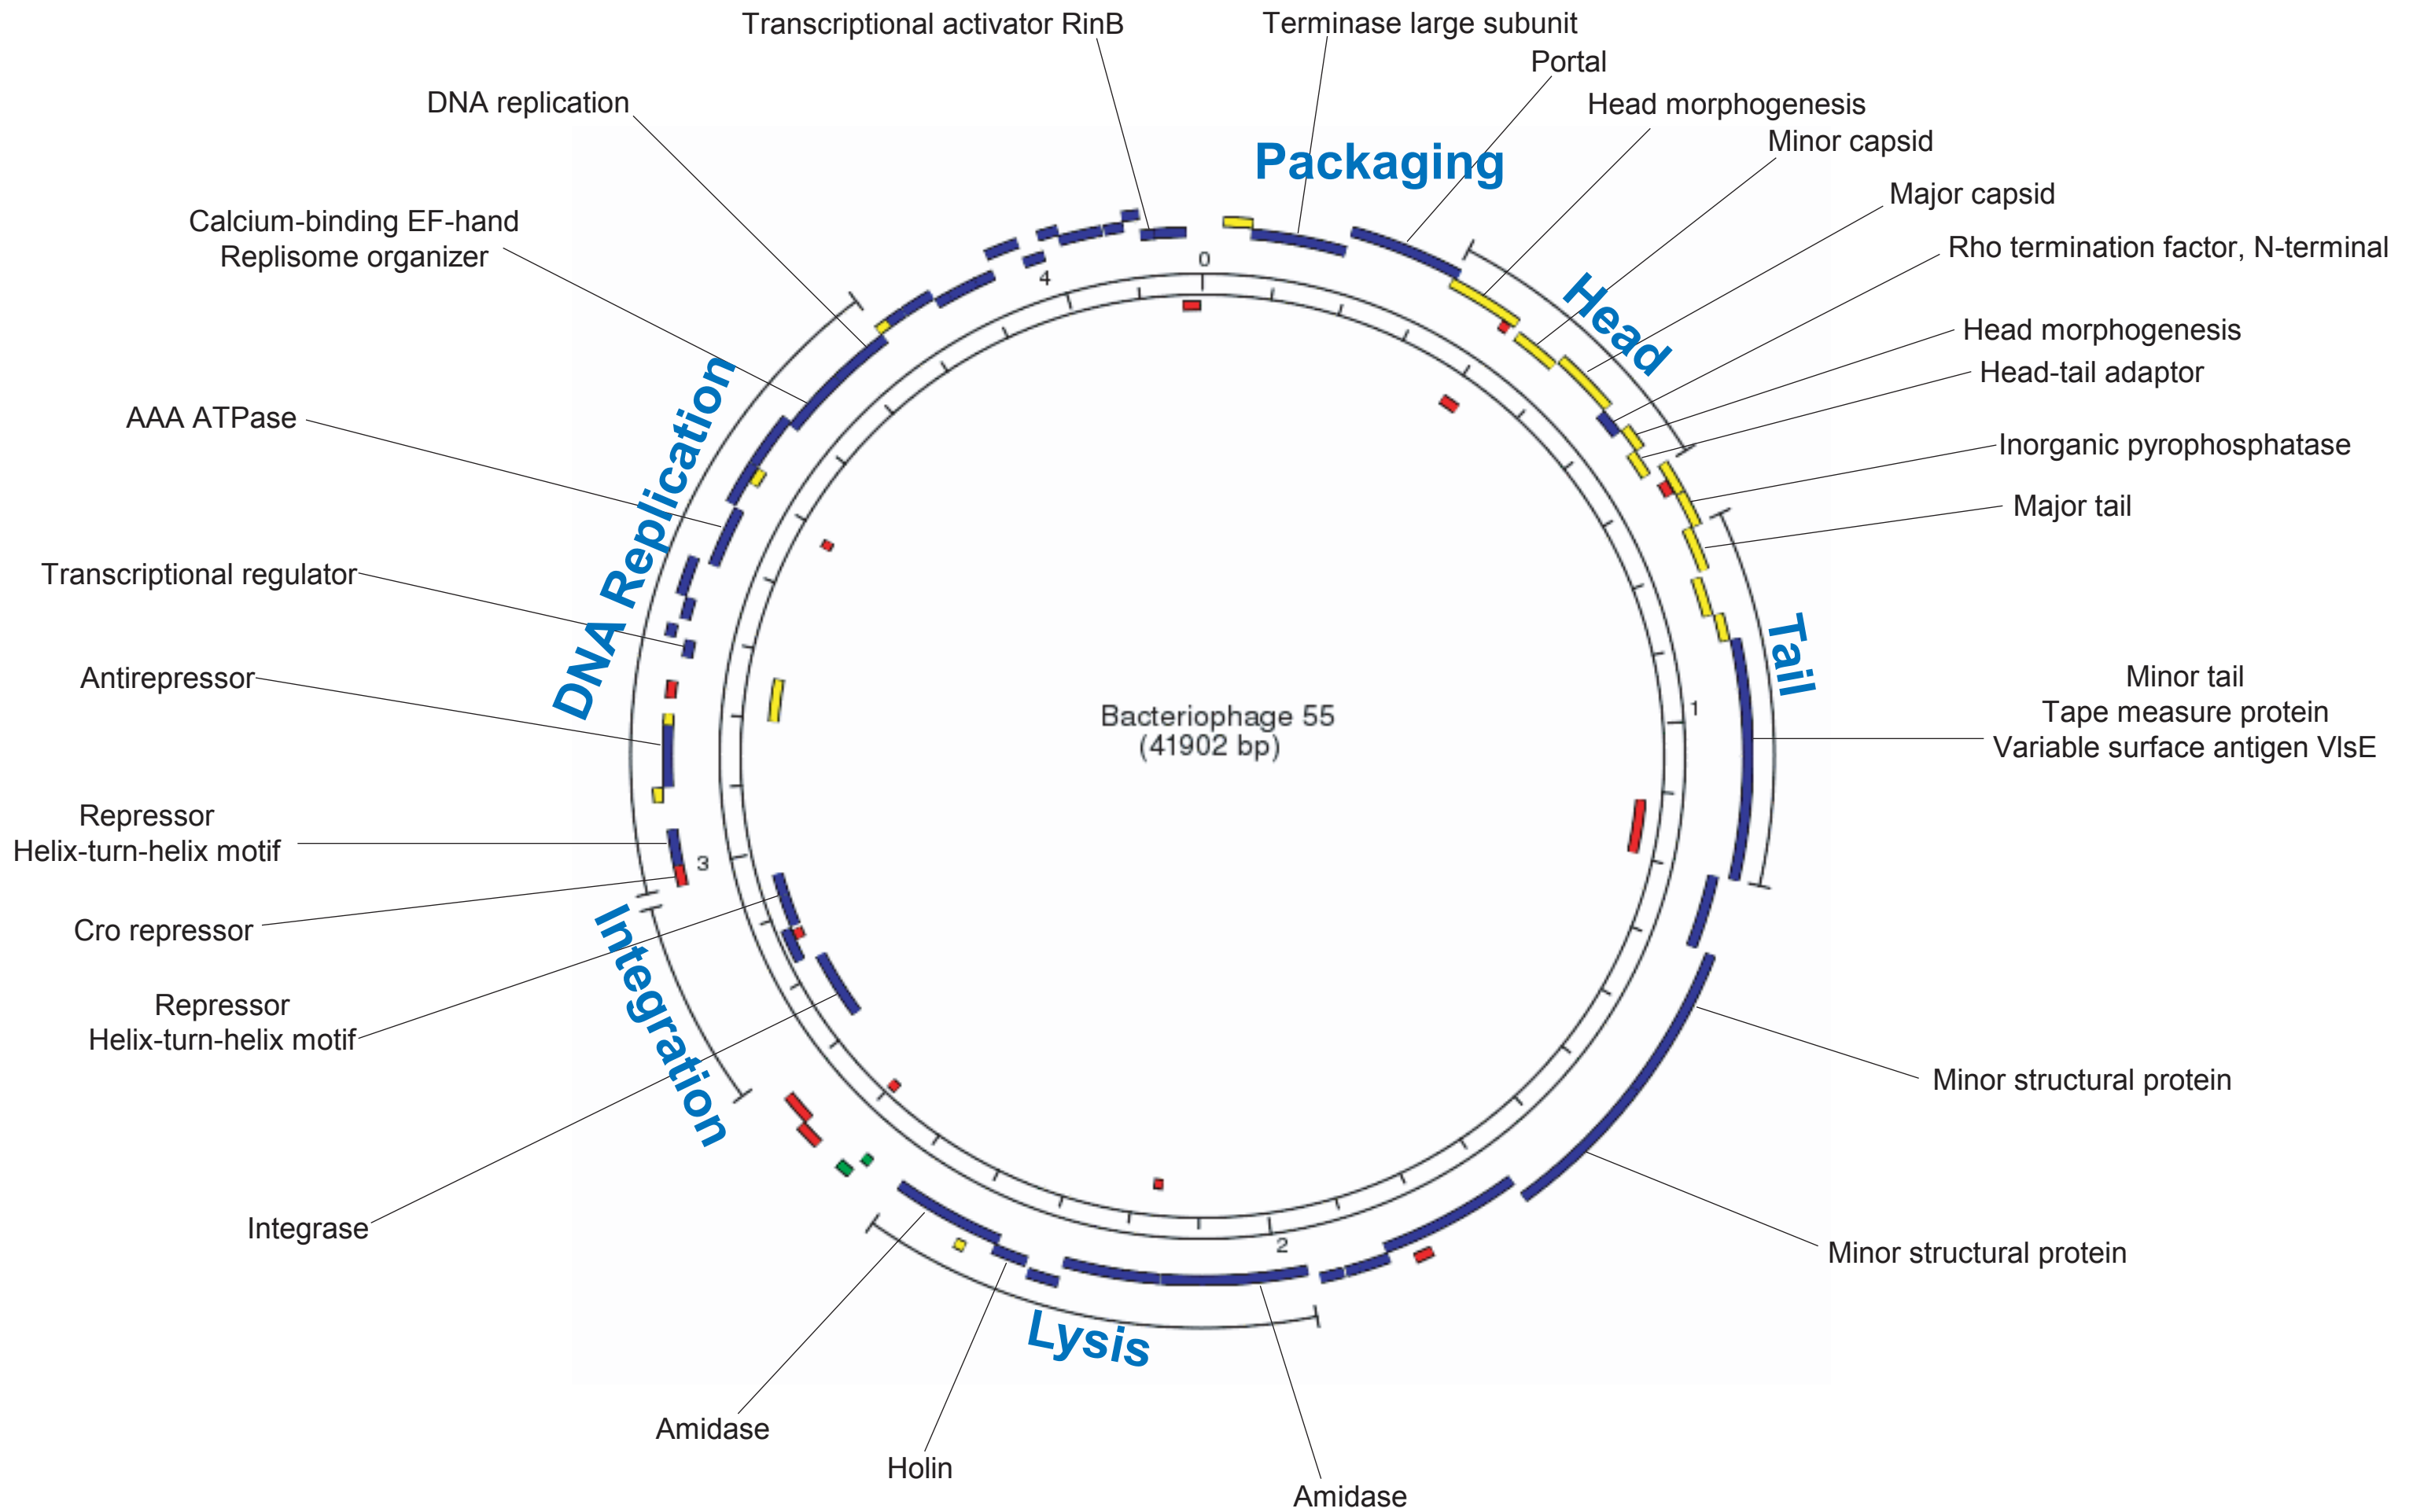

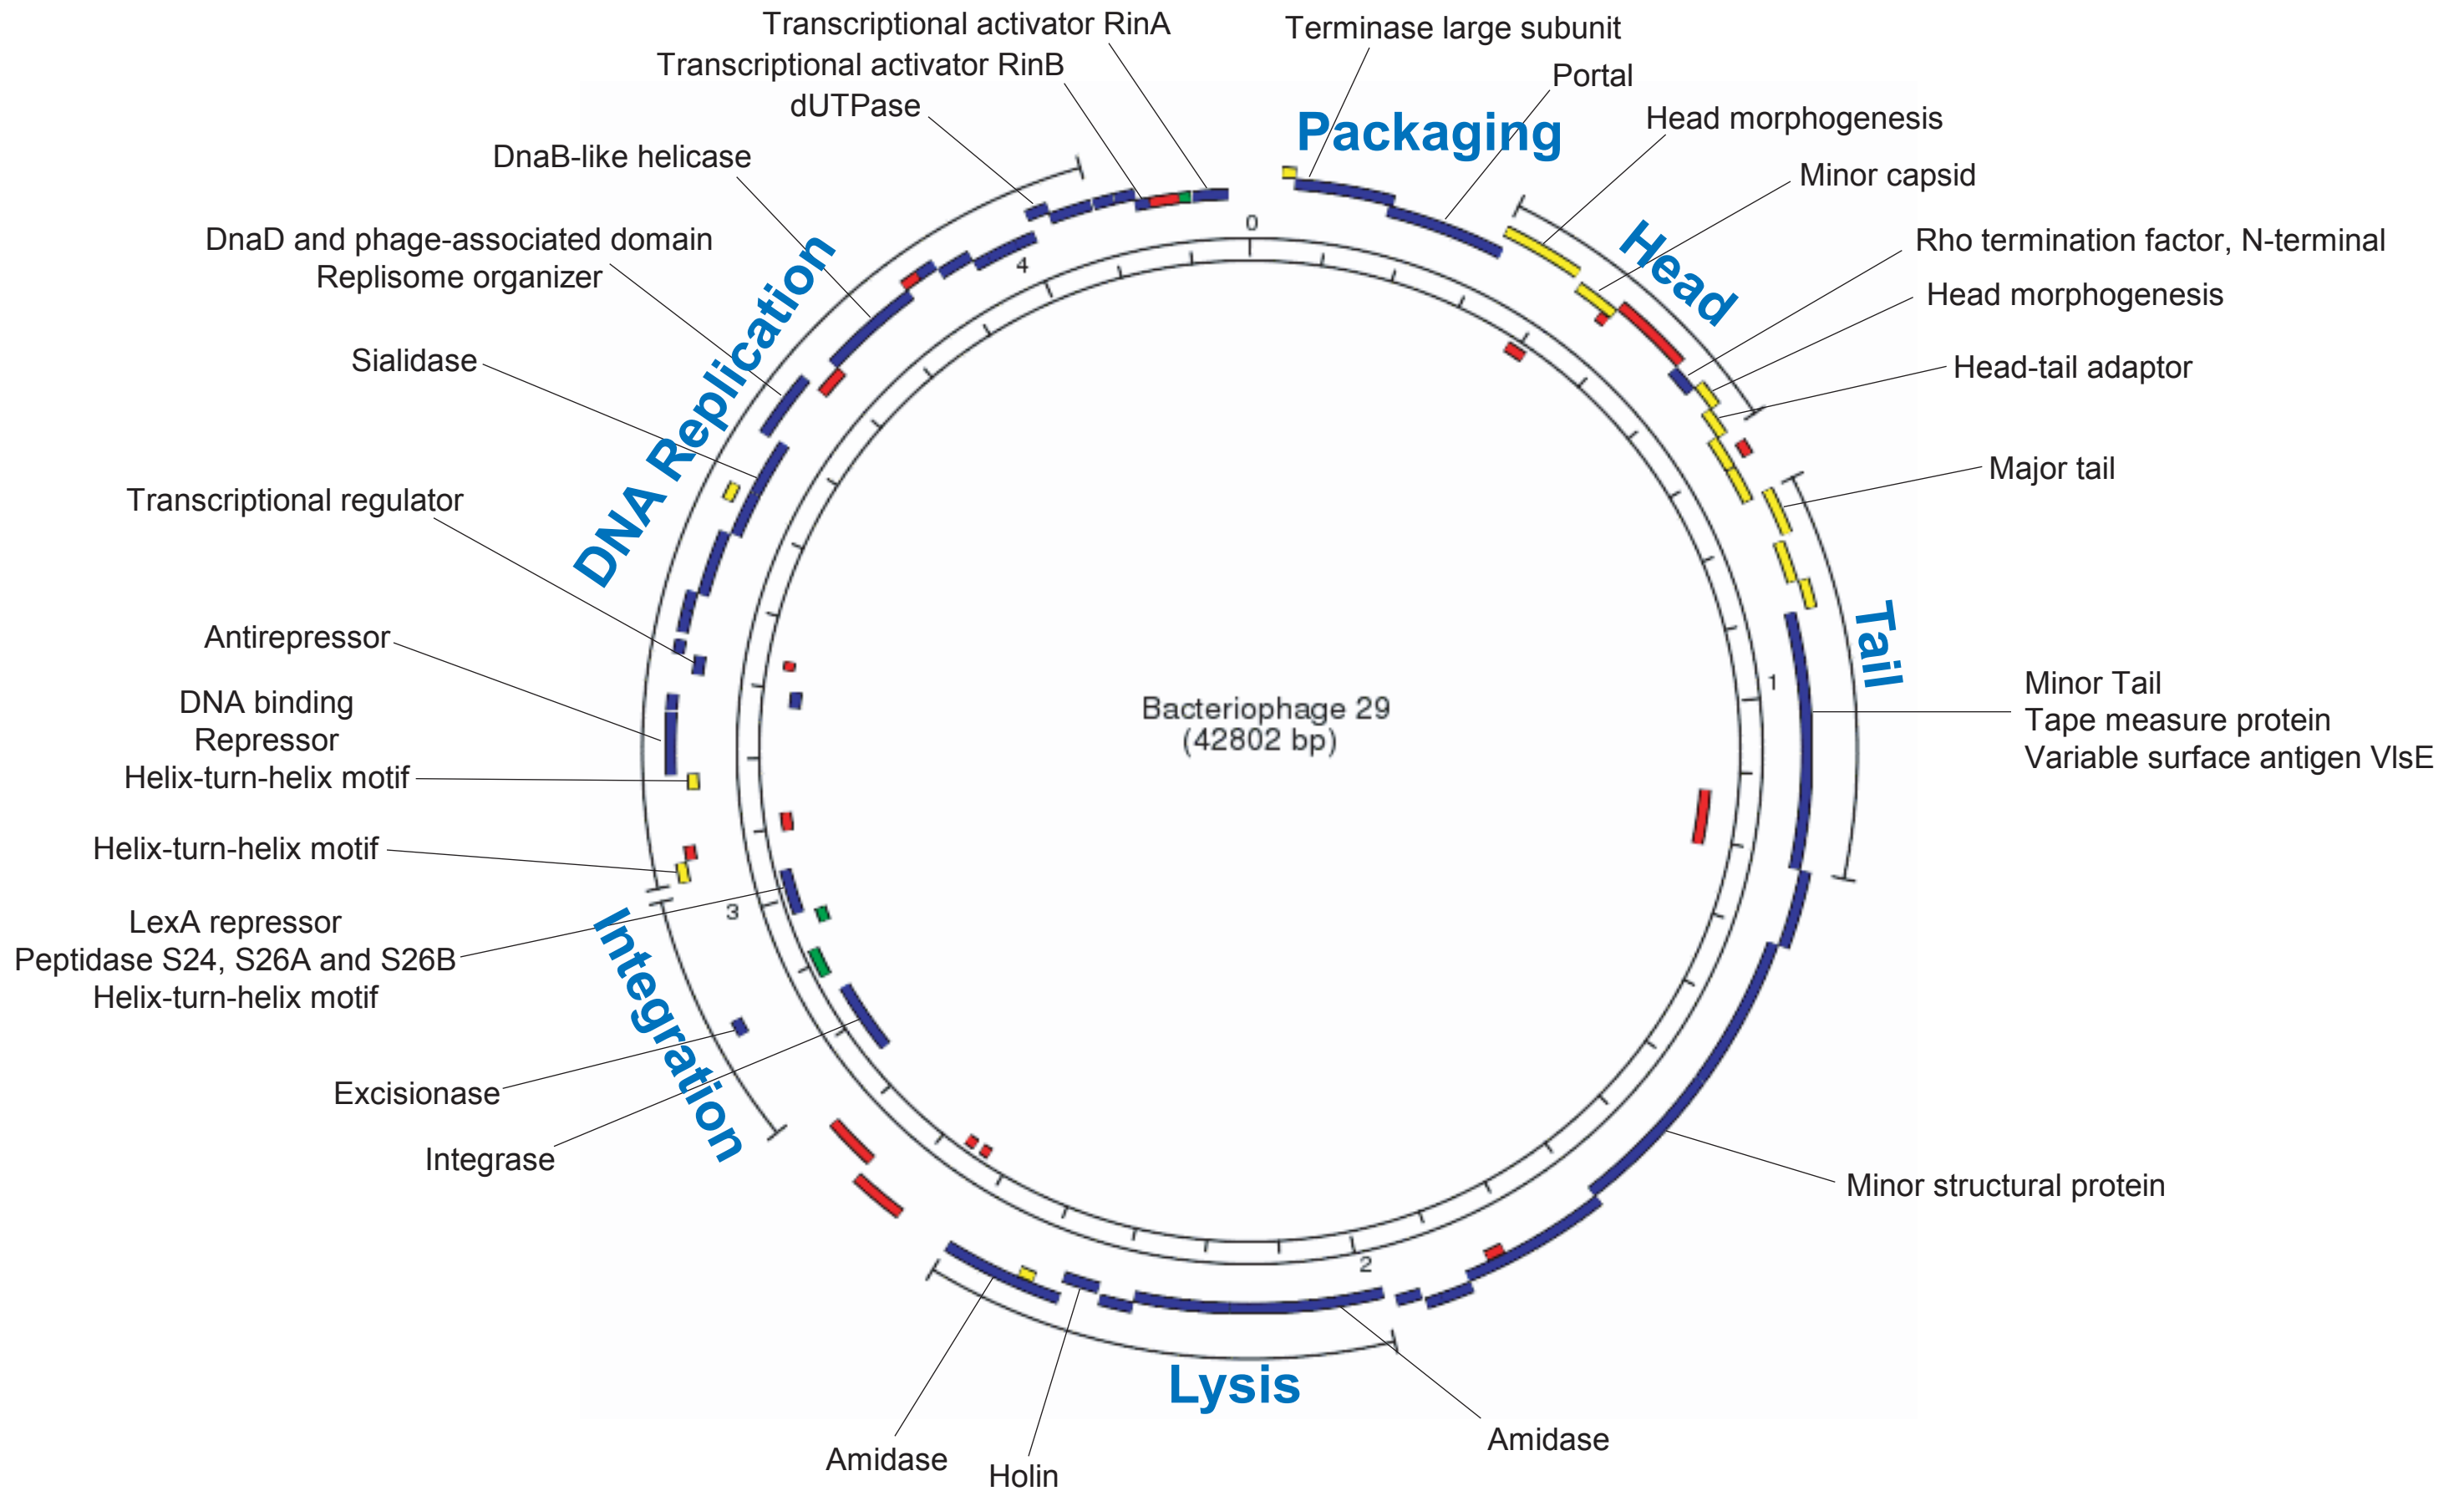

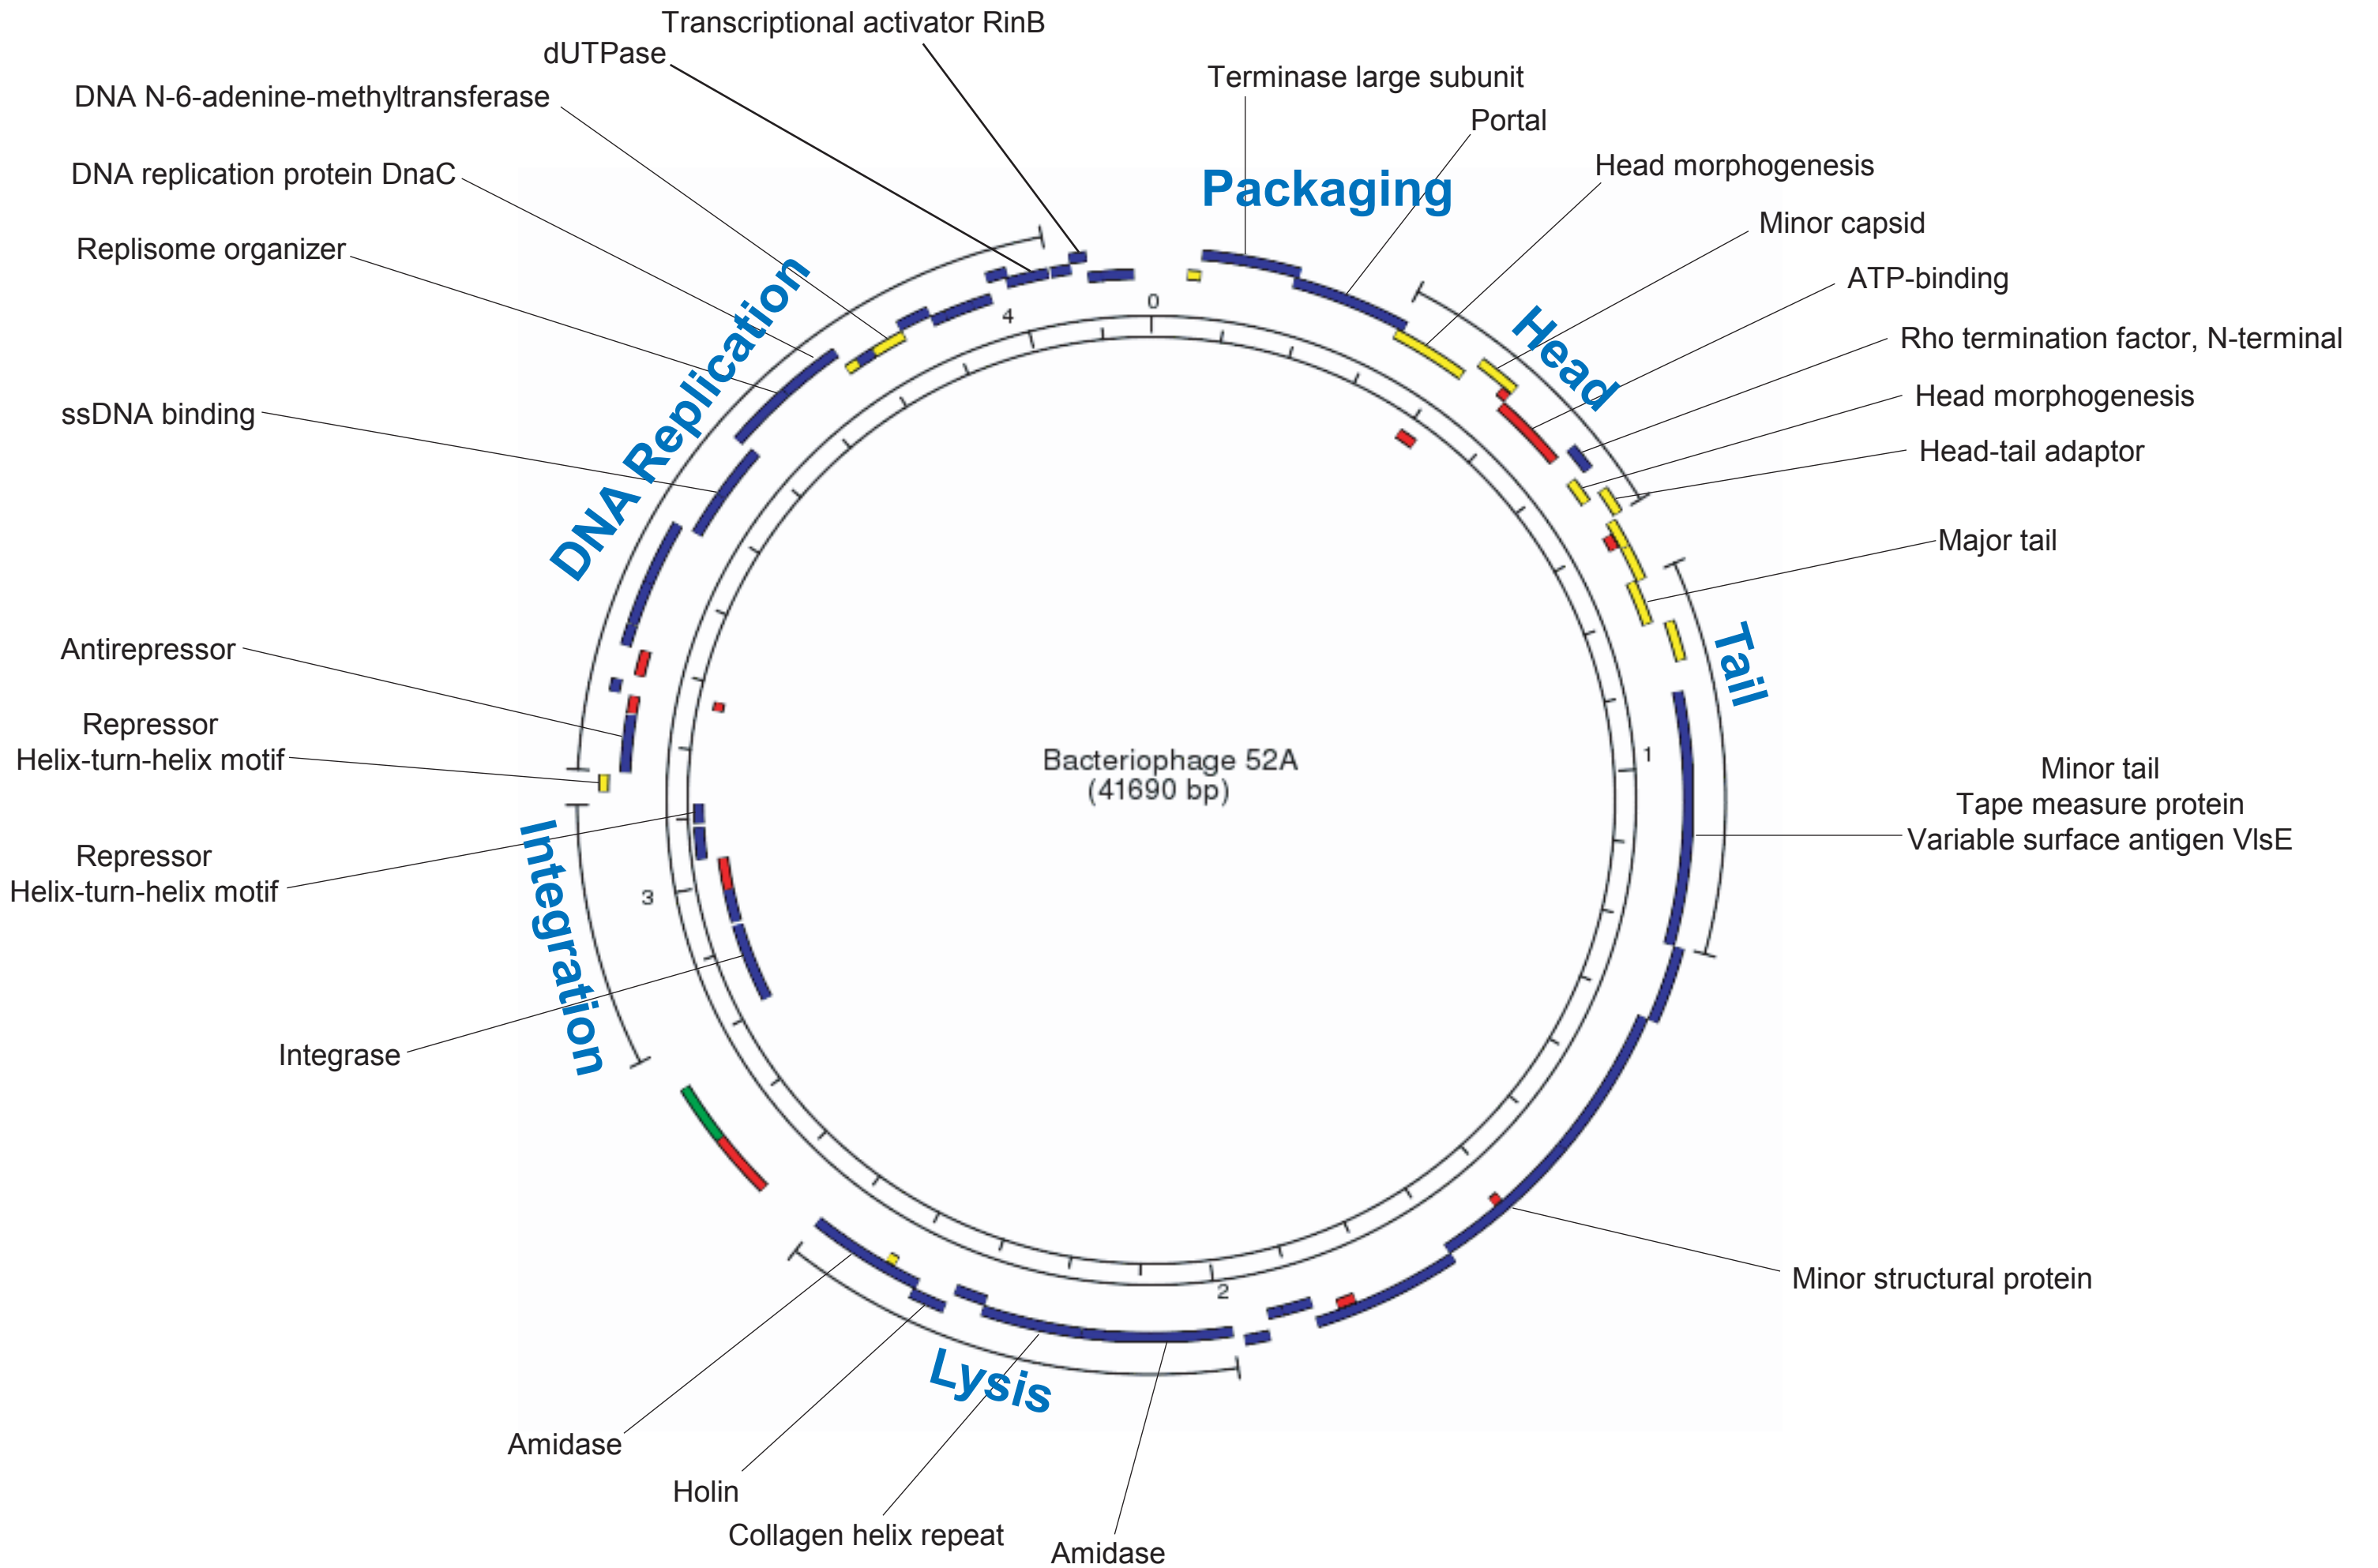

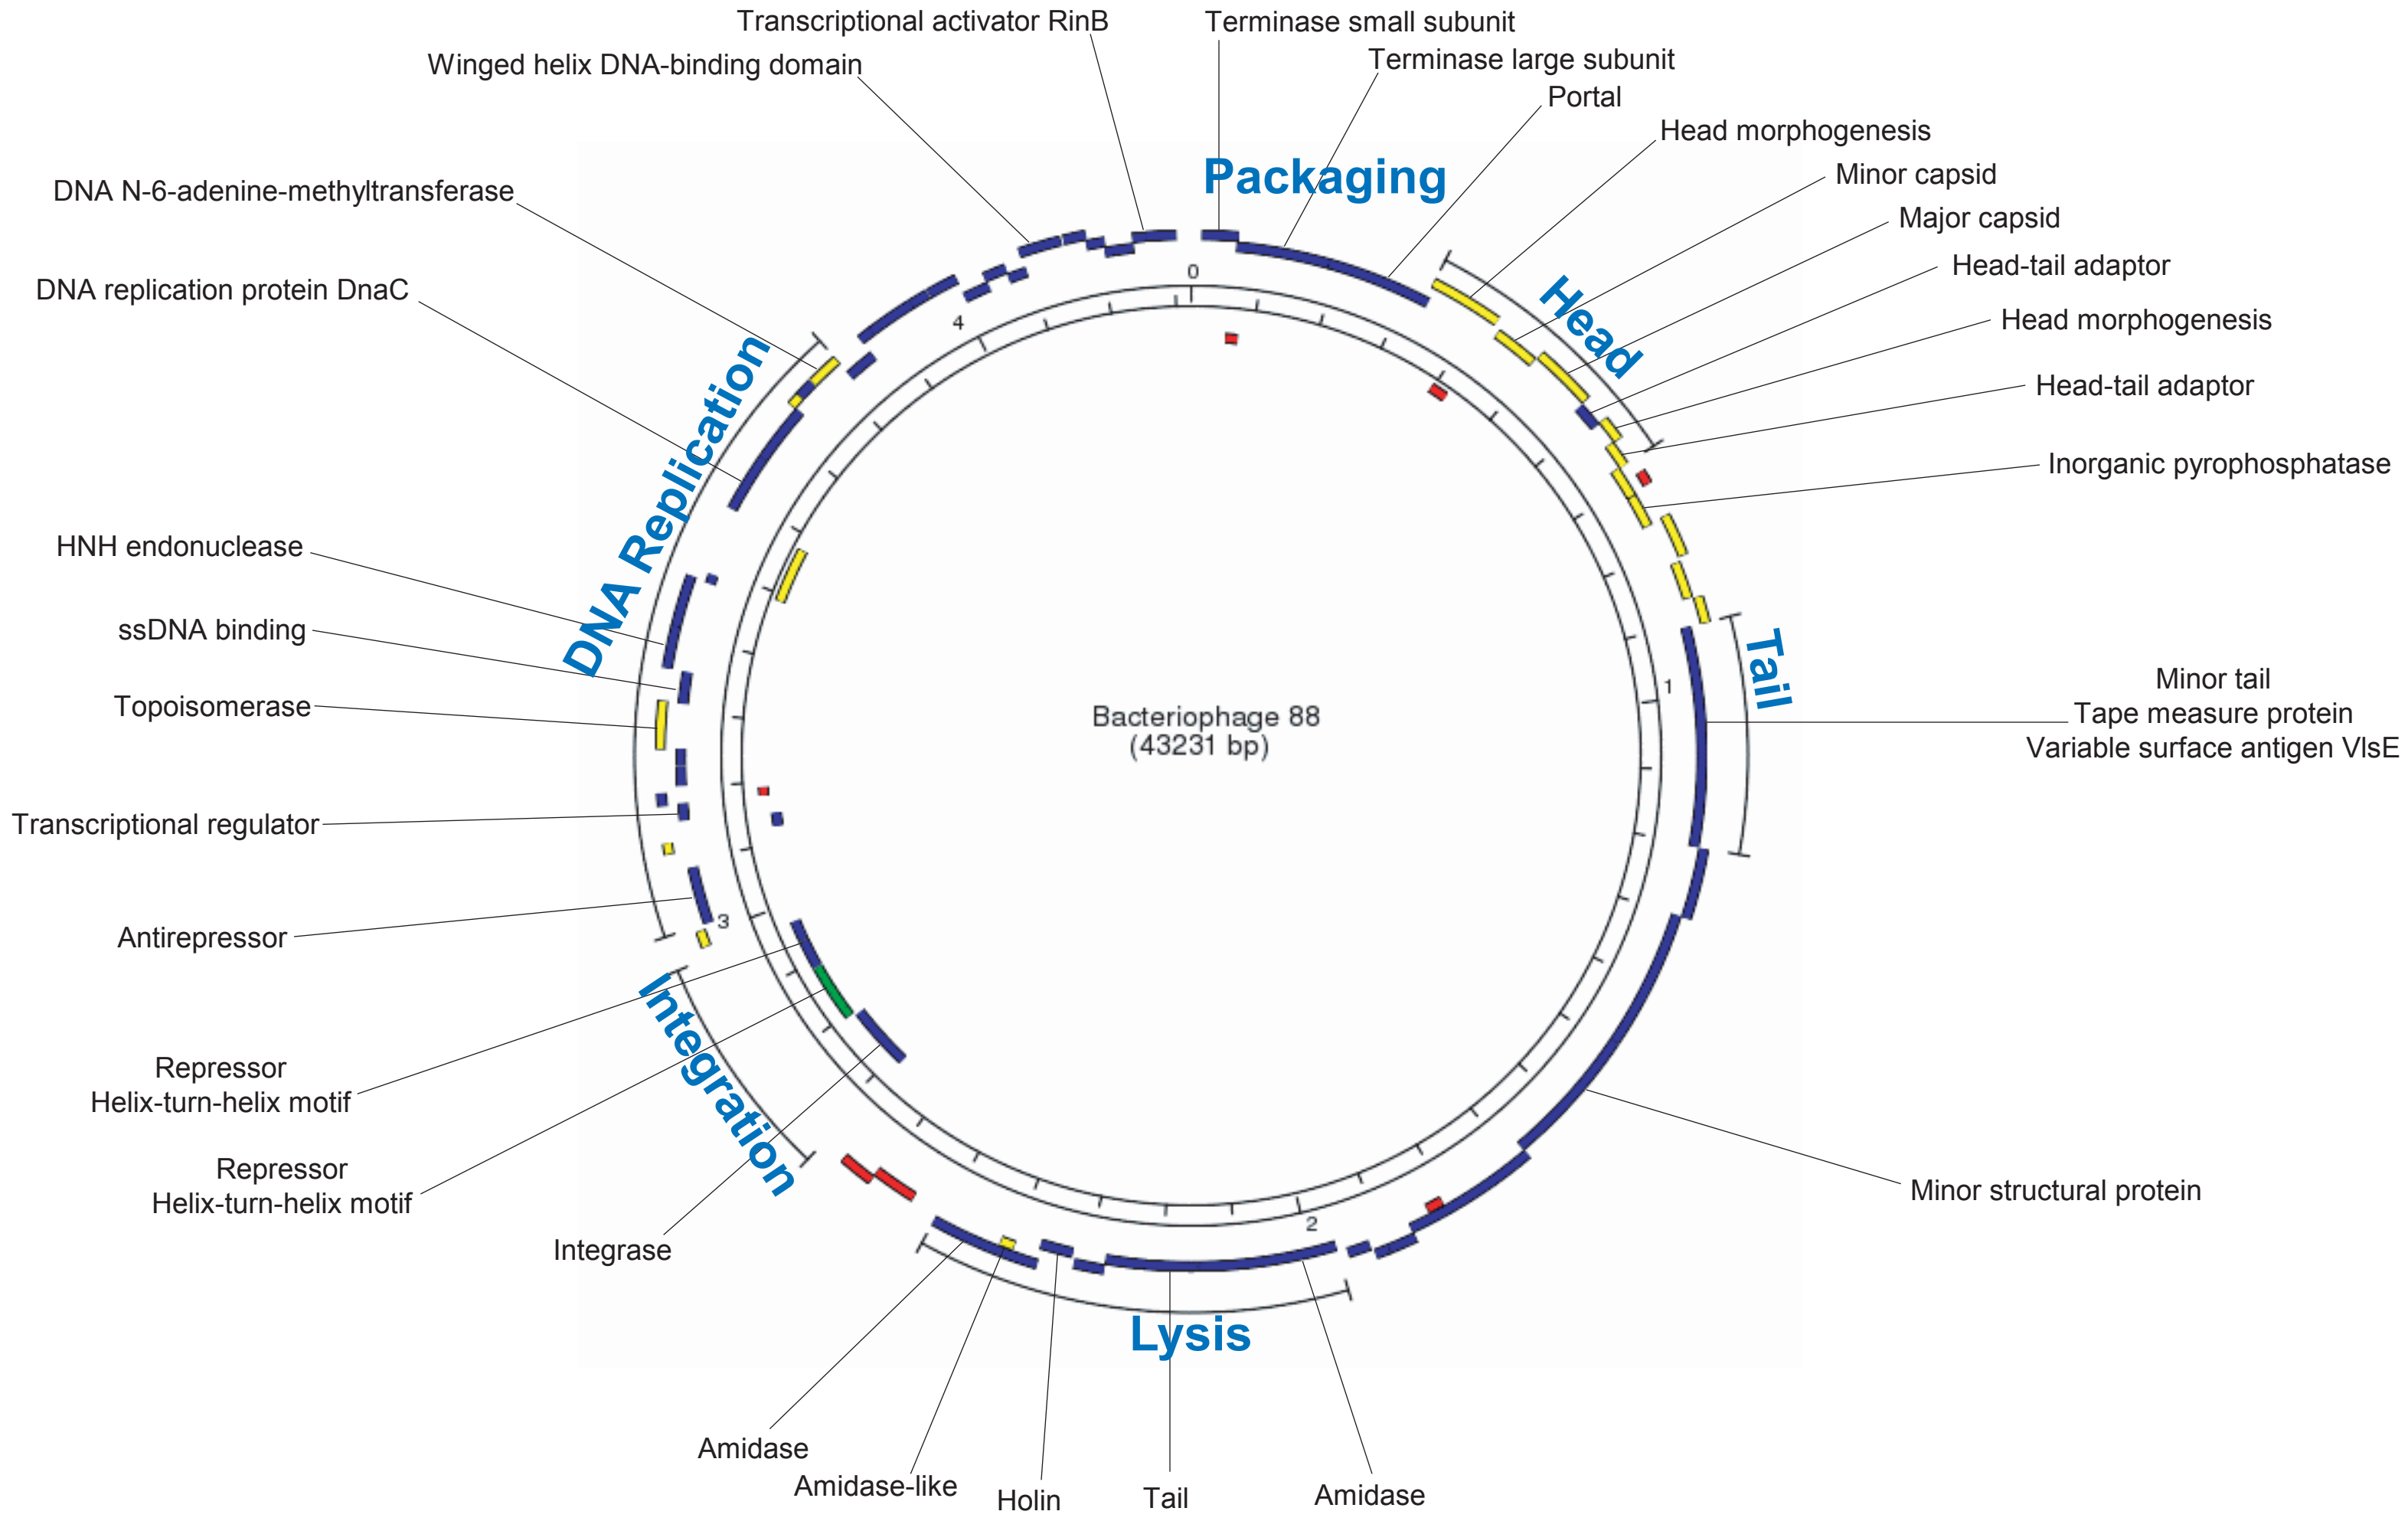

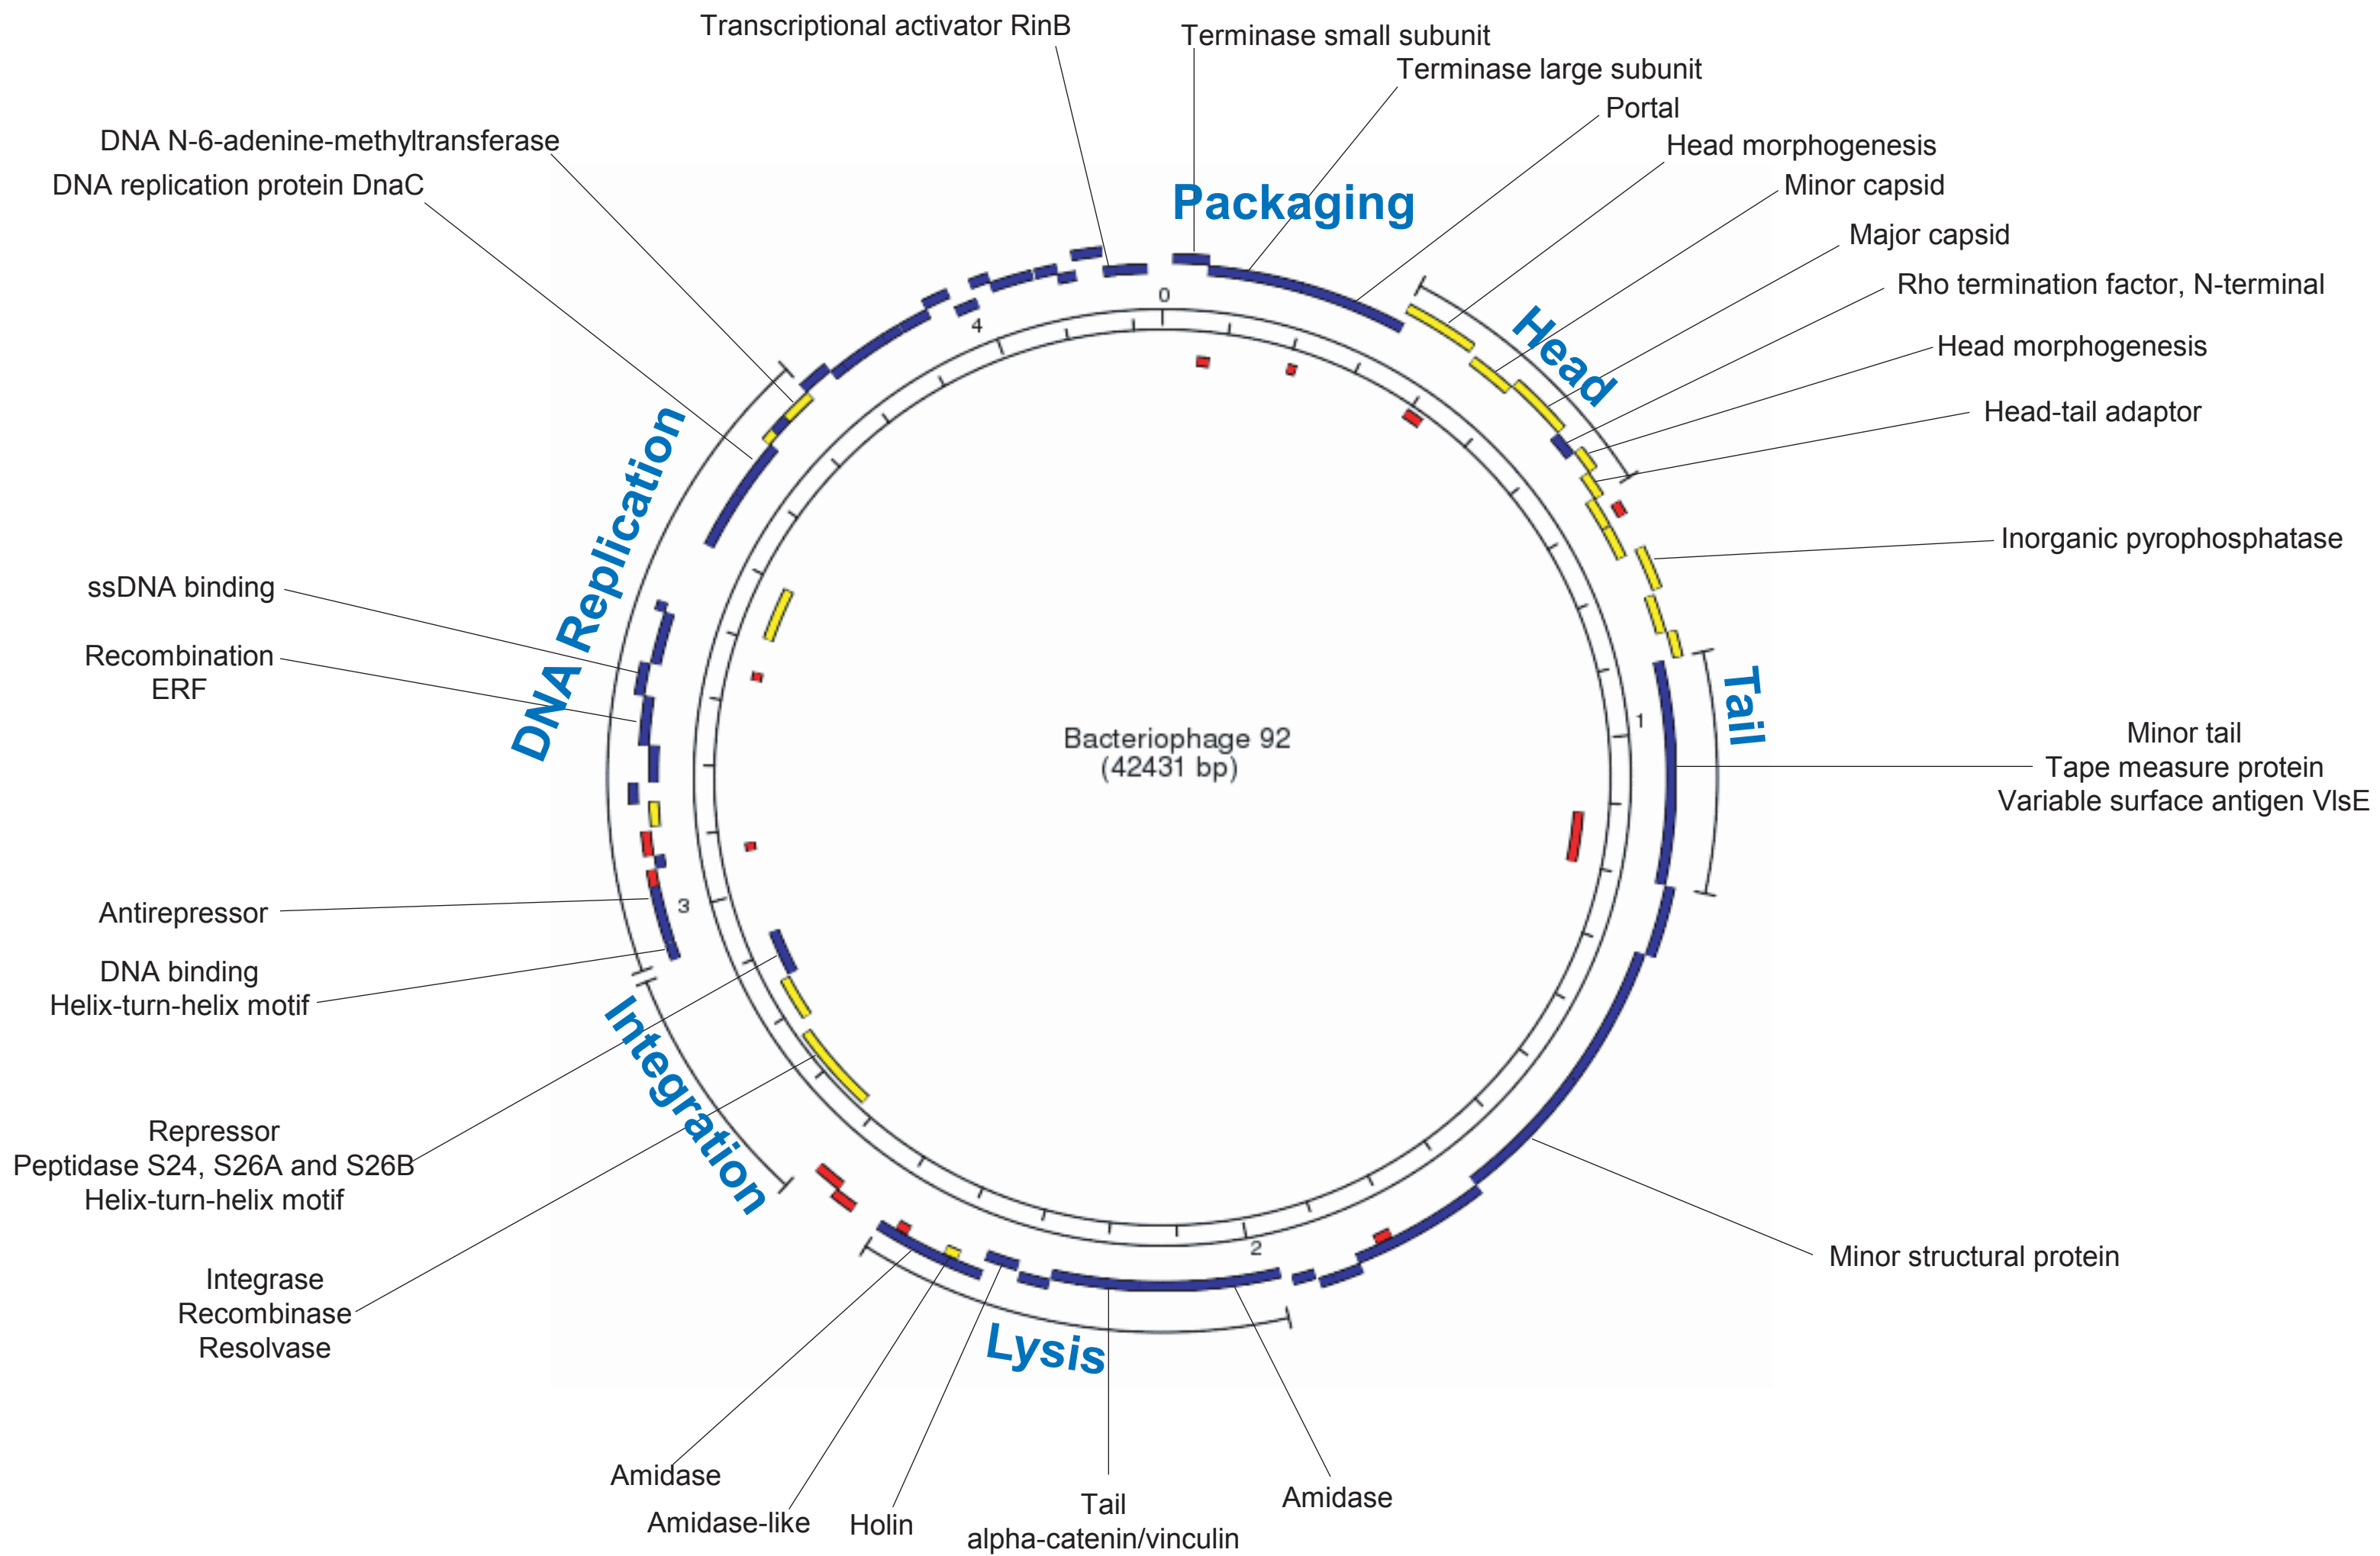

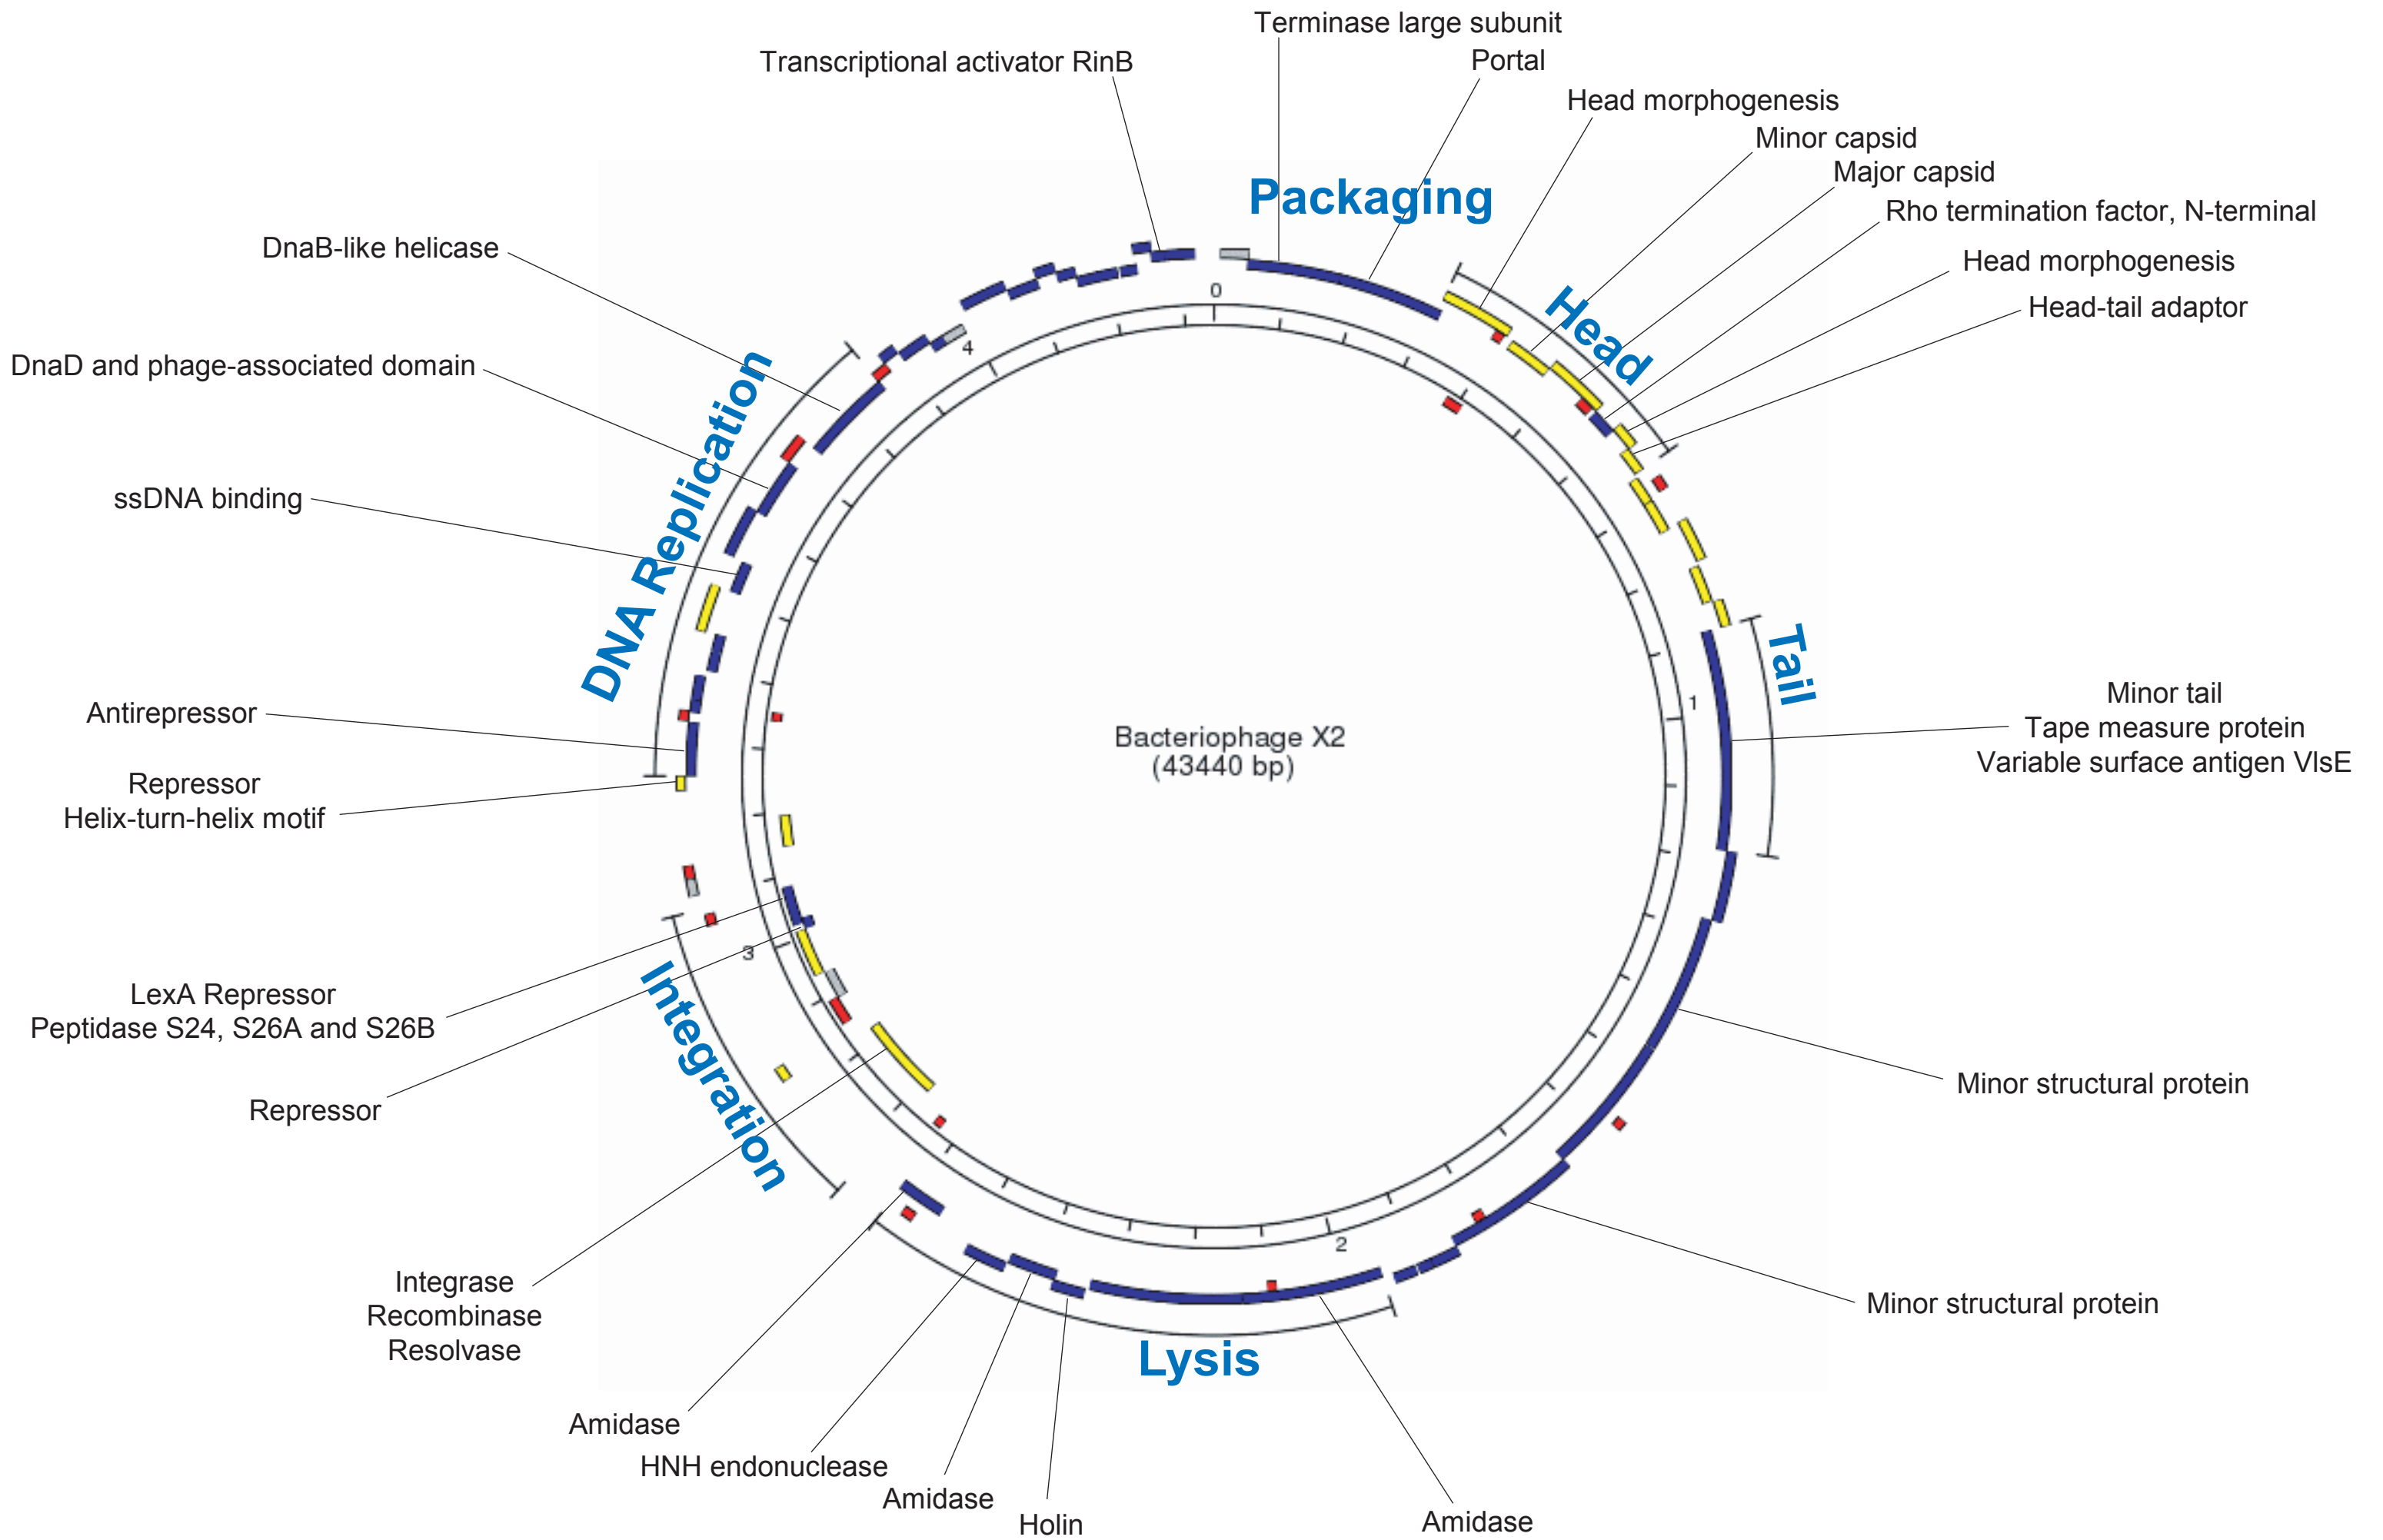



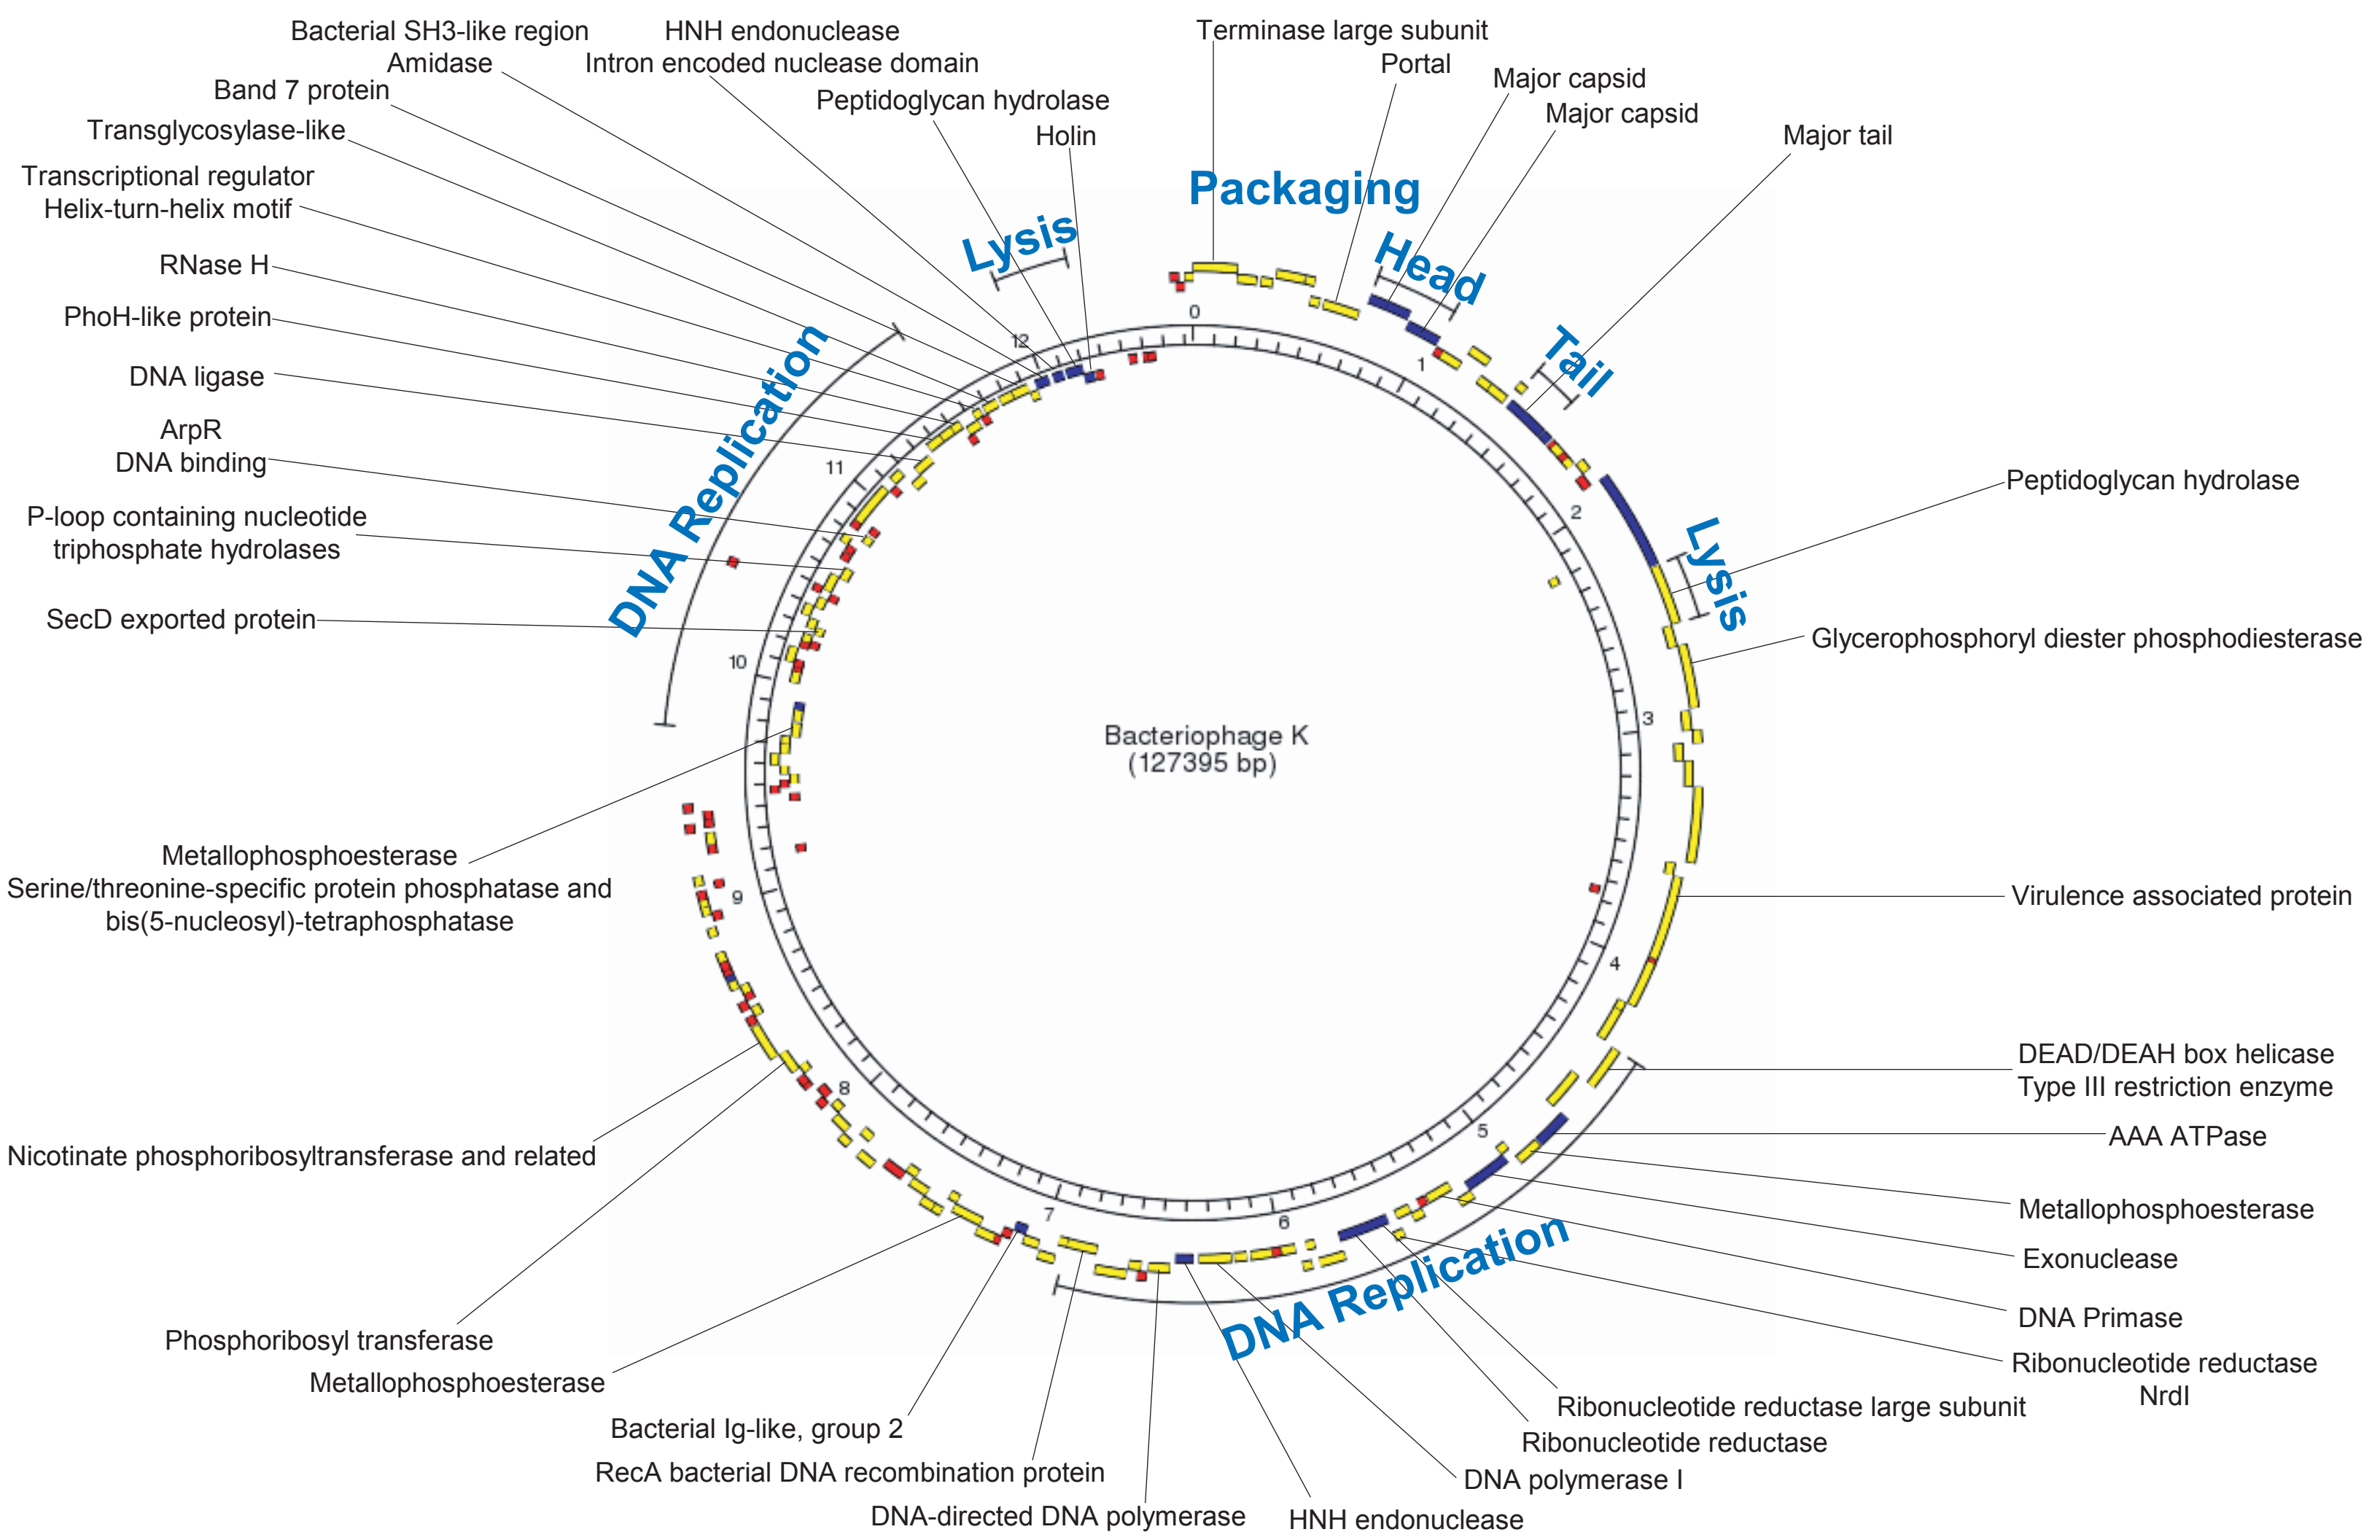

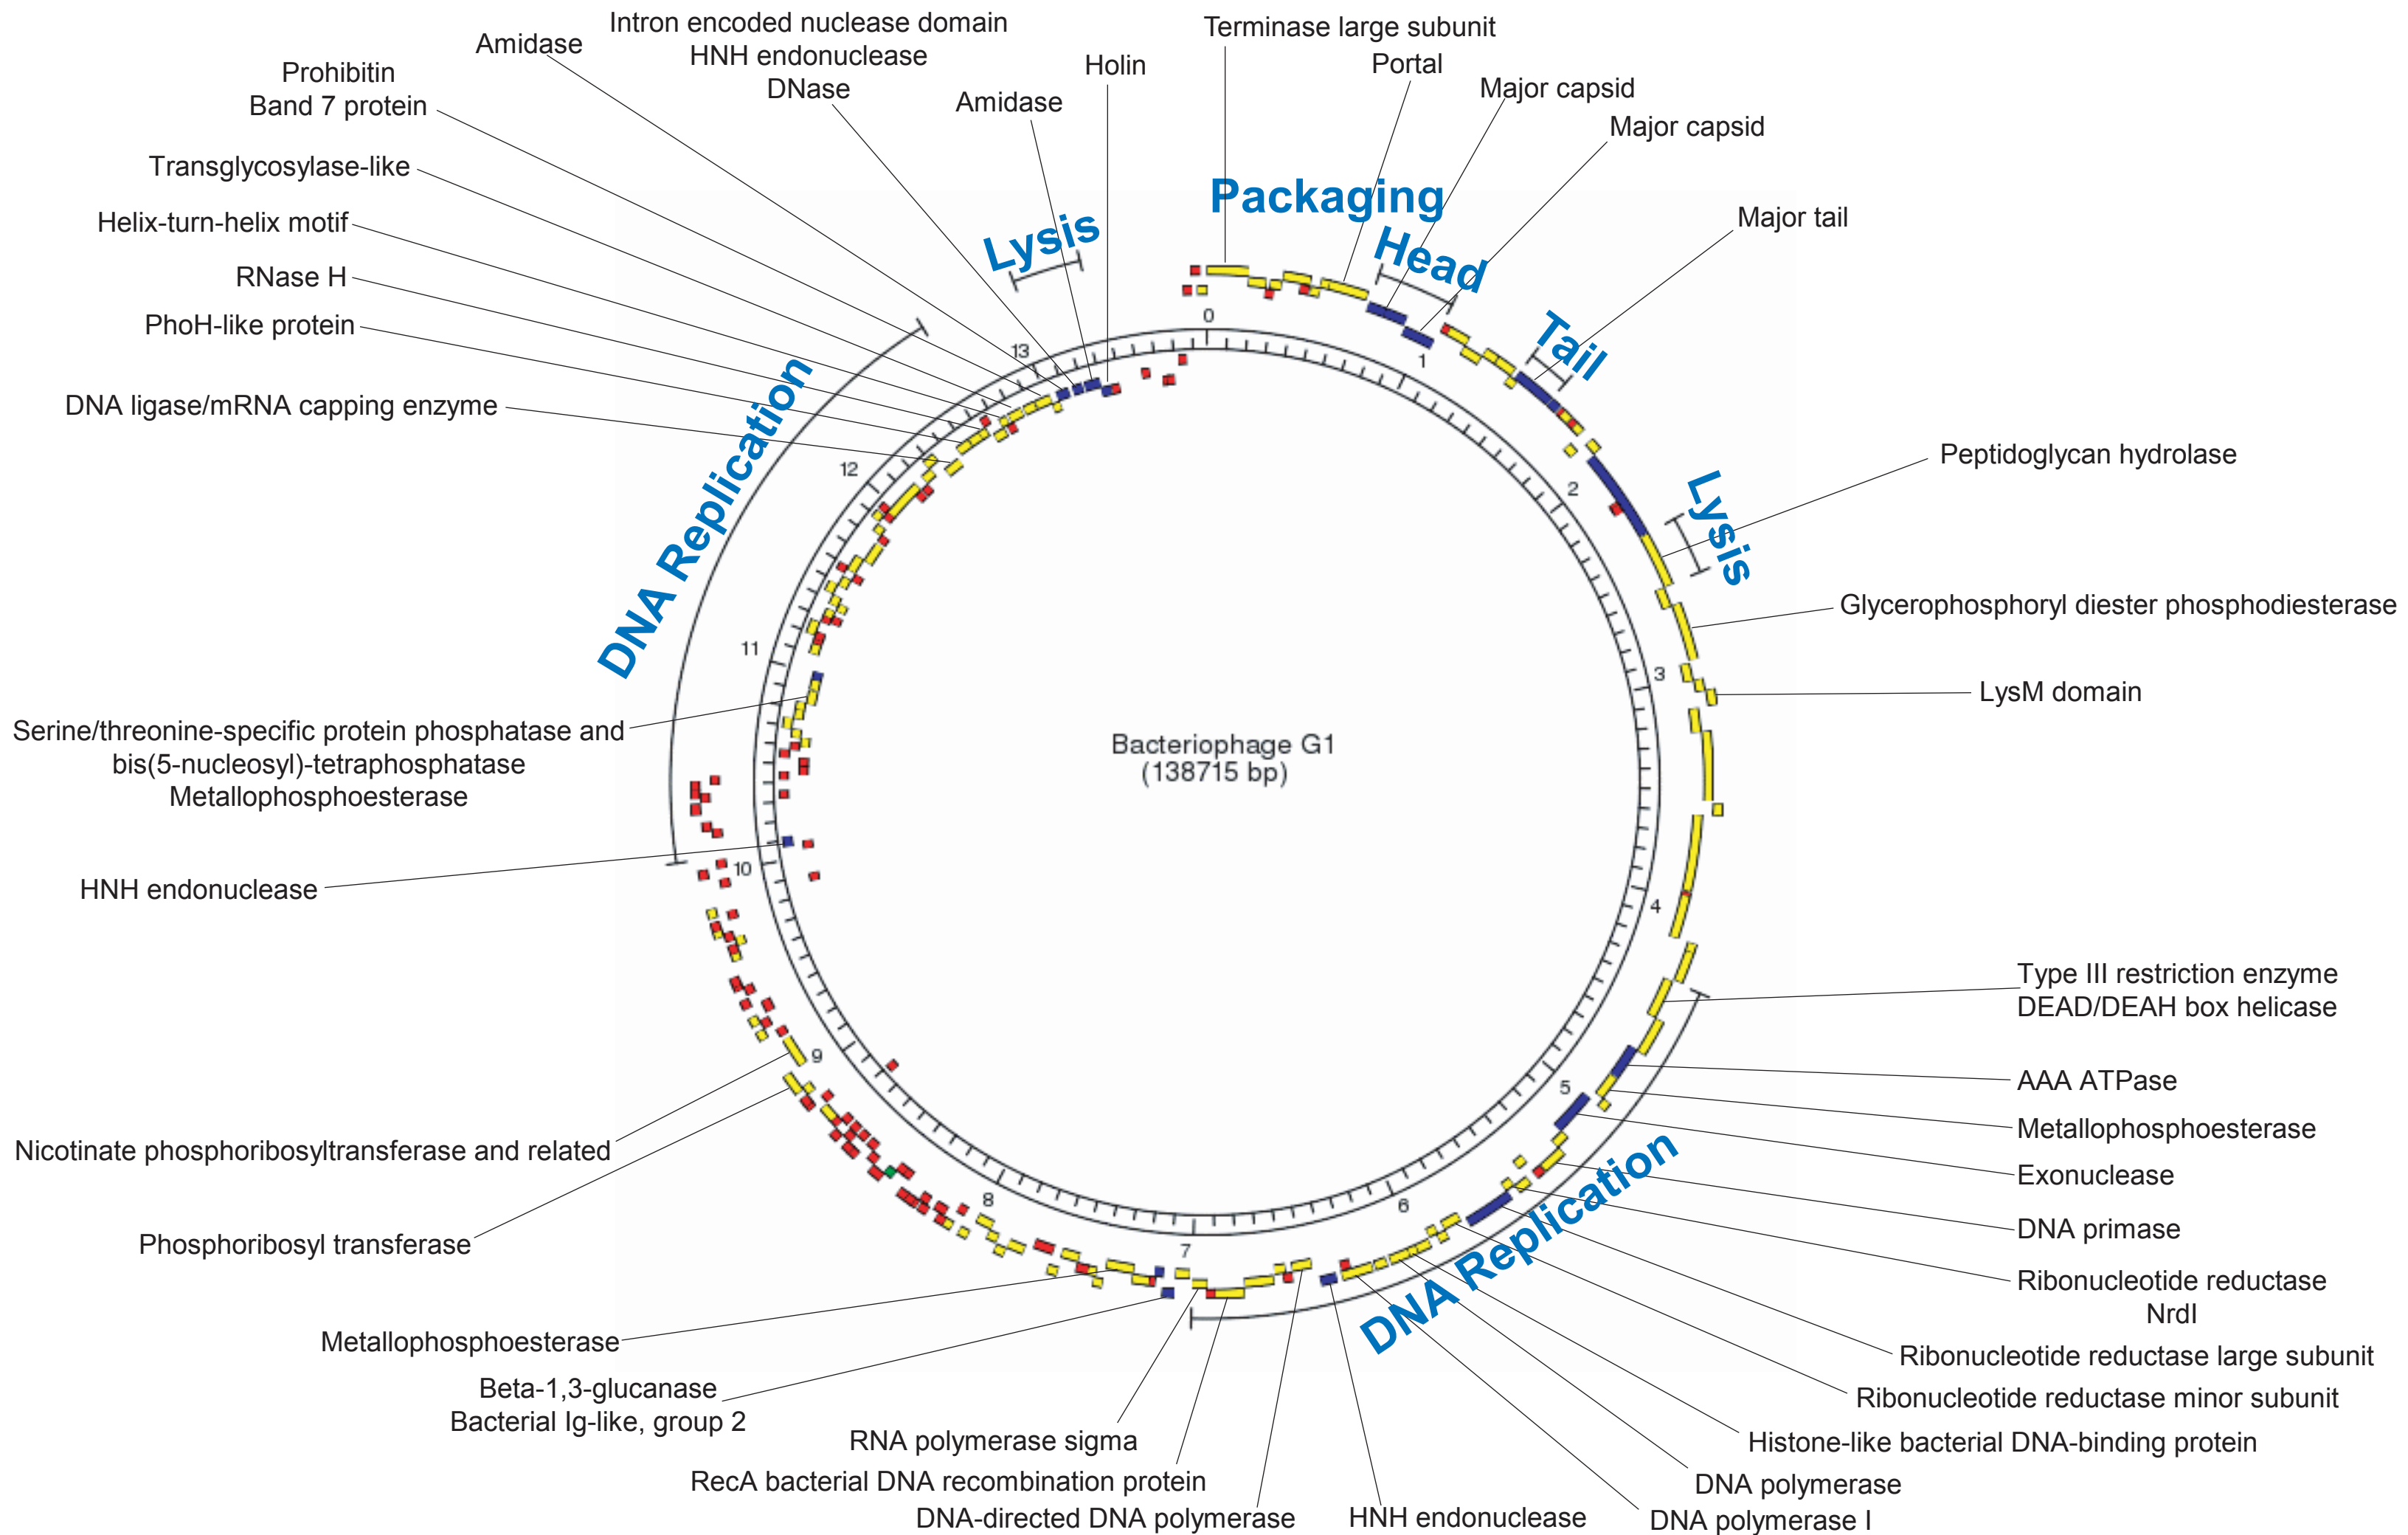

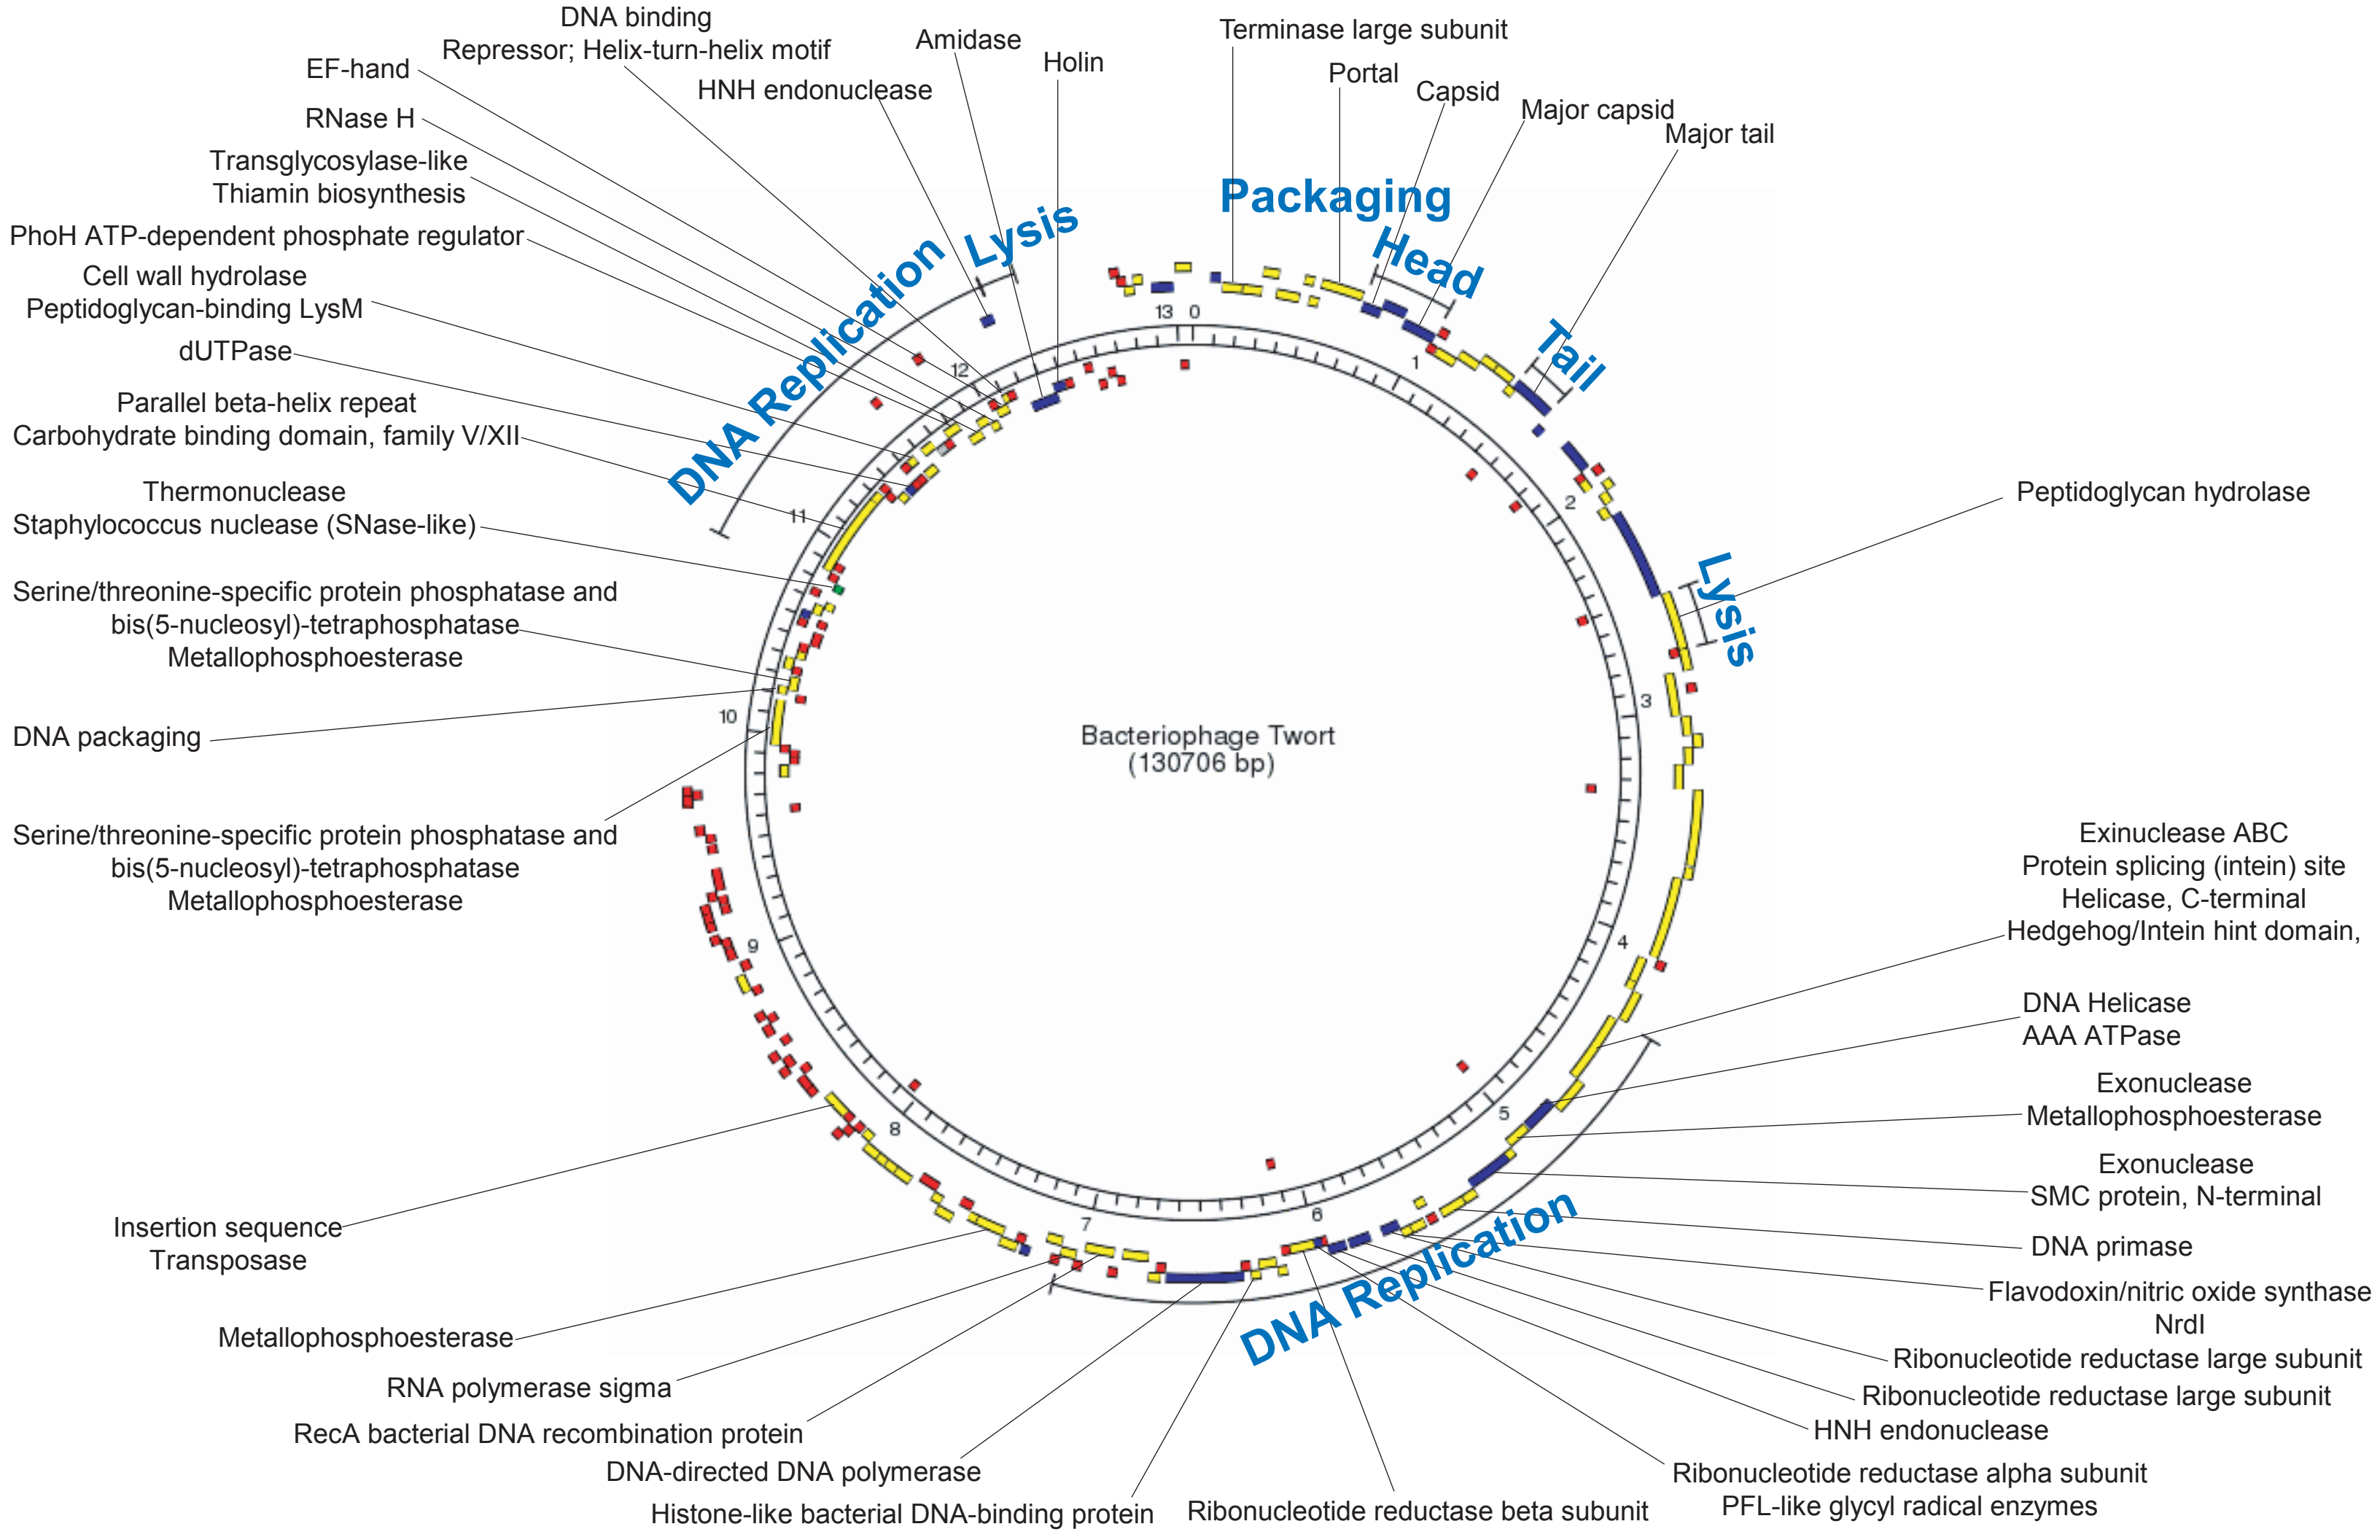

Supplement: pnas_102_14_5174__1.pdf [file pnas_102_14_5174__1.pdf]
