# Supplementary material
Source: PubMed Central journal article supplement (PMC556006)
Supplement: pnas_102_14_5174__2.pdf [file pnas_102_14_5174__2.pdf]

**Table 2. Shared *S. aureus* bacteriophage genes**

|          |           | Class I |    |        |     | Class II |    |    |    |         |    |     |    |         |    |    |    |      |    |    |    |     | Class III |    |    |     |    |       |     |
|----------|-----------|---------|----|--------|-----|----------|----|----|----|---------|----|-----|----|---------|----|----|----|------|----|----|----|-----|-----------|----|----|-----|----|-------|-----|
|          |           |         |    |        |     | Clade A  |    |    |    | Clade B |    |     |    | Clade C |    |    |    |      |    |    |    |     |           |    |    |     |    |       |     |
|          |           | PT1028  | 66 | 44AHJD | P68 | 187      | 69 | 53 | 85 | 2638A   | 77 | 42e | 3A | 47      | 37 | EW | 96 | ROSA | 71 | 55 | 29 | 52A | 88        | 92 | X2 | K   | G1 | Twort |     |
| Class I  | PT1028    |         | 0  | 0      | 0   | 4        | 2  | 1  | 2  | 2       | 3  | 3   | 2  | 3       | 3  | 1  | 1  | 2    | 1  | 1  | 1  | 1   | 2         | 2  | 0  | 1   | 1  | 0     |     |
|          | 66        | 0       |    | 25     | 27  | 2        | 4  | 3  | 4  | 1       | 1  | 4   | 4  | 4       | 3  | 3  | 3  | 3    | 3  | 4  | 4  | 4   | 4         | 4  | 4  | 3   | 3  | 2     |     |
|          | 44AHJD    | 0       | 20 |        | 28  | 2        | 4  | 3  | 4  | 1       | 1  | 2   | 2  | 2       | 3  | 3  | 3  | 3    | 3  | 4  | 4  | 4   | 4         | 4  | 4  | 3   | 3  | 2     |     |
|          | P68       | 0       | 22 | 23     |     | 2        | 4  | 4  | 5  | 1       | 1  | 4   | 4  | 4       | 3  | 3  | 3  | 3    | 3  | 4  | 4  | 4   | 4         | 4  | 4  | 4   | 4  | 4     | 3   |
| Class II | Clade A   | 187     | 0  | 1      | 1   | 1        |    | 43 | 41 | 41      | 9  | 31  | 24 | 13      | 18 | 22 | 21 | 30   | 40 | 31 | 34 | 33  | 31        | 33 | 32 | 29  | 6  | 7     | 7   |
|          |           | 69      | 0  | 3      | 3   | 3        | 33 |    | 57 | 50      | 9  | 28  | 29 | 21      | 18 | 27 | 25 | 38   | 44 | 37 | 39 | 41  | 40        | 42 | 42 | 39  | 5  | 5     | 3   |
|          |           | 53      | 0  | 1      | 1   | 1        | 33 | 48 |    | 62      | 8  | 34  | 29 | 25      | 28 | 30 | 28 | 37   | 50 | 34 | 34 | 42  | 37        | 46 | 47 | 41  | 3  | 3     | 3   |
|          |           | 85      | 2  | 3      | 3   | 3        | 30 | 39 | 51 |         | 10 | 27  | 27 | 20      | 21 | 31 | 33 | 32   | 44 | 32 | 39 | 39  | 39        | 48 | 46 | 38  | 6  | 6     | 7   |
|          | Clade B   | 2638A   | 0  | 0      | 0   | 0        | 3  | 3  | 3  | 4       |    | 25  | 19 | 23      | 23 | 12 | 11 | 10   | 10 | 9  | 11 | 10  | 11        | 9  | 9  | 8   | 2  | 2     | 4   |
|          |           | 77      | 2  | 0      | 0   | 0        | 20 | 22 | 26 | 20      | 17 |     | 30 | 30      | 33 | 18 | 18 | 27   | 37 | 28 | 28 | 27  | 25        | 32 | 31 | 24  | 1  | 1     | 4   |
|          | Clade C   | 42e     | 0  | 2      | 2   | 2        | 19 | 18 | 19 | 16      | 11 | 19  |    | 43      | 46 | 13 | 19 | 30   | 27 | 30 | 27 | 33  | 25        | 28 | 31 | 31  | 9  | 10    | 11  |
|          |           | 3A      | 0  | 1      | 1   | 1        | 8  | 11 | 16 | 12      | 14 | 18  | 37 |         | 56 | 9  | 8  | 20   | 23 | 20 | 21 | 19  | 18        | 18 | 19 | 19  | 7  | 7     | 9   |
|          |           | 47      | 1  | 1      | 1   | 1        | 9  | 9  | 15 | 11      | 15 | 20  | 35 | 49      |    | 12 | 8  | 23   | 27 | 20 | 16 | 19  | 18        | 21 | 21 | 20  | 6  | 6     | 9   |
|          |           | 37      | 0  | 2      | 2   | 2        | 8  | 13 | 14 | 15      | 4  | 7   | 6  | 3       | 3  |    | 37 | 25   | 36 | 30 | 31 | 32  | 31        | 37 | 35 | 33  | 5  | 5     | 7   |
|          | Clade C   | EW      | 0  | 2      | 2   | 2        | 8  | 11 | 11 | 19      | 4  | 7   | 7  | 3       | 2  | 25 |    | 35   | 38 | 41 | 34 | 37  | 31        | 38 | 34 | 39  | 5  | 5     | 7   |
|          |           | 96      | 0  | 1      | 1   | 1        | 20 | 29 | 29 | 26      | 2  | 19  | 21 | 10      | 12 | 14 | 23 |      | 47 | 47 | 49 | 51  | 53        | 49 | 48 | 49  | 3  | 3     | 3   |
|          |           | ROSA    | 1  | 1      | 1   | 1        | 28 | 30 | 36 | 34      | 4  | 31  | 14 | 14      | 14 | 24 | 25 | 36   |    | 56 | 50 | 53  | 48        | 53 | 51 | 44  | 3  | 3     | 6   |
|          |           | 71      | 0  | 2      | 2   | 2        | 23 | 28 | 26 | 25      | 2  | 18  | 20 | 12      | 9  | 20 | 26 | 37   | 44 |    | 56 | 52  | 47        | 52 | 46 | 51  | 3  | 3     | 4   |
|          |           | 55      | 0  | 3      | 3   | 3        | 24 | 29 | 25 | 30      | 1  | 19  | 18 | 13      | 8  | 22 | 22 | 38   | 40 | 49 |    | 54  | 53        | 53 | 53 | 48  | 4  | 4     | 3   |
|          |           | 29      | 0  | 3      | 3   | 3        | 22 | 29 | 30 | 29      | 3  | 17  | 19 | 9       | 8  | 20 | 21 | 38   | 41 | 46 | 49 |     | 53        | 49 | 47 | 52  | 7  | 6     | 5   |
|          |           | 52A     | 1  | 3      | 3   | 3        | 19 | 26 | 26 | 28      | 3  | 18  | 16 | 11      | 9  | 19 | 23 | 42   | 38 | 40 | 46 | 43  |           | 53 | 51 | 46  | 4  | 4     | 4   |
|          |           | 88      | 1  | 3      | 3   | 3        | 21 | 31 | 34 | 37      | 3  | 22  | 17 | 10      | 10 | 25 | 24 | 37   | 42 | 45 | 45 | 41  | 42        |    | 63 | 55  | 7  | 8     | 6   |
|          | X2        | 0       | 3  | 3      | 3   | 20       | 31 | 36 | 37 | 3       | 22 | 22  | 11 | 10      | 24 | 23 | 38 | 40   | 39 | 46 | 39 | 42  | #         |    | 55 | 5   | 5  | 4     |     |
|          | Class III | K       | 0  | 2      | 2   | 2        | 2  | 1  | 0  | 1       | 1  | 0   | 2  | 1       | 1  | 2  | 2  | 0    | 1  | 0  | 1  | 1   | 1         | 1  | 1  | 1   |    | 192   | 130 |
| G1       |           | 0       | 2  | 2      | 2   | 2        | 1  | 0  | 1  | 1       | 0  | 2   | 1  | 1       | 2  | 2  | 0  | 1    | 0  | 1  | 1  | 1   | 1         | 1  | 1  | 163 |    | 134   |     |
| Twort    |           | 0       | 1  | 1      | 1   | 1        | 2  | 1  | 2  | 1       | 0  | 2   | 0  | 0       | 4  | 4  | 0  | 1    | 1  | 2  | 2  | 2   | 2         | 2  | 2  | 91  | 92 |       |     |

The values represent the number of shared genes from the different pairs of *S. aureus* bacteriophages. The numbers in the top part (Roman) and bottom part (italics) are derived from BLAST cutoff *E* values of  $10^{-4}$  and  $10^{-20}$ , respectively. The phages are grouped according to size class: I (< 20 kbp), II ( $\approx$ 40 kbp), and III (> 125 kbp).
