# Supplementary material
Source: PubMed Central journal article supplement (PMC556006)
Supplement: pnas_102_14_5174__3.pdf [file pnas_102_14_5174__3.pdf]

**Table 3. Shared *S. aureus* ORFs among non-database matches**

|           |        | Class I |    |        |     | Class II |    |    |    |       |    |     |    |    |    |    |    |      |    |    |    |     | Class III |    |    |    |    |       |   |   |
|-----------|--------|---------|----|--------|-----|----------|----|----|----|-------|----|-----|----|----|----|----|----|------|----|----|----|-----|-----------|----|----|----|----|-------|---|---|
|           |        | PT1028  | 66 | 44AHJD | P68 | 187      | 69 | 53 | 85 | 2638A | 77 | 42e | 3A | 47 | 37 | EW | 96 | ROSA | 71 | 55 | 29 | 52A | 88        | 92 | X2 | K  | G1 | Twort |   |   |
| Phage     | ORFs   |         |    |        |     |          |    |    |    |       |    |     |    |    |    |    |    |      |    |    |    |     |           |    |    |    |    |       |   |   |
| Class I   | PT1028 | 2       | -  | -      | -   | -        | -  | -  | -  | -     | -  | -   | -  | -  | -  | -  | -  | -    | -  | -  | -  | -   | -         | -  | -  | -  | -  | -     | - |   |
|           | 66     | 6       | -  | 6      | 6   | -        | -  | -  | -  | -     | -  | -   | -  | -  | -  | -  | -  | -    | -  | -  | -  | -   | -         | -  | -  | -  | -  | -     | - |   |
|           | 44AHJD | 13      | -  | 1      | 9   | -        | -  | -  | -  | -     | -  | -   | -  | -  | -  | -  | -  | -    | -  | -  | -  | -   | -         | -  | -  | -  | -  | -     | - |   |
|           | P68    | 9       | -  | 1      | 5   | -        | -  | -  | -  | -     | -  | -   | -  | -  | -  | -  | -  | -    | -  | -  | -  | -   | -         | -  | -  | -  | -  | -     | - |   |
| Class II  | 187    | 14      | -  | -      | -   | -        | -  | 1  | 4  | -     | -  | 1   | -  | 1  | -  | 1  | -  | 2    | 1  | -  | 2  | 1   | 1         | 1  | 2  | -  | -  | -     | - |   |
|           | 69     | 9       | -  | -      | -   | -        | -  | 4  | 3  | -     | -  | -   | -  | 1  | 1  | -  | 2  | 2    | 1  | -  | 1  | -   | -         | 1  | -  | -  | -  | -     | - |   |
|           | 53     | 14      | -  | -      | -   | -        | -  | 2  | 7  | -     | -  | 1   | -  | 3  | -  | 1  | 1  | 2    | 1  | 2  | 2  | 3   | 2         | 2  | 4  | -  | -  | -     | - |   |
|           | 85     | 15      | -  | -      | -   | -        | 2  | 1  | 3  | -     | -  | 3   | -  | 1  | -  | 2  | 1  | 1    | 1  | 5  | 3  | 2   | 2         | 4  | 3  | -  | -  | -     | - |   |
|           | 2638A  | 17      | -  | -      | -   | -        | -  | -  | -  | -     | -  | -   | -  | 1  | 2  | -  | -  | -    | -  | -  | -  | -   | -         | -  | -  | -  | -  | -     | - |   |
|           | 77     | 0       | -  | -      | -   | -        | -  | -  | -  | -     | -  | -   | -  | -  | -  | -  | -  | -    | -  | -  | -  | -   | -         | -  | -  | -  | -  | -     | - |   |
|           | 42e    | 14      | -  | -      | -   | -        | -  | -  | 2  | -     | -  | 3   | 6  | -  | 2  | 3  | 1  | 3    | 2  | 4  | 1  | 1   | 3         | 4  | -  | -  | -  | -     | - |   |
|           | 3A     | 7       | -  | -      | -   | -        | -  | -  | -  | -     | -  | 1   | 2  | -  | -  | -  | -  | -    | 1  | -  | -  | -   | -         | -  | -  | -  | -  | -     | - |   |
|           | 47     | 11      | -  | -      | -   | -        | -  | -  | 1  | -     | -  | 2   | -  | -  | -  | -  | -  | 2    | 1  | -  | 1  | 1   | 1         | 1  | 1  | -  | -  | -     | - |   |
|           | 37     | 26      | -  | -      | -   | -        | -  | -  | -  | -     | -  | -   | -  | -  | -  | 2  | 1  | -    | -  | -  | -  | -   | -         | -  | -  | -  | -  | -     | - | - |
|           | EW     | 24      | -  | -      | -   | -        | -  | -  | -  | -     | -  | -   | -  | -  | -  | -  | 2  | -    | 3  | 1  | 2  | -   | -         | -  | 2  | -  | -  | -     | - | - |
|           | 96     | 15      | -  | -      | -   | -        | -  | -  | 1  | 1     | -  | 2   | -  | -  | -  | -  | -  | 1    | 2  | 3  | 7  | 4   | 2         | 4  | 5  | -  | -  | -     | - |   |
|           | ROSA   | 8       | -  | -      | -   | -        | 1  | -  | -  | -     | -  | -   | -  | -  | -  | -  | -  | 1    | 3  | 1  | 4  | 2   | 1         | 1  | 1  | -  | -  | -     | - |   |
|           | 71     | 11      | -  | -      | -   | -        | -  | -  | -  | -     | -  | 2   | -  | -  | -  | -  | 2  | -    | 3  | 4  | 2  | 4   | 2         | 4  | 4  | -  | -  | -     | - |   |
|           | 55     | 14      | -  | -      | -   | -        | -  | -  | 2  | 5     | -  | 2   | -  | -  | -  | -  | 2  | -    | 2  | 5  | 3  | 3   | 6         | 4  | 4  | -  | -  | -     | - |   |
|           | 29     | 16      | -  | -      | -   | -        | 1  | -  | 1  | 2     | -  | 2   | -  | -  | -  | -  | 4  | 2    | 3  | 5  | 6  | 4   | 5         | 7  | 7  | -  | -  | -     | - |   |
| 52A       | 11     | -       | -  | -      | -   | -        | -  | 1  | 1  | -     | -  | -   | -  | -  | -  | 3  | 1  | 1    | 3  | 4  | 4  | 5   | 5         | 5  | -  | -  | -  | -     |   |   |
| 88        | 7      | -       | -  | -      | -   | -        | -  | 1  | 1  | -     | -  | -   | -  | -  | -  | 1  | -  | 3    | 3  | 3  | 3  | 5   | 4         | 4  | -  | -  | -  | -     |   |   |
| 92        | 13     | -       | -  | -      | -   | -        | -  | 1  | 3  | -     | 2  | -   | -  | -  | -  | 3  | -  | 1    | 6  | 4  | 4  | 4   | 5         | 5  | -  | -  | -  | -     |   |   |
| X2        | 16     | -       | -  | -      | -   | 1        | -  | -  | -  | -     | 2  | -   | -  | -  | -  | 2  | -  | 3    | 2  | 4  | 2  | 2   | 3         | 3  | -  | -  | -  | -     |   |   |
| Class III | K      | 52      | -  | -      | -   | -        | -  | -  | -  | -     | -  | -   | -  | -  | -  | -  | -  | -    | -  | -  | -  | -   | -         | -  | -  | 44 | 18 | -     |   |   |
|           | G1     | 89      | -  | -      | -   | -        | -  | -  | -  | -     | -  | -   | -  | -  | -  | -  | -  | -    | -  | -  | -  | -   | -         | -  | -  | 41 | 23 | -     |   |   |
|           | Twort  | 89      | -  | -      | -   | -        | -  | -  | -  | -     | -  | -   | -  | -  | -  | -  | -  | -    | -  | -  | -  | -   | -         | -  | -  | 7  | 8  | -     |   |   |

The values represent the number of shared non-database matching ORFs from the different pairs of *S. aureus* bacteriophages. The numbers in the top part (plain) and bottom part (italics) are derived from BLAST cutoff E values of  $10^{-4}$  and  $10^{-20}$  respectively. The phages are grouped according to size class: I (< 20 kbp), II (~ 40 kbp), and III (> 120 kbp) respectively. The number of non-database matching ORFs are shown beside the phage names.
