# Supplementary material
Source: PubMed Central journal article supplement (PMC556006)
Supplement: pnas_102_14_5174__4.pdf [file pnas_102_14_5174__4.pdf]

**Table 4. *S. aureus* bacteriophage annotations**

## Bacteriophage PT1028

| ORF | Start, nt | End, nt | Size, aa | Predicted function                                              | Representative similarity to proteins in database                | <i>E</i> value | Percent identity | Percent length of match | Accession no. |
|-----|-----------|---------|----------|-----------------------------------------------------------------|------------------------------------------------------------------|----------------|------------------|-------------------------|---------------|
| 7   | 27        | 680     | 217      |                                                                 | unknown [S. aureus subsp. aureus MRSA252]                        | 1.00E-120      | 100              | 100                     | CAG39402.1    |
| 10  | 733       | 1260    | 175      |                                                                 | unknown [S. aureus subsp. aureus MRSA252]                        | 3.30E-95       | 100              | 100                     | CAG39403.1    |
| 14  | 1263      | 1604    | 113      | C-terminal effector domain of the bipartite response regulators | unknown [S. aureus subsp. aureus MRSA252]                        | 1.40E-60       | 98               | 100                     | CAG39404.1    |
| 9   | 1601      | 2170    | 189      | Small terminase                                                 | putative Small terminase [S. aureus subsp. aureus MRSA252]       | 1.00E-103      | 98               | 100                     | CAG39405.1    |
| 26  | 3025      | 3207    | 60       |                                                                 | unknown [S. aureus subsp. aureus MRSA252]                        | 4.00E-28       | 100              | 100                     | CAG39407.1    |
| 11  | 3325      | 3837    | 170      |                                                                 | putative membrane protein [S. aureus subsp. aureus MRSA252]      | 2.70E-91       | 100              | 100                     | CAG39408.1    |
| 5   | 5396      | 4599    | 265      | Chromosome segregation                                          | Chromosome segregation ATPases [T. tengcongensis MB4]            | 1.40E-05       | 24               | 67                      | AAM24687.1    |
| 2   | 6634      | 5420    | 404      | Integrase                                                       | putative integrase [S. aureus subsp. aureus MRSA252]             | 0              | 97               | 100                     | CAG39389.1    |
| 6   | 7667      | 6933    | 244      | Transcription regulator                                         | possible transcriptional regulator [B. licheniformis ATCC 14580] | 6.10E-05       | 29               | 54                      | AAU25100.1    |
| 20  | 7808      | 8029    | 73       | DNA-binding                                                     | HTH DNA-binding protein [S. pyogenes MGAS10394]                  | 5.20E-09       | 38               | 86                      | AAT87942.1    |
| 19  | 8030      | 8302    | 90       |                                                                 | putative DNA-binding protein [S. aureus subsp. aureus MSSA476]   | 1.80E-08       | 36               | 88                      | CAG42677.1    |
| 21  | 8453      | 8662    | 69       |                                                                 | unknown [S. aureus]                                              | 5.80E-32       | 94               | 100                     | AAL04139.1    |
| 16  | 8665      | 8991    | 108      |                                                                 | unknown [S. aureus subsp. aureus MRSA252]                        | 3.40E-57       | 96               | 100                     | CAG39396.1    |
| 3   | 9056      | 9925    | 289      | DNA replication                                                 | putative replication protein [S. thermophilus]                   | 5.80E-11       | 25               | 85                      | CAB46557.2    |
| 1   | 9939      | 11648   | 569      | P-loop containing nucleotide triphosphate hydrolases            | unknown [S. aureus subsp. aureus Mu50]                           | 0              | 93               | 99                      | BAB58183.1    |
| 18  | 11017     | 10721   | 98       |                                                                 |                                                                  |                |                  |                         |               |
| 13  | 11960     | 12340   | 126      | Winged helix DNA-binding domain                                 | Orf12 [S. aureus]                                                | 2.40E-70       | 98               | 100                     | AAG29609.1    |
| 12  | 12337     | 12846   | 169      |                                                                 | Orf11 [S. aureus]                                                | 3.10E-15       | 95               | 23                      | AAG29608.1    |
| 4   | 13017     | 13820   | 267      |                                                                 | unknown [S. pyogenes MGAS8232]                                   | 6.40E-38       | 36               | 100                     | AAL97894.1    |
| 17  | 13807     | 14079   | 90       |                                                                 |                                                                  |                |                  |                         |               |
| 8   | 14081     | 14722   | 213      |                                                                 | Orf11 [S. aureus]                                                | 1.00E-114      | 95               | 100                     | AAG29608.1    |
| 15  | 15258     | 15599   | 113      |                                                                 | Orf10 [S. aureus]                                                | 2.40E-60       | 99               | 100                     | AAG29607.1    |

Bacteriophage 66

| ORF | Start (nt) | End (nt) | Size (aa) | Predicted Function               | Representative similarity to proteins in database                                                    | E-value              | % Identity | % Length of Match | Accession                |
|-----|------------|----------|-----------|----------------------------------|------------------------------------------------------------------------------------------------------|----------------------|------------|-------------------|--------------------------|
| 15  | 281        | 670      | 129       | Biofim-associated; Topoisomerase | biofilm-associated surface protein [S. aureus]<br>DNA topoisomerase IV subunit A [M. penetrans HF-2] | 2.50E-06<br>9.30E-06 | 28<br>28   | 100<br>94         | AAK38834.2<br>BAC44437.1 |
| 29  | 684        | 866      | 60        |                                  | unknown [S. aureus phage phiP68]                                                                     | 4.00E-28             | 100        | 100               | AAO83895.1               |
| 6   | 873        | 2099     | 408       | Major head                       | major head protein [S. aureus phage phiP68]                                                          | 0                    | 100        | 100               | AAO83894.1               |
| 47  | 1813       | 1953     | 46        |                                  |                                                                                                      |                      |            |                   |                          |
| 7   | 2114       | 3097     | 327       | Upper collar                     | upper collar protein [S. aureus phage phiP68]                                                        | 2.00E-140            | 100        | 76                | AAO83893.1               |
| 8   | 3090       | 3845     | 251       | Lower collar                     | lower collar protein [S. aureus phage phiP68]                                                        | 2.00E-142            | 100        | 100               | AAO83892.1               |
| 60  | 3418       | 3537     | 39        |                                  |                                                                                                      |                      |            |                   |                          |
| 2   | 3859       | 5802     | 647       | Minor structural protein         | minor structural protein [S. aureus phage phiP68]                                                    | 0                    | 99         | 100               | AAO83891.1               |
| 9   | 5814       | 6566     | 250       | Amidase                          | amidase [S. aureus phage phiP68]                                                                     | 9.00E-148            | 94         | 100               | AAO83890.1               |
| 10  | 6629       | 7306     | 225       | Minor tail                       | minor tail protein [S. aureus phage phiP68]                                                          | 4.00E-113            | 92         | 100               | AAO83888.1               |
| 12  | 7622       | 8074     | 150       | Minor tail                       | minor tail protein [S. aureus phage phiP68]                                                          | 2.30E-81             | 97         | 100               | AAO83888.1               |
| 3   | 8132       | 9895     | 587       | Tail                             | tail protein [S. aureus phage phiP68]                                                                | 0                    | 99         | 100               | AAO83887.1               |
| 13  | 9897       | 10319    | 140       | Holin                            | holin [S. aureus phage phiP68]                                                                       | 1.50E-74             | 100        | 100               | AAO83886.1               |
| 4   | 10270      | 11733    | 487       | Peptidoglycan hydrolase          | lysin beta subunit [Streptococcus phage C1]                                                          | 4.70E-07             | 22         | 69                | AAP42310.1               |
| 38  | 10741      | 10577    | 54        |                                  |                                                                                                      |                      |            |                   |                          |
| 51  | 11246      | 11383    | 45        |                                  |                                                                                                      |                      |            |                   |                          |
| 46  | 11635      | 11525    | 36        |                                  |                                                                                                      |                      |            |                   |                          |
| 1   | 14133      | 11848    | 761       | DNA polymerase                   | DNA-polymerase [S. aureus phage phiP68]                                                              | 0                    | 98         | 99                | AAO83884.1               |
| 5   | 15396      | 14149    | 415       | Encapsidation                    | putative encapsidation protein [S. aureus phage phiP68]                                              | 0                    | 100        | 91                | AAO83883.1               |
| 45  | 15463      | 15317    | 48        |                                  |                                                                                                      |                      |            |                   |                          |
| 11  | 15926      | 15444    | 160       |                                  | unknown [S. aureus phage phiP68]                                                                     | 1.50E-90             | 99         | 100               | AAO83882.1               |
| 14  | 16505      | 16092    | 137       |                                  | unknown [S. aureus phage phiP68]                                                                     | 5.60E-32             | 53         | 100               | AAO83880.1               |
| 31  | 16684      | 16508    | 58        |                                  | unknown [S. aureus phage phiP68]                                                                     | 1.20E-27             | 97         | 100               | AAO83879.1               |
| 16  | 17101      | 16733    | 122       | ssDNA-binding                    | putative single stranded DNA-binding protein [S. aureus phage phiP68]                                | 4.60E-64             | 98         | 100               | AAO83878.1               |
| 21  | 17361      | 17125    | 78        |                                  | unknown [S. aureus phage phiP68]                                                                     | 6.20E-31             | 79         | 100               | AAO83877.1               |
| 17  | 17678      | 17376    | 100       |                                  | unknown [S. aureus phage phiP68]                                                                     | 2.40E-53             | 98         | 100               | AAO83876.1               |
| 25  | 17868      | 17671    | 65        |                                  | unknown [S. aureus phage phiP68]                                                                     | 1.50E-30             | 98         | 100               | AAO83875.1               |

Bacteriophage 44AHJD

| ORF | Start (nt) | End (nt) | Size (aa) | Predicted Function                                            | Representative similarity to proteins in database                          | E-value   | % Identity | % Length of Match | Accession  |
|-----|------------|----------|-----------|---------------------------------------------------------------|----------------------------------------------------------------------------|-----------|------------|-------------------|------------|
| 113 | 199        | 600      | 133       | Amidase; Spore germination; Topoisomerase; Biofilm-associated | Spore germination protein IA [B. cereus ATCC 14579]                        | 3.10E-06  | 25         | 90                | AAP11636.1 |
|     |            |          |           |                                                               | N-acetylmuramoyl-L-alanine amidase, family 4 [E. faecalis V583]            | 4.10E-06  | 33         | 67                | AAO80118.1 |
|     |            |          |           |                                                               | DNA topoisomerase IV subunit A [M. penetrans HF-2]                         | 1.20E-05  | 28         | 92                | BAC44437.1 |
|     |            |          |           |                                                               | biofilm-associated surface protein [S. aureus]                             | 4.00E-28  | 29         | 100               | AAK38834.2 |
| 123 | 614        | 796      | 60        |                                                               | unknown [Staphylococcus phage 44AHJD]                                      | 4.00E-28  | 100        | 100               | AAO83873.1 |
| 39  | 1743       | 1883     | 46        |                                                               |                                                                            |           |            |                   |            |
| 7   | 2044       | 3027     | 327       | Upper collar                                                  | upper collar protein [Staphylococcus phage 44AHJD]                         | 2.00E-140 | 100        | 76                | AAO83871.1 |
| 53  | 3348       | 3467     | 39        |                                                               |                                                                            |           |            |                   |            |
| 2   | 3789       | 5732     | 647       | Minor structural protein                                      | minor structural protein [Staphylococcus phage 44AHJD]                     | 0         | 100        | 100               | AAO83869.1 |
| 46  | 4891       | 5019     | 42        |                                                               |                                                                            |           |            |                   |            |
| 9   | 5744       | 6496     | 250       | Amidase                                                       | amidase [Staphylococcus phage 44AHJD]                                      | 2.00E-156 | 100        | 100               | AAO83868.1 |
| 49  | 5784       | 5909     | 41        |                                                               |                                                                            |           |            |                   |            |
| 23  | 6494       | 6315     | 59        |                                                               |                                                                            |           |            |                   |            |
| 3   | 6626       | 8389     | 587       | Tail                                                          | tail protein [Staphylococcus phage 44AHJD]                                 | 0         | 100        | 100               | AAO83866.1 |
| 12  | 8391       | 8813     | 140       | Holin                                                         | holin [Staphylococcus phage 44AHJD]                                        | 1.50E-74  | 100        | 100               | AAO83865.1 |
| 4   | 8764       | 10227    | 487       | Lysin                                                         | lysine beta subunit [Streptococcus phage C1]                               | 8.00E-07  | 22         | 69                | AAP42310.1 |
| 28  | 9235       | 9071     | 54        |                                                               |                                                                            |           |            |                   |            |
| 40  | 9740       | 9877     | 45        |                                                               |                                                                            |           |            |                   |            |
| 19  | 9836       | 9630     | 68        |                                                               |                                                                            |           |            |                   |            |
| 36  | 10165      | 10019    | 48        |                                                               |                                                                            |           |            |                   |            |
| 1   | 12627      | 10342    | 761       | DNA polymerase                                                | DNA-polymerase [Staphylococcus phage 44AHJD]                               | 0         | 100        | 99                | AAO83863.1 |
| 27  | 12916      | 13080    | 54        |                                                               |                                                                            |           |            |                   |            |
| 44  | 12917      | 12783    | 44        |                                                               |                                                                            |           |            |                   |            |
| 35  | 13957      | 13811    | 48        |                                                               |                                                                            |           |            |                   |            |
| 10  | 14420      | 13938    | 160       |                                                               | unknown [Staphylococcus phage 44AHJD]                                      | 2.30E-91  | 99         | 100               | AAO83861.1 |
| 13  | 14996      | 14586    | 136       |                                                               | unknown [Staphylococcus phage 44AHJD]                                      | 1.20E-74  | 100        | 100               | AAO83859.1 |
| 25  | 15175      | 14999    | 58        |                                                               | unknown [Staphylococcus phage 44AHJD]                                      | 1.10E-28  | 100        | 100               | AAO83858.1 |
| 48  | 15340      | 15212    | 42        |                                                               |                                                                            |           |            |                   |            |
| 11  | 15593      | 15225    | 122       | ssDNA-binding                                                 | putative single stranded DNA-binding protein [Staphylococcus phage 44AHJD] | 1.60E-64  | 99         | 100               | AAO83857.1 |
| 16  | 15852      | 15616    | 78        |                                                               | unknown [Staphylococcus phage 44AHJD]                                      | 3.60E-39  | 100        | 100               | AAO83856.1 |
| 114 | 16172      | 15870    | 100       |                                                               | unknown [Staphylococcus phage 44AHJD]                                      | 2.10E-54  | 100        | 100               | AAO83855.1 |
| 121 | 16362      | 16165    | 65        |                                                               | unknown [Staphylococcus phage 44AHJD]                                      | 2.90E-31  | 100        | 100               | AAO83854.1 |

## Bacteriophage P68

| ORF | Start (nt) | End (nt) | Size (aa) | Predicted Function                         | Representative similarity to proteins in database                                                                                                                               | E-value                          | % Identity     | % Length of Match | Accession                              |
|-----|------------|----------|-----------|--------------------------------------------|---------------------------------------------------------------------------------------------------------------------------------------------------------------------------------|----------------------------------|----------------|-------------------|----------------------------------------|
| 15  | 278        | 679      | 133       | Amidase; Topoisomerase; Biofilm-associated | N-acetylmuramoyl-L-alanine amidase, family 4 [E. faecalis V583]<br>DNA topoisomerase IV subunit A [Mycoplasma penetrans HF-2]<br>biofilm-associated surface protein [S. aureus] | 4.10E-06<br>4.10E-06<br>1.20E-05 | 33<br>28<br>29 | 67<br>92<br>100   | AAO80118.1<br>BAC44437.1<br>AAK38834.2 |
| 25  | 693        | 875      | 60        |                                            | unknown [S. aureus phage phiP68]                                                                                                                                                | 4.00E-28                         | 100            | 100               | AAO83895.1                             |
| 7   | 882        | 2108     | 408       | Major capsid                               | major head protein [S. aureus phage phiP68]                                                                                                                                     | 0                                | 100            | 100               | AAO83894.1                             |
| 46  | 1822       | 1962     | 46        |                                            |                                                                                                                                                                                 |                                  |                |                   |                                        |
| 8   | 2123       | 3106     | 327       | Upper collar                               | upper collar protein [S. aureus phage phiP68]                                                                                                                                   | 2.00E-140                        | 100            | 76                | AAO83893.1                             |
| 9   | 3099       | 3854     | 251       | Lower collar                               | lower collar protein [S. aureus phage phiP68]                                                                                                                                   | 2.00E-142                        | 100            | 100               | AAO83892.1                             |
| 63  | 3427       | 3546     | 39        |                                            |                                                                                                                                                                                 |                                  |                |                   |                                        |
| 2   | 3868       | 5811     | 647       | Minor structural protein                   | minor structural protein [S. aureus phage phiP68]                                                                                                                               | 0                                | 100            | 100               | AAO83891.1                             |
| 10  | 5823       | 6575     | 250       | Amidase                                    | amidase [S. aureus phage phiP68]                                                                                                                                                | 2.00E-156                        | 100            | 100               | AAO83890.1                             |
| 57  | 5863       | 5988     | 41        |                                            |                                                                                                                                                                                 |                                  |                |                   |                                        |
| 5   | 6638       | 8083     | 481       | Minor tail                                 | minor tail protein [S. aureus phage phiP68]                                                                                                                                     | 0                                | 100            | 100               | AAO83888.1                             |
| 3   | 8141       | 9904     | 587       | Tail                                       | tail protein [S. aureus phage phiP68]                                                                                                                                           | 0                                | 100            | 100               | AAO83887.1                             |
| 13  | 9906       | 10328    | 140       | Holin                                      | holin [S. aureus phage phiP68]                                                                                                                                                  | 1.50E-74                         | 100            | 100               | AAO83886.1                             |
| 4   | 10279      | 11742    | 487       | Lysin                                      | lysine beta subunit [Streptococcus phage C1]                                                                                                                                    | 8.00E-07                         | 22             | 69                | AAP42310.1                             |
| 33  | 10750      | 10586    | 54        |                                            |                                                                                                                                                                                 |                                  |                |                   |                                        |
| 47  | 11255      | 11392    | 45        |                                            |                                                                                                                                                                                 |                                  |                |                   |                                        |
| 22  | 11351      | 11145    | 68        |                                            |                                                                                                                                                                                 |                                  |                |                   |                                        |
| 43  | 11680      | 11534    | 48        |                                            |                                                                                                                                                                                 |                                  |                |                   |                                        |
| 1   | 14142      | 11857    | 761       | DNA polymerase                             | DNA-polymerase [S. aureus phage phiP68]                                                                                                                                         | 0                                | 100            | 99                | AAO83884.1                             |
| 6   | 15405      | 14158    | 415       | Encapsidation                              | putative encapsidation protein [S. aureus phage phiP68]                                                                                                                         | 0                                | 100            | 91                | AAO83883.1                             |
| 42  | 15472      | 15326    | 48        |                                            |                                                                                                                                                                                 |                                  |                |                   |                                        |
| 11  | 15935      | 15453    | 160       |                                            | unknown [S. aureus phage phiP68]                                                                                                                                                | 2.30E-91                         | 99             | 100               | AAO83882.1                             |
| 14  | 16511      | 16101    | 136       |                                            | unknown [S. aureus phage phiP68]                                                                                                                                                | 1.20E-74                         | 100            | 100               | AAO83880.1                             |
| 30  | 16690      | 16514    | 58        |                                            | unknown [S. aureus phage phiP68]                                                                                                                                                | 1.10E-28                         | 100            | 100               | AAO83879.1                             |
| 56  | 16855      | 16727    | 42        |                                            |                                                                                                                                                                                 |                                  |                |                   |                                        |
| 12  | 17108      | 16740    | 122       | ssDNA-binding                              | putative single stranded DNA-binding protein [S. aureus phage phiP68]                                                                                                           | 7.00E-65                         | 100            | 100               | AAO83878.1                             |
| 19  | 17367      | 17131    | 78        |                                            | unknown [S. aureus phage phiP68]                                                                                                                                                | 3.60E-39                         | 100            | 100               | AAO83877.1                             |
| 16  | 17687      | 17385    | 100       |                                            | unknown [S. aureus phage phiP68]                                                                                                                                                | 2.10E-54                         | 100            | 100               | AAO83876.1                             |
| 23  | 17877      | 17680    | 65        |                                            | unknown [S. aureus phage phiP68]                                                                                                                                                | 2.90E-31                         | 100            | 100               | AAO83875.1                             |

## Bacteriophage 187

| ORF | Start (nt) | End (nt) | Size (aa) | Predicted Function | Representative similarity to proteins in database      | E-value   | % Identity | % Length of Match | Accession  |
|-----|------------|----------|-----------|--------------------|--------------------------------------------------------|-----------|------------|-------------------|------------|
| 30  | 117        | 557      | 146       | Small terminase    | small terminase [S. aureus phage phi 11]               | 1.10E-77  | 100        | 100               | AAL82257.1 |
| 5   | 478        | 1818     | 446       | Large terminase    | large terminase [S. aureus phage phi 11]               | 0         | 85.39      | 85                | AAL82258.1 |
| 3   | 1830       | 3275     | 481       | Portal             | portal protein [S. pyogenes MGAS10394]                 | 5.50E-93  | 41.85      | 42                | AAT87695.1 |
| 9   | 3259       | 4227     | 322       | Minor capsid       | putative minor head protein [C. difficile phage phiC2] | 1.20E-15  | 35.66      | 36                | AAS02083.1 |
| 21  | 4329       | 4952     | 207       | Scaffold           | scaffold protein [S. pyogenes MGAS10394]               | 3.10E-17  | 33.73      | 34                | AAT86182.1 |
| 11  | 4971       | 5882     | 303       | Major capsid       | putative major head protein [S. pyogenes SSI-1]        | 2.60E-33  | 32.24      | 32                | BAC63531.1 |
| 31  | 5972       | 6421     | 149       | Tail               | major tail protein [S. aureus phage phi 12]            | 3.70E-47  | 60.14      | 60                | AAL82319.1 |
| 42  | 6378       | 6764     | 128       |                    | unknown [S. aureus phage phi 11]                       | 4.00E-25  | 47.27      | 47                | AAL82264.1 |
| 107 | 6761       | 7075     | 104       |                    | unknown [S. aureus subsp. aureus Mu50]                 | 6.80E-21  | 43.43      | 43                | BAB57057.1 |
| 49  | 7065       | 7412     | 115       |                    | unknown [S. aureus phage phi 11]                       | 5.30E-31  | 58.41      | 58                | AAL82265.1 |
| 39  | 7425       | 7820     | 131       |                    | unknown [S. aureus subsp. aureus Mu50]                 | 7.80E-21  | 39.37      | 39                | BAB57059.1 |
| 22  | 7838       | 8491     | 217       | Major tail         | major tail protein [S. pyogenes MGAS10394]             | 1.10E-15  | 31.25      | 31                | AAT87691.1 |
| 43  | 8550       | 8930     | 126       |                    | unknown [S. aureus phage phi 11]                       | 1.20E-11  | 39.25      | 39                | AAL82268.1 |
| 47  | 8960       | 9310     | 116       |                    | unknown [S. aureus phage phi 11]                       | 2.30E-34  | 62.5       | 63                | AAL82269.1 |
| 1   | 9326       | 12433    | 1035      | Minor tail         | tape measure protein [S. aureus phage phi 11]          | 0         | 45.54      | 46                | AAL82270.1 |
| 36  | 11311      | 11715    | 134       |                    |                                                        |           |            |                   |            |
| 23  | 11514      | 10957    | 185       |                    |                                                        |           |            |                   |            |
| 102 | 11691      | 11530    | 53        |                    |                                                        |           |            |                   |            |
| 10  | 12446      | 13378    | 310       |                    | unknown [S. aureus subsp. aureus Mu50]                 | 8.60E-72  | 41.59      | 42                | BAB57064.1 |
| 4   | 13391      | 14788    | 465       | Endopeptidase      | endopeptidase [S. pyogenes MGAS10394]                  | 1.70E-22  | 23.89      | 24                | AAT86193.1 |
| 153 | 14241      | 14092    | 49        |                    |                                                        |           |            |                   |            |
| 19  | 14792      | 15484    | 230       |                    | unknown [Staphylococcus phage 187]                     | 7.00E-123 | 99.1       | 99                | AAM54031.1 |
| 8   | 15496      | 16539    | 347       | Lipolytic enzyme   | unknown [Staphylococcus phage 187]                     | 0         | 99.42      | 99                | AAM54031.1 |
| 6   | 16556      | 17827    | 423       | Minor capsid       | minor capsid protein [Bacteriophage phig1e]            | 3.20E-17  | 29.5       | 30                | CAA66748.1 |
| 138 | 17940      | 18062    | 40        |                    |                                                        |           |            |                   |            |
| 2   | 18348      | 20234    | 628       | Amidase            | cell wall hydrolase Ply187 [Staphylococcus phage 187]  | 0         | 99.84      | 100               | CAA69022.1 |
| 89  | 18418      | 18600    | 60        | Holin              | holin protein Hol187 [Staphylococcus phage 187]        | 1.10E-25  | 100        | 100               | CAA69023.1 |
| 95  | 19351      | 19148    | 67        |                    |                                                        |           |            |                   |            |
| 63  | 20384      | 20638    | 84        | Holin              | holin [S. aureus phage phi 13]                         | 1.50E-42  | 100        | 100               | AAL82376.1 |
| 16  | 20650      | 21405    | 251       | Amidase            | amidase [S. aureus phage phi 13]                       | 4.00E-153 | 100        | 100               | AAL82377.1 |
| 7   | 22943      | 21897    | 348       | Integrase          | integrase [S. aureus phage phi 11]                     | 0         | 97.99      | 98                | AAL82229.1 |
| 82  | 23056      | 23253    | 65        |                    | unknown [S. pyogenes MGAS8232]                         | 6.40E-10  | 46.05      | 46                | AAL98050.1 |

## Bacteriophage 187 (continued)

| ORF | Start (nt) | End (nt) | Size (aa) | Predicted Function           | Representative similarity to proteins in database                | E-value   | % Identity | % Length of Match | Accession  |
|-----|------------|----------|-----------|------------------------------|------------------------------------------------------------------|-----------|------------|-------------------|------------|
| 35  | 23657      | 23250    | 135       |                              |                                                                  |           |            |                   |            |
| 32  | 24088      | 23651    | 145       |                              | unknown [S. pneumoniae TIGR4]                                    | 2.20E-09  | 28.68      | 29                | AAK75994.1 |
| 18  | 24845      | 24120    | 241       |                              | unknown [C. perfringens str. 13]                                 | 2.70E-37  | 42.16      | 42                | BAB79844.1 |
| 26  | 25547      | 24873    | 224       | rRNA binding                 | Ribosomal protein L22 [V. vulnificus CMCP6]                      | 1.40E-05  | 26.52      | 27                | AAO08916.1 |
| 50  | 25896      | 25564    | 110       | Transcriptional Regulator    | transcriptional regulator, Cro/Ci family [E. faecalis V583]      | 3.40E-17  | 43.62      | 44                | AAO81775.1 |
| 51  | 26159      | 26353    | 64        | Repressor                    | cro [B. $\phi$ larkia bacteriophage BCJA1c]                      | 3.00E-07  | 47.37      | 47                | AAU85054.1 |
| 15  | 26353      | 27120    | 255       | Antirepressor                | similar to anti-repressor [S. aureus subsp. Aureus Mu50]         | 1.10E-89  | 88.24      | 88                | BAB57017.1 |
| 73  | 27121      | 27345    | 74        |                              | unknown [S. aureus phage phi 11]                                 | 2.00E-37  | 100        | 100               | AAL82236.1 |
| 100 | 27385      | 27555    | 56        |                              |                                                                  |           |            |                   |            |
| 129 | 27574      | 27705    | 43        |                              |                                                                  |           |            |                   |            |
| 74  | 27753      | 27544    | 69        |                              |                                                                  |           |            |                   |            |
| 17  | 27810      | 28562    | 250       | Antirepressor                | putative anti repressor [S. aureus subsp. Aureus MRSA252]        | 9.00E-124 | 90.8       | 91                | CAG41079.1 |
| 90  | 28578      | 28760    | 60        |                              |                                                                  |           |            |                   |            |
| 150 | 28844      | 28728    | 38        |                              |                                                                  |           |            |                   |            |
| 76  | 28953      | 28738    | 71        |                              | Imo1659 [Listeria monocytogenes]                                 | 1.80E-09  | 39.71      | 40                | CAC99737.1 |
| 40  | 29017      | 29280    | 87        | DNA-binding                  | putative DNA-binding protein [S. aureus subsp. Aureus MSSA476]   | 3.30E-37  | 84.71      | 85                | CAG42677.1 |
| 105 | 29293      | 29454    | 53        |                              | putative exported protein [S. aureus subsp. Aureus MSSA476]      | 5.20E-23  | 96.23      | 96                | CAG43717.1 |
| 162 | 29423      | 29313    | 36        |                              |                                                                  |           |            |                   |            |
| 60  | 29546      | 29806    | 86        |                              | unknown [S. aureus subsp. Aureus MSSA476]                        | 1.80E-43  | 96.51      | 97                | CAG43716.1 |
| 28  | 29821      | 30300    | 159       |                              | orf 16 [S. aureus prophage phiPV83]                              | 4.60E-84  | 98.74      | 99                | BAA97823.1 |
| 13  | 30300      | 31073    | 257       | AAA ATPase                   | unknown [S. aureus phage phi 11]                                 | 1.70E-56  | 42.8       | 43                | AAL82240.1 |
| 24  | 31104      | 31655    | 183       | ssDNA-binding                | ssb [S. aureus phage phi 11]                                     | 1.50E-61  | 63.04      | 63                | AAL82241.1 |
| 78  | 31444      | 31647    | 67        |                              | ORF19 [bacteriophage phi ETA]                                    | 1.10E-30  | 98.51      | 99                | BAA97605.1 |
| 20  | 31668      | 32360    | 230       |                              | phi PV83 orf 19-like protein [S. aureus phage phi 11]            | 8.00E-132 | 98.7       | 99                | AAL82242.1 |
| 12  | 32332      | 33135    | 267       | Replisome organizer          | putative replisome organizer [Lactococcus bacteriophage 4268]    | 3.40E-07  | 22.39      | 22                | AAM83050.1 |
| 14  | 33145      | 33918    | 257       | DNA replication protein DnaC | dnaC [S. aureus phage phi 13]                                    | 4.00E-129 | 87.45      | 87                | AAL82346.1 |
| 108 | 33912      | 34070    | 52        |                              | unknown [S. aureus subsp. Aureus Mu50]                           | 2.20E-21  | 90.38      | 90                | BAB57032.1 |
| 69  | 34083      | 34304    | 73        |                              | unknown [S. aureus temperate phage phiSLT]                       | 3.80E-36  | 98.63      | 99                | BAB21717.1 |
| 37  | 34315      | 34719    | 134       |                              | orf 22 [S. aureus prophage phiPV83]                              | 2.50E-72  | 97.01      | 97                | BAA97829.1 |
| 86  | 34724      | 34909    | 61        |                              | ORF26 [bacteriophage phi ETA]                                    | 7.60E-27  | 93.44      | 93                | BAA97612.1 |
| 61  | 34910      | 35167    | 85        | Transcriptional regulator    | Transcriptional regulator, Cro/Ci family [S. pyogenes MGAS10394] | 1.80E-06  | 38.98      | 39                | AAT87941.1 |
| 45  | 35179      | 35535    | 118       |                              | unknown [S. aureus phage phi 11]                                 | 2.20E-50  | 84.35      | 84                | AAL82249.1 |
| 64  | 35539      | 35781    | 80        |                              | unknown [S. aureus phage phi 11]                                 | 8.60E-41  | 96.2       | 96                | AAL82250.1 |

Bacteriophage 187 (continued)

| ORF | Start (nt) | End (nt) | Size (aa) | Predicted Function             | Representative similarity to proteins in database   | E-value  | % Identity | % Length of Match | Accession  |
|-----|------------|----------|-----------|--------------------------------|-----------------------------------------------------|----------|------------|-------------------|------------|
| 38  | 35796      | 36188    | 130       |                                | unknown [S. aureus subsp. Aureus MRSA252]           | 1.70E-71 | 100        | 100               | CAG40534.1 |
| 83  | 36185      | 36379    | 64        |                                | unknown [S. aureus subsp. aureus MRSA252]           | 2.10E-29 | 96.83      | 97                | CAG40533.1 |
| 48  | 36376      | 36723    | 115       | Sensor                         | possible sensor protein [S. aureus phage phi 13]    | 1.70E-58 | 95.65      | 96                | AAL82351.1 |
| 55  | 36739      | 37029    | 96        |                                | unknown [S. aureus subsp. aureus MSSA476]           | 1.20E-47 | 97.83      | 98                | CAG42692.1 |
| 62  | 37022      | 37270    | 82        |                                | orf 52 [S. aureus bacteriophage PVL]                | 6.70E-38 | 92.68      | 93                | BAA31925.1 |
| 25  | 37263      | 37796    | 177       | dUTPase                        | dUTP pyrophosphatase [S. aureus subsp. aureus Mu50] | 7.10E-85 | 91.53      | 92                | BAB58136.1 |
| 77  | 37833      | 38039    | 68        |                                | unknown [S. aureus subsp. aureus MRSA252]           | 6.70E-28 | 93.85      | 94                | CAG41056.1 |
| 41  | 38036      | 38422    | 128       |                                | orf31 [S. aureus prophage phiPV83]                  | 3.10E-65 | 95.28      | 95                | BAA97838.1 |
| 98  | 38419      | 38592    | 57        | Transcriptional activator RinB | rinB [S. aureus phage phi 11]                       | 1.20E-22 | 91.23      | 91                | AAL82255.1 |
| 44  | 38593      | 38955    | 120       |                                |                                                     |          |            |                   |            |
| 116 | 38956      | 39102    | 48        |                                | unknown [S. aureus subsp. aureus Mu50]              | 6.30E-08 | 96.43      | 96                | BAB57045.1 |
| 34  | 39126      | 39548    | 140       | Transcriptional activator RinA | rinA [S. aureus phage phi 11]                       | 2.60E-74 | 97.86      | 98                | AAL82256.1 |

## Bacteriophage 69

| ORF | Start (nt) | End (nt) | Size (aa) | Predicted Function       | Representative similarity to proteins in database      | E-value  | % Identity | % Length of Match | Accession  |
|-----|------------|----------|-----------|--------------------------|--------------------------------------------------------|----------|------------|-------------------|------------|
| 25  | 25         | 540      | 171       | Small terminase          | small terminase [S. aureus phage phi 11]               | 5.00E-77 | 99         | 85                | AAL82257.1 |
| 8   | 461        | 1804     | 447       | Large terminase          | large terminase [S. aureus phage phi 11]               | 0        | 100        | 100               | AAL82258.1 |
| 6   | 1815       | 3350     | 511       | Portal                   | portal protein [S. pyogenes MGAS10394]                 | 3.50E-93 | 41         | 95                | AAT87695.1 |
| 14  | 3357       | 4352     | 331       | Minor head               | putative minor head protein [C. difficile phage phiC2] | 3.80E-12 | 32         | 40                | AAS02083.1 |
| 94  | 4425       | 4595     | 56        |                          | unknown [S. aureus subsp. aureus Mu50]                 | 4.70E-24 | 98         | 100               | BAB57051.1 |
| 22  | 4704       | 5324     | 206       | Penicillin binding       | penicillin-binding protein [B. cereus ATCC 10987]      | 2.20E-07 | 30         | 66                | AAS40607.1 |
| 22  | 4704       | 5324     | 206       | Minor structural protein | minor structural protein 2 [Bacteriophage Tuc2009]     | 1.10E-06 | 24         | 100               | AAK19862.1 |
| 11  | 5338       | 6312     | 324       | Major capsid             | head protein [S. aureus phage phi 11]                  | 0        | 100        | 100               | AAL82262.1 |
| 55  | 6334       | 6621     | 95        |                          | unknown [S. aureus subsp. aureus Mu50]                 | 3.70E-46 | 97         | 100               | BAB57055.1 |
| 44  | 6630       | 6962     | 110       |                          | unknown [S. aureus subsp. aureus Mu50]                 | 1.30E-56 | 100        | 100               | BAB57056.1 |
| 40  | 7261       | 7608     | 115       |                          | unknown [S. aureus subsp. aureus Mu50]                 | 5.80E-62 | 99         | 100               | BAB57058.1 |
| 36  | 7620       | 8003     | 127       |                          | unknown [S. aureus subsp. aureus Mu50]                 | 6.40E-71 | 100        | 100               | BAB57059.1 |
| 23  | 8022       | 8603     | 193       | Major tail               | major tail protein [S. pyogenes MGAS10394]             | 1.30E-19 | 34         | 82                | AAT87691.1 |
| 130 | 8161       | 8265     | 34        |                          |                                                        |          |            |                   |            |
| 38  | 8665       | 9030     | 121       |                          | unknown [S. aureus phage phi 11]                       | 2.80E-61 | 100        | 100               | AAL82268.1 |
| 1   | 9421       | 12888    | 1155      | Tape measure protein     | tape measure protein [S. aureus phage phi 11]          | 0        | 99         | 78                | AAL82270.1 |
| 128 | 10751      | 10611    | 46        |                          |                                                        |          |            |                   |            |
| 12  | 12901      | 13848    | 315       |                          | ORF54 [bacteriophage phi ETA]                          | 1.40E-21 | 33         | 60                | BAA97640.1 |
| 3   | 13857      | 15758    | 633       | Endopeptidase            | phage endopeptidase [S. pyogenes MGAS10394]            | 2.20E-15 | 24         | 39                | AAT86193.1 |
| 70  | 15571      | 15780    | 69        |                          |                                                        |          |            |                   |            |
| 2   | 15773      | 17683    | 636       | Minor structural protein | minor structural protein [S. aureus phage phiP68]      | 4.20E-38 | 27         | 76                | AAO83891.1 |
| 162 | 16773      | 16889    | 38        |                          |                                                        |          |            |                   |            |
| 5   | 17683      | 19506    | 607       |                          | ORF57 [bacteriophage phi ETA]                          | 0        | 80         | 100               | BAA97643.1 |
| 35  | 19506      | 19883    | 125       |                          | ORF58 [bacteriophage phi ETA]                          | 2.10E-61 | 93         | 100               | BAA97644.1 |
| 86  | 19884      | 20060    | 58        |                          | ORF59 [bacteriophage phi ETA]                          | 5.00E-26 | 93         | 98                | BAA97645.1 |
| 48  | 20101      | 20400    | 99        |                          | unknown [S. aureus temperate phage phiSLT]             | 1.90E-31 | 64         | 100               | BAB21751.1 |
| 4   | 20537      | 22435    | 632       | Amidase                  | cell wall hydrolase [S. aureus phage phi 11]           | 0        | 100        | 100               | AAL82277.1 |
| 103 | 20918      | 20769    | 49        |                          |                                                        |          |            |                   |            |
| 9   | 22448      | 23620    | 390       | Tail fiber               | tail fiber [S. aureus phage phi 11]                    | 0        | 99         | 100               | AAL82278.1 |
| 33  | 23625      | 24020    | 131       |                          | ORF63 [bacteriophage phi ETA]                          | 2.60E-69 | 96         | 100               | BAA97649.1 |
| 28  | 24076      | 24513    | 145       | Holin                    | holin [S. aureus subsp. aureus Mu50]                   | 8.70E-75 | 97         | 100               | BAB57074.1 |
| 7   | 24494      | 25939    | 481       | Amidase                  | amidase [S. aureus phage phi 11]                       | 0        | 99         | 100               | AAL82281.1 |



Bacteriophage 69 (continued)

| ORF | Start (nt) | End (nt) | Size (aa) | Predicted Function           | Representative similarity to proteins in database           | E-value   | % Identity | % Length of Match | Accession  |
|-----|------------|----------|-----------|------------------------------|-------------------------------------------------------------|-----------|------------|-------------------|------------|
| 163 | 24852      | 24959    | 35        | Amidase                      | amidase [bacteriophage 80 alpha]                            | 1.40E-05  | 79         | 82                | AAB39699.1 |
| 10  | 27875      | 26829    | 348       | Integrase                    | integrase [S. aureus phage phi 11]                          | 0         | 98         | 100               | AAL82229.1 |
| 75  | 27987      | 28187    | 66        | Excisionase                  | excisionase [S. aureus phage phi 11]                        | 7.70E-32  | 100        | 100               | AAL82230.1 |
| 13  | 29029      | 28124    | 301       |                              | unknown [S. aureus phage phi 11]                            | 1.00E-172 | 100        | 100               | AAL82231.1 |
| 96  | 29336      | 29169    | 55        |                              | unknown [S. aureus phage phi 12]                            | 7.30E-25  | 100        | 98                | AAL82284.1 |
| 19  | 30125      | 29406    | 239       | Repressor                    | ci-like repressor [S. aureus phage phi 11]                  | 3.00E-133 | 99         | 100               | AAL82233.1 |
| 69  | 30267      | 30485    | 72        | Repressor; DNA-binding       | cro-like repressor [S. aureus phage phi 11]                 | 2.30E-36  | 100        | 100               | AAL82234.1 |
| 16  | 30501      | 31289    | 262       | Antirepressor                | anti-repressor [S. aureus phage phi 11]                     | 6.00E-144 | 98         | 99                | AAL82235.1 |
| 77  | 31306      | 31500    | 64        |                              | unknown [S. aureus subsp. aureus MRSA252]                   | 2.70E-08  | 52         | 100               | CAG41078.1 |
| 39  | 31851      | 31495    | 118       |                              | unknown [E. faecalis V583]                                  | 8.00E-16  | 38         | 100               | AAO82542.1 |
| 37  | 31901      | 32092    | 63        |                              |                                                             |           |            |                   |            |
| 43  | 32321      | 32094    | 75        |                              | unknown [LactoB. bacteriophage phi adh]                     | 5.70E-08  | 38         | 94                | CAB52488.1 |
| 45  | 32380      | 32700    | 106       |                              | unknown [S. aureus subsp. aureus MSSA476]                   | 1.80E-58  | 99         | 100               | CAG43718.1 |
| 100 | 32697      | 32858    | 53        |                              | putative exported protein [S. aureus subsp. aureus MRSA252] | 2.00E-22  | 94         | 100               | CAG41074.1 |
| 50  | 32950      | 33210    | 86        |                              | unknown [S. aureus subsp. aureus MSSA476]                   | 9.90E-42  | 92         | 100               | CAG43716.1 |
| 65  | 33220      | 33441    | 73        |                              | unknown [S. aureus subsp. aureus Mu50]                      | 9.20E-22  | 63         | 100               | BAB57024.1 |
| 15  | 33434      | 34222    | 262       |                              | ORF17 [bacteriophage phi ETA]                               | 1.70E-99  | 67         | 98                | BAA97603.1 |
| 24  | 34251      | 34802    | 183       | ssDNA-binding                | ssb [S. aureus phage phi 11]                                | 5.80E-61  | 63         | 100               | AAL82241.1 |
| 160 | 34433      | 34314    | 39        |                              |                                                             |           |            |                   |            |
| 76  | 34597      | 34794    | 65        |                              | ORF19 [bacteriophage phi ETA]                               | 1.50E-27  | 94         | 100               | BAA97605.1 |
| 20  | 34815      | 35480    | 221       |                              | ORF20 [bacteriophage phi ETA]                               | 4.00E-127 | 98         | 100               | BAA97606.1 |
| 51  | 35482      | 35811    | 109       |                              |                                                             |           |            |                   |            |
| 31  | 36076      | 35666    | 136       |                              |                                                             |           |            |                   |            |
| 18  | 36139      | 36909    | 256       | DNA replication              | DnaA analog [Bacteriophage LL-H]                            | 3.80E-48  | 38         | 100               | AAL77546.1 |
| 17  | 36919      | 37698    | 259       | DNA replication protein DnaC | dnaC [S. aureus phage phi 13]                               | 2.00E-149 | 99         | 100               | AAL82346.1 |
| 101 | 37692      | 37853    | 53        |                              | unknown [S. aureus subsp. aureus Mu50]                      | 1.50E-06  | 50         | 98                | BAB57032.1 |
| 64  | 37866      | 38087    | 73        |                              | ORF24 [bacteriophage phi ETA]                               | 1.30E-36  | 100        | 100               | BAA97610.1 |
| 32  | 38097      | 38501    | 134       |                              | ORF25 [bacteriophage phi ETA]                               | 4.70E-71  | 93         | 100               | BAA97611.1 |
| 82  | 38506      | 38691    | 61        |                              | ORF26 [bacteriophage phi ETA]                               | 3.20E-25  | 87         | 100               | BAA97612.1 |
| 47  | 38692      | 38997    | 101       |                              | unknown [S. agalactiae NEM316]                              | 2.80E-06  | 33         | 91                | CAD45858.1 |
| 97  | 39125      | 39289    | 54        |                              | unknown [S. aureus phage phi 11]                            | 2.60E-06  | 100        | 42                | AAL82249.1 |
| 58  | 39246      | 39482    | 78        |                              | unknown [S. aureus subsp. aureus MRSA252]                   | 8.70E-25  | 68         | 100               | CAG41062.1 |
| 62  | 39486      | 39728    | 80        |                              | unknown [S. aureus subsp. aureus MRSA252]                   | 2.90E-41  | 96         | 100               | CAG41061.1 |

Bacteriophage 69 (continued)

| ORF | Start (nt) | End (nt) | Size (aa) | Predicted Function             | Representative similarity to proteins in database | E-value  | % Identity | % Length of Match | Accession  |
|-----|------------|----------|-----------|--------------------------------|---------------------------------------------------|----------|------------|-------------------|------------|
| 60  | 39740      | 39997    | 85        |                                | orf 52 [S. aureus bacteriophage PVL]              | 2.70E-39 | 98         | 96                | BAA31925.1 |
| 79  | 39984      | 40154    | 56        |                                |                                                   |          |            |                   |            |
| 26  | 40147      | 40653    | 168       |                                | ORF34 [bacteriophage phi ETA]                     | 2.80E-61 | 71         | 100               | BAA97620.1 |
| 89  | 40690      | 40863    | 57        |                                | unknown [S. aureus subsp. aureus MSSA476]         | 6.50E-26 | 98         | 100               | CAG42695.1 |
| 72  | 40880      | 41086    | 68        |                                | unknown [S. aureus subsp. aureus Mu50]            | 1.50E-32 | 99         | 100               | BAB57039.1 |
| 71  | 41083      | 41286    | 67        |                                | unknown [S. aureus subsp. aureus Mu50]            | 1.50E-32 | 100        | 100               | BAB57041.1 |
| 61  | 41279      | 41515    | 78        |                                | unknown [S. aureus subsp. aureus Mu50]            | 1.20E-39 | 99         | 100               | BAB57042.1 |
| 34  | 41508      | 41894    | 128       |                                | orf31 [S. aureus prophage phiPV83]                | 4.30E-67 | 99         | 99                | BAA97838.1 |
| 90  | 41891      | 42064    | 57        | Transcriptional activator RinB | rinB [S. aureus phage phi 11]                     | 1.40E-23 | 93         | 100               | AAL82255.1 |
| 120 | 42065      | 42211    | 48        |                                | unknown [S. aureus subsp. aureus Mu50]            | 1.30E-08 | 97         | 60                | BAB57045.1 |
| 30  | 42226      | 42645    | 139       | Transcriptional activator RinA | rinA [S. aureus phage phi 11]                     | 3.10E-19 | 38         | 96                | AAL82256.1 |

## Bacteriophage 53

| ORF | Start (nt) | End (nt) | Size (aa) | Predicted Function       | Representative similarity to proteins in database      | E-value  | % Identity | % Length of Match | Accession  |
|-----|------------|----------|-----------|--------------------------|--------------------------------------------------------|----------|------------|-------------------|------------|
| 28  | 156        | 596      | 146       | Small terminase          | small terminase [S. aureus phage phi 11]               | 3.30E-77 | 99         | 100               | AAL82257.1 |
| 9   | 517        | 1860     | 447       | Large terminase          | large terminase [S. aureus phage phi 11]               | 0        | 99         | 100               | AAL82258.1 |
| 114 | 698        | 838      | 46        |                          |                                                        |          |            |                   |            |
| 6   | 1871       | 3406     | 511       | Portal                   | Portal protein [S. pyogenes MGAS10394]                 | 1.20E-93 | 41         | 95                | AAT87695.1 |
| 14  | 3413       | 4408     | 331       | Head morphogenesis       | putative minor head protein [C. difficile phage phiC2] | 3.80E-12 | 32         | 40                | AAS02083.1 |
| 96  | 4481       | 4651     | 56        |                          | unknown [S. aureus subsp. aureus Mu50]                 | 2.30E-23 | 96         | 100               | BAB57051.1 |
| 23  | 4760       | 5380     | 206       | Penicillin binding       | penicillin-binding protein [B. cereus ATCC 10987]      | 1.30E-07 | 30         | 66                | AAS40607.1 |
| 23  | 4760       | 5380     | 206       | Minor structural protein | minor structural protein 2 [Bacteriophage Tuc2009]     | 2.20E-07 | 25         | 100               | AAK19862.1 |
| 11  | 5394       | 6368     | 324       | Major capsid             | head protein [S. aureus phage phi 11]                  | 0        | 99         | 100               | AAL82262.1 |
| 57  | 6390       | 6677     | 95        |                          | unknown [S. aureus subsp. aureus Mu50]                 | 4.00E-48 | 100        | 100               | BAB57055.1 |
| 48  | 6686       | 7018     | 110       |                          | unknown [S. aureus subsp. aureus Mu50]                 | 1.30E-56 | 100        | 100               | BAB57056.1 |
| 45  | 7317       | 7664     | 115       |                          | unknown [S. aureus subsp. aureus Mu50]                 | 5.80E-62 | 99         | 100               | BAB57058.1 |
| 38  | 7676       | 8059     | 127       |                          | unknown [S. aureus subsp. aureus Mu50]                 | 1.90E-70 | 99         | 100               | BAB57059.1 |
| 25  | 8078       | 8659     | 193       | Major tail               | Major tail protein [S. pyogenes MGAS10394]             | 1.30E-19 | 35         | 82                | AAT87691.1 |
| 131 | 8217       | 8321     | 34        |                          |                                                        |          |            |                   |            |
| 40  | 8721       | 9086     | 121       |                          | unknown [S. aureus phage phi 11]                       | 1.10E-60 | 99         | 100               | AAL82268.1 |
| 46  | 9116       | 9460     | 114       |                          | unknown [S. aureus phage phi 11]                       | 6.40E-61 | 100        | 100               | AAL82269.1 |
| 1   | 9477       | 12941    | 1154      | Tape measure protein     | tape measure protein [S. aureus phage phi 11]          | 0        | 95         | 78                | AAL82270.1 |
| 128 | 10807      | 10667    | 46        |                          |                                                        |          |            |                   |            |
| 12  | 12954      | 13901    | 315       |                          | ORF54 [bacteriophage phi ETA]                          | 3.20E-21 | 32         | 60                | BAA97640.1 |
| 157 | 13604      | 13485    | 39        |                          |                                                        |          |            |                   |            |
| 3   | 13910      | 15811    | 633       | Endopeptidase            | Phage endopeptidase [S. pyogenes MGAS10394]            | 2.20E-15 | 24         | 39                | AAT86193.1 |
| 74  | 15624      | 15833    | 69        |                          |                                                        |          |            |                   |            |
| 2   | 15826      | 17736    | 636       | Minor structural protein | minor structural protein [S. aureus phage phiP68]      | 2.10E-37 | 27         | 76                | AAO83891.1 |
| 161 | 16826      | 16942    | 38        |                          |                                                        |          |            |                   |            |
| 5   | 17736      | 19559    | 607       |                          | ORF57 [bacteriophage phi ETA]                          | 0        | 82         | 100               | BAA97643.1 |
| 70  | 19033      | 19254    | 73        |                          |                                                        |          |            |                   |            |
| 37  | 19559      | 19936    | 125       |                          | ORF58 [bacteriophage phi ETA]                          | 6.10E-61 | 93         | 100               | BAA97644.1 |
| 88  | 19937      | 20119    | 60        |                          | ORF59 [bacteriophage phi ETA]                          | 8.40E-26 | 91         | 95                | BAA97645.1 |
| 192 | 20119      | 20220    | 33        |                          |                                                        |          |            |                   |            |
| 52  | 20159      | 20458    | 99        |                          | unknown [S. aureus temperate phage phiSLT]             | 7.60E-52 | 100        | 100               | BAB21751.1 |
| 4   | 20595      | 22493    | 632       | Peptidoglycan hydrolase  | cell wall hydrolase [S. aureus phage phi 11]           | 0        | 99         | 100               | AAL82277.1 |

Bacteriophage 53 (continued)

| ORF | Start (nt) | End (nt) | Size (aa) | Predicted Function                | Representative similarity to proteins in database                              | E-value   | % Identity | % Length of Match | Accession  |
|-----|------------|----------|-----------|-----------------------------------|--------------------------------------------------------------------------------|-----------|------------|-------------------|------------|
| 10  | 22506      | 23678    | 390       | Tail fiber                        | tail fiber [S. aureus phage phi 11]                                            | 0         | 99         | 100               | AAL82278.1 |
| 98  | 22708      | 22580    | 42        |                                   |                                                                                |           |            |                   |            |
| 34  | 23684      | 24079    | 131       |                                   | ORF63 [bacteriophage phi ETA]                                                  | 9.10E-70  | 97         | 100               | BAA97649.1 |
| 51  | 24135      | 24437    | 100       | Holin                             | holin [S. aureus temperate phage phiSLT]                                       | 4.90E-51  | 100        | 100               | BAB21752.1 |
| 7   | 24449      | 25903    | 484       | Amidase                           | amidase [S. aureus subsp. Aureus MRSA252]                                      | 0         | 100        | 100               | CAG40495.1 |
| 180 | 25569      | 25676    | 35        |                                   |                                                                                |           |            |                   |            |
| 16  | 26518      | 27354    | 278       |                                   |                                                                                |           |            |                   |            |
| 8   | 29029      | 27644    | 461       | Integrase; Recombinase; Resolvase | site-specific recombinase for integration and excision [bacteriophage phi-105] | 8.20E-62  | 34         | 100               | BAA36658.1 |
| 89  | 29138      | 29317    | 59        | Excisionase                       | excisionase [S. aureus subsp. Aureus Mu50]                                     | 3.80E-26  | 97         | 100               | BAB57010.1 |
| 13  | 30229      | 29297    | 310       |                                   | unknown [S. aureus subsp. Aureus Mu50]                                         | 5.00E-173 | 97         | 100               | BAB57011.1 |
| 103 | 30536      | 30369    | 55        |                                   | unknown [S. aureus phage phi 12]                                               | 7.30E-25  | 100        | 98                | AAL82284.1 |
| 20  | 31325      | 30606    | 239       | Repressor                         | ci-like repressor [S. aureus phage phi 11]                                     | 1.00E-132 | 99         | 100               | AAL82233.1 |
| 73  | 31467      | 31685    | 72        | Repressor; DNA-binding            | cro-like repressor [S. aureus phage phi 11]                                    | 2.30E-36  | 100        | 100               | AAL82234.1 |
| 17  | 31701      | 32489    | 262       | Antirepressor                     | anti-repressor [S. aureus phage phi 11]                                        | 8.00E-144 | 98         | 99                | AAL82235.1 |
| 81  | 32506      | 32700    | 64        |                                   | unknown [S. aureus subsp. Aureus MRSA252]                                      | 5.60E-06  | 48         | 100               | CAG40551.1 |
| 62  | 32753      | 32929    | 58        |                                   | orf 10 [S. aureus prophage phiPV83]                                            | 1.30E-21  | 88         | 100               | BAA97817.1 |
| 64  | 33134      | 32904    | 76        |                                   | orf 11 [S. aureus prophage phiPV83]                                            | 1.70E-36  | 97         | 100               | BAA97818.1 |
| 130 | 33193      | 33321    | 42        |                                   |                                                                                |           |            |                   |            |
| 83  | 33314      | 33475    | 53        |                                   | putative exported protein [S. aureus subsp. Aureus MSSA476]                    | 3.80E-21  | 89         | 100               | CAG43717.1 |
| 176 | 33444      | 33334    | 36        |                                   |                                                                                |           |            |                   |            |
| 54  | 33567      | 33827    | 86        |                                   | ORF15 [bacteriophage phi ETA]                                                  | 1.20E-44  | 98         | 100               | BAA97601.1 |
| 71  | 33837      | 34058    | 73        |                                   | ORF16 [bacteriophage phi ETA]                                                  | 2.70E-21  | 63         | 100               | BAA97602.1 |
| 24  | 34051      | 34674    | 207       | Topoisomerase I                   | prophage pi2 protein 11, topoisomerase [L. lactis subsp. Lactis Il1403]        | 3.00E-20  | 36         | 85                | AAK05116.1 |
| 30  | 34674      | 35102    | 142       | ssDNA-binding                     | single strand DNA-binding protein [S. aureus prophage phiPV83]                 | 1.60E-76  | 98         | 100               | BAA97825.1 |
| 21  | 35116      | 35790    | 224       |                                   | unknown [S. aureus subsp. Aureus Mu50]                                         | 3.00E-129 | 98         | 100               | BAB57028.1 |
| 162 | 35787      | 35903    | 38        |                                   | 77ORF151 [Bacteriophage 77]                                                    | 6.80E-13  | 100        | 100               | AAR87940.1 |
| 19  | 36818      | 37588    | 256       | DNA replication                   | DnaA analog [Bacteriophage LL-H]                                               | 2.90E-40  | 38         | 100               | AAL77546.1 |
| 18  | 37598      | 38377    | 259       | DNA replication protein DnaC      | dnaC [S. aureus phage phi 13]                                                  | 9.00E-151 | 100        | 100               | AAL82346.1 |
| 108 | 38371      | 38529    | 52        |                                   | unknown [S. aureus subsp. Aureus Mu50]                                         | 2.20E-21  | 90         | 100               | BAB57032.1 |
| 66  | 38542      | 38763    | 73        |                                   | ORF24 [bacteriophage phi ETA]                                                  | 5.00E-36  | 99         | 100               | BAA97610.1 |
| 33  | 38773      | 39180    | 135       | Endodeoxyribonuclease RusA        | unknown [S. aureus subsp. Aureus N315]                                         | 1.60E-71  | 94         | 99                | BAB43067.1 |
| 86  | 39180      | 39365    | 61        |                                   | ORF26 [bacteriophage phi ETA]                                                  | 5.80E-27  | 93         | 100               | BAA97612.1 |
| 41  | 39366      | 39725    | 119       | DNA-binding                       | putative DNA-binding protein [S. aureus subsp. Aureus MSSA476]                 | 1.20E-11  | 37         | 100               | CAG42686.1 |

Bacteriophage 53 (continued)

| ORF | Start (nt) | End (nt) | Size (aa) | Predicted Function             | Representative similarity to proteins in database   | E-value  | % Identity | % Length of Match | Accession  |
|-----|------------|----------|-----------|--------------------------------|-----------------------------------------------------|----------|------------|-------------------|------------|
| 61  | 39725      | 39979    | 84        |                                | unknown [S. aureus subsp. Aureus MRSA252]           | 3.10E-43 | 99         | 100               | CAG40537.1 |
| 60  | 39985      | 40227    | 80        |                                | unknown [S. aureus subsp. aureus MRSA252]           | 2.10E-39 | 94         | 100               | CAG41061.1 |
| 32  | 40242      | 40643    | 133       |                                | unknown [S. aureus subsp. aureus MSSA476]           | 8.70E-57 | 81         | 100               | CAG42690.1 |
| 44  | 40640      | 40987    | 115       | Sensor                         | possible sensor protein [S. aureus phage phi 13]    | 2.80E-56 | 93         | 100               | AAL82351.1 |
| 49  | 40984      | 41292    | 102       |                                | unknown [S. aureus subsp. aureus MSSA476]           | 5.70E-52 | 96         | 100               | CAG42692.1 |
| 63  | 41285      | 41521    | 78        |                                | unknown [S. aureus subsp. aureus MSSA476]           | 1.30E-36 | 96         | 100               | CAG42693.1 |
| 26  | 41526      | 42038    | 170       | dUTPase                        | dUTP pyrophosphatase [S. aureus subsp. aureus Mu50] | 5.50E-68 | 79         | 100               | BAB58136.1 |
| 78  | 42075      | 42281    | 68        |                                | unknown [S. aureus subsp. aureus MRSA252]           | 4.20E-30 | 93         | 100               | CAG41056.1 |
| 76  | 42278      | 42481    | 67        |                                |                                                     |          |            |                   |            |
| 50  | 42474      | 42710    | 78        |                                | unknown [S. aureus subsp. aureus Mu50]              | 1.30E-36 | 94         | 100               | BAB57042.1 |
| 35  | 42703      | 43089    | 128       |                                | orf31 [S. aureus prophage phiPV83]                  | 4.30E-67 | 99         | 99                | BAA97838.1 |
| 93  | 43086      | 43259    | 57        | Transcriptional activator RinB | rinB [S. aureus phage phi 11]                       | 6.70E-23 | 91         | 100               | AAL82255.1 |
| 120 | 43260      | 43406    | 48        |                                | unknown [S. aureus subsp. aureus Mu50]              | 6.30E-08 | 96         | 58                | BAB57045.1 |
| 31  | 43430      | 43852    | 140       | Transcriptional activator RinA | rinA [S. aureus phage phi 11]                       | 3.10E-75 | 99         | 100               | AAL82256.1 |

## Bacteriophage 85

| ORF | Start (nt) | End (nt) | Size (aa) | Predicted Function                 | Representative similarity to proteins in database                                                     | E-value   | % Identity | % Length of Match | Accession  |
|-----|------------|----------|-----------|------------------------------------|-------------------------------------------------------------------------------------------------------|-----------|------------|-------------------|------------|
| 28  | 152        | 646      | 164       | Small terminase                    | putative small terminase [S. aureus subsp. aureus MRSA252]                                            | 5.50E-35  | 46         | 100               | CAG39405.1 |
| 8   | 649        | 1944     | 431       | Large terminase                    | putative terminase, large subunit - phage associated [S. pyogenes M1 GAS]                             | 3.00E-172 | 71         | 94                | AAK33879.1 |
| 6   | 1955       | 3493     | 512       | Portal                             | portal protein [S. pyogenes MGAS10394]                                                                | 5.10E-92  | 40         | 96                | AAT87695.1 |
| 12  | 3611       | 4495     | 294       | Minor head                         | putative minor head protein [C. difficile phage phiC2]                                                | 3.20E-12  | 32         | 45                | AAS02083.1 |
| 98  | 4568       | 4738     | 56        |                                    | unknown [S. aureus subsp. aureus Mu50]                                                                | 2.10E-24  | 100        | 100               | BAB57051.1 |
| 24  | 4873       | 5487     | 204       | Structural; Immunoglobulin binding | putative scaffold protein [LactoB. johnsonii prophage Lj965]                                          | 3.70E-12  | 29         | 100               | AAR27459.1 |
|     |            |          |           |                                    | EMML15=M-like immunoglobulin-binding protein [S. pyogenes, EF1949, type M15, Peptide Partial, 217 aa] | 1.50E-08  | 27         | 67                | AAB31196.1 |
| 10  | 5501       | 6475     | 324       | Major capsid                       | head protein [S. aureus phage phi 11]                                                                 | 0         | 99         | 100               | AAL82262.1 |
| 59  | 6497       | 6784     | 95        |                                    | unknown [S. aureus subsp. aureus Mu50]                                                                | 4.00E-48  | 100        | 100               | BAB57055.1 |
| 49  | 6793       | 7125     | 110       |                                    | unknown [S. aureus subsp. aureus Mu50]                                                                | 1.30E-56  | 100        | 100               | BAB57056.1 |
| 47  | 7424       | 7771     | 115       |                                    | unknown [S. aureus subsp. aureus Mu50]                                                                | 5.80E-62  | 99         | 100               | BAB57058.1 |
| 41  | 7783       | 8166     | 127       |                                    | unknown [S. aureus subsp. aureus Mu50]                                                                | 6.40E-71  | 100        | 100               | BAB57059.1 |
| 25  | 8185       | 8766     | 193       | Major tail                         | Major tail protein [S. pyogenes MGAS10394]                                                            | 9.70E-20  | 35         | 82                | AAT87691.1 |
| 126 | 8324       | 8428     | 34        |                                    |                                                                                                       |           |            |                   |            |
| 44  | 8828       | 9193     | 121       |                                    | unknown [S. aureus subsp. aureus Mu50]                                                                | 2.80E-61  | 100        | 100               | BAB57061.1 |
| 48  | 9223       | 9567     | 114       |                                    | unknown [S. aureus phage phi 11]                                                                      | 6.40E-61  | 100        | 100               | AAL82269.1 |
| 1   | 9584       | 13048    | 1154      | Minor tail                         | tape measure protein [S. aureus phage phi 11]                                                         | 0         | 94         | 78                | AAL82270.1 |
| 150 | 10914      | 10795    | 39        |                                    |                                                                                                       |           |            |                   |            |
| 11  | 13061      | 14008    | 315       |                                    | ORF54 [bacteriophage phi ETA]                                                                         | 3.20E-21  | 32         | 60                | BAA97640.1 |
| 3   | 14017      | 15918    | 633       | Endopeptidase                      | Phage endopeptidase [S. pyogenes MGAS10394]                                                           | 2.20E-15  | 24         | 39                | AAT86193.1 |
| 75  | 15773      | 15940    | 55        |                                    |                                                                                                       |           |            |                   |            |
| 2   | 15933      | 17843    | 636       | Minor structural protein           | minor structural protein [S. aureus phage phiP68]                                                     | 1.90E-38  | 28         | 76                | AAO83891.1 |
| 5   | 17843      | 19666    | 607       |                                    | ORF57 [bacteriophage phi ETA]                                                                         | 0         | 89         | 100               | BAA97643.1 |
| 72  | 19140      | 19361    | 73        |                                    |                                                                                                       |           |            |                   |            |
| 40  | 19666      | 20043    | 125       |                                    | ORF58 [bacteriophage phi ETA]                                                                         | 6.10E-61  | 93         | 100               | BAA97644.1 |
| 88  | 20044      | 20226    | 60        |                                    | ORF594 [bacteriophage phi ETA]                                                                        | 3.20E-25  | 89         | 95                | BAA97645.1 |
| 54  | 20267      | 20566    | 99        |                                    | unknown [S. aureus temperate phage phiSLT]                                                            | 3.90E-48  | 93         | 100               | BAB21751.1 |
| 4   | 20703      | 22601    | 632       | Amidase                            | cell wall hydrolase [S. aureus phage phi 11]                                                          | 0         | 99         | 100               | AAL82277.1 |
| 76  | 21148      | 21258    | 36        |                                    |                                                                                                       |           |            |                   |            |
| 9   | 22614      | 23852    | 412       | Tail fiber                         | tail fiber [S. aureus subsp. aureus Mu50]                                                             | 0         | 98         | 100               | BAB57072.1 |
| 102 | 22816      | 22688    | 42        |                                    |                                                                                                       |           |            |                   |            |

Bacteriophage 85 (continued)

| ORF | Start (nt) | End (nt) | Size (aa) | Predicted Function                | Representative similarity to proteins in database                              | E-value   | % Identity | % Length of Match | Accession  |
|-----|------------|----------|-----------|-----------------------------------|--------------------------------------------------------------------------------|-----------|------------|-------------------|------------|
| 38  | 23858      | 24253    | 131       |                                   | ORF63 [bacteriophage phi ETA]                                                  | 1.40E-70  | 98         | 100               | BAA97649.1 |
| 32  | 24309      | 24746    | 145       | Holin                             | holin [S. aureus subsp. Aureus Mu50]                                           | 1.70E-75  | 97         | 100               | BAB57074.1 |
| 21  | 24727      | 25368    | 213       | Amidase                           | amidase [S. aureus subsp. Aureus Mu50]                                         | 3.00E-115 | 95         | 95                | BAB57075.1 |
| 84  | 25085      | 25264    | 59        | Amidase                           | amidase [bacteriophage 80 alpha]                                               | 4.10E-12  | 73         | 76                | AAB39699.1 |
| 27  | 25503      | 25943    | 146       | HNH endonuclease                  | putative HNH homing endonuclease [bacteriophage bIL170]                        | 1.40E-11  | 32         | 93                | AAC27227.1 |
| 18  | 26393      | 27106    | 237       | Amidase                           | amidase [S. aureus subsp. Aureus Mu50]                                         | 1.00E-142 | 100        | 100               | BAB57075.1 |
| 128 | 27652      | 27515    | 45        |                                   |                                                                                |           |            |                   |            |
| 52  | 27773      | 28084    | 103       |                                   |                                                                                |           |            |                   |            |
| 42  | 28203      | 28454    | 83        |                                   |                                                                                |           |            |                   |            |
| 7   | 29986      | 28601    | 461       | Integrase; Recombinase; Resolvase | site-specific recombinase for integration and excision [bacteriophage phi-105] | 8.20E-62  | 34         | 100               | BAA36658.1 |
| 19  | 30873      | 30193    | 226       |                                   | unknown [S. aureus subsp. Aureus Mu50]                                         | 1.10E-31  | 37         | 100               | BAB56579.1 |
| 30  | 31366      | 30905    | 153       |                                   | unknown [S. aureus subsp. Aureus MRSA252]                                      | 1.20E-80  | 96         | 99                | CAG40556.1 |
| 50  | 31714      | 31388    | 108       | Repressor                         | putative phage regulatory protein [S. aureus subsp. Aureus MSSA476]            | 2.40E-34  | 63         | 100               | CAG42672.1 |
| 79  | 31877      | 32086    | 69        | Repressor                         | putative phage regulatory protein [S. aureus subsp. Aureus MSSA476]            | 2.10E-10  | 51         | 94                | CAG42673.1 |
| 13  | 32126      | 33007    | 293       | ParB-like nuclease                | ParB-like nuclease domain protein [T. denticola ATCC 35405]                    | 6.10E-16  | 43         | 36                | AAS12707.1 |
| 16  | 33000      | 33767    | 255       |                                   | unknown [E. faecalis V583]                                                     | 1.10E-15  | 25         | 100               | AAO82012.1 |
| 51  | 33057      | 32737    | 106       |                                   |                                                                                |           |            |                   |            |
| 97  | 33838      | 34008    | 56        |                                   |                                                                                |           |            |                   |            |
| 134 | 34027      | 34158    | 43        |                                   |                                                                                |           |            |                   |            |
| 74  | 34206      | 33997    | 69        |                                   |                                                                                |           |            |                   |            |
| 92  | 34262      | 34438    | 58        |                                   | orf 10 [S. aureus prophage phiPV83]                                            | 1.30E-21  | 88         | 100               | BAA97817.1 |
| 67  | 34643      | 34413    | 76        |                                   | orf 11 [S. aureus prophage phiPV83]                                            | 1.70E-36  | 97         | 100               | BAA97818.1 |
| 125 | 34702      | 34830    | 42        |                                   |                                                                                |           |            |                   |            |
| 82  | 34823      | 34984    | 53        |                                   | putative exported protein [S. aureus subsp. Aureus MSSA476]                    | 3.80E-21  | 89         | 100               | CAG43717.1 |
| 164 | 34953      | 34843    | 36        |                                   |                                                                                |           |            |                   |            |
| 56  | 35076      | 35336    | 86        |                                   | ORF15 [bacteriophage phi ETA]                                                  | 4.30E-45  | 99         | 100               | BAA97601.1 |
| 73  | 35346      | 35567    | 73        |                                   | ORF16 [bacteriophage phi ETA]                                                  | 4.50E-37  | 100        | 100               | BAA97602.1 |
| 23  | 35560      | 36183    | 207       | Topoisomerase                     | prophage pi2 protein 11, topoisomerase [L. lactis subsp. Lactis I11403]        | 3.00E-20  | 36         | 85                | AAK05116.1 |
| 33  | 36183      | 36611    | 142       | ssDNA-binding                     | single strand DNA-binding protein [S. aureus prophage phiPV83]                 | 1.60E-76  | 98         | 100               | BAA97825.1 |
| 20  | 36625      | 37299    | 224       |                                   | unknown [S. aureus subsp. Aureus Mu50]                                         | 3.00E-129 | 98         | 100               | BAB57028.1 |
| 154 | 37296      | 37412    | 38        |                                   | 77ORF151 [Bacteriophage 77]                                                    | 6.80E-13  | 100        | 100               | AAR87940.1 |
| 17  | 38326      | 39069    | 247       | DNA replication                   | DnaA analog [Bacteriophage LL-H]                                               | 2.50E-22  | 30         | 100               | AAL77546.1 |
| 15  | 39079      | 39858    | 259       | DNA replication protein DnaC      | dnaC [S. aureus phage phi 13]                                                  | 4.00E-149 | 99         | 100               | AAL82346.1 |

## Bacteriophage 85 (continued)

| ORF | Start (nt) | End (nt) | Size (aa) | Predicted Function             | Representative similarity to proteins in database              | E-value  | % Identity | % Length of Match | Accession  |
|-----|------------|----------|-----------|--------------------------------|----------------------------------------------------------------|----------|------------|-------------------|------------|
| 108 | 39852      | 40010    | 52        |                                | unknown [S. aureus subsp. aureus Mu50]                         | 2.20E-21 | 90         | 100               | BAB57032.1 |
| 69  | 40023      | 40244    | 73        |                                | ORF24 [bacteriophage phi ETA]                                  | 5.00E-36 | 99         | 100               | BAA97610.1 |
| 37  | 40254      | 40661    | 135       | Endodeoxyribonuclease RusA     | unknown [S. aureus subsp. aureus N315]                         | 1.60E-71 | 94         | 99                | BAB43067.1 |
| 85  | 40661      | 40846    | 61        |                                | ORF26 [bacteriophage phi ETA]                                  | 5.80E-27 | 93         | 100               | BAA97612.1 |
| 45  | 40847      | 41206    | 119       | DNA-binding                    | putative DNA-binding protein [S. aureus subsp. aureus MSSA476] | 1.20E-11 | 37         | 100               | CAG42686.1 |
| 63  | 41206      | 41460    | 84        |                                | unknown [S. aureus subsp. aureus MRSA252]                      | 3.10E-43 | 99         | 100               | CAG40537.1 |
| 62  | 41466      | 41708    | 80        |                                | unknown [S. aureus subsp. aureus MRSA252]                      | 2.10E-39 | 94         | 100               | CAG41061.1 |
| 36  | 41723      | 42124    | 133       |                                | unknown [S. aureus subsp. aureus MSSA476]                      | 3.00E-57 | 82         | 100               | CAG42690.1 |
| 46  | 42121      | 42468    | 115       | Sensor                         | possible sensor protein [S. aureus phage phi 13]               | 2.80E-56 | 93         | 100               | AAL82351.1 |
| 53  | 42465      | 42773    | 102       |                                | unknown [S. aureus subsp. aureus MSSA476]                      | 3.20E-50 | 94         | 100               | CAG42692.1 |
| 65  | 42766      | 43002    | 78        |                                | unknown [S. aureus subsp. aureus MSSA476]                      | 1.30E-36 | 96         | 100               | CAG42693.1 |
| 26  | 43007      | 43549    | 180       | dUTPase                        | dUTPase [S. aureus phage phi 12]                               | 5.80E-98 | 100        | 100               | AAL82303.1 |
| 111 | 43586      | 43738    | 50        |                                | ORF35 [bacteriophage phi ETA]                                  | 2.50E-20 | 94         | 100               | BAA97621.1 |
| 34  | 43826      | 44248    | 140       | Transcriptional activator RinA | rinA [S. aureus phage phi 11]                                  | 1.20E-74 | 98         | 100               | AAL82256.1 |



Bacteriophage 2638A

| ORF | Start (nt) | End (nt) | Size (aa) | Predicted Function             | Representative similarity to proteins in database                                                        | E-value              | % Identity | % Length of Match | Accession                |
|-----|------------|----------|-----------|--------------------------------|----------------------------------------------------------------------------------------------------------|----------------------|------------|-------------------|--------------------------|
| 31  | 52         | 399      | 115       |                                | unknown [S. pyogenes SSI-1]                                                                              | 2.30E-10             | 41         | 80                | BAC64238.1               |
| 5   | 396        | 2057     | 553       | Large terminase                | phage Large terminase [S. aureus bacteriophage phi 77]                                                   | 2.00E-175            | 53         | 100               | AAM49610.1               |
| 11  | 2072       | 3229     | 385       | Portal                         | portal protein [Bacteriophage T5]                                                                        | 8.50E-06             | 22         | 97                | AAS77191.1               |
| 13  | 3144       | 4043     | 299       | Clp protease                   | putative Clp protease [S. aureus subsp. Aureus MRSA252]                                                  | 2.70E-27             | 35         | 79                | CAG41046.1               |
| 9   | 4103       | 5290     | 395       | Major capsid                   | major capsid protein a [Bacteriophage PSA]                                                               | 3.40E-50             | 34         | 90                | CAC85561.1               |
| 36  | 5308       | 5598     | 96        |                                | unknown [S. aureus subsp. Aureus MRSA252]                                                                | 1.50E-18             | 53         | 84                | CAG41043.1               |
| 27  | 5588       | 5950     | 120       |                                | unknown [S. aureus subsp. Aureus MRSA252]                                                                | 1.90E-33             | 52         | 100               | CAG41042.1               |
| 23  | 5947       | 6348     | 133       |                                | unknown [S. aureus subsp. Aureus Mu50]                                                                   | 5.90E-29             | 48         | 94                | BAB58121.1               |
| 14  | 6759       | 7664     | 301       | Major tail; beta-1,3-glucanase | putative phagelike major tail protein [B. licheniformis ATCC 14580]<br>beta-1,3-glucanase [B. circulans] | 2.10E-11<br>1.10E-10 | 27<br>39   | 67<br>29          | AAU25062.1<br>AAC60453.1 |
| 96  | 7727       | 7891     | 54        |                                |                                                                                                          |                      |            |                   |                          |
| 28  | 7906       | 8265     | 119       |                                | unknown [S. aureus subsp. Aureus MRSA252]                                                                | 1.30E-29             | 52         | 99                | CAG41037.1               |
| 94  | 8325       | 8459     | 44        |                                | unknown [S. aureus subsp. Aureus MRSA252]                                                                | 8.70E-05             | 53         | 97                | CAG41036.1               |
| 1   | 8512       | 14538    | 2008      | Tape measure protein           | tail length tape measure protein [S. aureus phage phi 13]                                                | 0                    | 31         | 84                | AAL82371.1               |
| 6   | 14535      | 16019    | 494       |                                | unknown [S. aureus subsp. Aureus MRSA252]                                                                | 3.00E-162            | 55         | 99                | CAG41034.1               |
| 2   | 16035      | 19499    | 1154      | Minor structural protein       | structural protein [S. aureus phage phi 13]                                                              | 0                    | 62         | 53                | AAL82373.1               |
| 97  | 19496      | 19660    | 54        |                                |                                                                                                          |                      |            |                   |                          |
| 38  | 19707      | 19994    | 95        |                                | orf 22 [S. aureus bacteriophage PVL]                                                                     | 8.40E-06             | 32         | 82                | BAA31895.1               |
| 35  | 20017      | 20310    | 97        |                                | unknown [S. aureus prophage phiPV83]                                                                     | 4.70E-17             | 47         | 93                | BAA97863.1               |
| 41  | 20445      | 20693    | 82        |                                |                                                                                                          |                      |            |                   |                          |
| 7   | 20695      | 22155    | 486       | Amidase                        | N-acetylmuramoyl-L-alanine amidase [Staphylococcus phage Twort]                                          | 9.30E-64             | 41         | 73                | CAA69021.1               |
| 150 | 22685      | 22566    | 39        |                                |                                                                                                          |                      |            |                   |                          |
| 58  | 22715      | 22915    | 66        |                                | unknown [S. aureus subsp. Aureus MRSA252]                                                                | 8.80E-12             | 57         | 84                | CAG40141.1               |
| 12  | 24198      | 23161    | 345       | Integrase                      | integrase [S. aureus subsp. Aureus N315]                                                                 | 1.00E-147            | 69         | 100               | BAB43090.1               |
| 15  | 24908      | 24255    | 217       | Nuclease                       | MEMBRANE NUCLEASE, LIPOPROTEIN [M. pulmonis]                                                             | 2.20E-05             | 23         | 85                | CAC13866.1               |
| 16  | 25582      | 24962    | 206       | LexA repressor                 | LexA repressor [B. cereus ATCC 14579]                                                                    | 7.40E-24             | 37         | 91                | AAP10633.1               |
| 52  | 25745      | 25987    | 80        | Transcriptional regulator      | Transcriptional regulator, Cro/CI family [S. pyogenes MGAS10394]                                         | 6.00E-10             | 46         | 86                | AAT87724.1               |
| 55  | 26007      | 26231    | 74        |                                |                                                                                                          |                      |            |                   |                          |
| 76  | 26410      | 26234    | 58        |                                |                                                                                                          |                      |            |                   |                          |
| 33  | 26477      | 26800    | 107       |                                | unknown [S. aureus subsp. Aureus MSSA476]                                                                | 4.90E-32             | 59         | 97                | CAG43718.1               |
| 30  | 27055      | 27411    | 118       | ATPase                         | ATPase involved in DNA repair [T. tengcongensis MB4]                                                     | 6.40E-05             | 30         | 99                | AAM23562.1               |
| 10  | 27408      | 28574    | 388       |                                | unknown [S. aureus subsp. Aureus MRSA252]                                                                | 7.00E-178            | 77         | 100               | CAG40542.1               |

Bacteriophage 2638A (continued)

| ORF | Start (nt) | End (nt) | Size (aa) | Predicted Function                         | Representative similarity to proteins in database                                                                | E-value        | % Identity | % Length of Match | Accession                |
|-----|------------|----------|-----------|--------------------------------------------|------------------------------------------------------------------------------------------------------------------|----------------|------------|-------------------|--------------------------|
| 18  | 28603      | 29157    | 184       |                                            | unknown [S. aureus phage phi 12]                                                                                 | 2.70E-82       | 81         | 100               | AAL82292.1               |
| 4   | 29215      | 31176    | 653       | DNA-directed DNA polymerase                | putative DNA polymerase [S. aureus subsp. aureus MSSA476]                                                        | 0              | 88         | 100               | CAG42684.1               |
| 59  | 31188      | 31391    | 67        |                                            |                                                                                                                  |                |            |                   |                          |
| 85  | 31384      | 31557    | 57        |                                            |                                                                                                                  |                |            |                   |                          |
| 48  | 32010      | 32261    | 83        |                                            | unknown [S. aureus subsp. aureus MRSA252]                                                                        | 5.30E-19       | 52         | 97                | CAG40535.1               |
| 74  | 32265      | 32450    | 61        |                                            |                                                                                                                  |                |            |                   |                          |
| 29  | 32447      | 32797    | 116       | Sensor                                     | possible sensor protein [S. aureus phage phi 13]                                                                 | 1.40E-20       | 41         | 100               | AAL82351.1               |
| 21  | 32794      | 33177    | 127       |                                            |                                                                                                                  |                |            |                   |                          |
| 80  | 33178      | 33357    | 59        |                                            |                                                                                                                  |                |            |                   |                          |
| 82  | 33358      | 33534    | 58        |                                            |                                                                                                                  |                |            |                   |                          |
| 44  | 33524      | 33790    | 88        |                                            | unknown [E. faecalis V583]                                                                                       | 1.00E-06       | 40         | 68                | AAO81853.1               |
| 101 | 33792      | 33947    | 51        |                                            |                                                                                                                  |                |            |                   |                          |
| 19  | 33940      | 34479    | 179       | dUTPase                                    | putative dUTP pyrophosphatase [S. aureus subsp. aureus MRSA252]                                                  | 2.00E-58       | 65         | 100               | CAG41057.1               |
| 51  | 34516      | 34758    | 80        |                                            |                                                                                                                  |                |            |                   |                          |
| 63  | 34755      | 34949    | 64        |                                            | unknown [S. aureus subsp. aureus MRSA252]                                                                        | 3.20E-09       | 68         | 68                | CAG41056.1               |
| 40  | 34940      | 35221    | 93        |                                            | unknown [C. perfringens str. 13]                                                                                 | 5.10E-11       | 53         | 59                | BAB80820.1               |
| 113 | 35218      | 35361    | 47        |                                            |                                                                                                                  |                |            |                   |                          |
| 54  | 35361      | 35588    | 75        |                                            |                                                                                                                  |                |            |                   |                          |
| 83  | 35588      | 35764    | 58        |                                            |                                                                                                                  |                |            |                   |                          |
| 3   | 35801      | 38251    | 816       | Virulence-associated; DNA primase/helicase | virulence-associated protein E [B. cereus ATCC 10987]<br>putative DNA primase/helicase [S. pyogenes phage 315.6] | 0<br>1.60E-93  | 43<br>41   | 98<br>56          | AAS39320.1<br>AAM80049.1 |
| 152 | 38536      | 38652    | 38        |                                            |                                                                                                                  |                |            |                   |                          |
| 37  | 38609      | 38905    | 98        |                                            | unknown [S. aureus subsp. aureus MSSA476]                                                                        | 1.40E-34       | 67         | 97                | CAG42703.1               |
| 8   | 38889      | 40247    | 452       | SNF helicase; DEAD/DEAH box helicase       | phage helicase [S. aureus phage phi 12]<br>SNF2 domain protein [E. faecalis V583]                                | 0<br>4.00E-140 | 82<br>55   | 93<br>99          | AAL82307.1<br>AAO80193.1 |
| 20  | 40261      | 40746    | 161       |                                            | orf 61 [S. aureus bacteriophage PVL]                                                                             | 2.70E-23       | 41         | 82                | BAA31934.1               |
| 26  | 40893      | 41216    | 107       | HNH endonuclease                           | prophage LambdaBa02, HNH endonuclease family protein [B. anthracis str. 'Ames Ancestor']                         | 3.30E-12       | 40         | 94                | AAT33216.1               |

## Bacteriophage 77

| ORF | Start (nt) | End (nt) | Size (aa) | Predicted Function         | Representative similarity to proteins in database                   | E-value   | % Identity | % Length of Match | Accession  |
|-----|------------|----------|-----------|----------------------------|---------------------------------------------------------------------|-----------|------------|-------------------|------------|
| 37  | 102        | 446      | 114       |                            | unknown [S. aureus subsp. aureus MRSA252]                           | 1.20E-59  | 100        | 100               | CAG41049.1 |
| 3   | 443        | 2104     | 553       | Large terminase            | phage large terminase [S. aureus bacteriophage phi 77]              | 0         | 100        | 100               | AAM49610.1 |
| 8   | 2120       | 3307     | 395       | Portal                     | putative portal protein [Bacteriophage T5]                          | 6.80E-06  | 22         | 97                | AAU05287.1 |
| 15  | 3291       | 4028     | 245       | Clp protease               | putative Clp protease [S. aureus subsp. aureus MRSA252]             | 1.00E-131 | 98         | 100               | CAG41046.1 |
| 6   | 4051       | 5196     | 381       | Major capsid               | major capsid protein a [Bacteriophage PSA]                          | 7.80E-36  | 30         | 100               | CAC85561.1 |
| 45  | 5216       | 5500     | 94        |                            | unknown [S. aureus subsp. aureus MRSA252]                           | 8.90E-48  | 98         | 100               | CAG41044.1 |
| 33  | 5758       | 6120     | 120       | Head-tail adaptor          | unknown [S. aureus subsp. aureus MRSA252]                           | 9.90E-67  | 100        | 100               | CAG41042.1 |
| 29  | 6117       | 6521     | 134       |                            | unknown [S. aureus subsp. aureus N315]                              | 7.10E-59  | 81         | 100               | BAB43047.1 |
| 27  | 6518       | 6925     | 135       |                            | unknown [S. aureus subsp. aureus MRSA252]                           | 9.20E-75  | 99         | 100               | CAG41040.1 |
| 20  | 6926       | 7570     | 214       | Major tail                 | putative phagelike major tail protein [B. licheniformis ATCC 14580] | 2.00E-06  | 29         | 75                | AAU25062.1 |
| 34  | 7886       | 8236     | 116       |                            | unknown [S. aureus subsp. aureus MRSA252]                           | 6.30E-61  | 100        | 100               | CAG41037.1 |
| 100 | 8263       | 8424     | 53        |                            | unknown [S. aureus subsp. aureus MRSA252]                           | 1.10E-23  | 100        | 100               | CAG41036.1 |
| 1   | 8481       | 13010    | 1509      | Tape measure protein       | tail length tape measure protein [S. aureus phage phi 13]           | 0         | 51         | 100               | AAL82371.1 |
| 4   | 13007      | 14491    | 494       |                            | unknown [S. aureus subsp. aureus N315]                              | 0         | 100        | 100               | BAB43042.1 |
| 2   | 14507      | 18292    | 1261      | Minor structural protein   | structural protein [S. aureus phage phi 13]                         | 0         | 99         | 97                | AAL82373.1 |
| 109 | 18282      | 18434    | 50        |                            | orf 55 [S. aureus prophage phiPV83]                                 | 1.50E-22  | 100        | 100               | BAA97861.1 |
| 44  | 18481      | 18768    | 95        |                            | orf 22 [S. aureus bacteriophage PVL]                                | 8.60E-43  | 92         | 100               | BAA31895.1 |
| 58  | 18892      | 19122    | 76        |                            | unknown [S. aureus temperate phage phiSLT]                          | 2.20E-15  | 46         | 100               | BAB21751.1 |
| 35  | 19258      | 19560    | 100       | Holin                      | holin [S. aureus bacteriophage PVL]                                 | 1.70E-51  | 100        | 100               | BAA31897.1 |
| 5   | 19572      | 21026    | 484       | Amidase                    | amidase [S. aureus subsp. aureus MRSA252]                           | 0         | 100        | 100               | CAG40495.1 |
| 7   | 23076      | 21871    | 401       | Integrase                  | phage integrase [S. aureus subsp. aureus MSSA476]                   | 0         | 85         | 100               | CAG42666.1 |
| 17  | 23982      | 23269    | 237       |                            | unknown [S. aureus subsp. aureus MRSA252]                           | 4.60E-18  | 29         | 100               | CAG39388.1 |
| 85  | 24242      | 24060    | 60        |                            | unknown [S. aureus phage phi 12]                                    | 3.10E-28  | 100        | 100               | AAL82284.1 |
| 11  | 25208      | 24441    | 255       | Repressor                  | ci-like repressor [S. aureus phage phi 13]                          | 4.00E-128 | 90         | 99                | AAL82333.1 |
| 77  | 25357      | 25605    | 82        | Repressor                  | repressor-like protein [S. aureus phage phi 13]                     | 5.40E-19  | 61         | 86                | AAL82334.1 |
| 46  | 25663      | 25935    | 90        |                            | 77ORF046 [Bacteriophage 77]                                         | 1.10E-45  | 100        | 100               | AAR87914.1 |
| 10  | 26092      | 26889    | 265       | Antirepressor; DNA-binding | antirepressor [S. aureus prophage phiPV83]                          | 1.00E-145 | 98         | 100               | BAA97816.1 |
| 23  | 26903      | 27346    | 147       |                            | orf 7 [S. aureus prophage phiPV83]                                  | 1.60E-76  | 97         | 100               | BAA97814.1 |
| 117 | 27361      | 27501    | 46        |                            | orf 8 [S. aureus prophage phiPV83]                                  | 1.00E-18  | 100        | 100               | BAA97815.1 |
| 66  | 27703      | 27494    | 69        |                            | 77ORF066 [Bacteriophage 77]                                         | 2.60E-32  | 100        | 100               | AAR87924.1 |
| 14  | 27760      | 28512    | 250       | Antirepressor              | putative anti repressor [S. aureus subsp. aureus MRSA252]           | 4.00E-122 | 90         | 100               | CAG41079.1 |
| 65  | 28528      | 28746    | 72        |                            | orf 10 [S. aureus prophage phiPV83]                                 | 4.10E-06  | 86         | 38                | BAA97817.1 |

Bacteriophage 77 (continued)

| ORF | Start (nt) | End (nt) | Size (aa) | Predicted Function             | Representative similarity to proteins in database              | E-value   | % Identity | % Length of Match | Accession  |
|-----|------------|----------|-----------|--------------------------------|----------------------------------------------------------------|-----------|------------|-------------------|------------|
| 48  | 28776      | 29039    | 87        | DNA-binding                    | putative DNA-binding protein [S. aureus subsp. aureus MSSA476] | 1.20E-47  | 100        | 100               | CAG42677.1 |
| 102 | 29051      | 29212    | 53        |                                | putative exported protein [S. aureus subsp. aureus MSSA476]    | 1.70E-21  | 91         | 100               | CAG43717.1 |
| 43  | 29304      | 29564    | 86        |                                | orf 39 [S. aureus bacteriophage PVL]                           | 2.50E-45  | 100        | 100               | BAA31913.1 |
| 64  | 29574      | 29795    | 73        |                                | unknown [S. aureus subsp. aureus Mu50]                         | 5.90E-37  | 100        | 100               | BAB57024.1 |
| 12  | 29788      | 30576    | 262       |                                | ORF17 [bacteriophage phi ETA]                                  | 1.70E-99  | 67         | 98                | BAA97603.1 |
| 22  | 30605      | 31156    | 183       | ssDNA-binding                  | ssb [S. aureus phage phi 11]                                   | 1.50E-61  | 63         | 100               | AAL82241.1 |
| 18  | 31169      | 31840    | 223       |                                | ORF20 [bacteriophage phi ETA]                                  | 3.00E-128 | 99         | 100               | BAA97606.1 |
| 151 | 31837      | 31953    | 38        |                                | 77ORF151 [Bacteriophage 77]                                    | 6.80E-13  | 100        | 100               | AAR87940.1 |
| 9   | 32803      | 31946    | 285       |                                | unknown phage protein [S. pyogenes MGAS10394]                  | 4.20E-22  | 36         | 58                | AAT86873.1 |
| 16  | 32867      | 33610    | 247       | DNA replication                | DnaA analog [Bacteriophage LL-H]                               | 1.10E-22  | 30         | 100               | AAL77546.1 |
| 13  | 33620      | 34399    | 259       | DNA replication protein DnaC   | dnaC [S. aureus phage phi 13]                                  | 5.00E-149 | 99         | 100               | AAL82346.1 |
| 104 | 34393      | 34551    | 52        |                                | unknown [S. aureus subsp. aureus Mu50]                         | 2.20E-21  | 90         | 100               | BAB57032.1 |
| 59  | 34564      | 34785    | 73        |                                | ORF24 [bacteriophage phi ETA]                                  | 1.30E-36  | 100        | 100               | BAA97610.1 |
| 28  | 34795      | 35199    | 134       |                                | orf 22 [S. aureus prophage phiPV83]                            | 4.60E-74  | 99         | 100               | BAA97829.1 |
| 80  | 35204      | 35389    | 61        |                                | ORF26 [bacteriophage phi ETA]                                  | 1.50E-27  | 95         | 100               | BAA97612.1 |
| 178 | 35390      | 35491    | 33        |                                | 77ORF178 [Bacteriophage 77]                                    | 4.30E-15  | 100        | 100               | AAR87941.1 |
| 41  | 35454      | 35753    | 99        | DNA-binding                    | putative DNA-binding protein [S. aureus subsp. aureus MSSA476] | 9.10E-13  | 55         | 71                | CAG42686.1 |
| 50  | 35753      | 36007    | 84        |                                | unknown [S. aureus subsp. aureus MRSA252]                      | 5.30E-43  | 99         | 100               | CAG40537.1 |
| 49  | 36013      | 36255    | 80        |                                | unknown [S. aureus subsp. aureus MSSA476]                      | 1.60E-39  | 94         | 100               | CAG42688.1 |
| 70  | 36269      | 36475    | 68        |                                | unknown [S. aureus subsp. aureus MSSA476]                      | 5.60E-35  | 100        | 100               | CAG42689.1 |
| 30  | 36478      | 36879    | 133       |                                | unknown [S. aureus subsp. aureus MSSA476]                      | 4.60E-58  | 83         | 100               | CAG42690.1 |
| 36  | 36876      | 37223    | 115       | Sensor                         | possible sensor protein [S. aureus phage phi 13]               | 2.80E-56  | 93         | 100               | AAL82351.1 |
| 39  | 37220      | 37528    | 102       |                                | unknown [S. aureus subsp. aureus MSSA476]                      | 2.00E-52  | 96         | 100               | CAG42692.1 |
| 53  | 37521      | 37757    | 78        |                                | unknown [S. aureus subsp. aureus MSSA476]                      | 1.30E-36  | 96         | 100               | CAG42693.1 |
| 21  | 37762      | 38304    | 180       | dUTPase                        | dUTPase [S. aureus phage phi 12]                               | 5.80E-98  | 100        | 100               | AAL82303.1 |
| 69  | 38341      | 38547    | 68        |                                | unknown [S. aureus subsp. aureus Mu50]                         | 1.60E-29  | 87         | 100               | BAB57039.1 |
| 74  | 38544      | 38738    | 64        |                                | unknown [S. aureus subsp. aureus Mu50]                         | 6.10E-29  | 97         | 100               | BAB57040.1 |
| 72  | 38735      | 38938    | 67        |                                | unknown [S. aureus subsp. aureus Mu50]                         | 1.50E-32  | 100        | 100               | BAB57041.1 |
| 51  | 38931      | 39167    | 78        |                                | unknown [S. aureus subsp. aureus Mu50]                         | 5.80E-37  | 94         | 100               | BAB57042.1 |
| 31  | 39160      | 39546    | 128       |                                | ORF36 [bacteriophage phi ETA]                                  | 2.40E-62  | 92         | 100               | BAA97622.1 |
| 112 | 39543      | 39692    | 49        | Transcriptional activator RinB | rinB [S. aureus phage phi 11]                                  | 8.20E-16  | 75         | 100               | AAL82255.1 |
| 108 | 39692      | 39844    | 50        |                                | orf 58 [S. aureus bacteriophage PVL]                           | 1.10E-20  | 100        | 100               | BAA31931.1 |
| 19  | 39851      | 40501    | 216       |                                | orf 59 [S. aureus bacteriophage PVL]                           | 7.00E-121 | 100        | 100               | BAA31932.1 |

Bacteriophage 77 (continued)

| ORF | Start (nt) | End (nt) | Size (aa) | Predicted Function                     | Representative similarity to proteins in database                                                                                                       | E-value              | % Identity | % Length of Match | Accession                |
|-----|------------|----------|-----------|----------------------------------------|---------------------------------------------------------------------------------------------------------------------------------------------------------|----------------------|------------|-------------------|--------------------------|
| 71  | 40498      | 40701    | 67        |                                        | putative exported protein [S. aureus subsp. aureus MRSA252]                                                                                             | 2.20E-31             | 99         | 100               | CAG41053.1               |
| 26  | 40729      | 41145    | 138       | Transcriptional activator RinA         | unknown [S. aureus subsp. aureus MRSA252]                                                                                                               | 1.50E-77             | 99         | 100               | CAG41052.1               |
| 40  | 41377      | 41676    | 99        | HNH endonuclease; Electron transporter | putative electron transporter [B. licheniformis ATCC 14580]<br>prophage LambdaBa02, HNH endonuclease family protein [B. anthracis str. 'Ames Ancestor'] | 6.10E-09<br>6.10E-09 | 42<br>39   | 73<br>92          | AAU25074.1<br>AAT33216.1 |

Bacteriophage 42e

| ORF | Start (nt) | End (nt) | Size (aa) | Predicted Function       | Representative similarity to proteins in database                                       | E-value   | % Identity | % Length of Match | Accession  |
|-----|------------|----------|-----------|--------------------------|-----------------------------------------------------------------------------------------|-----------|------------|-------------------|------------|
| 43  | 47         | 352      | 101       | Small terminase          | terminase-small subunit [S. aureus phage phi 12]                                        | 5.80E-52  | 100        | 100               | AAL82310.1 |
| 3   | 342        | 2033     | 563       | Large terminase          | large terminase [S. aureus subsp. aureus MW2]                                           | 0         | 100        | 100               | BAB95266.1 |
| 8   | 2047       | 3276     | 409       | Portal                   | portal protein [S. aureus subsp. aureus MW2]                                            | 0         | 100        | 100               | BAB95265.1 |
| 15  | 3260       | 4033     | 257       | Clp protease             | scaffolding protease [S. aureus phage phi 12]                                           | 1.00E-142 | 100        | 100               | AAL82313.1 |
| 9   | 4045       | 5208     | 387       | Major capsid             | prophage LambdaBa02, major capsid protein, putative [B. anthracis str. 'Ames Ancestor'] | 5.10E-99  | 51         | 97                | AAT33211.1 |
| 172 | 5156       | 5266     | 36        |                          |                                                                                         |           |            |                   |            |
| 55  | 5277       | 5555     | 92        | DNA packaging            | unknown [S. aureus temperate phage phiSLT]                                              | 9.00E-48  | 100        | 100               | BAB21736.1 |
| 110 | 5395       | 5532     | 45        |                          |                                                                                         |           |            |                   |            |
| 42  | 5567       | 5899     | 110       |                          | unknown [S. aureus subsp. aureus MSSA476]                                               | 4.70E-59  | 100        | 100               | CAG42713.1 |
| 34  | 5896       | 6297     | 133       |                          | unknown [S. aureus subsp. aureus MW2]                                                   | 1.80E-70  | 100        | 100               | BAB95260.1 |
| 35  | 6298       | 6693     | 131       |                          | unknown [S. aureus temperate phage phiSLT]                                              | 9.10E-70  | 100        | 100               | BAB21739.1 |
| 21  | 6728       | 7369     | 213       | Major tail               | major tail protein [S. aureus phage phi 12]                                             | 8.00E-122 | 100        | 100               | AAL82318.1 |
| 83  | 7227       | 7427     | 66        |                          |                                                                                         |           |            |                   |            |
| 28  | 7461       | 7916     | 151       | Major tail               | major tail protein [S. aureus phage phi 12]                                             | 1.80E-81  | 100        | 100               | AAL82319.1 |
| 41  | 7974       | 8324     | 116       |                          | unknown [S. aureus temperate phage phiSLT]                                              | 2.80E-61  | 100        | 100               | BAB21742.1 |
| 103 | 8366       | 8524     | 52        |                          | unknown [S. aureus bacteriophage phi 3A]                                                | 3.10E-23  | 100        | 100               | AAM49604.1 |
| 1   | 8538       | 14738    | 2066      | Tail fiber               | tail fiber protein [S. aureus phage phi 12]                                             | 0         | 100        | 100               | AAL82321.1 |
| 25  | 12928      | 12422    | 168       |                          |                                                                                         |           |            |                   |            |
| 106 | 13576      | 13719    | 47        |                          |                                                                                         |           |            |                   |            |
| 14  | 14738      | 15562    | 274       | Holin                    | holin-like protein [S. aureus phage phi 12]                                             | 7.00E-160 | 100        | 100               | AAL82322.1 |
| 4   | 15571      | 17154    | 527       | Minor structural protein | minor structural protein, putative [Listeria monocytogenes str. 4b F2365]               | 1.20E-32  | 36         | 43                | AAT02929.1 |
| 52  | 17154      | 17444    | 96        |                          | unknown [S. aureus subsp. aureus MSSA476]                                               | 2.50E-50  | 100        | 100               | CAG42723.1 |
| 2   | 17460      | 19370    | 636       | Minor structural protein | minor structural protein [S. aureus phage phiP68]                                       | 1.20E-37  | 27         | 85                | AAO83891.1 |
| 5   | 19370      | 20836    | 488       |                          | unknown [S. aureus subsp. aureus MW2]                                                   | 0         | 99         | 100               | BAB95250.1 |
| 36  | 20836      | 21225    | 129       |                          | unknown [S. aureus subsp. aureus MSSA476]                                               | 3.50E-61  | 91         | 100               | CAG42726.1 |
| 97  | 21218      | 21382    | 54        |                          | unknown [S. aureus subsp. aureus MSSA476]                                               | 5.60E-25  | 96         | 100               | CAG42727.1 |
| 47  | 21428      | 21727    | 99        |                          | unknown [S. aureus temperate phage phiSLT]                                              | 1.40E-50  | 96         | 100               | BAB21751.1 |
| 87  | 21922      | 22056    | 44        |                          | putative membrane protein [S. aureus subsp. aureus MSSA476]                             | 2.40E-15  | 98         | 100               | CAG43677.1 |
| 61  | 22258      | 22512    | 84        | Holin                    | holin [S. aureus phage phi 13]                                                          | 2.90E-41  | 95         | 100               | AAL82376.1 |
| 17  | 22524      | 23279    | 251       | Amidase                  | amidase [S. aureus phage phi 13]                                                        | 7.00E-150 | 97         | 100               | AAL82377.1 |

## Bacteriophage 42e (continued)

| ORF | Start (nt) | End (nt) | Size (aa) | Predicted Function               | Representative similarity to proteins in database                       | E-value   | % Identity | % Length of Match | Accession  |
|-----|------------|----------|-----------|----------------------------------|-------------------------------------------------------------------------|-----------|------------|-------------------|------------|
| 10  | 23467      | 24561    | 364       | Staphylokinase                   | streptokinase precursor [Streptococcus dysgalactiae subsp. Equisimilis] | 5.80E-25  | 25         | 100               | AAC83933.1 |
| 161 | 24868      | 24767    | 33        |                                  |                                                                         |           |            |                   |            |
| 48  | 24989      | 25300    | 103       |                                  |                                                                         |           |            |                   |            |
| 37  | 25287      | 25670    | 127       |                                  |                                                                         |           |            |                   |            |
| 12  | 26860      | 25883    | 325       | IMP dehydrogenase/GMP reductase  | putative GMP reductase [S. aureus subsp. Aureus MSSA476]                | 0         | 100        | 100               | CAG43055.1 |
| 11  | 28235      | 27198    | 345       | Integrase                        | integrase [S. aureus subsp. Aureus N315]                                | 0         | 94         | 100               | BAB43090.1 |
| 26  | 28799      | 28302    | 165       |                                  | ORF2 [bacteriophage phi ETA]                                            | 3.80E-23  | 61         | 50                | BAA97588.1 |
| 31  | 29214      | 28789    | 141       |                                  | ORF3 [bacteriophage phi ETA]                                            | 1.20E-74  | 97         | 100               | BAA97589.1 |
| 22  | 29883      | 29299    | 194       |                                  | putative lipoprotein [S. aureus subsp. Aureus MRSA252]                  | 2.80E-11  | 44         | 41                | CAG40557.1 |
| 18  | 30658      | 29939    | 239       | Repressor                        | cl-like repressor [S. aureus phage phi 11]                              | 3.00E-134 | 100        | 100               | AAL82233.1 |
| 76  | 30800      | 31018    | 72        | DNA-binding; Repressor           | cro-like repressor [S. aureus phage phi 11]                             | 2.30E-36  | 100        | 100               | AAL82234.1 |
| 49  | 31033      | 31341    | 102       | BAG domain                       | 77ORF046 [Bacteriophage 77]                                             | 4.10E-42  | 92         | 88                | AAR87914.1 |
| 13  | 31498      | 32289    | 263       | Antirepressor                    | anti-repressor [S. aureus phage phi 11]                                 | 2.00E-147 | 100        | 100               | AAL82235.1 |
| 71  | 32290      | 32514    | 74        |                                  | unknown [S. aureus phage phi 11]                                        | 2.00E-37  | 100        | 100               | AAL82236.1 |
| 29  | 32556      | 33005    | 149       |                                  | unknown [S. aureus phage phi 11]                                        | 1.00E-81  | 100        | 100               | AAL82237.1 |
| 72  | 33019      | 33240    | 73        |                                  | unknown [S. aureus subsp. Aureus Mu50]                                  | 1.40E-33  | 99         | 100               | BAB57021.1 |
| 98  | 33233      | 33394    | 53        |                                  | putative exported protein [S. aureus subsp. Aureus MSSA476]             | 3.60E-24  | 100        | 100               | CAG43717.1 |
| 175 | 33363      | 33253    | 36        |                                  |                                                                         |           |            |                   |            |
| 59  | 33496      | 33756    | 86        |                                  | ORF15 [bacteriophage phi ETA]                                           | 1.20E-44  | 98         | 100               | BAA97601.1 |
| 27  | 33770      | 34249    | 159       |                                  | orf 16 [S. aureus prophage phiPV83]                                     | 6.00E-84  | 98         | 100               | BAA97823.1 |
| 20  | 34249      | 34887    | 212       | ssDNA-binding; Recombination     | recombination protein [temperate phage PhiNIH1.1]                       | 2.70E-40  | 50         | 86                | AAL15054.1 |
| 32  | 34887      | 35312    | 141       | ssDNA-binding                    | single strand DNA-binding protein [S. aureus prophage phiPV83]          | 5.90E-71  | 94         | 100               | BAA97825.1 |
| 19  | 35326      | 36000    | 224       |                                  | unknown [S. aureus subsp. Aureus Mu50]                                  | 1.00E-128 | 98         | 100               | BAB57028.1 |
| 16  | 35993      | 36748    | 251       | DnaD and phage-associated domain | unknown [B. cereus ZK]                                                  | 4.20E-36  | 51         | 62                | AAU16814.1 |
| 40  | 36748      | 37104    | 118       |                                  |                                                                         |           |            |                   |            |
| 7   | 37101      | 38342    | 413       | DnaB-like helicase               | helicase DnaB [S. aureus phage phi 11]                                  | 0         | 100        | 100               | AAL82244.1 |
| 78  | 38339      | 38554    | 71        |                                  |                                                                         |           |            |                   |            |
| 73  | 38558      | 38779    | 73        |                                  | ORF24 [bacteriophage phi ETA]                                           | 1.30E-36  | 100        | 100               | BAA97610.1 |
| 33  | 38790      | 39194    | 134       |                                  | ORF25 [bacteriophage phi ETA]                                           | 7.10E-75  | 99         | 100               | BAA97611.1 |
| 88  | 39199      | 39384    | 61        |                                  | orf 23 [S. aureus prophage phiPV83]                                     | 1.10E-25  | 92         | 100               | BAA97830.1 |
| 58  | 39385      | 39654    | 89        | Repressor                        | HTH DNA-binding protein [S. aureus phage phi 11]                        | 5.50E-45  | 100        | 100               | AAL82248.1 |
| 64  | 40015      | 40263    | 82        |                                  | orf 51 [S. aureus bacteriophage PVL]                                    | 6.10E-39  | 94         | 96                | BAA31924.1 |
| 60  | 40275      | 40526    | 83        |                                  | orf 52 [S. aureus bacteriophage PVL]                                    | 4.20E-40  | 100        | 98                | BAA31925.1 |

Bacteriophage 42e (continued)

| ORF | Start (nt) | End (nt) | Size (aa) | Predicted Function                           | Representative similarity to proteins in database                                                                                                       | E-value              | % Identity | % Length of Match | Accession                |
|-----|------------|----------|-----------|----------------------------------------------|---------------------------------------------------------------------------------------------------------------------------------------------------------|----------------------|------------|-------------------|--------------------------|
| 24  | 40501      | 41028    | 175       | dUTPase                                      | dUTPase [S. aureus bacteriophage PVL]                                                                                                                   | 3.30E-95             | 100        | 100               | BAA31926.1               |
| 81  | 41065      | 41271    | 68        |                                              | unknown [S. aureus subsp. aureus MRSA252]                                                                                                               | 4.90E-31             | 96         | 100               | CAG41056.1               |
| 38  | 41268      | 41624    | 118       |                                              | orf31 [S. aureus prophage phiPV83]                                                                                                                      | 2.10E-48             | 77         | 100               | BAA97838.1               |
| 112 | 41621      | 41773    | 50        | Transcriptional activator RinB               | transcriptional activator rinB [S. aureus phage phi 12]                                                                                                 | 1.90E-20             | 92         | 100               | AAL82304.1               |
| 69  | 41841      | 42041    | 66        |                                              | putative exported phage protein [S. aureus subsp. aureus MRSA252]                                                                                       | 4.20E-30             | 100        | 100               | CAG40524.1               |
| 198 | 41899      | 41798    | 33        |                                              |                                                                                                                                                         |                      |            |                   |                          |
| 23  | 42093      | 42656    | 187       | Virulence associated E; DNA primase/helicase | virulence-associated protein E [B. cereus ATCC 10987]<br>putative DNA primase/helicase - phage associated [S. pyogenes phage 315.6]                     | 9.90E-43<br>2.40E-33 | 52<br>42   | 78<br>82          | AAS39320.1<br>AAM80049.1 |
| 62  | 42635      | 42889    | 84        | Virulence associated E                       | virulence-associated protein E [B. cereus ATCC 10987]                                                                                                   | 1.80E-06             | 40         | 85                | AAS39320.1               |
| 147 | 43035      | 42913    | 40        |                                              | unknown [S. aureus subsp. aureus MW2]                                                                                                                   | 3.80E-16             | 93         | 100               | BAB95272.1               |
| 191 | 43096      | 42992    | 34        |                                              |                                                                                                                                                         |                      |            |                   |                          |
| 53  | 43230      | 43520    | 96        |                                              | unknown [S. aureus subsp. aureus MSSA476]                                                                                                               | 7.70E-52             | 99         | 100               | CAG42703.1               |
| 6   | 43501      | 44868    | 455       | DEAD/DEAH box helicase                       | phage helicase [S. aureus phage phi 12]                                                                                                                 | 0                    | 97         | 92                | AAL82307.1               |
| 155 | 44657      | 44761    | 34        |                                              |                                                                                                                                                         |                      |            |                   |                          |
| 30  | 44881      | 45318    | 145       | Transcriptional activator RinA               | phage regulatory protein [S. aureus subsp. aureus MRSA252]                                                                                              | 4.20E-77             | 97         | 100               | CAG40520.1               |
| 46  | 45475      | 45789    | 104       | HNH endonuclease; Electron transporter       | putative electron transporter [B. licheniformis ATCC 14580]<br>prophage LambdaBa02, HNH endonuclease family protein [B. anthracis str. 'Ames Ancestor'] | 8.30E-19<br>1.60E-14 | 52<br>46   | 89<br>85          | AAU25074.1<br>AAT33216.1 |



## Bacteriophage 3A

| ORF | Start (nt) | End (nt) | Size (aa) | Predicted Function                    | Representative similarity to proteins in database                                       | E-value   | % Identity | % Length of Match | Accession  |
|-----|------------|----------|-----------|---------------------------------------|-----------------------------------------------------------------------------------------|-----------|------------|-------------------|------------|
| 37  | 117        | 422      | 101       | Small terminase                       | small terminase [S. aureus subsp. aureus MRSA252]                                       | 5.80E-52  | 100        | 100               | CAG40518.1 |
| 5   | 412        | 2103     | 563       | Large terminase; Homing endonucleases | large terminase [S. aureus subsp. aureus MSSA476]                                       | 0         | 100        | 100               | CAG42708.1 |
| 10  | 2117       | 3346     | 409       | Portal                                | portal protein [S. aureus temperate phage phiSLT]                                       | 0         | 100        | 100               | BAB21733.1 |
| 15  | 3330       | 4103     | 257       | Clp protease                          | scaffolding protease [S. aureus phage phi 12]                                           | 6.00E-141 | 99         | 100               | AAL82313.1 |
| 11  | 4115       | 5278     | 387       | Major capsid                          | prophage LambdaBa02, major capsid protein, putative [B. anthracis str. 'Ames Ancestor'] | 3.30E-98  | 51         | 97                | AAT33211.1 |
| 46  | 5347       | 5625     | 92        | DNA packaging                         | unknown [S. aureus temperate phage phiSLT]                                              | 2.00E-47  | 99         | 100               | BAB21736.1 |
| 97  | 5465       | 5602     | 45        |                                       |                                                                                         |           |            |                   |            |
| 36  | 5637       | 5969     | 110       |                                       | unknown [S. aureus temperate phage phiSLT]                                              | 1.60E-59  | 100        | 100               | BAB21737.1 |
| 28  | 5966       | 6367     | 133       |                                       | unknown [S. aureus subsp. aureus MW2]                                                   | 9.90E-69  | 97         | 100               | BAB95260.1 |
| 29  | 6368       | 6763     | 131       |                                       | unknown [S. aureus temperate phage phiSLT]                                              | 1.40E-67  | 97         | 100               | BAB21739.1 |
| 17  | 6798       | 7439     | 213       | Major tail                            | major tail protein [S. aureus phage phi 12]                                             | 1.00E-119 | 98         | 100               | AAL82318.1 |
| 23  | 7531       | 7986     | 151       | Major tail                            | major tail protein [S. aureus temperate phage phiSLT]                                   | 1.80E-81  | 100        | 100               | BAB21741.1 |
| 34  | 8044       | 8394     | 116       |                                       | unknown [S. aureus temperate phage phiSLT]                                              | 2.40E-60  | 98         | 100               | BAB21742.1 |
| 1   | 8608       | 13557    | 1649      | Tape measure protein                  | tail fiber protein [S. aureus phage phi 12]                                             | 0         | 99         | 99                | AAL82321.1 |
| 22  | 12998      | 12492    | 168       |                                       |                                                                                         |           |            |                   |            |
| 13  | 13581      | 14807    | 408       | Tail fiber                            | tail fiber protein [S. aureus phage phi 12]                                             | 0         | 98         | 100               | AAL82321.1 |
| 14  | 14807      | 15631    | 274       | Holin                                 | holin-like protein [S. aureus phage phi 12]                                             | 9.00E-160 | 100        | 100               | AAL82322.1 |
| 6   | 15640      | 17223    | 527       | Minor structural protein              | minor structural protein, putative [Listeria monocytogenes str. 4b F2365]               | 4.20E-33  | 36         | 45                | AAT02929.1 |
| 44  | 17223      | 17513    | 96        |                                       | unknown [S. aureus subsp. aureus MSSA476]                                               | 2.50E-50  | 100        | 100               | CAG42723.1 |
| 4   | 17529      | 19439    | 636       | Minor structural protein              | minor structural protein [S. aureus phage phiP68]                                       | 7.20E-38  | 27         | 87                | AAO83891.1 |
| 7   | 19439      | 20905    | 488       |                                       | unknown [S. aureus subsp. aureus MW2]                                                   | 0         | 100        | 100               | BAB95250.1 |
| 30  | 20905      | 21294    | 129       |                                       | unknown [S. aureus subsp. aureus MSSA476]                                               | 7.30E-67  | 100        | 100               | CAG42726.1 |
| 89  | 21287      | 21451    | 54        |                                       | unknown [S. aureus subsp. aureus MSSA476]                                               | 1.50E-25  | 100        | 100               | CAG42727.1 |
| 41  | 21497      | 21796    | 99        |                                       | unknown [S. aureus temperate phage phiSLT]                                              | 7.60E-52  | 100        | 100               | BAB21751.1 |
| 35  | 21932      | 22234    | 100       | Holin                                 | holin [S. aureus bacteriophage PVL]                                                     | 6.40E-51  | 99         | 100               | BAA31897.1 |
| 8   | 22245      | 23699    | 484       | Amidase                               | amidase [S. aureus temperate phage phiSLT]                                              | 0         | 96         | 100               | BAB21753.1 |
| 21  | 24089      | 24604    | 171       | Gamma-hemolysin; Leucocidin S         | Panton-Valentine leukocidin chain S precursor [S. aureus subsp. aureus MW2]             | 1.00E-93  | 99         | 97                | BAB95244.1 |
|     |            |          |           |                                       | gamma-hemolysin component C precursor [S. aureus subsp. aureus MRSA252]                 | 1.10E-68  | 74         | 99                | CAG41490.1 |
| 18  | 24609      | 25223    | 204       | Na/K-ATPase                           | Na/K ATPase [S. aureus phage phi 12]                                                    | 1.00E-107 | 96         | 100               | AAL82283.1 |
| 130 | 25345      | 25220    | 41        |                                       |                                                                                         |           |            |                   |            |

Bacteriophage 3A (continued)

| ORF | Start (nt) | End (nt) | Size (aa) | Predicted Function                           | Representative similarity to proteins in database                                                                                   | E-value       | % Identity | % Length of Match | Accession                |
|-----|------------|----------|-----------|----------------------------------------------|-------------------------------------------------------------------------------------------------------------------------------------|---------------|------------|-------------------|--------------------------|
| 74  | 25585      | 25403    | 60        |                                              | unknown [S. aureus phage phi 12]                                                                                                    | 3.10E-28      | 100        | 100               | AAL82284.1               |
| 53  | 26131      | 26361    | 76        |                                              |                                                                                                                                     |               |            |                   |                          |
| 16  | 26342      | 25656    | 228       | Repressor                                    | cl-like repressor [S. aureus phage phi 11]                                                                                          | 2.00E-92      | 78         | 100               | AAL82233.1               |
| 70  | 26540      | 26752    | 70        |                                              |                                                                                                                                     |               |            |                   |                          |
| 24  | 26800      | 27243    | 147       |                                              | unknown [S. aureus subsp. aureus MRSA252]                                                                                           | 2.90E-78      | 99         | 100               | CAG40553.1               |
| 88  | 27258      | 27407    | 49        |                                              | unknown [S. aureus subsp. aureus MRSA252]                                                                                           | 1.50E-22      | 100        | 100               | CAG40552.1               |
| 63  | 27660      | 27448    | 70        |                                              |                                                                                                                                     |               |            |                   |                          |
| 77  | 27730      | 27927    | 65        |                                              | unknown [S. aureus subsp. aureus MRSA252]                                                                                           | 9.10E-33      | 100        | 100               | CAG40551.1               |
| 31  | 28294      | 27914    | 126       |                                              | unknown [S. aureus subsp. aureus MRSA252]                                                                                           | 9.30E-70      | 100        | 100               | CAG40550.1               |
| 54  | 28361      | 28606    | 81        |                                              | unknown [S. aureus subsp. aureus MRSA252]                                                                                           | 3.50E-42      | 100        | 100               | CAG40549.1               |
| 32  | 28940      | 28575    | 121       |                                              | unknown [S. aureus subsp. aureus MRSA252]                                                                                           | 4.10E-65      | 100        | 100               | CAG40548.1               |
| 67  | 28995      | 29210    | 71        |                                              | unknown [S. aureus subsp. aureus MRSA252]                                                                                           | 4.00E-33      | 100        | 100               | CAG40547.1               |
| 48  | 29235      | 29498    | 87        | Homeodomain-like                             | putative DNA-binding protein [S. aureus subsp. aureus MSSA476]                                                                      | 3.90E-46      | 97         | 100               | CAG42677.1               |
| 93  | 29511      | 29672    | 53        |                                              | putative exported protein [S. aureus subsp. aureus MSSA476]                                                                         | 1.20E-22      | 94         | 100               | CAG43717.1               |
| 38  | 29751      | 30074    | 107       |                                              | unknown [S. aureus subsp. aureus MRSA252]                                                                                           | 4.30E-52      | 93         | 100               | CAG40544.1               |
| 33  | 30089      | 30451    | 120       |                                              | unknown [S. aureus subsp. aureus MRSA252]                                                                                           | 1.90E-57      | 95         | 100               | CAG40543.1               |
| 12  | 30448      | 31614    | 388       |                                              | unknown [S. aureus subsp. aureus MSSA476]                                                                                           | 0             | 99         | 100               | CAG42682.1               |
| 19  | 31640      | 32197    | 185       |                                              | unknown [S. aureus subsp. aureus MRSA252]                                                                                           | 4.00E-100     | 99         | 100               | CAG40541.1               |
| 3   | 32266      | 34218    | 650       | DNA-directed DNA polymerase                  | putative DNA polymerase [S. aureus subsp. aureus MRSA252]                                                                           | 0             | 98         | 100               | CAG40540.1               |
| 79  | 34231      | 34416    | 61        |                                              | unknown [S. aureus subsp. aureus MRSA252]                                                                                           | 1.80E-28      | 100        | 100               | CAG40539.1               |
| 27  | 34416      | 34817    | 133       | DNA-binding                                  | putative DNA-binding protein [S. aureus subsp. aureus MRSA252]                                                                      | 7.80E-74      | 99         | 100               | CAG40538.1               |
| 50  | 34817      | 35071    | 84        |                                              | unknown [S. aureus subsp. aureus MRSA252]                                                                                           | 1.30E-41      | 95         | 100               | CAG40537.1               |
| 49  | 35062      | 35319    | 85        |                                              | unknown [S. aureus subsp. aureus MRSA252]                                                                                           | 1.60E-39      | 94         | 94                | CAG41061.1               |
| 26  | 35330      | 35740    | 136       |                                              | unknown [S. aureus subsp. aureus MSSA476]                                                                                           | 1.90E-40      | 61         | 99                | CAG42690.1               |
| 47  | 35740      | 36015    | 91        |                                              | unknown [S. aureus subsp. aureus MSSA476]                                                                                           | 3.40E-31      | 85         | 80                | CAG42692.1               |
| 52  | 36008      | 36256    | 82        |                                              | orf 52 [S. aureus bacteriophage PVL]                                                                                                | 1.60E-39      | 98         | 100               | BAA31925.1               |
| 20  | 36249      | 36782    | 177       | dUTPase                                      | dUTP pyrophosphatase [S. aureus subsp. aureus Mu50]                                                                                 | 7.00E-93      | 96         | 100               | BAB58136.1               |
| 55  | 36819      | 37064    | 81        |                                              | orf 54 [S. aureus bacteriophage PVL]                                                                                                | 8.50E-33      | 88         | 96                | BAA31927.1               |
| 71  | 37061      | 37267    | 68        |                                              | unknown [S. aureus subsp. aureus MRSA252]                                                                                           | 1.40E-30      | 94         | 100               | CAG41056.1               |
| 91  | 37264      | 37416    | 50        | Transcriptional activator RinB               | transcriptional activator rinB [S. aureus phage phi 12]                                                                             | 9.40E-20      | 92         | 100               | AAL82304.1               |
| 59  | 37484      | 37684    | 66        |                                              | putative exported phage protein [S. aureus subsp. aureus MRSA252]                                                                   | 7.20E-30      | 98         | 100               | CAG40524.1               |
| 2   | 37736      | 40183    | 815       | Virulence-associated E; DNA primase/helicase | virulence-associated protein E [B. cereus ATCC 10987]<br>putative DNA primase/helicase - phage associated [S. pyogenes phage 315.6] | 0<br>3.20E-94 | 44<br>37   | 97<br>74          | AAS39320.1<br>AAM80049.1 |

Bacteriophage 3A (continued)

| ORF | Start (nt) | End (nt) | Size (aa) | Predicted Function                     | Representative similarity to proteins in database                                                                                                       | E-value              | % Identity | % Length of Match | Accession                |
|-----|------------|----------|-----------|----------------------------------------|---------------------------------------------------------------------------------------------------------------------------------------------------------|----------------------|------------|-------------------|--------------------------|
| 76  | 40329      | 40129    | 66        |                                        | unknown [S. aureus subsp. aureus MW2]                                                                                                                   | 5.00E-15             | 90         | 59                | BAB95272.1               |
| 45  | 40524      | 40814    | 96        |                                        | unknown [S. aureus subsp. aureus MSSA476]                                                                                                               | 2.70E-52             | 100        | 100               | CAG42703.1               |
| 9   | 40795      | 42162    | 455       | DEAD/DEAH box helicase                 | phage helicase [S. aureus phage phi 12]                                                                                                                 | 0                    | 100        | 92                | AAL82307.1               |
| 137 | 41951      | 42055    | 34        |                                        |                                                                                                                                                         |                      |            |                   |                          |
| 25  | 42175      | 42612    | 145       | Transcriptional activator RinA         | phage regulatory protein [S. aureus subsp. aureus MRSA252]                                                                                              | 8.40E-78             | 98         | 100               | CAG40520.1               |
| 40  | 42769      | 43083    | 104       | HNH endonuclease; Electron transporter | putative electron transporter [B. licheniformis ATCC 14580]<br>prophage LambdaBa02, HNH endonuclease family protein [B. anthracis str. 'Ames Ancestor'] | 1.40E-18<br>2.80E-14 | 52<br>46   | 89<br>85          | AAU25074.1<br>AAT33216.1 |

## Bacteriophage 47

| ORF | Start (nt) | End (nt) | Size (aa) | Predicted Function       | Representative similarity to proteins in database                                       | E-value   | % Identity | % Length of Match | Accession  |
|-----|------------|----------|-----------|--------------------------|-----------------------------------------------------------------------------------------|-----------|------------|-------------------|------------|
| 38  | 48         | 353      | 101       | Small terminase          | terminase-small subunit [S. aureus phage phi 12]                                        | 5.80E-52  | 100        | 100               | AAL82310.1 |
| 5   | 343        | 2034     | 563       | Large terminase          | large terminase [S. aureus subsp. aureus MSSA476]                                       | 0         | 99         | 100               | CAG42708.1 |
| 9   | 2048       | 3277     | 409       | Portal                   | portal protein [S. aureus temperate phage phiSLT]                                       | 0         | 100        | 100               | BAB21733.1 |
| 16  | 3261       | 4034     | 257       | Clp protease             | scaffolding protease [S. aureus phage phi 12]                                           | 1.00E-142 | 100        | 100               | AAL82313.1 |
| 10  | 4046       | 5209     | 387       | Major capsid             | prophage LambdaBa02, major capsid protein, putative [B. anthracis str. 'Ames Ancestor'] | 5.10E-99  | 51         | 97                | AAT33211.1 |
| 159 | 5157       | 5267     | 36        |                          |                                                                                         |           |            |                   |            |
| 46  | 5278       | 5556     | 92        | DNA packaging            | unknown [S. aureus temperate phage phiSLT]                                              | 9.00E-48  | 100        | 100               | BAB21736.1 |
| 96  | 5396       | 5533     | 45        |                          |                                                                                         |           |            |                   |            |
| 36  | 5568       | 5900     | 110       |                          | unknown [S. aureus subsp. aureus MSSA476]                                               | 4.70E-59  | 100        | 100               | CAG42713.1 |
| 28  | 5897       | 6298     | 133       |                          | unknown [S. aureus subsp. aureus MW2]                                                   | 1.80E-70  | 100        | 100               | BAB95260.1 |
| 29  | 6299       | 6694     | 131       |                          | unknown [S. aureus temperate phage phiSLT]                                              | 1.20E-69  | 99         | 100               | BAB21739.1 |
| 18  | 6729       | 7370     | 213       | Major tail               | major tail protein [S. aureus phage phi 12]                                             | 8.00E-122 | 100        | 100               | AAL82318.1 |
| 24  | 7462       | 7917     | 151       | Major tail               | major tail protein [S. aureus phage phi 12]                                             | 1.80E-81  | 100        | 100               | AAL82319.1 |
| 33  | 7975       | 8325     | 116       |                          | unknown [S. aureus temperate phage phiSLT]                                              | 2.80E-61  | 100        | 100               | BAB21742.1 |
| 93  | 8367       | 8525     | 52        |                          | unknown [S. aureus bacteriophage phi 3A]                                                | 3.10E-23  | 100        | 100               | AAM49604.1 |
| 1   | 8539       | 14739    | 2066      | Tail fiber               | tail fiber protein [S. aureus phage phi 12]                                             | 0         | 100        | 100               | AAL82321.1 |
| 95  | 13577      | 13720    | 47        |                          |                                                                                         |           |            |                   |            |
| 6   | 15572      | 17155    | 527       | Minor structural protein | minor structural protein, putative [L. monocytogenes str. 4b F2365]                     | 7.20E-33  | 36         | 45                | AAT02929.1 |
| 43  | 17155      | 17445    | 96        |                          | unknown [S. aureus subsp. aureus MSSA476]                                               | 9.40E-50  | 99         | 100               | CAG42723.1 |
| 4   | 17461      | 19371    | 636       | Minor structural protein | minor structural protein [Staphylococcus phage 44AHJD]                                  | 7.20E-38  | 27         | 87                | AAO83869.1 |
| 45  | 19371      | 19625    | 84        |                          | unknown [S. aureus subsp. aureus MW2]                                                   | 9.40E-24  | 98         | 66                | BAB95250.1 |
| 40  | 19671      | 19970    | 99        |                          | unknown [S. aureus temperate phage phiSLT]                                              | 1.70E-51  | 99         | 100               | BAB21751.1 |
| 34  | 20106      | 20408    | 100       | Holin                    | holin [S. aureus phage phi 12]                                                          | 2.90E-51  | 100        | 100               | AAL82329.1 |
| 7   | 20419      | 21873    | 484       | Amidase                  | peptidoglycan hydrolase [S. aureus phage phi 12]                                        | 0         | 100        | 100               | AAL82330.1 |
| 125 | 21539      | 21670    | 43        |                          |                                                                                         |           |            |                   |            |
| 103 | 22231      | 22368    | 45        |                          |                                                                                         |           |            |                   |            |
| 14  | 22489      | 23325    | 278       |                          |                                                                                         |           |            |                   |            |
| 71  | 23570      | 23782    | 70        |                          | unknown [S. aureus subsp. aureus MW2]                                                   | 9.30E-06  | 81         | 38                | BAB95308.1 |
| 11  | 25030      | 23825    | 401       | Integrase                | integrase [S. aureus phage phi 12]                                                      | 0         | 100        | 100               | AAL82282.1 |
| 19  | 25156      | 25770    | 204       | Na/K-ATPase              | Na/K ATPase [S. aureus phage phi 12]                                                    | 1.00E-112 | 100        | 100               | AAL82283.1 |
| 136 | 25892      | 25767    | 41        |                          |                                                                                         |           |            |                   |            |

Bacteriophage 47 (continued)

| ORF | Start (nt) | End (nt) | Size (aa) | Predicted Function                           | Representative similarity to proteins in database                  | E-value   | % Identity | % Length of Match | Accession   |
|-----|------------|----------|-----------|----------------------------------------------|--------------------------------------------------------------------|-----------|------------|-------------------|-------------|
| 83  | 26131      | 25949    | 60        |                                              | unknown [S. aureus phage phi 12]                                   | 3.10E-28  | 100        | 100               | AAL82284.1  |
| 13  | 27147      | 26227    | 306       | DNA polymerase III; Exonuclease              | probable DNA polymerase III epsilon chain [C. perfringens str. 13] | 7.20E-47  | 38         | 99                | BAB811107.1 |
| 20  | 27777      | 27163    | 204       | LexA repressor                               | LexA repressor [B. cereus ATCC 14579]                              | 5.00E-25  | 35         | 100               | AAP10633.1  |
| 60  | 27949      | 28176    | 75        |                                              | unknown [E. faecalis V583]                                         | 2.40E-06  | 36         | 100               | AAO82185.1  |
| 17  | 28202      | 28978    | 258       | Antirepressor                                | similar to anti-repressor [S. aureus subsp. aureus Mu50]           | 6.00E-134 | 93         | 99                | BAB57017.1  |
| 30  | 28515      | 28126    | 129       |                                              |                                                                    |           |            |                   |             |
| 65  | 28994      | 29212    | 72        |                                              |                                                                    |           |            |                   |             |
| 52  | 29262      | 29507    | 81        |                                              | unknown [S. aureus subsp. aureus MRSA252]                          | 1.00E-41  | 99         | 100               | CAG40549.1  |
| 31  | 29841      | 29476    | 121       |                                              | unknown [S. aureus temperate phage phiSLT]                         | 4.10E-65  | 100        | 100               | BAB21704.1  |
| 67  | 29896      | 30111    | 71        |                                              | unknown [S. aureus temperate phage phiSLT]                         | 2.60E-32  | 99         | 100               | BAB21705.1  |
| 47  | 30136      | 30399    | 87        | DNA-binding; Homeodomain-like                | putative DNA-binding protein [S. aureus subsp. aureus MSSA476]     | 3.90E-46  | 97         | 100               | CAG42677.1  |
| 92  | 30412      | 30573    | 53        |                                              | putative exported protein [S. aureus subsp. aureus MRSA252]        | 2.60E-22  | 94         | 100               | CAG41074.1  |
| 161 | 30542      | 30432    | 36        |                                              |                                                                    |           |            |                   |             |
| 37  | 30652      | 30975    | 107       |                                              | unknown [S. aureus subsp. aureus MRSA252]                          | 1.30E-53  | 97         | 100               | CAG40544.1  |
| 32  | 30990      | 31352    | 120       |                                              | unknown [S. aureus subsp. aureus MW2]                              | 4.50E-59  | 98         | 100               | BAB95293.1  |
| 12  | 31349      | 32515    | 388       |                                              | unknown [S. aureus subsp. aureus MSSA476]                          | 0         | 97         | 100               | CAG42682.1  |
| 22  | 32541      | 33098    | 185       |                                              | unknown [S. aureus phage phi 12]                                   | 1.00E-100 | 100        | 100               | AAL82292.1  |
| 3   | 33158      | 35119    | 653       | DNA-directed DNA polymerase                  | DNA polymerase A domain [S. aureus phage phi 12]                   | 0         | 100        | 99                | AAL82293.1  |
| 81  | 35132      | 35317    | 61        |                                              | unknown [S. aureus subsp. aureus MSSA476]                          | 1.80E-28  | 100        | 100               | CAG42685.1  |
| 26  | 35317      | 35718    | 133       | DNA-binding                                  | putative DNA-binding protein [S. aureus subsp. aureus MSSA476]     | 5.60E-72  | 97         | 100               | CAG42686.1  |
| 48  | 35718      | 35975    | 85        |                                              | unknown [S. aureus phage phi 12]                                   | 4.80E-44  | 100        | 100               | AAL82296.1  |
| 68  | 35978      | 36178    | 66        |                                              | unknown [S. aureus subsp. aureus MRSA252]                          | 2.10E-29  | 92         | 100               | CAG40536.1  |
| 73  | 36449      | 36655    | 68        |                                              | unknown [S. aureus subsp. aureus MSSA476]                          | 5.30E-33  | 97         | 100               | CAG42689.1  |
| 35  | 37056      | 37403    | 115       | Sensor                                       | possible sensor protein [S. aureus phage phi 13]                   | 2.80E-56  | 93         | 100               | AAL82351.1  |
| 41  | 37400      | 37708    | 102       |                                              | unknown [S. aureus subsp. aureus MSSA476]                          | 8.90E-53  | 97         | 100               | CAG42692.1  |
| 53  | 37701      | 37937    | 78        |                                              | unknown [S. aureus subsp. aureus MSSA476]                          | 1.30E-36  | 96         | 100               | CAG42693.1  |
| 21  | 37942      | 38484    | 180       | dUTPase                                      | dUTPase [S. aureus phage phi 12]                                   | 5.80E-98  | 100        | 100               | AAL82303.1  |
| 79  | 38521      | 38709    | 62        |                                              | orf 55 [S. aureus bacteriophage PVL]                               | 1.50E-27  | 92         | 100               | BAA31928.1  |
| 74  | 38684      | 38884    | 66        |                                              | orf 56 [S. aureus bacteriophage PVL]                               | 1.10E-30  | 100        | 100               | BAA31929.1  |
| 90  | 38884      | 39039    | 51        | Transcriptional activator RinB               | transcriptional activator rinB [S. aureus phage phi 12]            | 7.60E-22  | 100        | 100               | AAL82304.1  |
| 57  | 39107      | 39307    | 66        |                                              | putative exported phage protein [S. aureus subsp. aureus MRSA252]  | 4.20E-30  | 100        | 100               | CAG40524.1  |
| 2   | 39359      | 41806    | 815       | Virulence-associated E; DNA primase/helicase | virulence-associated protein E [B. cereus ATCC 10987]              | 0         | 44         | 97                | AAS39320.1  |
|     |            |          |           |                                              | putative DNA primase/helicase [S. pyogenes phage 315.6]            | 7.20E-94  | 37         | 71                | AAM80049.1  |
| 143 | 41952      | 41830    | 40        |                                              | unknown [S. aureus subsp. aureus MW2]                              | 3.80E-16  | 93         | 100               | BAB95272.1  |

Bacteriophage 47 (continued)

| ORF | Start (nt) | End (nt) | Size (aa) | Predicted Function                     | Representative similarity to proteins in database                                                                                                       | E-value              | % Identity | % Length of Match | Accession                |
|-----|------------|----------|-----------|----------------------------------------|---------------------------------------------------------------------------------------------------------------------------------------------------------|----------------------|------------|-------------------|--------------------------|
| 185 | 42013      | 41909    | 34        |                                        |                                                                                                                                                         |                      |            |                   |                          |
| 44  | 42147      | 42437    | 96        |                                        | phi related protein [S. aureus phage phi 12]                                                                                                            | 2.70E-52             | 100        | 100               | AAL82306.1               |
| 8   | 42418      | 43785    | 455       | SNF Helicase; DEAD/DEAH box helicase   | phage helicase [S. aureus phage phi 12]                                                                                                                 | 0                    | 100        | 92                | AAL82307.1               |
| 25  | 43798      | 44235    | 145       | Transcriptional activator RinA         | phage regulatory protein [S. aureus subsp. aureus MSSA476]                                                                                              | 1.20E-79             | 99         | 100               | CAG42705.1               |
| 39  | 44392      | 44706    | 104       | HNH endonuclease; Electron transporter | putative electron transporter [B. licheniformis ATCC 14580]<br>prophage LambdaBa02, HNH endonuclease family protein [B. anthracis str. 'Ames Ancestor'] | 1.40E-18<br>2.80E-14 | 52<br>46   | 89<br>85          | AAU25074.1<br>AAT33216.1 |

## Bacteriophage 37

| ORF | Start (nt) | End (nt) | Size (aa) | Predicted Function                 | Representative similarity to proteins in database                       | E-value   | % Identity | % Length of Match | Accession  |
|-----|------------|----------|-----------|------------------------------------|-------------------------------------------------------------------------|-----------|------------|-------------------|------------|
| 35  | 22         | 453      | 143       | Small terminase                    | putative small terminase [S. pyogenes phage 315.6]                      | 2.00E-34  | 57         | 95                | AAM80043.1 |
| 9   | 453        | 1712     | 419       | Large terminase                    | putative large terminase [S. pyogenes phage 315.5]                      | 1.00E-117 | 75         | 63                | AAM79934.1 |
| 7   | 1718       | 3124     | 468       | Portal                             | portal protein [Bacteriophage SPP1]                                     | 1.30E-67  | 35         | 97                | CAA39541.1 |
| 11  | 3096       | 4040     | 314       | Head morphogenesis                 | ORF42 (product required for head morphogenesis) [bacteriophage phi ETA] | 5.00E-122 | 69         | 98                | BAA97628.1 |
| 23  | 4167       | 4760     | 197       | Minor capsid                       | ORF43 (minor capsid protein) [bacteriophage phi ETA]                    | 1.90E-71  | 63         | 100               | BAA97629.1 |
| 13  | 4779       | 5603     | 274       | Major capsid                       | major capsid protein [temperate phage PhiNIH1.1]                        | 9.00E-67  | 49         | 97                | AAL15075.1 |
| 53  | 5616       | 5897     | 93        | Rho termination factor, N-terminal | unknown [S. pyogenes phage 315.5]                                       | 1.90E-13  | 45         | 100               | AAM79928.1 |
| 50  | 5897       | 6193     | 98        | Head morphogenesis                 | ORF46 (product required for head morphogenesis) [bacteriophage phi ETA] | 1.90E-26  | 53         | 100               | BAA97632.1 |
| 47  | 6195       | 6530     | 111       | Head-tail adaptor                  | ORF47 [bacteriophage phi ETA]                                           | 2.50E-36  | 59         | 100               | BAA97633.1 |
| 40  | 6517       | 6930     | 137       |                                    | ORF48 [bacteriophage phi ETA]                                           | 3.10E-43  | 65         | 84                | BAA97634.1 |
| 106 | 6740       | 6892     | 50        |                                    |                                                                         |           |            |                   |            |
| 38  | 6942       | 7364     | 140       |                                    | ORF49 [bacteriophage phi ETA]                                           | 4.30E-37  | 52         | 100               | BAA97635.1 |
| 24  | 7368       | 7931     | 187       | Major tail                         | ORF50 [bacteriophage phi ETA]                                           | 4.40E-35  | 48         | 85                | BAA97636.1 |
| 26  | 7989       | 8486     | 165       |                                    | ORF51 [bacteriophage phi ETA]                                           | 4.90E-31  | 41         | 96                | BAA97637.1 |
| 1   | 8838       | 11843    | 1001      | Minor tail; Tape measure protein   | tape measure protein [S. aureus phage phi 11]                           | 0         | 43         | 92                | AAL82270.1 |
| 22  | 11862      | 12776    | 304       |                                    | ORF54 [bacteriophage phi ETA]                                           | 2.30E-53  | 38         | 100               | BAA97640.1 |
| 153 | 12704      | 12573    | 43        |                                    |                                                                         |           |            |                   |            |
| 8   | 12785      | 14287    | 500       | Endopeptidase                      | Phage endopeptidase [S. pyogenes MGAS10394]                             | 9.80E-24  | 25         | 57                | AAT86193.1 |
| 3   | 14290      | 16953    | 887       | Pre-neck appendage                 | pre-neck appendage protein                                              | 3.00E-129 | 37         | 86                | AAA32285.1 |
| 5   | 16946      | 18442    | 498       |                                    | unknown [S. aureus subsp. aureus MRSA252]                               | 1.80E-41  | 29         | 76                | CAG40500.1 |
| 29  | 18456      | 18818    | 120       |                                    |                                                                         |           |            |                   |            |
| 143 | 18808      | 18942    | 44        |                                    |                                                                         |           |            |                   |            |
| 32  | 18954      | 19397    | 147       |                                    |                                                                         |           |            |                   |            |
| 43  | 19390      | 19779    | 129       |                                    |                                                                         |           |            |                   |            |
| 72  | 19790      | 19563    | 75        |                                    |                                                                         |           |            |                   |            |
| 4   | 19829      | 21748    | 639       | Amidase                            | cell wall hydrolase [S. aureus phage phi 11]                            | 0         | 57         | 100               | AAL82277.1 |
| 2   | 21761      | 24346    | 861       | Tail fiber; Collagen helix repeat  | tail fiber [S. aureus phage phi 11]                                     | 3.70E-48  | 37         | 39                | AAL82278.1 |
| 37  | 24389      | 24811    | 140       | Holin                              | holin [S. aureus phage phi 11]                                          | 8.70E-46  | 61         | 100               | AAL82280.1 |
| 78  | 24597      | 24764    | 55        |                                    |                                                                         |           |            |                   |            |
| 6   | 24792      | 26237    | 481       | Amidase                            | amidase [S. aureus phage phi 11]                                        | 0         | 83         | 100               | AAL82281.1 |
| 80  | 26114      | 25917    | 65        |                                    |                                                                         |           |            |                   |            |

Bacteriophage 37 (continued)

| ORF | Start (nt) | End (nt) | Size (aa) | Predicted Function           | Representative similarity to proteins in database              | E-value   | % Identity | % Length of Match | Accession  |
|-----|------------|----------|-----------|------------------------------|----------------------------------------------------------------|-----------|------------|-------------------|------------|
| 10  | 27951      | 26923    | 342       | Integrase                    | integrase [S. aureus subsp. aureus MW2]                        | 2.00E-100 | 50         | 100               | BAB95804.1 |
| 14  | 28803      | 28015    | 262       |                              | unknown [S. aureus subsp. aureus MW2]                          | 3.00E-129 | 85         | 99                | BAB95635.1 |
| 31  | 29271      | 28816    | 151       |                              | unknown [S. aureus subsp. aureus MW2]                          | 1.00E-68  | 80         | 100               | BAB95634.1 |
| 69  | 29522      | 29289    | 77        |                              | unknown [S. epidermidis ATCC 12228]                            | 1.10E-24  | 65         | 100               | AAO04167.1 |
| 52  | 29829      | 29572    | 85        |                              | unknown [S. epidermidis ATCC 12228]                            | 6.50E-17  | 46         | 94                | AAO05977.1 |
| 39  | 30303      | 29881    | 140       |                              | unknown [S. aureus]                                            | 4.60E-39  | 56         | 100               | AAL04145.1 |
| 133 | 30460      | 30317    | 47        |                              |                                                                |           |            |                   |            |
| 19  | 31106      | 30480    | 208       | LexA repressor               | LexA repressor [B. cereus ATCC 14579]                          | 7.00E-22  | 32         | 100               | AAP10633.1 |
| 71  | 31258      | 31485    | 75        | Repressor                    |                                                                |           |            |                   |            |
| 110 | 31396      | 31238    | 52        |                              |                                                                |           |            |                   |            |
| 33  | 31505      | 31951    | 148       |                              | unknown [S. aureus subsp. aureus MRSA252]                      | 5.60E-32  | 49         | 100               | CAG40553.1 |
| 16  | 31965      | 32738    | 257       | Antirepressor                | anti-repressor [S. aureus phage phi 11]                        | 2.30E-93  | 69         | 100               | AAL82235.1 |
| 66  | 32739      | 32975    | 78        |                              | unknown [S. aureus subsp. aureus Mu50]                         | 1.20E-05  | 39         | 84                | BAB58186.1 |
| 137 | 32988      | 33128    | 46        |                              |                                                                |           |            |                   |            |
| 48  | 33318      | 33088    | 76        |                              | orf 11 [S. aureus prophage phiPV83]                            | 1.80E-06  | 29         | 100               | BAA97818.1 |
| 49  | 33365      | 33667    | 100       |                              | unknown [S. aureus subsp. aureus MSSA476]                      | 1.40E-10  | 31         | 99                | CAG43718.1 |
| 76  | 33680      | 33895    | 71        |                              |                                                                |           |            |                   |            |
| 92  | 33725      | 33549    | 58        |                              |                                                                |           |            |                   |            |
| 62  | 34000      | 34239    | 79        |                              |                                                                |           |            |                   |            |
| 59  | 34232      | 34486    | 84        |                              | unknown [S. aureus subsp. aureus Mu50]                         | 2.50E-21  | 63         | 85                | BAB57024.1 |
| 18  | 34449      | 35087    | 212       | ssDNA-binding                | unknown [S. aureus temperate phage phiSLT]                     | 1.00E-79  | 69         | 100               | BAB21711.1 |
| 34  | 35084      | 35530    | 148       | ssDNA-binding                | ssDNA-binding protein [S. aureus bacteriophage PVL]            | 2.00E-50  | 63         | 100               | BAA31919.1 |
| 17  | 35543      | 36220    | 225       |                              | unknown [S. aureus temperate phage phiSLT]                     | 7.00E-101 | 75         | 99                | BAB21713.1 |
| 45  | 36210      | 36560    | 116       |                              |                                                                |           |            |                   |            |
| 12  | 36553      | 37335    | 260       | DNA replication              | DnaA analog [Bacteriophage LL-H]                               | 4.30E-15  | 39         | 53                | AAL77546.1 |
| 15  | 37337      | 38113    | 258       | DNA replication protein DnaC | dnaC [S. aureus phage phi 13]                                  | 5.30E-82  | 59         | 100               | AAL82346.1 |
| 87  | 38107      | 38295    | 62        |                              | unknown [S. aureus subsp. aureus Mu50]                         | 1.10E-06  | 41         | 79                | BAB57032.1 |
| 42  | 38279      | 38686    | 135       | Endodeoxyribonuclease RusA   | unknown [S. aureus subsp. aureus MSSA476]                      | 8.90E-46  | 61         | 99                | CAG43708.1 |
| 105 | 38687      | 38878    | 63        |                              |                                                                |           |            |                   |            |
| 89  | 38818      | 38630    | 62        |                              |                                                                |           |            |                   |            |
| 25  | 38891      | 39415    | 174       | DNA-binding                  | putative DNA-binding protein [S. aureus subsp. aureus MSSA476] | 1.30E-06  | 30         | 64                | CAG42686.1 |
| 166 | 39085      | 38963    | 40        |                              |                                                                |           |            |                   |            |
| 28  | 39416      | 39886    | 156       |                              | unknown [S. aureus subsp. aureus MSSA476]                      | 6.60E-08  | 43         | 44                | CAG42687.1 |



Bacteriophage 37 (continued)

| ORF | Start (nt) | End (nt) | Size (aa) | Predicted Function             | Representative similarity to proteins in database | E-value  | % Identity | % Length of Match | Accession  |
|-----|------------|----------|-----------|--------------------------------|---------------------------------------------------|----------|------------|-------------------|------------|
| 83  | 39887      | 40081    | 64        |                                |                                                   |          |            |                   |            |
| 27  | 40071      | 40535    | 154       | Sensor                         | possible sensor protein [S. aureus phage phi 13]  | 1.30E-08 | 33         | 97                | AAL82351.1 |
| 41  | 40552      | 40959    | 135       | Sensor                         | possible sensor protein [S. aureus phage phi 13]  | 7.10E-11 | 33         | 95                | AAL82351.1 |
| 58  | 40946      | 41152    | 68        |                                |                                                   |          |            |                   |            |
| 30  | 41142      | 41570    | 142       |                                |                                                   |          |            |                   |            |
| 65  | 41570      | 41806    | 78        |                                |                                                   |          |            |                   |            |
| 36  | 41806      | 42228    | 140       | dUTPase                        | dUTPase [S. aureus bacteriophage PVL]             | 8.50E-25 | 40         | 100               | BAA31926.1 |
| 88  | 42270      | 42458    | 62        |                                |                                                   |          |            |                   |            |
| 56  | 42464      | 42730    | 88        |                                |                                                   |          |            |                   |            |
| 98  | 42723      | 42899    | 58        | Transcriptional activator RinB | rinB [S. aureus phage phi 11]                     | 5.20E-07 | 46         | 100               | AAL82255.1 |
| 95  | 42899      | 43081    | 60        |                                |                                                   |          |            |                   |            |
| 44  | 43074      | 43478    | 134       |                                | unknown [B. cereus ATCC 14579]                    | 7.20E-11 | 30         | 99                | AAP10629.1 |

## Bacteriophage EW

| ORF | Start (nt) | End (nt) | Size (aa) | Predicted Function                 | Representative similarity to proteins in database                       | E-value   | % Identity | % Length of Match | Accession  |
|-----|------------|----------|-----------|------------------------------------|-------------------------------------------------------------------------|-----------|------------|-------------------|------------|
| 36  | 32         | 412      | 126       |                                    | unknown [S. pyogenes SSI-1]                                             | 1.40E-09  | 39         | 70                | BAC63628.1 |
| 9   | 396        | 1661     | 421       | Large terminase                    | putative large terminase [Bacteriophage A118]                           | 3.60E-45  | 31         | 100               | CAB53788.1 |
| 8   | 1667       | 3091     | 474       | Portal                             | portal protein [Bacteriophage SPP1]                                     | 3.60E-73  | 35         | 100               | CAA39541.1 |
| 12  | 3054       | 4001     | 315       | Head morphogenesis                 | ORF42 (product required for head morphogenesis) [bacteriophage phi ETA] | 4.00E-133 | 75         | 98                | BAA97628.1 |
| 147 | 3974       | 4108     | 44        |                                    |                                                                         |           |            |                   |            |
| 74  | 4112       | 4336     | 74        |                                    |                                                                         |           |            |                   |            |
| 22  | 4451       | 5047     | 198       | Minor capsid                       | minor capsid protein [Bacteriophage phig1e]                             | 5.80E-15  | 24         | 100               | CAA66737.1 |
| 15  | 5064       | 5891     | 275       | Major capsid                       | major capsid protein [temperate phage PhiNIH1.1]                        | 2.80E-60  | 48         | 94                | AAL15075.1 |
| 55  | 5910       | 6191     | 93        | Rho termination factor, N-terminal | ORF45 [bacteriophage phi ETA]                                           | 1.60E-20  | 51         | 100               | BAA97631.1 |
| 52  | 6191       | 6487     | 98        | Head morphogenesis                 | ORF46 (product required for head morphogenesis) [bacteriophage phi ETA] | 1.40E-32  | 67         | 100               | BAA97632.1 |
| 43  | 6492       | 6827     | 111       | Head-tail adaptor                  | ORF47 [bacteriophage phi ETA]                                           | 3.40E-33  | 57         | 100               | BAA97633.1 |
| 33  | 6814       | 7221     | 135       |                                    | ORF48 [bacteriophage phi ETA]                                           | 2.10E-47  | 74         | 85                | BAA97634.1 |
| 29  | 7233       | 7655     | 140       |                                    | ORF49 [bacteriophage phi ETA]                                           | 4.90E-41  | 62         | 95                | BAA97635.1 |
| 23  | 7659       | 8201     | 180       | Major tail                         | ORF50 [bacteriophage phi ETA]                                           | 2.00E-42  | 49         | 100               | BAA97636.1 |
| 99  | 8264       | 8767     | 167       |                                    | ORF51 [bacteriophage phi ETA]                                           | 2.80E-61  | 68         | 96                | BAA97637.1 |
| 57  | 8818       | 9096     | 92        |                                    | ORF52 [bacteriophage phi ETA]                                           | 1.40E-16  | 44         | 100               | BAA97638.1 |
| 1   | 9100       | 12027    | 975       | Tape measure protein               | tape measure protein [S. aureus phage phi 11]                           | 0         | 44         | 94                | AAL82270.1 |
| 196 | 11210      | 11320    | 36        |                                    |                                                                         |           |            |                   |            |
| 38  | 12040      | 12972    | 310       |                                    | ORF54 [bacteriophage phi ETA]                                           | 2.00E-102 | 59         | 100               | BAA97640.1 |
| 6   | 12985      | 14844    | 619       | Endopeptidase                      | phage endopeptidase [S. pyogenes MGAS10394]                             | 4.20E-27  | 28         | 47                | AAT86193.1 |
| 159 | 14678      | 14806    | 42        |                                    |                                                                         |           |            |                   |            |
| 5   | 14856      | 16586    | 576       |                                    | ORF56 [bacteriophage phi ETA]                                           | 3.90E-11  | 28         | 23                | BAA97642.1 |
| 4   | 16601      | 18337    | 578       |                                    | ORF572 [bacteriophage phi ETA]                                          | 7.60E-31  | 28         | 54                | BAA97643.1 |
| 44  | 18334      | 18666    | 110       |                                    |                                                                         |           |            |                   |            |
| 148 | 18663      | 18797    | 44        |                                    |                                                                         |           |            |                   |            |
| 51  | 18820      | 19116    | 98        |                                    | unknown [S. aureus temperate phage phiSLT]                              | 4.00E-16  | 43         | 90                | BAB21751.1 |
| 3   | 19244      | 21136    | 630       | Amidase                            | cell wall hydrolase [S. aureus subsp. aureus Mu50]                      | 0         | 52         | 100               | BAB57071.1 |
| 39  | 19335      | 19592    | 85        |                                    |                                                                         |           |            |                   |            |
| 2   | 21153      | 23879    | 908       | Tail fiber                         | tail fiber [S. aureus subsp. aureus Mu50]                               | 3.00E-56  | 53         | 22                | BAB57072.1 |
| 63  | 22012      | 21761    | 83        | Structural                         | collagen-like protein [B. thuringiensis serovar israelensis]            | 1.50E-08  | 52         | 50                | AAB16964.1 |
| 164 | 22792      | 22667    | 41        |                                    |                                                                         |           |            |                   |            |

## Bacteriophage EW (continued)

| ORF | Start (nt) | End (nt) | Size (aa) | Predicted Function               | Representative similarity to proteins in database                   | E-value   | % Identity | % Length of Match | Accession  |
|-----|------------|----------|-----------|----------------------------------|---------------------------------------------------------------------|-----------|------------|-------------------|------------|
| 27  | 23925      | 24359    | 144       | Holin                            | holin [S. aureus phage phi 11]                                      | 2.60E-42  | 65         | 92                | AAL82280.1 |
| 7   | 24340      | 25788    | 482       | Amidase                          | amidase [S. aureus phage phi 11]                                    | 0         | 77         | 99                | AAL82281.1 |
| 165 | 24701      | 24808    | 35        |                                  |                                                                     |           |            |                   |            |
| 11  | 28263      | 27229    | 344       | Integrase                        | integrase [S. aureus phage phi 13]                                  | 8.10E-82  | 42         | 98                | AAL82331.1 |
| 14  | 29158      | 28325    | 277       |                                  | unknown [N. europaea ATCC 19718]                                    | 1.20E-74  | 50         | 97                | CAD86410.1 |
| 25  | 29660      | 29196    | 154       |                                  | unknown [S. aureus subsp. aureus Mu50]                              | 1.30E-48  | 61         | 99                | BAB57012.1 |
| 47  | 30013      | 29684    | 109       | Repressor                        | putative phage regulatory protein [S. aureus subsp. aureus MSSA476] | 1.20E-35  | 67         | 98                | CAG42672.1 |
| 71  | 30178      | 30387    | 69        | Repressor                        | putative phage regulatory protein [S. aureus subsp. aureus MSSA476] | 8.20E-10  | 48         | 94                | CAG42673.1 |
| 13  | 30426      | 31337    | 303       | ParB-like nuclease               | ParB-like nuclease domain protein [Treponema denticola ATCC 35405]  | 2.20E-16  | 42         | 34                | AAS12707.1 |
| 17  | 31330      | 32100    | 256       |                                  | unknown [E. faecalis V583]                                          | 1.10E-15  | 25         | 100               | AAO82012.1 |
| 100 | 32160      | 32339    | 59        |                                  | ORF8 [bacteriophage phi ETA]                                        | 8.20E-21  | 78         | 100               | BAA97594.1 |
| 65  | 32568      | 32329    | 79        |                                  |                                                                     |           |            |                   |            |
| 16  | 32625      | 33401    | 258       | Antirepressor                    | antirepressor [S. aureus temperate phage phiSLT]                    | 3.70E-75  | 74         | 66                | BAB21701.1 |
| 79  | 33436      | 33585    | 49        |                                  |                                                                     |           |            |                   |            |
| 133 | 33733      | 33876    | 47        |                                  | unknown [S. aureus subsp. aureus MSSA476]                           | 1.70E-16  | 91         | 97                | CAG43720.1 |
| 82  | 34084      | 34290    | 68        |                                  |                                                                     |           |            |                   |            |
| 20  | 34545      | 33886    | 219       |                                  | unknown [S. aureus subsp. aureus Mu50]                              | 6.00E-105 | 87         | 98                | BAB57020.1 |
| 40  | 34693      | 34998    | 101       |                                  | unknown [S. epidermidis ATCC 12228]                                 | 4.30E-07  | 31         | 84                | AAO05105.1 |
| 123 | 35003      | 35158    | 51        |                                  |                                                                     |           |            |                   |            |
| 154 | 35348      | 35229    | 39        |                                  |                                                                     |           |            |                   |            |
| 61  | 35390      | 35659    | 89        |                                  |                                                                     |           |            |                   |            |
| 77  | 35656      | 35874    | 72        |                                  | unknown [S. aureus subsp. aureus Mu50]                              | 2.10E-13  | 49         | 98                | BAB57024.1 |
| 21  | 35871      | 36494    | 207       | ssDNA-binding; Recombination     | recombination protein [temperate phage PhiNIH1.1]                   | 6.30E-39  | 45         | 100               | AAL15054.1 |
| 34  | 36494      | 36892    | 132       | ssDNA-binding                    | single strand DNA-binding protein [S. aureus subsp. aureus Mu50]    | 1.10E-19  | 39         | 100               | BAB57026.1 |
| 19  | 36904      | 37575    | 223       |                                  | unknown [S. aureus temperate phage phiSLT]                          | 4.10E-95  | 73         | 99                | BAB21713.1 |
| 84  | 37572      | 37778    | 68        | Repressor                        | transcriptional regulator [S. pneumoniae TIGR4]                     | 3.80E-07  | 38         | 92                | AAK75240.1 |
| 18  | 37771      | 38475    | 234       | DnaD and phage-associated domain | putative replication protein [L. phage BK5-T]                       | 2.20E-09  | 31         | 61                | AAK56827.1 |
| 41  | 38480      | 38827    | 115       |                                  |                                                                     |           |            |                   |            |
| 10  | 38820      | 40058    | 412       | DnaB-like helicase               | helicase DnaB [S. aureus phage phi 11]                              | 4.00E-115 | 53         | 98                | AAL82244.1 |
| 78  | 40055      | 40273    | 72        |                                  |                                                                     |           |            |                   |            |
| 31  | 40260      | 40676    | 138       | Endodeoxyribonuclease RusA       | unknown [S. aureus subsp. aureus Mu50]                              | 4.80E-28  | 49         | 86                | BAB58142.2 |
| 26  | 40678      | 41106    | 142       |                                  |                                                                     |           |            |                   |            |
| 90  | 41106      | 41300    | 64        |                                  |                                                                     |           |            |                   |            |

Bacteriophage EW (continued)

| ORF | Start (nt) | End (nt) | Size (aa) | Predicted Function             | Representative similarity to proteins in database                              | E-value  | % Identity | % Length of Match | Accession  |
|-----|------------|----------|-----------|--------------------------------|--------------------------------------------------------------------------------|----------|------------|-------------------|------------|
| 46  | 41293      | 41601    | 102       |                                | unknown [S. aureus subsp. aureus N315]                                         | 2.90E-11 | 47         | 79                | BAB43065.1 |
| 72  | 41598      | 41810    | 70        |                                |                                                                                |          |            |                   |            |
| 101 | 41823      | 42002    | 59        |                                |                                                                                |          |            |                   |            |
| 37  | 42021      | 42401    | 126       |                                | unknown [S. aureus subsp. aureus MRSA252]                                      | 3.70E-18 | 40         | 100               | CAG40534.1 |
| 69  | 42398      | 42637    | 79        |                                |                                                                                |          |            |                   |            |
| 58  | 42621      | 42896    | 91        |                                | unknown [N. farcinica IFM 10152]                                               | 3.80E-14 | 43         | 90                | BAD56358.1 |
| 35  | 42880      | 43239    | 119       | Staphylococcus nuclease        | Staphylococcal nuclease family protein [L. interrogans serovar lai str. 56601] | 7.00E-12 | 35         | 85                | AAN50918.1 |
| 114 | 43487      | 43648    | 53        |                                | unknown [S. aureus subsp. aureus MW2]                                          | 4.20E-20 | 85         | 100               | BAB95281.1 |
| 24  | 43659      | 44168    | 169       | dUTPase                        | dUTPase [S. aureus phage phi 11]                                               | 9.60E-57 | 68         | 100               | AAL82253.1 |
| 201 | 44110      | 44217    | 35        |                                |                                                                                |          |            |                   |            |
| 204 | 44222      | 44329    | 35        |                                |                                                                                |          |            |                   |            |
| 127 | 44330      | 44479    | 49        |                                |                                                                                |          |            |                   |            |
| 30  | 44479      | 44898    | 139       | Transcriptional activator RinA | Phage transcriptional activator [S. pyogenes MGAS10394]                        | 2.10E-07 | 31         | 94                | AAT86175.1 |

## Bacteriophage 96

| ORF | Start (nt) | End (nt) | Size (aa) | Predicted Function       | Representative similarity to proteins in database                       | E-value   | % Identity | % Length of Match | Accession  |
|-----|------------|----------|-----------|--------------------------|-------------------------------------------------------------------------|-----------|------------|-------------------|------------|
| 27  | 194        | 655      | 153       |                          | ORF39 [bacteriophage phi ETA]                                           | 7.10E-44  | 82         | 69                | BAA97625.1 |
| 9   | 648        | 1871     | 407       | Large terminase          | terminase, large subunit [Bacteriophage EJ-1]                           | 1.70E-28  | 26         | 97                | CAE82121.1 |
| 7   | 1868       | 3292     | 474       | Portal                   | phage portal protein [C. tetani E88]                                    | 1.80E-32  | 27         | 94                | AAO36104.1 |
| 12  | 3261       | 4214     | 317       | Head morphogenesis       | ORF42 (product required for head morphogenesis) [bacteriophage phi ETA] | 2.00E-157 | 89         | 97                | BAA97628.1 |
| 66  | 4216       | 4422     | 68        |                          |                                                                         |           |            |                   |            |
| 46  | 4277       | 4083     | 64        |                          |                                                                         |           |            |                   |            |
| 19  | 4525       | 5109     | 194       | Structural               | putative scaffold protein [LactoB. johnsonii prophage Lj965]            | 8.80E-05  | 24         | 92                | AAR27459.1 |
| 13  | 5126       | 6040     | 304       | Major capsid             | major capsid protein [Bacteriophage A118]                               | 1.70E-64  | 44         | 99                | CAB53792.1 |
| 132 | 6049       | 6195     | 48        |                          |                                                                         |           |            |                   |            |
| 41  | 6201       | 6551     | 116       | Head morphogenesis       | phage related protein [B. subtilis phage PBSX]                          | 3.10E-07  | 32         | 83                | AAU23019.1 |
| 44  | 6554       | 6898     | 114       | Head-tail adaptor        | ORF47 [bacteriophage phi ETA]                                           | 5.50E-36  | 61         | 96                | BAA97633.1 |
| 29  | 6849       | 7298     | 149       |                          | ORF48 [bacteriophage phi ETA]                                           | 3.00E-41  | 64         | 77                | BAA97634.1 |
| 81  | 7108       | 7308     | 66        |                          |                                                                         |           |            |                   |            |
| 31  | 7311       | 7736     | 141       |                          | ORF49 [bacteriophage phi ETA]                                           | 3.50E-39  | 58         | 99                | BAA97635.1 |
| 20  | 7737       | 8294     | 185       | Major tail               | ORF50 [bacteriophage phi ETA]                                           | 1.30E-42  | 50         | 98                | BAA97636.1 |
| 39  | 8502       | 8867     | 121       |                          | ORF51 [bacteriophage phi ETA]                                           | 2.10E-32  | 58         | 95                | BAA97637.1 |
| 1   | 9200       | 12343    | 1047      | Tape measure protein     | tape measure protein [S. aureus phage phi 11]                           | 3.00E-165 | 38         | 87                | AAL82270.1 |
| 34  | 11133      | 10729    | 134       |                          |                                                                         |           |            |                   |            |
| 17  | 12201      | 11482    | 239       |                          |                                                                         |           |            |                   |            |
| 102 | 12764      | 12946    | 60        |                          |                                                                         |           |            |                   |            |
| 43  | 12943      | 13299    | 118       |                          | ORF54 [bacteriophage phi ETA]                                           | 6.10E-56  | 84         | 100               | BAA97640.1 |
| 3   | 13310      | 15196    | 628       | Endopeptidase            | phage endopeptidase [S. pyogenes MGAS10394]                             | 4.40E-24  | 25         | 48                | AAT86193.1 |
| 2   | 15209      | 17107    | 632       | Minor structural protein | minor structural protein [S. aureus phage phiP68]                       | 2.20E-39  | 28         | 77                | AAO83891.1 |
| 5   | 17107      | 18930    | 607       |                          | ORF57 [bacteriophage phi ETA]                                           | 0         | 78         | 100               | BAA97643.1 |
| 74  | 18404      | 18625    | 73        |                          |                                                                         |           |            |                   |            |
| 38  | 18930      | 19307    | 125       |                          | ORF58 [bacteriophage phi ETA]                                           | 3.20E-62  | 94         | 100               | BAA97644.1 |
| 104 | 19308      | 19484    | 58        |                          | ORF59 [bacteriophage phi ETA]                                           | 5.00E-26  | 93         | 98                | BAA97645.1 |
| 52  | 19525      | 19824    | 99        |                          | 77ORF058 [Bacteriophage 77]                                             | 3.90E-32  | 86         | 76                | AAR87920.1 |
| 4   | 19961      | 21835    | 624       | Amidase                  | cell wall hydrolase [S. aureus phage phi 11]                            | 0         | 58         | 100               | AAL82277.1 |
| 10  | 21848      | 23020    | 390       | Tail fiber               | tail fiber [S. aureus phage phi 11]                                     | 0         | 98         | 100               | AAL82278.1 |
| 33  | 23026      | 23421    | 131       |                          | ORF63 [bacteriophage phi ETA]                                           | 2.60E-69  | 96         | 100               | BAA97649.1 |

Bacteriophage 96 (continued)

| ORF | Start (nt) | End (nt) | Size (aa) | Predicted Function               | Representative similarity to proteins in database                   | E-value   | % Identity | % Length of Match | Accession  |
|-----|------------|----------|-----------|----------------------------------|---------------------------------------------------------------------|-----------|------------|-------------------|------------|
| 50  | 23477      | 23779    | 100       | Holin                            | holin [S. aureus bacteriophage PVL]                                 | 1.70E-51  | 100        | 100               | BAA31897.1 |
| 6   | 23790      | 25244    | 484       | Amidase                          | amidase [S. aureus subsp. aureus MSSA476]                           | 0         | 99         | 100               | CAG42730.1 |
| 186 | 25521      | 25420    | 33        |                                  |                                                                     |           |            |                   |            |
| 59  | 25992      | 26198    | 68        |                                  | unknown [S. aureus subsp. aureus MRSA252]                           | 6.70E-20  | 68         | 95                | CAG40141.1 |
| 89  | 26213      | 26413    | 66        |                                  |                                                                     |           |            |                   |            |
| 11  | 27945      | 26896    | 349       | Integrase                        | integrase [S. aureus subsp. aureus MSSA476]                         | 1.10E-54  | 35         | 95                | CAG43729.1 |
| 25  | 28509      | 28006    | 167       |                                  | putative lipoprotein [S. aureus subsp. aureus MRSA252]              | 9.70E-14  | 36         | 88                | CAG40557.1 |
| 26  | 29004      | 28513    | 163       |                                  |                                                                     |           |            |                   |            |
| 28  | 29483      | 29025    | 152       |                                  | unknown [S. aureus subsp. aureus MRSA252]                           | 4.80E-85  | 100        | 100               | CAG40556.1 |
| 47  | 29831      | 29505    | 108       | Repressor                        | putative phage regulatory protein [S. aureus subsp. aureus MSSA476] | 2.40E-34  | 63         | 100               | CAG42672.1 |
| 85  | 29994      | 30203    | 69        | Repressor                        | putative phage regulatory protein [S. aureus subsp. aureus MSSA476] | 1.60E-10  | 51         | 94                | CAG42673.1 |
| 16  | 30242      | 30967    | 241       | Antirepressor                    | anti-repressor [S. aureus phage phi 11]                             | 2.20E-52  | 57         | 85                | AAL82235.1 |
| 86  | 30992      | 31201    | 69        |                                  |                                                                     |           |            |                   |            |
| 92  | 31215      | 31376    | 53        |                                  | putative exported protein [S. aureus subsp. aureus MSSA476]         | 1.50E-22  | 94         | 100               | CAG43717.1 |
| 45  | 31469      | 31798    | 109       |                                  |                                                                     |           |            |                   |            |
| 48  | 31779      | 32039    | 86        |                                  | orf 39 [S. aureus bacteriophage PVL]                                | 9.90E-26  | 62         | 100               | BAA31913.1 |
| 22  | 32052      | 32588    | 178       | Chromosome segregation           | chromosome segregation SMC protein [OceanoB. iheyensis HTE831]      | 3.30E-05  | 24         | 84                | BAC13484.1 |
| 14  | 32589      | 33368    | 259       |                                  | ORF17 [bacteriophage phi ETA]                                       | 2.00E-144 | 99         | 100               | BAA97603.1 |
| 21  | 33398      | 33952    | 184       | ssDNA-binding                    | ssb [S. aureus phage phi 11]                                        | 7.00E-105 | 100        | 100               | AAL82241.1 |
| 18  | 33965      | 34636    | 223       |                                  | ORF20 [bacteriophage phi ETA]                                       | 2.00E-127 | 98         | 100               | BAA97606.1 |
| 15  | 34629      | 35384    | 251       | DnaD and phage-associated domain | unknown [B. cereus ZK]                                              | 4.20E-36  | 51         | 62                | AAU16814.1 |
| 42  | 35384      | 35740    | 118       |                                  |                                                                     |           |            |                   |            |
| 8   | 35737      | 36978    | 413       | DnaB-like helicase               | helicase DnaB [S. aureus phage phi 11]                              | 0         | 99         | 100               | AAL82244.1 |
| 78  | 36975      | 37190    | 71        |                                  |                                                                     |           |            |                   |            |
| 73  | 37194      | 37415    | 73        |                                  | ORF24 [bacteriophage phi ETA]                                       | 1.30E-36  | 100        | 100               | BAA97610.1 |
| 32  | 37426      | 37830    | 134       |                                  | ORF25 [bacteriophage phi ETA]                                       | 7.10E-75  | 99         | 100               | BAA97611.1 |
| 100 | 37835      | 38020    | 61        |                                  | orf 23 [S. aureus prophage phiPV83]                                 | 1.10E-25  | 92         | 100               | BAA97830.1 |
| 61  | 38021      | 38278    | 85        | Repressor                        | HTH DNA-binding protein [S. aureus phage phi 11]                    | 8.40E-41  | 100        | 96                | AAL82248.1 |
| 40  | 38290      | 38649    | 119       | DNA-binding                      | putative DNA-binding protein [S. aureus subsp. aureus MSSA476]      | 1.10E-12  | 37         | 100               | CAG42686.1 |
| 60  | 38649      | 38906    | 85        |                                  | unknown [S. aureus subsp. aureus MSSA476]                           | 2.60E-42  | 98         | 98                | CAG42687.1 |
| 80  | 38909      | 39109    | 66        |                                  | unknown [S. aureus subsp. aureus MRSA252]                           | 2.70E-29  | 94         | 100               | CAG40536.1 |
| 64  | 39124      | 39366    | 80        |                                  | unknown [S. aureus subsp. aureus MRSA252]                           | 1.60E-39  | 94         | 100               | CAG40535.1 |

Bacteriophage 96 (continued)

| ORF | Start (nt) | End (nt) | Size (aa) | Predicted Function             | Representative similarity to proteins in database      | E-value  | % Identity | % Length of Match | Accession  |
|-----|------------|----------|-----------|--------------------------------|--------------------------------------------------------|----------|------------|-------------------|------------|
| 35  | 39381      | 39773    | 130       |                                | unknown [S. aureus subsp. aureus MRSA252]              | 1.70E-71 | 100        | 100               | CAG40534.1 |
| 94  | 39770      | 39961    | 63        |                                | unknown [S. aureus subsp. aureus MRSA252]              | 5.60E-30 | 100        | 100               | CAG40533.1 |
| 30  | 39961      | 40392    | 143       |                                | unknown [S. aureus subsp. aureus MRSA252]              | 5.00E-78 | 99         | 100               | CAG40532.1 |
| 65  | 40385      | 40636    | 83        |                                | unknown [S. aureus subsp. aureus MRSA252]              | 7.90E-39 | 94         | 100               | CAG41059.1 |
| 93  | 40626      | 40799    | 57        |                                | unknown [S. aureus subsp. aureus MW2]                  | 8.50E-26 | 100        | 100               | BAB95283.1 |
| 55  | 40800      | 41081    | 93        |                                | unknown [S. aureus subsp. aureus MW2]                  | 6.20E-49 | 98         | 100               | BAB95282.1 |
| 114 | 41082      | 41243    | 53        |                                | unknown [S. aureus subsp. aureus MW2]                  | 2.80E-24 | 98         | 100               | BAB95281.1 |
| 23  | 41258      | 41791    | 177       |                                | unknown [S. aureus subsp. aureus MW2]                  | 6.20E-97 | 98         | 100               | BAB95280.1 |
| 97  | 41828      | 42016    | 62        |                                | orf 55 [S. aureus bacteriophage PVL]                   | 2.20E-26 | 90         | 100               | BAA31928.1 |
| 217 | 41877      | 41978    | 33        |                                |                                                        |          |            |                   |            |
| 79  | 41991      | 42200    | 69        |                                | orf 56 [S. aureus bacteriophage PVL]                   | 8.70E-28 | 98         | 91                | BAA31929.1 |
| 62  | 42197      | 42433    | 78        |                                | unknown [S. aureus subsp. aureus Mu50]                 | 8.10E-39 | 97         | 100               | BAB57042.1 |
| 24  | 42367      | 41861    | 168       |                                |                                                        |          |            |                   |            |
| 37  | 42423      | 42809    | 128       |                                | unknown [S. aureus subsp. aureus Mu50]                 | 1.50E-67 | 99         | 100               | BAB57043.1 |
| 105 | 42809      | 42982    | 57        | Transcriptional activator RinB | int gene activator RinB [S. aureus subsp. aureus Mu50] | 2.70E-24 | 98         | 100               | BAB57044.1 |
| 36  | 42983      | 43384    | 133       |                                | ORF38 [bacteriophage phi ETA]                          | 3.60E-71 | 100        | 100               | BAA97624.1 |

## Bacteriophage ROSA

| ORF | Start (nt) | End (nt) | Size (aa) | Predicted Function                        | Representative similarity to proteins in database                       | E-value   | % Identity | % Length of Match | Accession  |
|-----|------------|----------|-----------|-------------------------------------------|-------------------------------------------------------------------------|-----------|------------|-------------------|------------|
| 34  | 140        | 520      | 126       |                                           | unknown[S. pyogenes phage 315.5]                                        | 4.90E-10  | 39         | 73                | AAM79936.1 |
| 8   | 504        | 1769     | 421       | Large terminase                           | putative large terminase [S. pyogenes phage 315.5]                      | 3.00E-115 | 74         | 61                | AAM79934.1 |
| 7   | 1770       | 3194     | 474       | Portal                                    | portal protein [Bacteriophage SPP1]                                     | 3.70E-65  | 34         | 100               | CAA39541.1 |
| 11  | 3151       | 4110     | 319       | Head morphogenesis                        | ORF42 (product required for head morphogenesis) [bacteriophage phi ETA] | 3.00E-156 | 87         | 98                | BAA97628.1 |
| 20  | 4223       | 4822     | 199       | Minor capsid                              | minor capsid protein [Bacteriophage phig1e]                             | 1.30E-17  | 29         | 100               | CAA66737.1 |
| 13  | 4844       | 5668     | 274       | Major capsid                              | major capsid protein [temperate phage PhiNIH1.1]                        | 1.10E-61  | 49         | 97                | AAL15075.1 |
| 44  | 5685       | 6011     | 108       | Rho termination factor, N-terminal domain | ORF45 [bacteriophage phi ETA]                                           | 2.10E-51  | 94         | 100               | BAA97631.1 |
| 47  | 6011       | 6325     | 104       | Head morphogenesis                        | ORF46 (product required for head morphogenesis) [bacteriophage phi ETA] | 7.90E-54  | 97         | 100               | BAA97632.1 |
| 43  | 6318       | 6653     | 111       | Head-tail adaptor                         | ORF47 [bacteriophage phi ETA]                                           | 5.00E-37  | 63         | 99                | BAA97633.1 |
| 49  | 6604       | 6906     | 100       |                                           | ORF48 [bacteriophage phi ETA]                                           | 3.10E-13  | 55         | 56                | BAA97634.1 |
| 19  | 6991       | 7650     | 219       | Early protein                             | possible Early Protein (E6) [Prochlorococcus marinus str. MIT 9313]     | 3.90E-05  | 31         | 53                | CAE20971.1 |
| 27  | 8036       | 8461     | 141       |                                           | ORF49 [bacteriophage phi ETA]                                           | 3.50E-39  | 58         | 99                | BAA97635.1 |
| 21  | 8462       | 9019     | 185       |                                           | ORF50 [bacteriophage phi ETA]                                           | 1.30E-42  | 50         | 98                | BAA97636.1 |
| 36  | 9086       | 9592     | 168       |                                           | ORF51 [bacteriophage phi ETA]                                           | 7.00E-44  | 56         | 98                | BAA97637.1 |
| 124 | 9772       | 9921     | 49        |                                           |                                                                         |           |            |                   |            |
| 1   | 9925       | 13068    | 1047      | Tape measure protein                      | tape measure protein [S. aureus phage phi 11]                           | 1.00E-162 | 37         | 87                | AAL82270.1 |
| 39  | 13083      | 14024    | 313       |                                           | ORF54 [bacteriophage phi ETA]                                           | 7.00E-146 | 78         | 100               | BAA97640.1 |
| 3   | 14035      | 15921    | 628       | Endopeptidase                             | phage endopeptidase [S. pyogenes MGAS10394]                             | 4.40E-24  | 25         | 48                | AAT86193.1 |
| 2   | 15934      | 17832    | 632       | Minor structural protein                  | minor structural protein [S. aureus phage phiP68]                       | 2.40E-38  | 27         | 76                | AAO83891.1 |
| 5   | 17832      | 19655    | 607       |                                           | ORF57 [bacteriophage phi ETA]                                           | 0         | 78         | 100               | BAA97643.1 |
| 32  | 19655      | 20032    | 125       |                                           | ORF58 [bacteriophage phi ETA]                                           | 1.10E-62  | 94         | 100               | BAA97644.1 |
| 103 | 20033      | 20209    | 58        |                                           | ORF59 [bacteriophage phi ETA]                                           | 5.00E-26  | 93         | 98                | BAA97645.1 |
| 51  | 20250      | 20549    | 99        |                                           | unknown [S. aureus temperate phage phiSLT]                              | 3.30E-31  | 63         | 100               | BAB21751.1 |
| 4   | 20686      | 22560    | 624       | Amidase                                   | cell wall hydrolase [S. aureus phage phi 11]                            | 0         | 58         | 100               | AAL82277.1 |
| 10  | 22573      | 23745    | 390       | Tail                                      | tail fiber [S. aureus phage phi 11]                                     | 0         | 99         | 100               | AAL82278.1 |
| 31  | 23751      | 24146    | 131       |                                           | ORF63 [bacteriophage phi ETA]                                           | 9.10E-70  | 97         | 100               | BAA97649.1 |
| 50  | 24202      | 24504    | 100       | Holin                                     | holin [S. aureus temperate phage phiSLT]                                | 4.90E-51  | 100        | 100               | BAB21752.1 |
| 6   | 24516      | 25970    | 484       | Amidase                                   | amidase [S. aureus subsp. aureus MRSA252]                               | 0         | 100        | 100               | CAG40495.1 |
| 198 | 25630      | 25743    | 37        |                                           |                                                                         |           |            |                   |            |
| 9   | 28020      | 26815    | 401       | Integrase                                 | phage integrase [S. aureus subsp. aureus MSSA476]                       | 0         | 85         | 100               | CAG42666.1 |



Bacteriophage ROSA (continued)

| ORF | Start (nt) | End (nt) | Size (aa) | Predicted Function           | Representative similarity to proteins in database                        | E-value   | % Identity | % Length of Match | Accession  |
|-----|------------|----------|-----------|------------------------------|--------------------------------------------------------------------------|-----------|------------|-------------------|------------|
| 98  | 28131      | 28310    | 59        | Excisionase                  | excisionase [S. aureus subsp. aureus Mu50]                               | 3.80E-26  | 97         | 100               | BAB57010.1 |
| 207 | 28432      | 28325    | 35        |                              | unknown [S. aureus]                                                      | 1.80E-05  | 77         | 85                | AAL04145.1 |
| 25  | 28927      | 28436    | 163       |                              |                                                                          |           |            |                   |            |
| 26  | 29409      | 28948    | 153       |                              | unknown [S. aureus temperate phage phiSLT]                               | 3.50E-83  | 97         | 100               | BAB21699.1 |
| 46  | 29745      | 29422    | 107       | Repressor                    | phage repressor [S. aureus subsp. aureus MW2]                            | 3.90E-53  | 97         | 100               | BAB95301.1 |
| 63  | 29909      | 30157    | 82        | Repressor                    | putative Cro-like repressor - phage associated [S. pyogenes phage 315.5] | 7.00E-11  | 52         | 79                | AAM79956.1 |
| 114 | 30172      | 30333    | 53        |                              |                                                                          |           |            |                   |            |
| 42  | 30571      | 30326    | 81        |                              |                                                                          |           |            |                   |            |
| 17  | 30627      | 31379    | 250       | Antirepressor                | putative anti repressor [S. aureus subsp. aureus MRSA252]                | 7.00E-124 | 91         | 100               | CAG41079.1 |
| 74  | 31395      | 31613    | 72        |                              | orf 10 [S. aureus prophage phiPV83]                                      | 4.10E-06  | 86         | 38                | BAA97817.1 |
| 58  | 31643      | 31906    | 87        | DNA-binding                  | putative DNA-binding protein [S. aureus subsp. aureus MSSA476]           | 1.20E-47  | 100        | 100               | CAG42677.1 |
| 115 | 31918      | 32079    | 53        |                              | putative exported protein [S. aureus subsp. aureus MSSA476]              | 1.70E-21  | 91         | 100               | CAG43717.1 |
| 193 | 32048      | 31938    | 36        |                              |                                                                          |           |            |                   |            |
| 53  | 32171      | 32431    | 86        |                              | orf 39 [S. aureus bacteriophage PVL]                                     | 2.50E-45  | 100        | 100               | BAA31913.1 |
| 72  | 32441      | 32662    | 73        |                              | unknown [S. aureus subsp. aureus Mu50]                                   | 5.90E-37  | 100        | 100               | BAB57024.1 |
| 14  | 32655      | 33443    | 262       |                              | ORF17 [bacteriophage phi ETA]                                            | 1.70E-99  | 67         | 98                | BAA97603.1 |
| 22  | 33472      | 34023    | 183       | ssDNA-binding                | ssb [S. aureus phage phi 11]                                             | 1.50E-61  | 63         | 100               | AAL82241.1 |
| 168 | 33654      | 33535    | 39        |                              |                                                                          |           |            |                   |            |
| 80  | 33812      | 34015    | 67        |                              | ORF19 [bacteriophage phi ETA]                                            | 1.10E-30  | 99         | 100               | BAA97605.1 |
| 91  | 34036      | 34224    | 62        |                              | ORF20 [bacteriophage phi ETA]                                            | 5.60E-22  | 100        | 79                | BAA97606.1 |
| 24  | 34217      | 34708    | 163       |                              | ORF20 [bacteriophage phi ETA]                                            | 4.40E-93  | 98         | 100               | BAA97606.1 |
| 171 | 34705      | 34821    | 38        |                              | 77ORF151 [Bacteriophage 77]                                              | 6.80E-13  | 100        | 100               | AAR87940.1 |
| 12  | 35671      | 34814    | 285       |                              | unknown [S. pyogenes MGAS10394]                                          | 4.20E-22  | 36         | 58                | AAT86873.1 |
| 16  | 35736      | 36506    | 256       | DNA replication              | DnaA analog [Bacteriophage LL-H]                                         | 3.80E-40  | 38         | 100               | AAL77546.1 |
| 15  | 36516      | 37295    | 259       | DNA replication protein DnaC | dnaC [S. aureus phage phi 13]                                            | 6.00E-150 | 99         | 100               | AAL82346.1 |
| 117 | 37289      | 37447    | 52        |                              | unknown [S. aureus subsp. aureus Mu50]                                   | 2.20E-21  | 90         | 100               | BAB57032.1 |
| 68  | 37460      | 37681    | 73        |                              | ORF24 [bacteriophage phi ETA]                                            | 5.00E-36  | 99         | 100               | BAA97610.1 |
| 30  | 37691      | 38098    | 135       | Endodeoxyribonuclease RusA   | orf 48 [S. aureus bacteriophage PVL]                                     | 2.40E-67  | 88         | 99                | BAA31922.1 |
| 95  | 38098      | 38283    | 61        |                              | ORF26 [bacteriophage phi ETA]                                            | 5.80E-27  | 93         | 100               | BAA97612.1 |
| 38  | 38284      | 38643    | 119       | DNA-binding                  | putative DNA-binding protein [S. aureus subsp. aureus MSSA476]           | 1.20E-11  | 37         | 100               | CAG42686.1 |
| 62  | 38643      | 38897    | 84        |                              | unknown [S. aureus subsp. aureus MRSA252]                                | 3.10E-43  | 99         | 100               | CAG40537.1 |
| 61  | 38897      | 39145    | 82        |                              | unknown [S. aureus subsp. aureus N315]                                   | 3.20E-40  | 94         | 100               | BAB43064.1 |
| 29  | 39160      | 39564    | 134       |                              | unknown [S. aureus subsp. aureus MSSA476]                                | 2.80E-71  | 97         | 99                | CAG42690.1 |

Bacteriophage ROSA (continued)

| ORF | Start (nt) | End (nt) | Size (aa) | Predicted Function             | Representative similarity to proteins in database               | E-value  | % Identity | % Length of Match | Accession  |
|-----|------------|----------|-----------|--------------------------------|-----------------------------------------------------------------|----------|------------|-------------------|------------|
| 41  | 39561      | 39908    | 115       | Sensor                         | possible sensor protein [S. aureus phage phi 13]                | 2.80E-56 | 93         | 100               | AAL82351.1 |
| 48  | 39905      | 40213    | 102       |                                | unknown [S. aureus subsp. aureus MSSA476]                       | 8.90E-53 | 97         | 100               | CAG42692.1 |
| 59  | 40206      | 40460    | 84        |                                | orf 52 [S. aureus bacteriophage PVL]                            | 1.10E-37 | 94         | 97                | BAA31925.1 |
| 92  | 40447      | 40617    | 56        |                                |                                                                 |          |            |                   |            |
| 23  | 40610      | 41140    | 176       | dUTPase                        | putative dUTP pyrophosphatase [S. aureus subsp. aureus MRSA252] | 9.10E-85 | 87         | 100               | CAG41057.1 |
| 54  | 41177      | 41464    | 95        |                                | unknown [S. aureus subsp. aureus MRSA252]                       | 4.30E-18 | 75         | 58                | CAG40528.1 |
| 33  | 41457      | 41843    | 128       |                                | orf31 [S. aureus prophage phiPV83]                              | 2.20E-63 | 92         | 99                | BAA97838.1 |
| 105 | 41840      | 42013    | 57        | Transcriptional activator RinB | rinB [S. aureus phage phi 11]                                   | 1.00E-23 | 95         | 100               | AAL82255.1 |
| 37  | 42014      | 42379    | 121       |                                |                                                                 |          |            |                   |            |
| 128 | 42380      | 42526    | 48        |                                | unknown [S. aureus subsp. aureus Mu50]                          | 6.30E-08 | 96         | 58                | BAB57045.1 |
| 28  | 42550      | 42972    | 140       | Transcriptional activator RinA | rinA [S. aureus phage phi 11]                                   | 1.20E-71 | 94         | 99                | AAL82256.1 |

## Bacteriophage 71

| ORF | Start (nt) | End (nt) | Size (aa) | Predicted Function                 | Representative similarity to proteins in database                       | E-value   | % Identity | % Length of Match | Accession  |
|-----|------------|----------|-----------|------------------------------------|-------------------------------------------------------------------------|-----------|------------|-------------------|------------|
| 41  | 66         | 446      | 126       |                                    | unknown [S. pyogenes SSI-1]                                             | 4.90E-10  | 39         | 73                | BAC63628.1 |
| 8   | 430        | 1695     | 421       | Large terminase                    | putative large terminase [Bacteriophage A118]                           | 4.70E-45  | 31         | 100               | CAB53788.1 |
| 6   | 1696       | 3120     | 474       | Portal                             | portal protein [Bacteriophage SPP1]                                     | 3.70E-65  | 34         | 100               | CAA39541.1 |
| 12  | 3077       | 4036     | 319       | Head morphogenesis; Minor head     | ORF42 (product required for head morphogenesis) [bacteriophage phi ETA] | 8.00E-156 | 87         | 98                | BAA97628.1 |
|     |            |          |           |                                    | phage related minor head protein [B. subtilis phage PBSX]               | 3.40E-63  | 43         | 95                | AAU23011.1 |
| 20  | 4149       | 4748     | 199       | Minor capsid                       | minor capsid protein [Bacteriophage phig1e]                             | 1.30E-17  | 29         | 100               | CAA66737.1 |
| 14  | 4770       | 5594     | 274       | Major capsid                       | major capsid protein [temperate phage PhiNIH1.1]                        | 1.10E-61  | 49         | 97                | AAL15075.1 |
| 50  | 5611       | 5937     | 108       | Rho termination factor, N-terminal | ORF45 [bacteriophage phi ETA]                                           | 2.10E-51  | 94         | 100               | BAA97631.1 |
| 51  | 5937       | 6251     | 104       | Head morphogenesis                 | ORF46 (product required for head morphogenesis) [bacteriophage phi ETA] | 7.90E-54  | 97         | 100               | BAA97632.1 |
| 49  | 6244       | 6579     | 111       | Head-tail adaptor                  | ORF47 [bacteriophage phi ETA]                                           | 9.40E-60  | 97         | 100               | BAA97633.1 |
| 46  | 6566       | 6979     | 137       | Major tail                         | putative major tail protein [LactoB. johnsonii prophage Lj928]          | 3.40E-05  | 32         | 59                | AAR27382.1 |
| 97  | 6765       | 6941     | 58        |                                    |                                                                         |           |            |                   |            |
| 32  | 6992       | 7429     | 145       | Inorganic pyrophosphatase          | ORF49 [bacteriophage phi ETA]                                           | 3.80E-78  | 99         | 100               | BAA97635.1 |
| 23  | 7416       | 7976     | 186       |                                    | ORF50 [bacteriophage phi ETA]                                           | 5.00E-103 | 100        | 100               | BAA97636.1 |
| 28  | 8038       | 8532     | 164       |                                    | ORF51 [bacteriophage phi ETA]                                           | 1.00E-89  | 100        | 100               | BAA97637.1 |
| 48  | 8553       | 8894     | 113       |                                    | ORF52 [bacteriophage phi ETA]                                           | 1.60E-59  | 98         | 100               | BAA97638.1 |
| 1   | 8897       | 11866    | 989       | Tape measure protein               | tape measure protein [S. aureus phage phi 11]                           | 2.00E-165 | 37         | 93                | AAL82270.1 |
| 13  | 11881      | 12816    | 311       |                                    | ORF54 [bacteriophage phi ETA]                                           | 1.00E-177 | 97         | 100               | BAA97640.1 |
| 3   | 12827      | 14713    | 628       | Endopeptidase                      | phage endopeptidase [S. pyogenes MGAS10394]                             | 7.10E-22  | 25         | 46                | AAT86193.1 |
| 2   | 14726      | 16624    | 632       | Minor structural protein           | minor structural protein [S. aureus phage phiP68]                       | 1.40E-38  | 27         | 76                | AAO83891.1 |
| 5   | 16624      | 18447    | 607       |                                    | ORF57 [bacteriophage phi ETA]                                           | 0         | 82         | 100               | BAA97643.1 |
| 40  | 18447      | 18824    | 125       |                                    | ORF58 [bacteriophage phi ETA]                                           | 2.60E-64  | 98         | 100               | BAA97644.1 |
| 96  | 18824      | 19000    | 58        |                                    | ORF59 [bacteriophage phi ETA]                                           | 1.10E-28  | 100        | 98                | BAA97645.1 |
| 53  | 19041      | 19340    | 99        |                                    | unknown [S. aureus temperate phage phiSLT]                              | 6.70E-48  | 93         | 100               | BAB21751.1 |
| 4   | 19477      | 21351    | 624       | Amidase                            | cell wall hydrolase [S. aureus phage phi 11]                            | 0         | 58         | 100               | AAL82277.1 |
| 10  | 21364      | 22536    | 390       | Tail fiber                         | tail fiber [S. aureus phage phi 11]                                     | 0         | 99         | 100               | AAL82278.1 |
| 36  | 22542      | 22937    | 131       |                                    | ORF63 [bacteriophage phi ETA]                                           | 9.10E-70  | 97         | 100               | BAA97649.1 |
| 56  | 22992      | 23267    | 91        | Holin                              | holin [bacteriophage bIL285]                                            | 4.10E-16  | 49         | 79                | AAK08286.1 |
| 7   | 23254      | 24666    | 470       | Amidase                            | amidase [S. aureus subsp. aureus MSSA476]                               | 4.70E-89  | 49         | 78                | CAG42730.1 |
| 24  | 25284      | 24727    | 185       | Beta-lactamase                     | probable beta-lactamase [S. aureus subsp. aureus Mu50]                  | 1.60E-26  | 41         | 100               | BAB57977.1 |
| 21  | 25804      | 26391    | 195       |                                    |                                                                         |           |            |                   |            |

Bacteriophage 71 (continued)

| ORF | Start (nt) | End (nt) | Size (aa) | Predicted Function                                    | Representative similarity to proteins in database                   | E-value   | % Identity | % Length of Match | Accession  |
|-----|------------|----------|-----------|-------------------------------------------------------|---------------------------------------------------------------------|-----------|------------|-------------------|------------|
| 31  | 26388      | 26843    | 151       |                                                       |                                                                     |           |            |                   |            |
| 11  | 28216      | 27167    | 349       | Integrase                                             | integrase [S. aureus subsp. aureus Mu50]                            | 0         | 100        | 100               | BAB57009.1 |
| 42  | 28645      | 28274    | 123       |                                                       | ORF2 [bacteriophage phi ETA]                                        | 1.10E-65  | 100        | 100               | BAA97588.1 |
| 33  | 29060      | 28635    | 141       |                                                       | ORF3 [bacteriophage phi ETA]                                        | 2.80E-76  | 99         | 100               | BAA97589.1 |
| 30  | 29539      | 29078    | 153       |                                                       | unknown [S. aureus temperate phage phiSLT]                          | 1.20E-83  | 99         | 100               | BAB21699.1 |
| 67  | 30018      | 30254    | 78        |                                                       |                                                                     |           |            |                   |            |
| 22  | 30124      | 29552    | 190       | Repressor                                             | repressor [S. aureus temperate phage phiSLT]                        | 9.00E-55  | 100        | 54                | BAB21700.1 |
| 92  | 30268      | 30447    | 59        |                                                       | ORF8 [bacteriophage phi ETA]                                        | 8.50E-26  | 95         | 100               | BAA97594.1 |
| 29  | 31030      | 30548    | 160       |                                                       | ORF9 [bacteriophage phi ETA]                                        | 5.00E-86  | 100        | 100               | BAA97595.1 |
| 17  | 31090      | 31839    | 249       | Antirepressor                                         | anti repressor [S. aureus bacteriophage PVL]                        | 8.00E-138 | 99         | 100               | BAA31909.1 |
| 132 | 31855      | 31998    | 47        |                                                       | unknown [S. aureus subsp. aureus Mu50]                              | 8.00E-19  | 100        | 100               | BAB57019.1 |
| 72  | 32194      | 32406    | 70        |                                                       |                                                                     |           |            |                   |            |
| 19  | 32661      | 32008    | 217       |                                                       | ORF12 [bacteriophage phi ETA]                                       | 3.60E-56  | 54         | 99                | BAA97598.1 |
| 74  | 32732      | 32953    | 73        | Transcriptional regulator                             | orf 12 [S. aureus prophage phiPV83]                                 | 1.70E-31  | 95         | 100               | BAA97819.1 |
| 105 | 32946      | 33107    | 53        |                                                       | putative exported protein [S. aureus subsp. aureus MRSA252]         | 6.20E-24  | 100        | 100               | CAG41074.1 |
| 195 | 33076      | 32966    | 36        |                                                       |                                                                     |           |            |                   |            |
| 54  | 33200      | 33460    | 86        |                                                       | ORF15 [bacteriophage phi ETA]                                       | 4.30E-45  | 99         | 100               | BAA97601.1 |
| 75  | 33470      | 33691    | 73        |                                                       | unknown [S. aureus subsp. aureus Mu50]                              | 2.00E-21  | 63         | 100               | BAB57024.1 |
| 16  | 33684      | 34472    | 262       |                                                       | ORF17 [bacteriophage phi ETA]                                       | 3.00E-100 | 67         | 98                | BAA97603.1 |
| 25  | 34501      | 35052    | 183       | ssDNA-binding                                         | ssb [S. aureus phage phi 11]                                        | 1.50E-61  | 63         | 100               | AAL82241.1 |
| 174 | 34683      | 34564    | 39        |                                                       |                                                                     |           |            |                   |            |
| 81  | 34841      | 35044    | 67        |                                                       | ORF19 [bacteriophage phi ETA]                                       | 1.10E-30  | 99         | 100               | BAA97605.1 |
| 18  | 35065      | 35757    | 230       |                                                       | ORF20 [bacteriophage phi ETA]                                       | 6.00E-126 | 97         | 96                | BAA97606.1 |
| 15  | 35729      | 36526    | 265       | DnaD and phage-associated domain; Replisome organizer | putative phage regulatory protein [S. aureus subsp. aureus MSSA476] | 7.00E-05  | 21         | 69                | CAG43710.1 |
| 43  | 36526      | 36882    | 118       |                                                       |                                                                     |           |            |                   |            |
| 9   | 36879      | 38120    | 413       | DnaB-like helicase                                    | helicase DnaB [S. aureus phage phi 11]                              | 0         | 99         | 100               | AAL82244.1 |
| 78  | 38117      | 38332    | 71        |                                                       |                                                                     |           |            |                   |            |
| 69  | 38335      | 38556    | 73        |                                                       | ORF24 [bacteriophage phi ETA]                                       | 5.00E-36  | 99         | 100               | BAA97610.1 |
| 35  | 38567      | 38971    | 134       |                                                       | ORF25 [bacteriophage phi ETA]                                       | 4.60E-74  | 98         | 100               | BAA97611.1 |
| 90  | 38976      | 39161    | 61        |                                                       | orf 23 [S. aureus prophage phiPV83]                                 | 2.40E-25  | 90         | 100               | BAA97830.1 |
| 44  | 39162      | 39518    | 118       |                                                       | unknown [S. aureus subsp. aureus MRSA252]                           | 4.00E-39  | 65         | 98                | CAG41062.1 |
| 65  | 39522      | 39764    | 80        |                                                       | orf 51 [S. aureus bacteriophage PVL]                                | 6.60E-41  | 96         | 100               | BAA31924.1 |
| 34  | 39778      | 40182    | 134       |                                                       | unknown [S. aureus subsp. aureus MSSA476]                           | 5.10E-49  | 66         | 100               | CAG42690.1 |

Bacteriophage 71 (continued)

| ORF | Start (nt) | End (nt) | Size (aa) | Predicted Function             | Representative similarity to proteins in database | E-value  | % Identity | % Length of Match | Accession  |
|-----|------------|----------|-----------|--------------------------------|---------------------------------------------------|----------|------------|-------------------|------------|
| 57  | 40182      | 40457    | 91        |                                | unknown [S. aureus subsp. aureus MSSA476]         | 2.20E-30 | 85         | 80                | CAG42692.1 |
| 62  | 40450      | 40704    | 84        |                                | unknown [S. aureus subsp. aureus MW2]             | 4.60E-39 | 96         | 97                | BAB95284.1 |
| 88  | 40691      | 40861    | 56        |                                |                                                   |          |            |                   |            |
| 26  | 40854      | 41363    | 169       | dUTPase                        | dUTPase [S. aureus phage phi 11]                  | 4.20E-89 | 97         | 100               | AAL82253.1 |
| 64  | 41400      | 41645    | 81        |                                | orf 54 [S. aureus bacteriophage PVL]              | 8.50E-33 | 88         | 96                | BAA31927.1 |
| 118 | 41642      | 41794    | 50        |                                | ORF35 [bacteriophage phi ETA]                     | 8.80E-18 | 93         | 92                | BAA97621.1 |
| 27  | 41787      | 42245    | 152       |                                |                                                   |          |            |                   |            |
| 144 | 42258      | 42431    | 57        | Transcriptional activator RinB | rinB [S. aureus phage phi 11]                     | 3.70E-21 | 86         | 100               | AAL82255.1 |
| 38  | 42432      | 42833    | 133       |                                | ORF38 [bacteriophage phi ETA]                     | 3.60E-71 | 100        | 100               | BAA97624.1 |

## Bacteriophage 55

| ORF | Start (nt) | End (nt) | Size (aa) | Predicted Function                 | Representative similarity to proteins in database                       | E-value   | % Identity | % Length of Match | Accession  |
|-----|------------|----------|-----------|------------------------------------|-------------------------------------------------------------------------|-----------|------------|-------------------|------------|
| 38  | 266        | 637      | 123       |                                    | ORF39 [bacteriophage phi ETA]                                           | 1.70E-63  | 100        | 100               | BAA97625.1 |
| 9   | 627        | 1838     | 403       | Large terminase                    | putative phage terminase [N. farcinica IFM 10152]                       | 4.00E-38  | 31         | 100               | BAD58781.1 |
| 6   | 1852       | 3270     | 472       | Portal                             | portal protein [Bacteriophage SPP1]                                     | 1.10E-72  | 35         | 100               | CAA39541.1 |
| 11  | 3227       | 4189     | 320       | Head morphogenesis                 | ORF42 (product required for head morphogenesis) [bacteriophage phi ETA] | 0         | 99         | 100               | BAA97628.1 |
| 190 | 4029       | 4136     | 35        |                                    |                                                                         |           |            |                   |            |
| 46  | 4210       | 3941     | 89        |                                    |                                                                         |           |            |                   |            |
| 21  | 4287       | 4883     | 198       | Minor capsid                       | minor capsid protein [Bacteriophage phig1e]                             | 1.70E-19  | 30         | 97                | CAA66737.1 |
| 13  | 4904       | 5728     | 274       | Major capsid                       | major capsid protein [temperate phage PhiNIH1.1]                        | 9.60E-61  | 49         | 97                | AAL15075.1 |
| 45  | 5745       | 6071     | 108       | Rho termination factor, N-terminal | ORF45 [bacteriophage phi ETA]                                           | 5.10E-53  | 96         | 100               | BAA97631.1 |
| 47  | 6071       | 6385     | 104       | Head morphogenesis                 | ORF46 (product required for head morphogenesis) [bacteriophage phi ETA] | 1.20E-54  | 98         | 100               | BAA97632.1 |
| 43  | 6378       | 6713     | 111       | Head-tail adaptor                  | ORF47 [bacteriophage phi ETA]                                           | 1.40E-60  | 98         | 100               | BAA97633.1 |
| 41  | 6700       | 7113     | 137       | Major tail                         | putative major tail protein [LactoB. johnsonii prophage Lj928]          | 2.60E-05  | 32         | 59                | AAR27382.1 |
| 88  | 6899       | 7075     | 58        |                                    |                                                                         |           |            |                   |            |
| 30  | 7126       | 7563     | 145       | Inorganic pyrophosphatase          | ORF49 [bacteriophage phi ETA]                                           | 4.20E-77  | 99         | 100               | BAA97635.1 |
| 22  | 7550       | 8110     | 186       | Major tail                         | ORF50 [bacteriophage phi ETA]                                           | 5.00E-103 | 100        | 100               | BAA97636.1 |
| 26  | 8172       | 8666     | 164       |                                    | ORF51 [bacteriophage phi ETA]                                           | 1.00E-89  | 100        | 100               | BAA97637.1 |
| 42  | 8687       | 9028     | 113       |                                    | ORF52 [bacteriophage phi ETA]                                           | 2.40E-60  | 100        | 100               | BAA97638.1 |
| 1   | 9031       | 12000    | 989       | Tape measure protein               | tape measure protein [S. aureus phage phi 11]                           | 3.00E-165 | 37         | 93                | AAL82270.1 |
| 15  | 11942      | 11139    | 267       |                                    |                                                                         |           |            |                   |            |
| 12  | 12015      | 12950    | 311       |                                    | ORF54 [bacteriophage phi ETA]                                           | 4.00E-180 | 98         | 100               | BAA97640.1 |
| 3   | 12961      | 14844    | 627       | Endopeptidase                      | Phage endopeptidase [S. pyogenes MGAS10394]                             | 1.60E-21  | 25         | 46                | AAT86193.1 |
| 2   | 14857      | 16755    | 632       | Minor structural protein           | minor structural protein [S. aureus phage phiP68]                       | 9.30E-38  | 27         | 77                | AAO83891.1 |
| 5   | 16755      | 18578    | 607       |                                    | ORF57 [bacteriophage phi ETA]                                           | 0         | 88         | 100               | BAA97643.1 |
| 66  | 18052      | 18273    | 73        |                                    |                                                                         |           |            |                   |            |
| 36  | 18578      | 18955    | 125       |                                    | ORF58 [bacteriophage phi ETA]                                           | 5.30E-65  | 99         | 100               | BAA97644.1 |
| 90  | 18959      | 19132    | 57        |                                    | ORF59 [bacteriophage phi ETA]                                           | 1.10E-28  | 100        | 100               | BAA97645.1 |
| 49  | 19172      | 19471    | 99        |                                    | ORF60 [bacteriophage phi ETA]                                           | 1.80E-48  | 93         | 100               | BAA97646.1 |
| 4   | 19608      | 21482    | 624       | Amidase                            | cell wall hydrolase [S. aureus phage phi 11]                            | 0         | 58         | 100               | AAL82277.1 |
| 8   | 21495      | 22733    | 412       | Tail fiber                         | tail fiber [S. aureus subsp. aureus Mu50]                               | 0         | 92         | 100               | BAB57072.1 |
| 92  | 21697      | 21569    | 42        |                                    |                                                                         |           |            |                   |            |
| 35  | 22738      | 23133    | 131       |                                    | ORF63 [bacteriophage phi ETA]                                           | 2.20E-63  | 89         | 100               | BAA97649.1 |

Bacteriophage 55 (continued)

| ORF | Start (nt) | End (nt) | Size (aa) | Predicted Function                | Representative similarity to proteins in database              | E-value   | % Identity | % Length of Match | Accession  |
|-----|------------|----------|-----------|-----------------------------------|----------------------------------------------------------------|-----------|------------|-------------------|------------|
| 31  | 23189      | 23626    | 145       | Holin                             | holin [S. aureus phage phi 11]                                 | 6.00E-76  | 98         | 100               | AAL82280.1 |
| 7   | 23607      | 25052    | 481       | Amidase                           | amidase [S. aureus phage phi 11]                               | 0         | 99         | 100               | AAL82281.1 |
| 171 | 23965      | 24072    | 35        | Amidase                           | amidase [bacteriophage 80 alpha]                               | 8.10E-06  | 79         | 82                | AAB39699.1 |
| 187 | 25518      | 25628    | 36        |                                   | unknown [S. aureus subsp. aureus Mu50]                         | 1.10E-13  | 97         | 100               | BAB57077.1 |
| 73  | 25630      | 25815    | 61        | DNA-binding                       | putative DNA-binding protein [S. aureus subsp. aureus MRSA252] | 3.60E-21  | 79         | 100               | CAG40305.1 |
| 137 | 26040      | 25903    | 45        |                                   |                                                                |           |            |                   |            |
| 48  | 26161      | 26472    | 103       |                                   |                                                                |           |            |                   |            |
| 37  | 26459      | 26842    | 127       |                                   |                                                                |           |            |                   |            |
| 10  | 28231      | 27182    | 349       | Integrase                         | integrase [S. aureus subsp. aureus Mu50]                       | 0         | 99         | 100               | BAB57009.1 |
| 131 | 28745      | 28602    | 47        |                                   |                                                                |           |            |                   |            |
| 25  | 28797      | 28297    | 166       |                                   | putative lipoprotein [S. aureus subsp. aureus MSSA476]         | 4.70E-13  | 33         | 90                | CAG42670.1 |
| 28  | 29276      | 28815    | 153       |                                   | unknown [S. aureus]                                            | 1.60E-67  | 83         | 100               | AAL04144.1 |
| 44  | 29627      | 29298    | 109       | Repressor                         | transcriptional regulator, Cro/Ci family [E. faecalis V583]    | 1.70E-08  | 30         | 100               | AAO81213.1 |
| 54  | 29804      | 30052    | 82        | Cro repressor                     |                                                                |           |            |                   |            |
| 29  | 30065      | 30508    | 147       |                                   | unknown [S. aureus subsp. aureus MRSA252]                      | 4.00E-35  | 51         | 100               | CAG40553.1 |
| 82  | 30859      | 31044    | 61        | Repressor; Helix-turn-helix motif | ORF10 [bacteriophage phi ETA]                                  | 3.40E-27  | 100        | 100               | BAA97596.1 |
| 18  | 31046      | 31801    | 251       | Antirepressor                     | anti repressor [S. aureus subsp. aureus Mu50]                  | 7.00E-140 | 99         | 100               | BAB58156.1 |
| 126 | 31817      | 31960    | 47        |                                   | unknown [S. aureus subsp. aureus Mu50]                         | 8.90E-18  | 96         | 100               | BAB57019.1 |
| 67  | 32156      | 32368    | 70        |                                   |                                                                |           |            |                   |            |
| 20  | 32623      | 31970    | 217       |                                   | ORF12 [bacteriophage phi ETA]                                  | 3.60E-56  | 54         | 99                | BAA97598.1 |
| 68  | 32694      | 32915    | 73        | Transcriptional regulator         | ORF13 [bacteriophage phi ETA]                                  | 8.00E-34  | 100        | 100               | BAA97599.1 |
| 99  | 32908      | 33069    | 53        |                                   | putative exported protein [S. aureus subsp. aureus MRSA252]    | 1.20E-22  | 94         | 100               | CAG41074.1 |
| 56  | 33161      | 33421    | 86        |                                   | orf 39 [S. aureus bacteriophage PVL]                           | 1.20E-44  | 99         | 100               | BAA31913.1 |
| 27  | 33436      | 33915    | 159       |                                   | orf 16 [S. aureus prophage phiPV83]                            | 2.10E-84  | 99         | 100               | BAA97823.1 |
| 17  | 33915      | 34688    | 257       | AAA ATPase                        | ORF17 [bacteriophage phi ETA]                                  | 9.90E-57  | 42         | 100               | BAA97603.1 |
| 24  | 34718      | 35269    | 183       | ssDNA-binding                     | ssb [S. aureus phage phi 11]                                   | 1.20E-61  | 63         | 100               | AAL82241.1 |
| 167 | 34900      | 34781    | 39        |                                   |                                                                |           |            |                   |            |
| 72  | 35058      | 35261    | 67        |                                   | ORF19 [bacteriophage phi ETA]                                  | 1.10E-30  | 99         | 100               | BAA97605.1 |
| 19  | 35282      | 35974    | 230       |                                   | ORF20 [bacteriophage phi ETA]                                  | 2.00E-125 | 97         | 96                | BAA97606.1 |
| 14  | 35946      | 36767    | 273       | Replisome organizer               | putative replisome organizer [L. bacteriophage 4268]           | 5.10E-06  | 22         | 96                | AAM83050.1 |
| 16  | 36780      | 37565    | 261       | DNA replication                   | dnaC [S. aureus phage phi 13]                                  | 7.70E-57  | 45         | 91                | AAL82346.1 |
| 103 | 37562      | 37720    | 52        |                                   | unknown [S. aureus subsp. aureus Mu50]                         | 8.40E-21  | 90         | 100               | BAB57032.1 |
| 64  | 37733      | 37954    | 73        |                                   | unknown [S. aureus temperate phage phiSLT]                     | 3.20E-35  | 96         | 100               | BAB21717.1 |

Bacteriophage 55 (continued)

| ORF | Start (nt) | End (nt) | Size (aa) | Predicted Function             | Representative similarity to proteins in database | E-value  | % Identity | % Length of Match | Accession  |
|-----|------------|----------|-----------|--------------------------------|---------------------------------------------------|----------|------------|-------------------|------------|
| 33  | 37964      | 38368    | 134       |                                | ORF25 [bacteriophage phi ETA]                     | 1.20E-74 | 99         | 100               | BAA97611.1 |
| 83  | 38373      | 38558    | 61        |                                | orf 23 [S. aureus prophage phiPV83]               | 7.90E-24 | 90         | 100               | BAA97830.1 |
| 40  | 38559      | 38927    | 122       |                                | orf 50 [S. aureus bacteriophage PVL]              | 3.10E-60 | 93         | 100               | BAA31923.1 |
| 60  | 38931      | 39173    | 80        |                                | orf 51 [S. aureus bacteriophage PVL]              | 1.40E-38 | 93         | 100               | BAA31924.1 |
| 32  | 39187      | 39591    | 134       |                                | unknown [S. aureus subsp. aureus MSSA476]         | 5.10E-49 | 66         | 100               | CAG42690.1 |
| 52  | 39591      | 39866    | 91        |                                | orf 27 [S. aureus prophage phiPV83]               | 5.00E-30 | 85         | 80                | BAA97834.1 |
| 57  | 39859      | 40107    | 82        |                                | unknown [S. aureus subsp. aureus MRSA252]         | 2.30E-38 | 96         | 100               | CAG40531.1 |
| 23  | 40100      | 40636    | 178       |                                | unknown [S. aureus subsp. aureus MSSA476]         | 9.60E-98 | 99         | 100               | CAG42694.1 |
| 59  | 40673      | 40918    | 81        |                                | orf 54 [S. aureus bacteriophage PVL]              | 8.50E-33 | 88         | 96                | BAA31927.1 |
| 71  | 40915      | 41121    | 68        |                                | ORF35 [bacteriophage phi ETA]                     | 1.40E-30 | 94         | 100               | BAA97621.1 |
| 84  | 41118      | 41291    | 57        | Transcriptional activator RinB | rinB [S. aureus phage phi 11]                     | 6.70E-23 | 93         | 100               | AAL82255.1 |
| 34  | 41292      | 41693    | 133       |                                | ORF38 [bacteriophage phi ETA]                     | 3.60E-71 | 100        | 100               | BAA97624.1 |
| 58  | 41877      | 41623    | 84        |                                |                                                   |          |            |                   |            |



## Bacteriophage 29

| ORF | Start (nt) | End (nt) | Size (aa) | Predicted Function                 | Representative similarity to proteins in database                       | E-value   | % Identity | % Length of Match | Accession  |
|-----|------------|----------|-----------|------------------------------------|-------------------------------------------------------------------------|-----------|------------|-------------------|------------|
| 95  | 385        | 552      | 55        |                                    | ORF39 [bacteriophage phi ETA]                                           | 5.20E-23  | 98         | 100               | BAA97625.1 |
| 9   | 545        | 1753     | 402       | Large terminase                    | ORF40 (putative large subunit terminase) [bacteriophage phi ETA]        | 0         | 100        | 100               | BAA97626.1 |
| 6   | 1707       | 3185     | 492       | Portal                             | ORF41 (portal protein) [bacteriophage phi ETA]                          | 0         | 99         | 98                | BAA97627.1 |
| 13  | 3124       | 4104     | 326       | Head morphogenesis                 | ORF42 (product required for head morphogenesis) [bacteriophage phi ETA] | 8.00E-180 | 98         | 98                | BAA97628.1 |
| 42  | 4125       | 3856     | 89        |                                    |                                                                         |           |            |                   |            |
| 26  | 4202       | 4726     | 174       | Minor capsid                       | ORF43 (minor capsid protein) [bacteriophage phi ETA]                    | 6.50E-72  | 85         | 93                | BAA97629.1 |
| 153 | 4599       | 4721     | 40        |                                    |                                                                         |           |            |                   |            |
| 12  | 4738       | 5697     | 319       |                                    |                                                                         |           |            |                   |            |
| 41  | 5714       | 6040     | 108       | Rho termination factor, N-terminal | unknown [S. pyogenes phage 315.5]                                       | 4.20E-07  | 36         | 95                | AAM79928.1 |
| 43  | 6040       | 6354     | 104       | Head morphogenesis                 | ORF46 (product required for head morphogenesis) [bacteriophage phi ETA] | 1.80E-53  | 95         | 100               | BAA97632.1 |
| 40  | 6347       | 6682     | 111       | Head-tail adaptor                  | ORF47 [bacteriophage phi ETA]                                           | 9.40E-60  | 97         | 100               | BAA97633.1 |
| 50  | 6669       | 7082     | 137       |                                    | ORF48 [bacteriophage phi ETA]                                           | 2.50E-64  | 97         | 84                | BAA97634.1 |
| 92  | 6868       | 7044     | 58        |                                    |                                                                         |           |            |                   |            |
| 28  | 7095       | 7532     | 145       |                                    | ORF49 [bacteriophage phi ETA]                                           | 2.90E-78  | 99         | 100               | BAA97635.1 |
| 23  | 7519       | 8079     | 186       | Major tail                         | ORF50 [bacteriophage phi ETA]                                           | 5.00E-103 | 100        | 100               | BAA97636.1 |
| 27  | 8141       | 8635     | 164       |                                    | ORF51 [bacteriophage phi ETA]                                           | 3.90E-89  | 99         | 100               | BAA97637.1 |
| 39  | 8656       | 8997     | 113       |                                    | ORF52 [bacteriophage phi ETA]                                           | 2.40E-60  | 100        | 100               | BAA97638.1 |
| 1   | 9000       | 12143    | 1047      | Tape measure protein               | tape measure protein [S. aureus phage phi 11]                           | 5.00E-165 | 37         | 87                | AAL82270.1 |
| 16  | 12085      | 11282    | 267       |                                    |                                                                         |           |            |                   |            |
| 14  | 12158      | 13093    | 311       |                                    | ORF54 [bacteriophage phi ETA]                                           | 6.00E-180 | 98         | 100               | BAA97640.1 |
| 3   | 13104      | 14990    | 628       | Endopeptidase                      | endopeptidase [S. pyogenes MGAS10394]                                   | 9.30E-22  | 25         | 46                | AAT86193.1 |
| 2   | 15003      | 16901    | 632       | Minor structural protein           | minor structural protein [S. aureus phage phiP68]                       | 1.20E-37  | 27         | 76                | AAO83891.1 |
| 5   | 16901      | 18724    | 607       |                                    | unknown [S. aureus bacteriophage phi 53]                                | 0         | 94         | 100               | AAM49605.1 |
| 66  | 18198      | 18419    | 73        |                                    |                                                                         |           |            |                   |            |
| 34  | 18724      | 19101    | 125       |                                    | ORF58 [bacteriophage phi ETA]                                           | 6.70E-60  | 91         | 100               | BAA97644.1 |
| 84  | 19102      | 19284    | 60        |                                    | ORF59 [bacteriophage phi ETA]                                           | 3.80E-26  | 93         | 95                | BAA97645.1 |
| 44  | 19325      | 19624    | 99        |                                    | ORF60 [bacteriophage phi ETA]                                           | 7.60E-52  | 100        | 100               | BAA97646.1 |
| 4   | 19761      | 21635    | 624       | Amidase                            | cell wall hydrolase [S. aureus phage phi 11]                            | 0         | 58         | 100               | AAL82277.1 |
| 10  | 21648      | 22820    | 390       | Tail                               | tail fiber [S. aureus phage phi 11]                                     | 0         | 98         | 100               | AAL82278.1 |
| 32  | 22826      | 23221    | 131       |                                    | ORF63 [bacteriophage phi ETA]                                           | 4.50E-69  | 97         | 100               | BAA97649.1 |
| 29  | 23277      | 23714    | 145       | Holin                              | holin [S. aureus phage phi 11]                                          | 1.20E-76  | 99         | 100               | AAL82280.1 |

## Bacteriophage 29 (continued)

| ORF | Start (nt) | End (nt) | Size (aa) | Predicted Function                                    | Representative similarity to proteins in database                   | E-value   | % Identity | % Length of Match | Accession  |
|-----|------------|----------|-----------|-------------------------------------------------------|---------------------------------------------------------------------|-----------|------------|-------------------|------------|
| 7   | 23695      | 25140    | 481       | Amidase                                               | amidase [S. aureus phage phi 11]                                    | 0         | 100        | 100               | AAL82281.1 |
| 80  | 24053      | 24232    | 59        | Amidase                                               | amidase [bacteriophage 80 alpha]                                    | 3.80E-18  | 96         | 76                | AAB39699.1 |
| 173 | 25416      | 25315    | 33        |                                                       |                                                                     |           |            |                   |            |
| 130 | 25686      | 25549    | 45        |                                                       |                                                                     |           |            |                   |            |
| 20  | 25816      | 26478    | 220       |                                                       |                                                                     |           |            |                   |            |
| 21  | 26493      | 27134    | 213       |                                                       |                                                                     |           |            |                   |            |
| 11  | 28523      | 27477    | 348       | Integrase                                             | integrase [S. aureus phage phi 11]                                  | 0         | 98         | 100               | AAL82229.1 |
| 86  | 28636      | 28815    | 59        | Excisionase                                           | excisionase [S. aureus subsp. aureus Mu50]                          | 3.80E-26  | 97         | 100               | BAB57010.1 |
| 33  | 29196      | 28795    | 133       |                                                       | unknown [S. aureus subsp. aureus Mu50]                              | 3.80E-68  | 97         | 100               | BAB57011.1 |
| 72  | 29728      | 29525    | 67        |                                                       | unknown [S. aureus subsp. aureus Mu50]                              | 4.20E-30  | 97         | 94                | BAB57011.1 |
| 22  | 30393      | 29764    | 209       | LexA repressor                                        | LexA repressor [B. cereus ATCC 14579]                               | 4.30E-27  | 35         | 100               | AAP10633.1 |
| 49  | 30547      | 30774    | 75        | DNA-binding; Repressor                                | unknown [LactoB. plantarum WCFS1]                                   | 7.70E-05  | 32         | 74                | CAD63511.1 |
| 102 | 30797      | 30958    | 53        |                                                       |                                                                     |           |            |                   |            |
| 56  | 31199      | 30951    | 82        |                                                       |                                                                     |           |            |                   |            |
| 82  | 31638      | 31823    | 61        | Helix-turn-helix motif                                | ORF10 [bacteriophage phi ETA]                                       | 3.40E-27  | 100        | 100               | BAA97596.1 |
| 18  | 31825      | 32568    | 247       | Antirepressor                                         | anti repressor [S. aureus subsp. aureus N315]                       | 5.00E-122 | 90         | 100               | BAB43081.1 |
| 91  | 32593      | 32769    | 58        |                                                       | orf 10 [S. aureus prophage phiPV83]                                 | 2.30E-23  | 93         | 100               | BAA97817.1 |
| 58  | 32974      | 32744    | 76        |                                                       | orf 11 [S. aureus prophage phiPV83]                                 | 4.50E-37  | 99         | 100               | BAA97818.1 |
| 67  | 33045      | 33266    | 73        | Transcriptional regulator                             | orf 12 [S. aureus prophage phiPV83]                                 | 8.30E-31  | 93         | 100               | BAA97819.1 |
| 101 | 33259      | 33420    | 53        |                                                       | putative exported protein [S. aureus subsp. aureus MSSA476]         | 8.10E-24  | 98         | 100               | CAG43717.1 |
| 191 | 33389      | 33279    | 36        |                                                       |                                                                     |           |            |                   |            |
| 48  | 33517      | 33777    | 86        |                                                       | orf 39 [S. aureus bacteriophage PVL]                                | 1.60E-44  | 98         | 100               | BAA31913.1 |
| 64  | 33787      | 34008    | 73        |                                                       | unknown [S. aureus subsp. aureus Mu50]                              | 9.20E-22  | 63         | 100               | BAB57024.1 |
| 17  | 34001      | 34789    | 262       |                                                       | ORF17 [bacteriophage phi ETA]                                       | 1.70E-99  | 67         | 98                | BAA97603.1 |
| 24  | 34818      | 35369    | 183       | ssDNA-binding                                         | ssb [S. aureus phage phi 11]                                        | 1.50E-61  | 63         | 100               | AAL82241.1 |
| 71  | 35158      | 35361    | 67        |                                                       | ORF19 [bacteriophage phi ETA]                                       | 1.10E-30  | 99         | 100               | BAA97605.1 |
| 19  | 35382      | 36074    | 230       |                                                       | ORF20 [bacteriophage phi ETA]                                       | 1.00E-126 | 98         | 96                | BAA97606.1 |
| 15  | 36046      | 36852    | 268       | DnaD and phage-associated domain; Replisome organizer | putative phage regulatory protein [S. aureus subsp. aureus MSSA476] | 3.20E-05  | 20         | 78                | CAG43710.1 |
| 38  | 36852      | 37208    | 118       |                                                       |                                                                     |           |            |                   |            |
| 8   | 37205      | 38446    | 413       | DnaB-like helicase                                    | helicase DnaB [S. aureus phage phi 11]                              | 0         | 99         | 100               | AAL82244.1 |
| 69  | 38443      | 38658    | 71        |                                                       |                                                                     |           |            |                   |            |
| 65  | 38662      | 38883    | 73        |                                                       | ORF24 [bacteriophage phi ETA]                                       | 1.30E-36  | 100        | 100               | BAA97610.1 |
| 31  | 38894      | 39298    | 134       |                                                       | ORF25 [bacteriophage phi ETA]                                       | 6.00E-74  | 99         | 100               | BAA97611.1 |

Bacteriophage 29 (continued)

| ORF | Start (nt) | End (nt) | Size (aa) | Predicted Function             | Representative similarity to proteins in database              | E-value  | % Identity | % Length of Match | Accession  |
|-----|------------|----------|-----------|--------------------------------|----------------------------------------------------------------|----------|------------|-------------------|------------|
| 83  | 39303      | 39488    | 61        |                                | orf 23 [S. aureus prophage phiPV83]                            | 7.10E-25 | 90         | 100               | BAA97830.1 |
| 35  | 39489      | 39860    | 123       |                                | putative DNA-binding protein [S. aureus subsp. aureus MSSA476] | 2.00E-11 | 43         | 76                | CAG42686.1 |
| 55  | 39861      | 40109    | 82        |                                | unknown [S. aureus subsp. aureus N315]                         | 3.30E-37 | 89         | 100               | BAB43064.1 |
| 54  | 40114      | 40371    | 85        |                                | orf 52 [S. aureus bacteriophage PVL]                           | 1.20E-39 | 99         | 96                | BAA31925.1 |
| 25  | 40364      | 40873    | 169       | dUTPase                        | dUTPase [S. aureus bacteriophage PVL]                          | 7.00E-92 | 100        | 100               | BAA31926.1 |
| 60  | 40910      | 41146    | 78        |                                | unknown [S. aureus temperate phage phiSLT]                     | 2.60E-37 | 100        | 97                | BAB21724.1 |
| 61  | 41171      | 41407    | 78        |                                | unknown [S. aureus temperate phage phiSLT]                     | 2.80E-39 | 99         | 100               | BAB21725.1 |
| 85  | 41397      | 41573    | 58        | Transcriptional activator RinB | rinB [S. aureus phage phi 11]                                  | 3.90E-23 | 90         | 100               | AAL82255.1 |
| 37  | 41574      | 41939    | 121       |                                |                                                                |          |            |                   |            |
| 118 | 41940      | 42086    | 48        |                                | unknown [S. aureus subsp. aureus Mu50]                         | 6.30E-08 | 96         | 58                | BAB57045.1 |
| 30  | 42111      | 42533    | 140       | Transcriptional activator RinA | rinA [S. aureus phage phi 11]                                  | 1.20E-71 | 94         | 99                | AAL82256.1 |

## Bacteriophage 52A

| ORF | Start (nt) | End (nt) | Size (aa) | Predicted Function                 | Representative similarity to proteins in database                       | E-value   | % Identity | % Length of Match | Accession  |
|-----|------------|----------|-----------|------------------------------------|-------------------------------------------------------------------------|-----------|------------|-------------------|------------|
| 94  | 462        | 629      | 55        |                                    | ORF39 [bacteriophage phi ETA]                                           | 1.20E-22  | 96         | 100               | BAA97625.1 |
| 9   | 622        | 1830     | 402       | Large terminase                    | putative phage terminase [Nocardia farcinica IFM 10152]                 | 2.00E-37  | 31         | 100               | BAD58781.1 |
| 6   | 1784       | 3262     | 492       | Portal                             | portal protein [Bacteriophage SPP1]                                     | 1.00E-73  | 35         | 99                | CAA39541.1 |
| 12  | 3201       | 4181     | 326       | Head morphogenesis                 | ORF42 (product required for head morphogenesis) [bacteriophage phi ETA] | 2.00E-180 | 98         | 98                | BAA97628.1 |
| 47  | 4202       | 3933     | 89        |                                    |                                                                         |           |            |                   |            |
| 25  | 4279       | 4803     | 174       | Minor capsid                       | ORF43 (minor capsid protein) [bacteriophage phi ETA]                    | 6.50E-72  | 85         | 93                | BAA97629.1 |
| 142 | 4676       | 4798     | 40        |                                    |                                                                         |           |            |                   |            |
| 11  | 4815       | 5774     | 319       | ATP-binding                        |                                                                         |           |            |                   |            |
| 45  | 5791       | 6117     | 108       | Rho termination factor, N-terminal | ORF45 [bacteriophage phi ETA]                                           | 1.20E-43  | 82         | 100               | BAA97631.1 |
| 48  | 6117       | 6431     | 104       | Head morphogenesis                 | ORF46 (product required for head morphogenesis) [bacteriophage phi ETA] | 1.40E-53  | 96         | 100               | BAA97632.1 |
| 43  | 6424       | 6759     | 111       | Head-tail adaptor                  | ORF47 [bacteriophage phi ETA]                                           | 6.10E-59  | 95         | 100               | BAA97633.1 |
| 41  | 6809       | 7159     | 116       | Major tail                         | putative major tail protein [LactoB. johnsonii prophage Lj928]          | 6.40E-05  | 38         | 52                | AAR27382.1 |
| 88  | 6945       | 7121     | 58        |                                    |                                                                         |           |            |                   |            |
| 30  | 7172       | 7609     | 145       |                                    | ORF49 [bacteriophage phi ETA]                                           | 1.20E-76  | 98         | 100               | BAA97635.1 |
| 21  | 7596       | 8156     | 186       | Major tail                         | ORF50 [bacteriophage phi ETA]                                           | 5.00E-103 | 100        | 100               | BAA97636.1 |
| 27  | 8218       | 8712     | 164       |                                    | ORF51 [bacteriophage phi ETA]                                           | 3.00E-89  | 99         | 100               | BAA97637.1 |
| 1   | 9077       | 12220    | 1047      | Tape measure protein               | tape measure protein [S. aureus phage phi 11]                           | 4.00E-166 | 37         | 87                | AAL82270.1 |
| 14  | 12235      | 13170    | 311       |                                    | ORF54 [bacteriophage phi ETA]                                           | 0         | 99         | 100               | BAA97640.1 |
| 3   | 13181      | 15067    | 628       | Endopeptidase                      | Phage endopeptidase [S. pyogenes MGAS10394]                             | 7.10E-22  | 25         | 46                | AAT86193.1 |
| 2   | 15080      | 16978    | 632       | Minor structural protein           | minor structural protein [S. aureus phage phiP68]                       | 5.40E-38  | 27         | 77                | AAO83891.1 |
| 155 | 16068      | 16184    | 38        |                                    |                                                                         |           |            |                   |            |
| 5   | 16978      | 18801    | 607       |                                    | ORF57 [bacteriophage phi ETA]                                           | 0         | 82         | 100               | BAA97643.1 |
| 71  | 18275      | 18496    | 73        |                                    |                                                                         |           |            |                   |            |
| 38  | 18801      | 19178    | 125       |                                    | ORF58 [bacteriophage phi ETA]                                           | 2.00E-59  | 91         | 100               | BAA97644.1 |
| 84  | 19179      | 19361    | 60        |                                    | ORF59 [bacteriophage phi ETA]                                           | 3.80E-26  | 93         | 95                | BAA97645.1 |
| 49  | 19402      | 19701    | 99        |                                    | unknown [S. aureus temperate phage phiSLT]                              | 7.60E-52  | 100        | 100               | BAB21751.1 |
| 4   | 19838      | 21712    | 624       | Amidase                            | cell wall hydrolase [S. aureus phage phi 11]                            | 0         | 58         | 100               | AAL82277.1 |
| 8   | 21725      | 22963    | 412       | Tail fiber                         | tail fiber [S. aureus subsp. aureus Mu50]                               | 0         | 98         | 100               | BAB57072.1 |
| 36  | 22968      | 23363    | 131       |                                    | ORF63 [bacteriophage phi ETA]                                           | 9.10E-70  | 97         | 100               | BAA97649.1 |
| 31  | 23419      | 23856    | 145       | Holin                              | holin [S. aureus subsp. aureus Mu50]                                    | 5.10E-75  | 96         | 100               | BAB57074.1 |
| 7   | 23837      | 25282    | 481       | Amidase                            | amidase [S. aureus phage phi 11]                                        | 0         | 99         | 100               | AAL82281.1 |
| 157 | 24195      | 24302    | 35        | Amidase                            | amidase [bacteriophage 80 alpha]                                        | 8.10E-06  | 79         | 82                | AAB39699.1 |

## Bacteriophage 52A (continued)

| ORF | Start (nt) | End (nt) | Size (aa) | Predicted Function                | Representative similarity to proteins in database                                            | E-value   | % Identity | % Length of Match | Accession  |
|-----|------------|----------|-----------|-----------------------------------|----------------------------------------------------------------------------------------------|-----------|------------|-------------------|------------|
| 13  | 26059      | 26853    | 264       |                                   |                                                                                              |           |            |                   |            |
| 19  | 26860      | 27597    | 245       |                                   | unknown [S. aureus subsp. aureus MRSA252]                                                    | 1.30E-23  | 41         | 57                | CAG40307.1 |
| 10  | 29329      | 28124    | 401       | Integrase                         | phage integrase [S. aureus subsp. aureus MSSA476]                                            | 0         | 85         | 100               | CAG42666.1 |
| 26  | 29893      | 29393    | 166       |                                   | putative lipoprotein [S. aureus subsp. aureus MRSA252]                                       | 2.80E-13  | 37         | 83                | CAG40557.1 |
| 28  | 30388      | 29897    | 163       |                                   |                                                                                              |           |            |                   |            |
| 29  | 30867      | 30409    | 152       |                                   | unknown [S. aureus subsp. aureus MRSA252]                                                    | 4.80E-85  | 100        | 100               | CAG40556.1 |
| 54  | 31215      | 30937    | 92        | Repressor                         | putative phage regulatory protein [S. aureus subsp. aureus MSSA476]                          | 1.20E-28  | 66         | 100               | CAG42672.1 |
| 72  | 31378      | 31587    | 69        | Repressor                         | putative phage regulatory protein [S. aureus subsp. aureus MSSA476]                          | 1.60E-10  | 51         | 94                | CAG42673.1 |
| 18  | 31626      | 32351    | 241       | Antirepressor                     | anti-repressor [S. aureus phage phi 11]                                                      | 5.00E-52  | 57         | 85                | AAL82235.1 |
| 73  | 32376      | 32585    | 69        |                                   |                                                                                              |           |            |                   |            |
| 79  | 32599      | 32760    | 53        |                                   | putative exported protein [S. aureus subsp. aureus MSSA476]                                  | 4.40E-22  | 91         | 100               | CAG43717.1 |
| 171 | 32729      | 32619    | 36        |                                   |                                                                                              |           |            |                   |            |
| 46  | 32853      | 33170    | 105       |                                   |                                                                                              |           |            |                   |            |
| 44  | 33175      | 33435    | 86        |                                   | orf 39 [S. aureus bacteriophage PVL]                                                         | 2.60E-26  | 66         | 100               | BAA31913.1 |
| 23  | 33448      | 33984    | 178       | Chromosome segregation            | chromosome segregation SMC protein [OceanoB. iheyensis HTE831]                               | 3.30E-05  | 24         | 84                | BAC13484.1 |
| 16  | 33985      | 34764    | 259       |                                   | ORF17 [bacteriophage phi ETA]                                                                | 6.00E-145 | 99         | 100               | BAA97603.1 |
| 22  | 34794      | 35348    | 184       | ssDNA-binding                     | ssb [S. aureus phage phi 11]                                                                 | 7.00E-105 | 100        | 100               | AAL82241.1 |
| 20  | 35361      | 36053    | 230       |                                   | ORF20 [bacteriophage phi ETA]                                                                | 1.00E-126 | 98         | 96                | BAA97606.1 |
| 15  | 36025      | 36840    | 271       | Replisome organizer               | putative replisome organizer [Lactococcus bacteriophage 4268]                                | 7.10E-08  | 22         | 100               | AAM83050.1 |
| 17  | 36850      | 37623    | 257       | DNA replication protein DnaC      | dnaC [S. aureus phage phi 13]                                                                | 7.00E-127 | 86         | 100               | AAL82346.1 |
| 98  | 37617      | 37778    | 53        |                                   | unknown [S. aureus subsp. aureus Mu50]                                                       | 1.80E-07  | 52         | 98                | BAB57032.1 |
| 68  | 37791      | 38012    | 73        |                                   | ORF24 [bacteriophage phi ETA]                                                                | 1.30E-36  | 100        | 100               | BAA97610.1 |
| 32  | 38022      | 38447    | 141       | DNA N-6-adenine-methyltransferase | prophage LambdaSo, DNA modification methyltransferase, putative [Shewanella oneidensis MR-1] | 2.90E-17  | 37         | 100               | AAN56016.1 |
| 33  | 38444      | 38848    | 134       |                                   | ORF25 [bacteriophage phi ETA]                                                                | 1.70E-73  | 96         | 100               | BAA97611.1 |
| 83  | 38853      | 39038    | 61        |                                   | ORF26 [bacteriophage phi ETA]                                                                | 2.00E-27  | 95         | 100               | BAA97612.1 |
| 40  | 39039      | 39401    | 120       | DNA-binding                       | putative DNA-binding protein [S. aureus subsp. aureus MSSA476]                               | 7.00E-12  | 53         | 55                | CAG42686.1 |
| 62  | 39402      | 39650    | 82        |                                   | unknown [S. aureus subsp. aureus MRSA252]                                                    | 2.50E-40  | 96         | 96                | CAG41061.1 |
| 61  | 39664      | 39912    | 82        |                                   | orf 52 [S. aureus bacteriophage PVL]                                                         | 4.20E-40  | 100        | 100               | BAA31925.1 |
| 24  | 39887      | 40414    | 175       | dUTPase                           | dUTPase [S. aureus bacteriophage PVL]                                                        | 3.30E-95  | 100        | 100               | BAA31926.1 |
| 63  | 40451      | 40696    | 81        |                                   | orf 54 [S. aureus bacteriophage PVL]                                                         | 8.80E-38  | 100        | 96                | BAA31927.1 |
| 74  | 40693      | 40899    | 68        |                                   | ORF35 [bacteriophage phi ETA]                                                                | 1.50E-32  | 100        | 100               | BAA97621.1 |
| 85  | 40896      | 41069    | 57        | Transcriptional activator RinB    | rinB [S. aureus phage phi 11]                                                                | 4.00E-23  | 93         | 100               | AAL82255.1 |
| 35  | 41070      | 41471    | 133       |                                   | ORF38 [bacteriophage phi ETA]                                                                | 3.60E-71  | 100        | 100               | BAA97624.1 |

## Bacteriophage 88

| ORF | Start (nt) | End (nt) | Size (aa) | Predicted Function        | Representative similarity to proteins in database                       | E-value   | % Identity | % Length of Match | Accession  |
|-----|------------|----------|-----------|---------------------------|-------------------------------------------------------------------------|-----------|------------|-------------------|------------|
| 28  | 143        | 631      | 162       | Small terminase           | putative small terminase [S. aureus subsp. aureus MRSA252]              | 7.40E-32  | 48.67      | 92                | CAG39405.1 |
| 8   | 615        | 1880     | 421       | Large terminase           | terminase [Bacteriophage SPP1]                                          | 4.00E-141 | 59.47      | 99                | CAA39537.1 |
| 90  | 754        | 566      | 62        |                           |                                                                         |           |            |                   |            |
| 7   | 1881       | 3305     | 474       | Portal                    | portal protein [Bacteriophage SPP1]                                     | 6.90E-72  | 33.74      | 100               | CAA39541.1 |
| 11  | 3262       | 4224     | 320       | Head morphogenesis        | ORF42 (product required for head morphogenesis) [bacteriophage phi ETA] | 6.00E-180 | 98.12      | 100               | BAA97628.1 |
| 48  | 4245       | 3976     | 89        |                           |                                                                         |           |            |                   |            |
| 23  | 4322       | 4918     | 198       | Minor capsid              | minor capsid protein [Bacteriophage phig1e]                             | 4.60E-20  | 30.41      | 97                | CAA66737.1 |
| 15  | 4939       | 5763     | 274       | Major capsid              | major capsid protein [temperate phage PhiNIH1.1]                        | 9.60E-61  | 48.5       | 97                | AAL15075.1 |
| 47  | 5780       | 6106     | 108       | Head-tail adaptor         | ORF45 [bacteriophage phi ETA]                                           | 1.50E-52  | 96.3       | 100               | BAA97631.1 |
| 49  | 6106       | 6420     | 104       | Head morphogenesis        | ORF46 (product required for head morphogenesis) [bacteriophage phi ETA] | 1.60E-54  | 98.08      | 100               | BAA97632.1 |
| 46  | 6413       | 6748     | 111       | Head-tail adaptor         | ORF47 [bacteriophage phi ETA]                                           | 1.40E-60  | 98.2       | 100               | BAA97633.1 |
| 43  | 6735       | 7148     | 137       | Major tail                | putative major tail protein [LactoB. johnsonii prophage Lj928]          | 2.60E-05  | 32.1       | 59                | AAR27382.1 |
| 96  | 6934       | 7110     | 58        |                           |                                                                         |           |            |                   |            |
| 32  | 7161       | 7598     | 145       | Inorganic pyrophosphatase | ORF49 [bacteriophage phi ETA]                                           | 4.20E-77  | 98.62      | 100               | BAA97635.1 |
| 26  | 7585       | 8145     | 186       |                           | ORF50 [bacteriophage phi ETA]                                           | 5.00E-103 | 100        | 100               | BAA97636.1 |
| 29  | 8207       | 8701     | 164       |                           | ORF51 [bacteriophage phi ETA]                                           | 1.00E-89  | 100        | 100               | BAA97637.1 |
| 45  | 8722       | 9063     | 113       |                           | ORF52 [bacteriophage phi ETA]                                           | 2.40E-60  | 100        | 100               | BAA97638.1 |
| 1   | 9066       | 12035    | 989       | Tape measure protein      | tape measure protein [S. aureus phage phi 11]                           | 2.00E-165 | 36.88      | 93                | AAL82270.1 |
| 13  | 12050      | 12985    | 311       |                           | ORF54 [bacteriophage phi ETA]                                           | 1.00E-179 | 98.07      | 100               | BAA97640.1 |
| 3   | 12996      | 14882    | 628       | Endopeptidase             | phage endopeptidase [S. pyogenes MGAS10394]                             | 9.30E-22  | 25.43      | 46                | AAT86193.1 |
| 2   | 14895      | 16793    | 632       | Minor structural protein  | minor structural protein [S. aureus phage phiP68]                       | 3.20E-38  | 27.27      | 76                | AAO83891.1 |
| 5   | 16793      | 18616    | 607       |                           | ORF57 [bacteriophage phi ETA]                                           | 0         | 77.92      | 100               | BAA97643.1 |
| 70  | 18090      | 18311    | 73        |                           |                                                                         |           |            |                   |            |
| 41  | 18616      | 18993    | 125       |                           | ORF58 [bacteriophage phi ETA]                                           | 1.10E-62  | 94.4       | 100               | BAA97644.1 |
| 97  | 18994      | 19170    | 58        |                           | ORF59 [bacteriophage phi ETA]                                           | 5.00E-26  | 92.98      | 98                | BAA97645.1 |
| 53  | 19211      | 19510    | 99        |                           | unknown [S. aureus temperate phage phiSLT]                              | 3.30E-31  | 62.63      | 100               | BAB21751.1 |
| 4   | 19647      | 21521    | 624       | Amidase                   | peptidoglycan hydrolase [S. aureus bacteriophage phi 53]                | 0         | 58.76      | 100               | AAM49609.1 |
| 9   | 21534      | 22772    | 412       | Tail                      | tail fiber [S. aureus subsp. aureus Mu50]                               | 0         | 97.82      | 100               | BAB57072.1 |
| 36  | 22778      | 23173    | 131       |                           | ORF63 [bacteriophage phi ETA]                                           | 9.10E-70  | 96.95      | 100               | BAA97649.1 |
| 33  | 23229      | 23666    | 145       | Holin                     | holin [S. aureus phage phi 11]                                          | 1.20E-76  | 98.62      | 100               | AAL82280.1 |
| 6   | 23647      | 25092    | 481       | Amidase                   | amidase [S. aureus subsp. aureus Mu50]                                  | 0         | 99.79      | 100               | BAB57075.1 |

Bacteriophage 88 (continued)

| ORF | Start (nt) | End (nt) | Size (aa) | Predicted Function                | Representative similarity to proteins in database                                            | E-value   | % Identity | % Length of Match | Accession  |
|-----|------------|----------|-----------|-----------------------------------|----------------------------------------------------------------------------------------------|-----------|------------|-------------------|------------|
| 87  | 24005      | 24184    | 59        | Amidase                           | amidase [bacteriophage 80 alpha]                                                             | 4.10E-12  | 73.33      | 76                | AAB39699.1 |
| 24  | 25481      | 26068    | 195       |                                   |                                                                                              |           |            |                   |            |
| 31  | 26065      | 26520    | 151       |                                   |                                                                                              |           |            |                   |            |
| 10  | 27892      | 26846    | 348       | Integrase                         | integrase [S. aureus phage phi 11]                                                           | 0         | 97.99      | 100               | AAL82229.1 |
| 12  | 28883      | 27954    | 309       |                                   | putative lipoprotein [S. aureus subsp. aureus MSSA476]                                       | 6.40E-35  | 37.02      | 76                | CAG42523.1 |
| 30  | 29360      | 28902    | 152       |                                   | unknown [S. aureus subsp. aureus MRSA252]                                                    | 4.80E-85  | 100        | 100               | CAG40556.1 |
| 50  | 29696      | 29382    | 104       | Repressor                         | putative phage regulatory protein [S. aureus subsp. aureus MSSA476]                          | 1.50E-20  | 46.6       | 99                | CAG42672.1 |
| 64  | 29849      | 30061    | 70        | Repressor                         |                                                                                              |           |            |                   |            |
| 19  | 30138      | 30902    | 254       | Antirepressor                     | anti-repressor [S. aureus phage phi 11]                                                      | 6.00E-121 | 83.85      | 100               | AAL82235.1 |
| 124 | 31144      | 31287    | 47        |                                   | unknown [S. aureus subsp. aureus Mu50]                                                       | 1.80E-18  | 97.87      | 100               | BAB57019.1 |
| 73  | 31486      | 31277    | 69        |                                   | unknown [S. aureus temperate phage phiSLT]                                                   | 3.40E-32  | 100        | 100               | BAB21703.1 |
| 71  | 31557      | 31778    | 73        | Transcriptional regulator         | orf 12 [S. aureus prophage phiPV83]                                                          | 2.30E-33  | 97.26      | 100               | BAA97819.1 |
| 107 | 31771      | 31932    | 53        |                                   | putative exported protein [S. aureus subsp. aureus MSSA476]                                  | 1.50E-22  | 94.34      | 100               | CAG43717.1 |
| 188 | 31901      | 31791    | 36        |                                   |                                                                                              |           |            |                   |            |
| 58  | 32025      | 32285    | 86        |                                   | unknown [S. aureus subsp. aureus MSSA476]                                                    | 6.20E-44  | 97.67      | 100               | CAG43716.1 |
| 72  | 32295      | 32516    | 73        |                                   | unknown [S. aureus subsp. aureus Mu50]                                                       | 1.30E-36  | 98.63      | 100               | BAB57024.1 |
| 21  | 32509      | 33132    | 207       | Topoisomerase                     | prophage pi2 protein 11, topoisomerase [Lactococcus lactis subsp. lactis II1403]             | 3.00E-20  | 35.96      | 85                | AAK05116.1 |
| 35  | 33132      | 33557    | 141       | ssDNA-binding                     | single strand DNA-binding protein [S. aureus prophage phiPV83]                               | 7.00E-72  | 94.37      | 100               | BAA97825.1 |
| 27  | 33568      | 34119    | 183       | HNH endonuclease                  | prophage LambdaSa2, HNH endonuclease family protein [Streptococcus agalactiae 2603V/R]       | 7.70E-21  | 39.34      | 100               | AAN00738.1 |
| 20  | 34120      | 34794    | 224       |                                   | orf 19 [S. aureus prophage phiPV83]                                                          | 4.00E-125 | 95.93      | 98                | BAA97826.1 |
| 169 | 34791      | 34907    | 38        |                                   | 77ORF151 [Bacteriophage 77]                                                                  | 6.80E-13  | 100        | 100               | AAR87940.1 |
| 14  | 35757      | 34900    | 285       |                                   | unknown phage protein [S. pyogenes MGAS10394]                                                | 4.20E-22  | 35.93      | 58                | AAT86873.1 |
| 18  | 35822      | 36592    | 256       | DNA replication                   | DnaA analog [Bacteriophage LL-H]                                                             | 8.40E-40  | 37.46      | 100               | AAL77546.1 |
| 17  | 36602      | 37381    | 259       | DNA replication protein DnaC      | dnaC [S. aureus phage phi 13]                                                                | 5.00E-147 | 97.68      | 100               | AAL82346.1 |
| 108 | 37375      | 37536    | 53        |                                   | unknown [S. aureus subsp. aureus Mu50]                                                       | 1.80E-07  | 51.92      | 98                | BAB57032.1 |
| 67  | 37549      | 37770    | 73        |                                   | ORF24 [bacteriophage phi ETA]                                                                | 5.00E-36  | 98.63      | 100               | BAA97610.1 |
| 34  | 37780      | 38205    | 141       | DNA N-6-adenine-methyltransferase | prophage LambdaSo, DNA modification methyltransferase, putative [Shewanella oneidensis MR-1] | 2.20E-17  | 37.01      | 100               | AAN56016.1 |
| 37  | 38202      | 38606    | 134       |                                   | ORF25 [bacteriophage phi ETA]                                                                | 6.00E-74  | 97.76      | 100               | BAA97611.1 |
| 91  | 38611      | 38796    | 61        |                                   | ORF26 [bacteriophage phi ETA]                                                                | 4.00E-28  | 96.72      | 100               | BAA97612.1 |
| 22  | 38797      | 39420    | 207       | DNA-binding                       | putative DNA-binding protein [S. aureus subsp. aureus MSSA476]                               | 1.10E-14  | 33.97      | 75                | CAG42686.1 |
| 62  | 39421      | 39669    | 82        |                                   | orf 51 [S. aureus bacteriophage PVL]                                                         | 6.10E-39  | 93.67      | 96                | BAA31924.1 |
| 44  | 40080      | 40427    | 115       | Sensor                            | possible sensor protein [S. aureus phage phi 13]                                             | 2.80E-56  | 93.04      | 100               | AAL82351.1 |

Bacteriophage 88 (continued)

| ORF | Start (nt) | End (nt) | Size (aa) | Predicted Function              | Representative similarity to proteins in database | E-value  | % Identity | % Length of Match | Accession  |
|-----|------------|----------|-----------|---------------------------------|---------------------------------------------------|----------|------------|-------------------|------------|
| 52  | 40424      | 40732    | 102       |                                 | unknown [S. aureus subsp. aureus MSSA476]         | 7.00E-50 | 93.14      | 100               | CAG42692.1 |
| 60  | 40725      | 40973    | 82        |                                 | orf 52 [S. aureus bacteriophage PVL]              | 1.50E-37 | 93.9       | 100               | BAA31925.1 |
| 25  | 40966      | 41526    | 186       | Winged helix DNA-binding domain | unknown [S. aureus subsp. aureus MRSA252]         | 4.10E-49 | 56.99      | 100               | CAG40530.1 |
| 56  | 41563      | 41850    | 95        |                                 | unknown [S. aureus temperate phage phiSLT]        | 6.00E-20 | 85.19      | 56                | BAB21724.1 |
| 65  | 41843      | 42079    | 78        |                                 | unknown [S. aureus subsp. aureus Mu50]            | 8.10E-39 | 97.44      | 100               | BAB57042.1 |
| 40  | 42069      | 42458    | 129       |                                 | orf31 [S. aureus prophage phiPV83]                | 3.30E-67 | 98.44      | 99                | BAA97838.1 |
| 100 | 42455      | 42628    | 57        | Transcriptional activator RinB  | rinB [S. aureus phage phi 11]                     | 4.00E-23 | 92.98      | 100               | AAL82255.1 |
| 39  | 42629      | 43030    | 133       |                                 | ORF38 [bacteriophage phi ETA]                     | 3.60E-71 | 100        | 100               | BAA97624.1 |



## Bacteriophage 92

| ORF | Start (nt) | End (nt) | Size (aa) | Predicted Function                 | Representative similarity to proteins in database                       | E-value   | % Identity | % Length of Match | Accession  |
|-----|------------|----------|-----------|------------------------------------|-------------------------------------------------------------------------|-----------|------------|-------------------|------------|
| 27  | 140        | 628      | 162       | Small terminase                    | putative wsmall terminase [S. aureus subsp. aureus MRSA252]             | 7.40E-32  | 49         | 92                | CAG39405.1 |
| 9   | 612        | 1877     | 421       | Large terminase                    | putative large terminase [S. pyogenes phage 315.5]                      | 5.00E-117 | 75         | 62                | AAM79934.1 |
| 92  | 751        | 563      | 62        |                                    |                                                                         |           |            |                   |            |
| 7   | 1878       | 3302     | 474       | Portal                             | portal protein [Bacteriophage SPP1]                                     | 6.90E-72  | 34         | 100               | CAA39541.1 |
| 141 | 2135       | 2004     | 43        |                                    |                                                                         |           |            |                   |            |
| 11  | 3259       | 4221     | 320       | Head morphogenesis                 | ORF42 (product required for head morphogenesis) [bacteriophage phi ETA] | 6.00E-180 | 98         | 100               | BAA97628.1 |
| 50  | 4242       | 3973     | 89        |                                    |                                                                         |           |            |                   |            |
| 24  | 4319       | 4915     | 198       | Minor capsid                       | minor capsid protein [Bacteriophage phig1e]                             | 4.60E-20  | 30         | 97                | CAA66737.1 |
| 14  | 4936       | 5760     | 274       | Major capsid                       | major capsid protein [temperate phage PhiNIH1.1]                        | 9.60E-61  | 49         | 97                | AAL15075.1 |
| 48  | 5777       | 6103     | 108       | Rho termination factor, N-terminal | ORF45 [bacteriophage phi ETA]                                           | 1.50E-52  | 96         | 100               | BAA97631.1 |
| 51  | 6103       | 6417     | 104       | Head morphogenesis                 | ORF46 (product required for head morphogenesis) [bacteriophage phi ETA] | 1.60E-54  | 98         | 100               | BAA97632.1 |
| 46  | 6410       | 6745     | 111       | Head-tail adaptor                  | ORF47 [bacteriophage phi ETA]                                           | 1.40E-60  | 98         | 100               | BAA97633.1 |
| 43  | 6732       | 7145     | 137       | Major tail                         | putative major tail protein [LactoB. johnsonii prophage Lj928]          | 2.60E-05  | 32         | 59                | AAR27382.1 |
| 98  | 6931       | 7107     | 58        |                                    |                                                                         |           |            |                   |            |
| 30  | 7158       | 7595     | 145       | Inorganic pyrophosphatase          | ORF49 [bacteriophage phi ETA]                                           | 4.20E-77  | 99         | 100               | BAA97635.1 |
| 26  | 7582       | 8142     | 186       |                                    | ORF50 [bacteriophage phi ETA]                                           | 5.00E-103 | 100        | 100               | BAA97636.1 |
| 28  | 8204       | 8698     | 164       |                                    | ORF51 [bacteriophage phi ETA]                                           | 1.00E-89  | 100        | 100               | BAA97637.1 |
| 45  | 8719       | 9060     | 113       |                                    | ORF52 [bacteriophage phi ETA]                                           | 2.40E-60  | 100        | 100               | BAA97638.1 |
| 1   | 9063       | 12032    | 989       | Tape measure protein               | tape measure protein [S. aureus phage phi 11]                           | 2.00E-165 | 37         | 93                | AAL82270.1 |
| 15  | 11974      | 11171    | 267       |                                    |                                                                         |           |            |                   |            |
| 12  | 12047      | 12982    | 311       |                                    | ORF54 [bacteriophage phi ETA]                                           | 1.00E-179 | 98         | 100               | BAA97640.1 |
| 3   | 12993      | 14879    | 628       | Endopeptidase                      | phage endopeptidase [S. pyogenes MGAS10394]                             | 9.30E-22  | 25         | 46                | AAT86193.1 |
| 2   | 14892      | 16790    | 632       | Minor structural protein           | minor structural protein [S. aureus phage phiP68]                       | 3.20E-38  | 27         | 76                | AAO83891.1 |
| 5   | 16790      | 18613    | 607       |                                    | ORF57 [bacteriophage phi ETA]                                           | 0         | 78         | 100               | BAA97643.1 |
| 72  | 18087      | 18308    | 73        |                                    |                                                                         |           |            |                   |            |
| 39  | 18613      | 18990    | 125       |                                    | ORF58 [bacteriophage phi ETA]                                           | 1.10E-62  | 94         | 100               | BAA97644.1 |
| 99  | 18991      | 19167    | 58        |                                    | ORF59 [bacteriophage phi ETA]                                           | 5.00E-26  | 93         | 98                | BAA97645.1 |
| 57  | 19208      | 19507    | 99        |                                    | unknown [S. aureus temperate phage phiSLT]                              | 3.30E-31  | 63         | 100               | BAB21751.1 |
| 4   | 19644      | 21518    | 624       | Amidase                            | cell wall hydrolase [S. aureus phage phi 11]                            | 0         | 58         | 100               | AAL82277.1 |
| 10  | 21531      | 22703    | 390       | Tail                               | tail fiber [S. aureus phage phi 11]                                     | 0         | 99         | 100               | AAL82278.1 |
| 35  | 22709      | 23104    | 131       |                                    | ORF63 [bacteriophage phi ETA]                                           | 5.90E-69  | 96         | 100               | BAA97649.1 |

Bacteriophage 92 (continued)

| ORF | Start (nt) | End (nt) | Size (aa) | Predicted Function                | Representative similarity to proteins in database                                            | E-value   | % Identity | % Length of Match | Accession  |
|-----|------------|----------|-----------|-----------------------------------|----------------------------------------------------------------------------------------------|-----------|------------|-------------------|------------|
| 31  | 23160      | 23597    | 145       | Holin                             | holin [S. aureus phage phi 11]                                                               | 1.20E-76  | 99         | 100               | AAL82280.1 |
| 6   | 23578      | 25023    | 481       | Amidase                           | amidase [S. aureus phage phi 11]                                                             | 0         | 99         | 100               | AAL82281.1 |
| 89  | 23936      | 24115    | 59        | Amidase                           | amidase [bacteriophage 80 alpha]                                                             | 3.80E-18  | 96         | 76                | AAB39699.1 |
| 113 | 24659      | 24814    | 51        |                                   |                                                                                              |           |            |                   |            |
| 53  | 25420      | 25731    | 103       |                                   |                                                                                              |           |            |                   |            |
| 40  | 25718      | 26101    | 127       |                                   |                                                                                              |           |            |                   |            |
| 8   | 27633      | 26248    | 461       | Integrase; Recombinase; Resolvase | site-specific recombinase for integration and excision [bacteriophage phi-105]               | 4.10E-61  | 34         | 100               | BAA36658.1 |
| 20  | 28520      | 27840    | 226       |                                   | unknown [S. aureus subsp. aureus Mu50]                                                       | 1.10E-31  | 37         | 100               | BAB56579.1 |
| 19  | 29275      | 28556    | 239       | Repressor                         | cl-like repressor [S. aureus phage phi 11]                                                   | 3.00E-133 | 99         | 100               | AAL82233.1 |
| 73  | 29417      | 29635    | 72        | Repressor; DNA-binding            | cro-like repressor [S. aureus phage phi 11]                                                  | 6.60E-36  | 100        | 98                | AAL82234.1 |
| 18  | 29651      | 30388    | 245       | Antirepressor                     | anti-repressor [S. aureus phage phi 11]                                                      | 2.80E-58  | 63         | 83                | AAL82235.1 |
| 77  | 30401      | 30610    | 69        |                                   |                                                                                              |           |            |                   |            |
| 86  | 30624      | 30785    | 53        |                                   | putative exported protein [S. aureus subsp. aureus MRSA252]                                  | 1.20E-22  | 96         | 100               | CAG41074.1 |
| 182 | 30754      | 30644    | 36        |                                   |                                                                                              |           |            |                   |            |
| 52  | 30800      | 31114    | 104       |                                   |                                                                                              |           |            |                   |            |
| 47  | 31179      | 31508    | 109       |                                   |                                                                                              |           |            |                   |            |
| 49  | 31489      | 31749    | 86        |                                   | orf 39 [S. aureus bacteriophage PVL]                                                         | 2.60E-26  | 63         | 100               | BAA31913.1 |
| 29  | 31764      | 32243    | 159       |                                   | orf 16 [S. aureus prophage phiPV83]                                                          | 5.10E-83  | 97         | 100               | BAA97823.1 |
| 22  | 32243      | 32881    | 212       | Recombination                     | recombination protein [temperate phage PhiNIH1.1]                                            | 3.50E-40  | 51         | 86                | AAL15054.1 |
| 33  | 32881      | 33303    | 140       | ssDNA-binding                     | single strand DNA-binding protein [S. aureus prophage phiPV83]                               | 4.70E-68  | 89         | 100               | BAA97825.1 |
| 21  | 33317      | 33991    | 224       |                                   | orf 19 [S. aureus prophage phiPV83]                                                          | 3.00E-124 | 95         | 98                | BAA97826.1 |
| 174 | 33520      | 33407    | 37        |                                   |                                                                                              |           |            |                   |            |
| 164 | 33988      | 34104    | 38        |                                   | 77ORF151 [Bacteriophage 77]                                                                  | 6.80E-13  | 100        | 100               | AAR87940.1 |
| 13  | 34954      | 34097    | 285       |                                   | unknown [S. pyogenes MGAS10394]                                                              | 4.20E-22  | 36         | 58                | AAT86873.1 |
| 17  | 35019      | 35789    | 256       | DNA replication                   | DnaA analog [Bacteriophage LL-H]                                                             | 8.40E-40  | 37         | 100               | AAL77546.1 |
| 16  | 35799      | 36578    | 259       | DNA replication protein DnaC      | dnaC [S. aureus phage phi 13]                                                                | 5.00E-147 | 98         | 100               | AAL82346.1 |
| 107 | 36572      | 36733    | 53        |                                   | 77ORF104 [Bacteriophage 77]                                                                  | 2.80E-08  | 52         | 98                | AAR87935.1 |
| 107 | 36572      | 36733    | 53        |                                   | unknown [S. aureus subsp. aureus Mu50]                                                       | 1.80E-07  | 52         | 98                | BAB57032.1 |
| 70  | 36746      | 36967    | 73        |                                   | ORF24 [bacteriophage phi ETA]                                                                | 5.00E-36  | 99         | 100               | BAA97610.1 |
| 32  | 36977      | 37402    | 141       | DNA N-6-adenine-methyltransferase | prophage LambdaSo, DNA modification methyltransferase, putative [Shewanella oneidensis MR-1] | 2.20E-17  | 37         | 100               | AAN56016.1 |
| 34  | 37399      | 37803    | 134       |                                   | ORF25 [bacteriophage phi ETA]                                                                | 6.00E-74  | 98         | 100               | BAA97611.1 |
| 93  | 37808      | 37993    | 61        |                                   | ORF26 [bacteriophage phi ETA]                                                                | 4.00E-28  | 97         | 100               | BAA97612.1 |
| 23  | 37994      | 38617    | 207       | DNA-binding                       | putative DNA-binding protein [S. aureus subsp. aureus MSSA476]                               | 1.10E-14  | 34         | 75                | CAG42686.1 |

Bacteriophage 92 (continued)

| ORF | Start (nt) | End (nt) | Size (aa) | Predicted Function             | Representative similarity to proteins in database | E-value  | % Identity | % Length of Match | Accession  |
|-----|------------|----------|-----------|--------------------------------|---------------------------------------------------|----------|------------|-------------------|------------|
| 66  | 38618      | 38866    | 82        |                                | orf 51 [S. aureus bacteriophage PVL]              | 6.10E-39 | 94         | 96                | BAA31924.1 |
| 36  | 38879      | 39280    | 133       |                                | unknown [S. aureus subsp. aureus MSSA476]         | 7.60E-53 | 75         | 100               | CAG42690.1 |
| 44  | 39277      | 39624    | 115       |                                | unknown [S. aureus phage phi 12]                  | 4.90E-61 | 100        | 100               | AAL82300.1 |
| 55  | 39621      | 39929    | 102       |                                | unknown [S. aureus subsp. aureus MSSA476]         | 7.00E-50 | 93         | 100               | CAG42692.1 |
| 64  | 39922      | 40170    | 82        |                                | orf 52 [S. aureus bacteriophage PVL]              | 1.50E-37 | 94         | 100               | BAA31925.1 |
| 25  | 40163      | 40723    | 186       |                                | unknown [S. aureus subsp. aureus MRSA252]         | 4.10E-49 | 57         | 100               | CAG40530.1 |
| 59  | 40760      | 41047    | 95        |                                | unknown [S. aureus temperate phage phiSLT]        | 6.00E-20 | 85         | 56                | BAB21724.1 |
| 68  | 41040      | 41276    | 78        |                                | unknown [S. aureus subsp. aureus Mu50]            | 8.10E-39 | 97         | 100               | BAB57042.1 |
| 38  | 41266      | 41655    | 129       |                                | orf31 [S. aureus prophage phiPV83]                | 3.30E-67 | 98         | 99                | BAA97838.1 |
| 100 | 41652      | 41825    | 57        | Transcriptional activator RinB | rinB [S. aureus phage phi 11]                     | 4.00E-23 | 93         | 100               | AAL82255.1 |
| 37  | 41826      | 42227    | 133       |                                | ORF38 [bacteriophage phi ETA]                     | 3.60E-71 | 100        | 100               | BAA97624.1 |

## Bacteriophage X2

| ORF | Start (nt) | End (nt) | Size (aa) | Predicted Function                 | Representative similarity to proteins in database                       | E-value   | % Identity | % Length of Match | Accession  |
|-----|------------|----------|-----------|------------------------------------|-------------------------------------------------------------------------|-----------|------------|-------------------|------------|
| 41  | 89         | 469      | 126       |                                    | unknown [S. pyogenes phage 315.5]                                       | 4.90E-10  | 39         | 73                | AAM79936.1 |
| 9   | 453        | 1718     | 421       | Large terminase                    | putative large terminase [S. pyogenes phage 315.5]                      | 2.00E-116 | 74         | 62                | AAM79934.1 |
| 7   | 1719       | 3143     | 474       | Portal                             | portal protein [Bacteriophage SPP1]                                     | 1.20E-71  | 34         | 100               | CAA39541.1 |
| 11  | 3100       | 4062     | 320       | Head morphogenesis                 | ORF42 (product required for head morphogenesis) [bacteriophage phi ETA] | 6.00E-180 | 98         | 100               | BAA97628.1 |
| 191 | 3902       | 4009     | 35        |                                    |                                                                         |           |            |                   |            |
| 49  | 4083       | 3814     | 89        |                                    |                                                                         |           |            |                   |            |
| 22  | 4160       | 4750     | 196       | Minor capsid                       | minor capsid protein [Bacteriophage phig1e]                             | 4.30E-15  | 28         | 97                | CAA66737.1 |
| 13  | 4768       | 5580     | 270       | Major capsid                       | major capsid protein [temperate phage PhiNIH1.1]                        | 2.70E-44  | 39         | 98                | AAL15075.1 |
| 128 | 5339       | 5521     | 60        |                                    |                                                                         |           |            |                   |            |
| 47  | 5597       | 5923     | 108       | Rho termination factor, N-terminal | ORF45 [bacteriophage phi ETA]                                           | 7.80E-54  | 97         | 100               | BAA97631.1 |
| 50  | 5923       | 6237     | 104       | Head morphogenesis                 | ORF46 (product required for head morphogenesis) [bacteriophage phi ETA] | 9.40E-55  | 98         | 100               | BAA97632.1 |
| 46  | 6230       | 6565     | 111       | Head-tail adaptor                  | ORF47 [bacteriophage phi ETA]                                           | 2.90E-61  | 99         | 100               | BAA97633.1 |
| 44  | 6615       | 6965     | 116       | Major tail                         | putative major tail protein [LactoB. johnsonii prophage Lj928]          | 6.40E-05  | 38         | 52                | AAR27382.1 |
| 94  | 6751       | 6927     | 58        |                                    |                                                                         |           |            |                   |            |
| 30  | 6978       | 7415     | 145       |                                    | ORF49 [bacteriophage phi ETA]                                           | 7.10E-77  | 98         | 100               | BAA97635.1 |
| 24  | 7402       | 7962     | 186       |                                    | ORF50 [bacteriophage phi ETA]                                           | 7.00E-102 | 99         | 100               | BAA97636.1 |
| 28  | 8024       | 8518     | 164       |                                    | ORF51 [bacteriophage phi ETA]                                           | 1.00E-89  | 100        | 100               | BAA97637.1 |
| 45  | 8539       | 8880     | 113       |                                    | ORF52 [bacteriophage phi ETA]                                           | 5.40E-60  | 99         | 100               | BAA97638.1 |
| 1   | 8883       | 11852    | 989       | Tape measure protein               | tape measure protein [S. aureus phage phi 11]                           | 2.00E-166 | 37         | 93                | AAL82270.1 |
| 12  | 11867      | 12802    | 311       |                                    | ORF54 [bacteriophage phi ETA]                                           | 2.00E-178 | 98         | 100               | BAA97640.1 |
| 4   | 12813      | 14699    | 628       | Endopeptidase                      | Phage endopeptidase [S. pyogenes MGAS10394]                             | 1.20E-21  | 25         | 46                | AAT86193.1 |
| 3   | 14712      | 16610    | 632       | Minor structural protein           | minor structural protein [S. aureus phage phiP68]                       | 3.20E-38  | 28         | 77                | AAO83891.1 |
| 166 | 15700      | 15816    | 38        |                                    |                                                                         |           |            |                   |            |
| 6   | 16610      | 18433    | 607       |                                    | ORF57 [bacteriophage phi ETA]                                           | 0         | 81         | 100               | BAA97643.1 |
| 135 | 17907      | 18047    | 46        |                                    |                                                                         |           |            |                   |            |
| 40  | 18433      | 18810    | 125       |                                    | ORF58 [bacteriophage phi ETA]                                           | 1.00E-55  | 84         | 100               | BAA97644.1 |
| 89  | 18811      | 18993    | 60        |                                    | ORF59 [bacteriophage phi ETA]                                           | 1.00E-23  | 86         | 95                | BAA97645.1 |
| 53  | 19033      | 19338    | 101       |                                    | unknown [S. aureus phage phi 11]                                        | 4.30E-31  | 62         | 100               | AAL82276.1 |
| 53  | 19033      | 19338    | 101       |                                    | unknown [S. aureus temperate phage phiSLT]                              | 7.30E-31  | 60         | 100               | BAB21751.1 |
| 5   | 19475      | 21349    | 624       | Amidase                            | cell wall hydrolase [S. aureus phage phi 11]                            | 0         | 58         | 100               | AAL82277.1 |
| 207 | 20880      | 20981    | 33        |                                    |                                                                         |           |            |                   |            |

## Bacteriophage X2 (continued)

| ORF | Start (nt) | End (nt) | Size (aa) | Predicted Function                | Representative similarity to proteins in database                              | E-value   | % Identity | % Length of Match | Accession  |
|-----|------------|----------|-----------|-----------------------------------|--------------------------------------------------------------------------------|-----------|------------|-------------------|------------|
| 2   | 21362      | 23374    | 670       | Tail fiber                        | tail fiber [S. aureus phage phi 11]                                            | 3.10E-71  | 62         | 30                | AAL82278.1 |
| 26  | 23425      | 23862    | 145       | Holin                             | holin [S. aureus phage phi 11]                                                 | 3.30E-74  | 94         | 100               | AAL82280.1 |
| 18  | 23843      | 24484    | 213       | Amidase                           | amidase [S. aureus phage phi 11]                                               | 6.00E-115 | 94         | 95                | AAL82281.1 |
| 27  | 24514      | 25059    | 181       | HNH endonuclease                  | prophage LambdaSa2, HNH endonuclease family protein [S. agalactiae 2603V/R]    | 7.60E-21  | 36         | 99                | AAN00738.1 |
| 19  | 25590      | 26222    | 210       | Amidase                           | amidase [S. aureus phage phi 11]                                               | 1.00E-115 | 91         | 100               | AAL82281.1 |
| 74  | 25858      | 26013    | 51        |                                   |                                                                                |           |            |                   |            |
| 171 | 26400      | 26299    | 33        |                                   |                                                                                |           |            |                   |            |
| 8   | 28207      | 26822    | 461       | Integrase; Recombinase; Resolvase | site-specific recombinase for integration and excision [bacteriophage phi-105] | 8.20E-62  | 33         | 100               | BAA36658.1 |
| 83  | 28316      | 28513    | 65        |                                   | unknown [S. pyogenes MGAS8232]                                                 | 6.40E-10  | 46         | 100               | AAL98050.1 |
| 35  | 28917      | 28510    | 135       |                                   |                                                                                |           |            |                   |            |
| 31  | 29348      | 28911    | 145       |                                   | unknown [S. pneumoniae TIGR4]                                                  | 1.30E-09  | 29         | 93                | AAK75994.1 |
| 15  | 30105      | 29380    | 241       |                                   | unknown [C. perfringens str. 13]                                               | 1.20E-37  | 42         | 76                | BAB79844.1 |
| 110 | 30284      | 30123    | 53        | Repressor                         | ci-like repressor [S. aureus phage phi 12]                                     | 9.90E-14  | 76         | 86                | AAL82286.1 |
| 112 | 30590      | 30742    | 50        |                                   |                                                                                |           |            |                   |            |
| 21  | 30825      | 30223    | 200       | LexA Repressor                    | ci-like repressor [S. aureus phage phi 12]                                     | 2.20E-62  | 64         | 100               | AAL82286.1 |
| 32  | 31021      | 31236    | 71        |                                   | unknown [B. cereus ATCC 14579]                                                 | 6.90E-09  | 43         | 95                | AAP10632.1 |
| 102 | 31252      | 31419    | 55        |                                   |                                                                                |           |            |                   |            |
| 29  | 31952      | 31470    | 160       |                                   | ORF9 [bacteriophage phi ETA]                                                   | 1.00E-83  | 98         | 100               | BAA97595.1 |
| 87  | 32398      | 32583    | 61        | Repressor                         | ORF10 [bacteriophage phi ETA]                                                  | 3.40E-27  | 100        | 100               | BAA97596.1 |
| 16  | 32585      | 33292    | 235       | Antirepressor                     | antirepressor [S. aureus prophage phiPV83]                                     | 1.90E-56  | 94         | 48                | BAA97816.1 |
| 138 | 33307      | 33444    | 45        |                                   |                                                                                |           |            |                   |            |
| 103 | 33428      | 33595    | 55        |                                   | putative exported protein [S. aureus subsp. aureus MSSA476]                    | 2.60E-22  | 96         | 94                | CAG43717.1 |
| 184 | 33558      | 33448    | 36        |                                   |                                                                                |           |            |                   |            |
| 48  | 33596      | 33916    | 106       |                                   | orf 14 [S. aureus prophage phiPV83]                                            | 9.00E-58  | 100        | 100               | BAA97821.1 |
| 62  | 34008      | 34268    | 86        |                                   | ORF15 [bacteriophage phi ETA]                                                  | 4.30E-45  | 99         | 100               | BAA97601.1 |
| 76  | 34278      | 34499    | 73        |                                   | unknown [S. aureus subsp. aureus Mu50]                                         | 5.90E-37  | 100        | 100               | BAB57024.1 |
| 20  | 34492      | 35115    | 207       | Topoisomerase                     | prophage pi2 protein 11, topoisomerase [L. lactis subsp. lactis II1403]        | 3.00E-20  | 36         | 85                | AAK05116.1 |
| 33  | 35115      | 35534    | 139       | ssDNA-binding                     | single strand DNA-binding protein [S. aureus subsp. aureus Mu50]               | 4.90E-65  | 87         | 100               | BAB57026.1 |
| 17  | 35548      | 36222    | 224       |                                   | unknown [S. aureus subsp. aureus Mu50]                                         | 3.00E-126 | 96         | 100               | BAB57028.1 |
| 14  | 36215      | 36979    | 254       | DnaD and phage-associated domain  | unknown [S. aureus phage phi 11]                                               | 7.80E-22  | 43         | 64                | AAL82243.1 |
| 42  | 36979      | 37335    | 118       |                                   |                                                                                |           |            |                   |            |
| 10  | 37332      | 38573    | 413       | DnaB-like helicase                | helicase DnaB [S. aureus phage phi 11]                                         | 0         | 99         | 100               | AAL82244.1 |

Bacteriophage X2 (continued)

| ORF | Start (nt) | End (nt) | Size (aa) | Predicted Function             | Representative similarity to proteins in database | E-value  | % Identity | % Length of Match | Accession  |
|-----|------------|----------|-----------|--------------------------------|---------------------------------------------------|----------|------------|-------------------|------------|
| 78  | 38570      | 38785    | 71        |                                |                                                   |          |            |                   |            |
| 72  | 38788      | 39009    | 73        |                                | ORF24 [bacteriophage phi ETA]                     | 3.80E-36 | 99         | 100               | BAA97610.1 |
| 36  | 39020      | 39424    | 134       |                                | orf 22 [S. aureus prophage phiPV83]               | 1.30E-73 | 99         | 100               | BAA97829.1 |
| 88  | 39429      | 39614    | 61        |                                | ORF26 [bacteriophage phi ETA]                     | 4.00E-28 | 97         | 100               | BAA97612.1 |
| 54  | 39615      | 39920    | 101       |                                | unknown [S. agalactiae NEM316]                    | 2.20E-06 | 33         | 91                | CAD45858.1 |
| 43  | 40048      | 40404    | 118       |                                | unknown [S. aureus subsp. aureus MRSA252]         | 3.40E-38 | 63         | 98                | CAG41062.1 |
| 67  | 40408      | 40650    | 80        |                                | orf 51 [S. aureus bacteriophage PVL]              | 2.10E-39 | 94         | 100               | BAA31924.1 |
| 34  | 40661      | 41071    | 136       |                                | unknown [S. aureus subsp. aureus MSSA476]         | 7.80E-50 | 72         | 99                | CAG42690.1 |
| 58  | 41071      | 41346    | 91        |                                | unknown [S. aureus subsp. aureus MSSA476]         | 1.00E-30 | 85         | 80                | CAG42692.1 |
| 65  | 41339      | 41587    | 82        |                                | unknown [S. aureus subsp. aureus MRSA252]         | 5.70E-37 | 93         | 100               | CAG41059.1 |
| 23  | 41580      | 42140    | 186       |                                | unknown [S. aureus subsp. aureus MRSA252]         | 3.80E-47 | 55         | 100               | CAG40530.1 |
| 77  | 42177      | 42395    | 72        |                                | unknown [S. aureus subsp. aureus Mu50]            | 3.60E-26 | 88         | 88                | BAB57039.1 |
| 70  | 42379      | 42615    | 78        |                                | unknown [S. aureus subsp. aureus Mu50]            | 1.20E-29 | 76         | 100               | BAB57042.1 |
| 90  | 42608      | 42781    | 57        | Transcriptional activator RinB | rinB [S. aureus phage phi 11]                     | 5.20E-23 | 91         | 100               | AAL82255.1 |
| 38  | 42782      | 43183    | 133       |                                | ORF38 [bacteriophage phi ETA]                     | 3.60E-71 | 100        | 100               | BAA97624.1 |

## Bacteriophage K

| ORF | Start (nt) | End (nt) | Size (aa) | Predicted Function               | Representative similarity to proteins in database                             | Genbank gene name | E-value   | % Identity | % Length of Match | Accession  |
|-----|------------|----------|-----------|----------------------------------|-------------------------------------------------------------------------------|-------------------|-----------|------------|-------------------|------------|
| 10  | 13         | 1830     | 605       | Large terminase                  | large terminase [B. subtilis phage 1102phi1-3]                                | ORF35             | 0         | 57         | 94                | AAS45252.1 |
| 39  | 1823       | 2644     | 273       |                                  |                                                                               | ORF36             | 1.00E-153 | 100        | 100               | AAS91583.1 |
| 85  | 2801       | 3280     | 159       |                                  |                                                                               | ORF37             | 1.20E-84  | 100        | 100               | AAO47483.1 |
| 23  | 3373       | 4515     | 380       | S-layer protein; Clumping factor | S-layer protein [C. thermocellum]                                             | ORF38             | 2.60E-15  | 31         | 56                | CAA47841.1 |
|     |            |          |           |                                  | Clumping factor B [S. aureus subsp. aureus Mu50]                              |                   | 3.20E-13  | 31         | 35                | BAB58792.1 |
| 112 | 4579       | 4941     | 120       |                                  |                                                                               | ORF39             | 2.90E-58  | 100        | 94                | AAO47486.1 |
| 108 | 4950       | 5330     | 126       |                                  |                                                                               | ORF40             | 9.60E-67  | 99         | 97                | AAO47487.1 |
| 14  | 5523       | 7025     | 500       | Portal                           | phage portal protein, HK97 family [Wolbachia endosymbiont of D. melanogaster] | ORF41             | 2.10E-05  | 23         | 44                | AAS14672.1 |
| 47  | 7252       | 7992     | 246       | Major capsid                     |                                                                               | ORF42             | 3.00E-137 | 100        | 100               | AAO47489.1 |
| 28  | 8011       | 8961     | 316       | Topoisomerase; Autolysin         | DNA topoisomerase IV subunit A [M. penetrans HF-2]                            | ORF43             | 1.40E-16  | 23         | 95                | BAC44437.1 |
| 28  | 8011       | 8961     | 316       |                                  | putative autolysin [S. cohnii]                                                |                   | 1.90E-13  | 19         | 100               | CAC83649.1 |
| 17  | 9077       | 10468    | 463       | Major capsid                     | major capsid protein [Staphylococcus phage Twort]                             | ORF44             | 0         | 82         | 98                | AAQ62708.1 |
| 139 | 10560      | 10856    | 98        |                                  |                                                                               |                   |           |            |                   |            |
| 30  | 10869      | 11777    | 302       |                                  |                                                                               | ORF45             | 5.00E-179 | 100        | 100               | AAO47492.1 |
| 33  | 11791      | 12669    | 292       |                                  |                                                                               | ORF46             | 1.00E-170 | 100        | 100               | AAO47493.1 |
| 60  | 12747      | 13289    | 180       |                                  |                                                                               | ORF47             | 1.00E-115 | 100        | 100               | AAO47494.1 |
| 38  | 13308      | 14144    | 278       |                                  |                                                                               | ORF48             | 1.00E-156 | 100        | 100               | AAO47495.1 |
| 183 | 14146      | 14361    | 71        |                                  | ORF7 [Bacteriophage A511]                                                     |                   | 1.00E-12  | 48         | 100               | CAA62545.1 |
| 11  | 14388      | 16151    | 587       | Major tail                       | major tail sheath protein [Bacteriophage A511]                                | ORF49             | 0         | 58         | 100               | CAA62546.1 |
| 99  | 16224      | 16652    | 142       |                                  |                                                                               | ORF50             | 1.60E-76  | 100        | 100               | AAO47497.1 |
| 264 | 16749      | 16889    | 46        |                                  |                                                                               |                   |           |            |                   |            |
| 89  | 16932      | 17390    | 152       |                                  |                                                                               | ORF51             | 4.80E-85  | 100        | 100               | AAO47498.1 |
| 197 | 17403      | 17597    | 64        |                                  |                                                                               |                   |           |            |                   |            |
| 129 | 17679      | 17990    | 103       |                                  |                                                                               | ORF100            | 2.50E-55  | 100        | 100               | AAO47549.1 |
| 88  | 18122      | 18580    | 152       |                                  |                                                                               | ORF53             | 5.30E-84  | 100        | 100               | AAO47500.1 |
| 73  | 18624      | 19160    | 178       |                                  |                                                                               |                   |           |            |                   |            |
| 1   | 19213      | 23271    | 1352      | Tape measure protein             | tail tape measure protein [P. syringae pv. tomato str. DC3000]                | ORF55             | 9.40E-17  | 23         | 64                | AAO56871.1 |
| 109 | 22202      | 21825    | 125       |                                  | proline-rich mucin homolog [M. tuberculosis]                                  |                   | 1.40E-09  | 32         | 100               | AAD41594.1 |
| 5   | 23344      | 25776    | 810       | Secretory antigen; Autolysin     | secretory antigen SsaA-like protein [S. epidermidis ATCC 12228]               | ORF56             | 2.40E-33  | 49         | 20                | AAO05088.1 |
|     |            |          |           |                                  | autolysin precursor [S. epidermidis ATCC 12228]                               |                   | 4.40E-19  | 24         | 61                | AAO05873.1 |
| 32  | 25790      | 26677    | 295       |                                  |                                                                               | ORF57             | 5.00E-172 | 100        | 100               | AAO47506.1 |

Bacteriophage K (continued)

| ORF | Start (nt) | End (nt) | Size (aa) | Predicted Function                          | Representative similarity to proteins in database                                         | Genbank gene name | E-value   | % Identity | % Length of Match | Accession  |
|-----|------------|----------|-----------|---------------------------------------------|-------------------------------------------------------------------------------------------|-------------------|-----------|------------|-------------------|------------|
| 4   | 26677      | 29223    | 848       | Glycerophosphoryl diester phosphodiesterase | glycerophosphoryl diester phosphodiesterase [B. subtilis]                                 | ORF58             | 7.30E-41  | 38         | 29                | CAA81292.1 |
| 42  | 29330      | 30121    | 263       |                                             |                                                                                           | ORF59             | 4.00E-149 | 100        | 100               | AAO47508.1 |
| 75  | 30121      | 30645    | 174       |                                             |                                                                                           | ORF60             | 2.10E-94  | 100        | 100               | AAO47509.1 |
| 52  | 30645      | 31349    | 234       |                                             |                                                                                           | ORF61             | 3.00E-131 | 100        | 100               | AAO47510.1 |
| 26  | 31364      | 32410    | 348       |                                             |                                                                                           | ORF62             | 0         | 100        | 100               | AAS91584.1 |
| 3   | 32431      | 35490    | 1019      |                                             |                                                                                           | ORF63             | 0         | 100        | 100               | AAO47511.1 |
| 76  | 35601      | 36122    | 173       |                                             |                                                                                           | ORF64             | 7.10E-95  | 100        | 100               | AAO47512.1 |
| 2   | 36143      | 39601    | 1152      | Virulence-associated                        | Virulence-associated protein [B. henselae str. Houston-1]                                 | ORF65             | 4.60E-65  | 25         | 100               | CAF27126.1 |
| 115 | 37698      | 37348    | 116       |                                             |                                                                                           |                   |           |            |                   |            |
| 234 | 39650      | 39808    | 52        |                                             |                                                                                           |                   |           |            |                   |            |
| 8   | 39809      | 41731    | 640       |                                             |                                                                                           | ORF66             | 0         | 100        | 100               | AAO47515.1 |
| 110 | 41754      | 42128    | 124       |                                             |                                                                                           | ORF67             | 2.00E-67  | 100        | 100               | AAO47516.1 |
| 18  | 42135      | 43511    | 458       |                                             |                                                                                           | ORF68             | 0         | 100        | 100               | AAO47517.1 |
| 12  | 43603      | 45351    | 582       | DEAD/DEAH box helicase                      | putative helicase [S. enterica subsp. enterica serovar Typhi str. CT18]                   | ORF69             | 9.30E-37  | 33         | 48                | CAD09945.1 |
| 13  | 45363      | 46976    | 537       |                                             |                                                                                           | ORF70             | 0         | 100        | 100               | AAO47519.1 |
| 16  | 46969      | 48411    | 480       | AAA ATPase                                  | gp41 DNA primase-helicase subunit [Aeromonas phage 65]                                    | ORF71             | 2.40E-16  | 23         | 92                | AAR90925.1 |
| 27  | 48490      | 49527    | 345       | Exonuclease                                 | ATP-dependent dsDNA exonuclease [A. aeolicus VF5]                                         | ORF72             | 6.80E-12  | 23         | 100               | AAC07689.1 |
| 102 | 49527      | 49904    | 125       |                                             |                                                                                           | ORF73             | 1.00E-71  | 100        | 100               | AAO47522.1 |
| 9   | 49904      | 51823    | 639       | Exonuclease                                 | putative exonuclease subunit 2 [Y. pestis biovar Medievalis str. 91001]                   | ORF74             | 1.30E-55  | 25         | 100               | AAS58684.1 |
| 63  | 51823      | 52419    | 198       |                                             |                                                                                           | ORF84             | 1.00E-111 | 100        | 100               | AAO47533.1 |
| 25  | 52434      | 53501    | 355       | DNA Primase                                 | DNA primase [T. tengcongensis MB4]                                                        | ORF76             | 9.00E-15  | 26         | 100               | AAM24950.1 |
| 117 | 53568      | 53906    | 112       |                                             |                                                                                           |                   |           |            |                   |            |
| 93  | 53906      | 54358    | 150       | Penicillin-binding                          | penicillin-binding protein [B. thuringiensis serovar konkukian str. 97-27]                | ORF77             | 4.70E-05  | 30         | 83                | AAT63192.1 |
| 62  | 54345      | 54953    | 202       |                                             |                                                                                           | ORF78             | 3.00E-118 | 100        | 100               | AAO47527.1 |
| 97  | 54970      | 55362    | 130       | Ribonucleotide reductase; NrdI              | NrdI protein involved in ribonucleotide reductase function [S. aureus subsp. aureus Mu50] | ORF79             | 1.40E-14  | 35         | 83                | BAB56892.1 |
| 6   | 55377      | 57491    | 704       | Ribonucleotide reductase large subunit      | large subunit ribonucleotide reductase [Staphylococcus phage Twort]                       | ORF80             | 0         | 73         | 100               | AAM00816.1 |
| 24  | 57505      | 58554    | 349       | Ribonucleotide reductase small subunit      | ribonucleoside-diphosphate reductase minor subunit [S. epidermidis ATCC 12228]            | ORF81             | 2.40E-95  | 55         | 92                | AAO04111.1 |
| 120 | 58572      | 58901    | 109       |                                             |                                                                                           | ORF82             | 4.40E-57  | 100        | 100               | AAO47531.1 |
| 119 | 58873      | 59205    | 110       |                                             |                                                                                           | ORF83             | 3.50E-54  | 100        | 96                | AAO47532.1 |
| 64  | 59412      | 60008    | 198       |                                             |                                                                                           | ORF75             | 4.00E-111 | 100        | 100               | AAO47524.1 |



Bacteriophage K (continued)

| ORF | Start (nt) | End (nt) | Size (aa) | Predicted Function                       | Representative similarity to proteins in database                      | Genbank gene name | E-value   | % Identity | % Length of Match | Accession  |
|-----|------------|----------|-----------|------------------------------------------|------------------------------------------------------------------------|-------------------|-----------|------------|-------------------|------------|
| 133 | 60018      | 60323    | 101       |                                          |                                                                        |                   |           |            |                   |            |
| 34  | 60399      | 61271    | 290       |                                          |                                                                        | ORF86/ORF88/ORF90 | 8.00E-168 | 100        | 100               | AAO47535.1 |
| 78  | 61464      | 61949    | 161       |                                          |                                                                        | ORF87             | 1.60E-92  | 100        | 96                | AAO47536.1 |
| 19  | 62085      | 63428    | 447       | DNA polymerase I                         | DNA polymerase [Bacteriophage Bastille]                                | ORF86/ORF88/ORF90 | 5.30E-34  | 39         | 47                | AAO93094.1 |
| 40  | 63696      | 64403    | 235       | HNH endonuclease                         | putative HNH homing endonuclease [bacteriophage bIL170]                | ORF89             | 5.60E-24  | 38         | 72                | AAC27227.1 |
| 36  | 64637      | 65497    | 286       | DNA-directed DNA polymerase              | DNA polymerase I [T. thermosulfurigenes]                               | ORF86/ORF88/ORF90 | 6.90E-33  | 34         | 79                | AAR11873.1 |
| 164 | 65566      | 65808    | 80        |                                          |                                                                        |                   |           |            |                   |            |
| 83  | 65825      | 66307    | 160       |                                          |                                                                        | ORF91             | 7.00E-88  | 100        | 100               | AAO47540.1 |
| 20  | 66394      | 67665    | 423       |                                          |                                                                        | ORF92             | 0         | 100        | 100               | AAO47541.1 |
| 21  | 67725      | 68981    | 418       | RecA bacterial DNA recombination protein | recA protein [P. gingivalis W83]                                       | ORF93             | 7.50E-27  | 29         | 81                | AAQ66027.1 |
| 114 | 68985      | 69338    | 117       |                                          |                                                                        | ORF115            | 1.80E-63  | 100        | 100               | AAO47564.1 |
| 54  | 69325      | 69987    | 220       |                                          |                                                                        | ORF94             | 1.00E-124 | 100        | 100               | AAO47543.1 |
| 57  | 70115      | 70747    | 210       |                                          |                                                                        | ORF95             | 5.00E-118 | 100        | 100               | AAO47544.1 |
| 77  | 70761      | 71282    | 173       | Major tail                               | phi12 major tail protein-like protein [S. aureus bacteriophage phi 3A] | ORF96             | 1.80E-21  | 40         | 78                | AAM49601.1 |
| 173 | 71297      | 71524    | 75        |                                          |                                                                        |                   |           |            |                   |            |
| 155 | 71620      | 71880    | 86        |                                          |                                                                        |                   |           |            |                   |            |
| 45  | 71884      | 72639    | 251       |                                          |                                                                        | ORF97             | 1.00E-144 | 100        | 100               | AAO47546.1 |
| 22  | 72632      | 73882    | 416       | Metallophosphoesterase                   |                                                                        | ORF98             | 0         | 100        | 100               | AAO47547.1 |
| 111 | 73896      | 74264    | 122       |                                          |                                                                        | ORF99             | 1.30E-63  | 100        | 100               | AAO47548.1 |
| 127 | 74251      | 74562    | 103       |                                          |                                                                        | ORF113            | 4.20E-55  | 100        | 100               | AAO47563.1 |
| 72  | 74626      | 75162    | 178       |                                          |                                                                        | ORF54             | 2.00E-101 | 100        | 100               | AAO47501.1 |
| 44  | 75155      | 75922    | 255       |                                          |                                                                        | ORF101            | 2.00E-150 | 100        | 100               | AAO47550.1 |
| 94  | 75900      | 76346    | 148       |                                          |                                                                        | ORF102            | 1.40E-80  | 100        | 100               | AAO47551.1 |
| 35  | 76346      | 77209    | 287       |                                          |                                                                        |                   |           |            |                   |            |
| 46  | 77581      | 78312    | 243       |                                          |                                                                        | ORF103            | 2.00E-133 | 100        | 100               | AAO47553.1 |
| 90  | 78330      | 78788    | 152       |                                          |                                                                        | ORF104            | 6.90E-84  | 100        | 100               | AAO47554.1 |
| 95  | 78853      | 79296    | 147       |                                          |                                                                        | ORF105            | 9.20E-80  | 100        | 100               | AAO47555.1 |
| 51  | 79313      | 80017    | 234       |                                          |                                                                        | ORF106            | 5.00E-132 | 100        | 100               | AAO47556.1 |
| 101 | 80079      | 80477    | 132       |                                          |                                                                        | ORF107            | 1.30E-71  | 100        | 100               | AAO47557.1 |
| 165 | 80624      | 80866    | 80        |                                          |                                                                        |                   |           |            |                   |            |
| 86  | 80871      | 81341    | 156       |                                          |                                                                        |                   |           |            |                   |            |
| 191 | 81623      | 81823    | 66        |                                          |                                                                        |                   |           |            |                   |            |

Bacteriophage K (continued)

| ORF | Start (nt) | End (nt) | Size (aa) | Predicted Function                   | Representative similarity to proteins in database                      | Genbank gene name | E-value   | % Identity | % Length of Match | Accession  |
|-----|------------|----------|-----------|--------------------------------------|------------------------------------------------------------------------|-------------------|-----------|------------|-------------------|------------|
| 142 | 81824      | 82114    | 96        |                                      |                                                                        |                   |           |            |                   |            |
| 130 | 82206      | 82514    | 102       |                                      |                                                                        | ORF109            | 1.70E-51  | 100        | 100               | AAO47559.1 |
| 29  | 82511      | 83419    | 302       | Phosphoribosyl transferase           | phosphoribosyl transferase domain protein [S. oneidensis MR-1]         | ORF110            | 6.40E-16  | 30         | 79                | AAN55031.1 |
| 15  | 83437      | 84906    | 489       | Nicotinate phosphoribosyltransferase | putative nicotinamide phosphoribosyl transferase [H. ducreyi]          | ORF111            | 2.00E-138 | 53         | 98                | AAR87771.1 |
| 159 | 84985      | 85230    | 81        |                                      |                                                                        |                   |           |            |                   |            |
| 104 | 85247      | 85642    | 131       |                                      |                                                                        | ORF112            | 1.20E-69  | 100        | 100               | AAO47562.1 |
| 161 | 85639      | 85890    | 83        |                                      |                                                                        |                   |           |            |                   |            |
| 138 | 85955      | 86251    | 98        |                                      |                                                                        |                   |           |            |                   |            |
| 128 | 86255      | 86566    | 103       |                                      |                                                                        | ORF52             | 2.60E-52  | 100        | 100               | AAO47499.1 |
| 136 | 86572      | 86871    | 99        |                                      |                                                                        | ORF114            | 1.40E-53  | 100        | 100               | AAS91585.1 |
| 171 | 86950      | 87177    | 75        |                                      |                                                                        |                   | 5.50E-11  | 52         | 81                | AAO47545.1 |
| 171 | 86950      | 87177    | 75        | Major tail                           | phi12 major tail protein-like protein [S. aureus bacteriophage phi 3A] | ORF96             | 6.80E-09  | 47         | 85                | AAM49601.1 |
| 196 | 87205      | 87399    | 64        |                                      |                                                                        |                   |           |            |                   |            |
| 113 | 87418      | 87771    | 117       |                                      |                                                                        |                   |           |            |                   |            |
| 107 | 87790      | 88176    | 128       |                                      |                                                                        | ORF116            | 1.10E-70  | 100        | 100               | AAO47565.1 |
| 137 | 88858      | 89157    | 99        |                                      |                                                                        | ORF117            | 5.30E-05  | 35         | 100               | AAO47566.1 |
| 143 | 89465      | 89752    | 95        |                                      |                                                                        |                   |           |            |                   |            |
| 122 | 89752      | 90078    | 108       |                                      |                                                                        | ORF34             | 1.40E-55  | 100        | 100               | AAO47481.1 |
| 141 | 90094      | 90387    | 97        |                                      |                                                                        | ORF117            | 3.20E-05  | 34         | 100               | AAO47566.1 |
| 156 | 90391      | 90648    | 85        |                                      |                                                                        |                   |           |            |                   |            |
| 166 | 90726      | 90965    | 79        |                                      |                                                                        |                   |           |            |                   |            |
| 116 | 90976      | 91323    | 115       |                                      |                                                                        | ORF118            | 6.20E-64  | 100        | 100               | AAO47567.1 |
| 118 | 91870      | 91532    | 112       |                                      |                                                                        |                   |           |            |                   |            |
| 131 | 92181      | 92489    | 102       |                                      |                                                                        |                   |           |            |                   |            |
| 87  | 92574      | 93044    | 156       |                                      |                                                                        | ORF108            | 3.10E-82  | 100        | 100               | AAO47558.1 |
| 211 | 93103      | 93276    | 57        |                                      |                                                                        |                   |           |            |                   |            |
| 151 | 93276      | 93545    | 89        |                                      |                                                                        |                   |           |            |                   |            |
| 169 | 93621      | 93851    | 76        |                                      |                                                                        |                   |           |            |                   |            |
| 400 | 93925      | 94026    | 33        |                                      |                                                                        |                   |           |            |                   |            |
| 167 | 94384      | 94148    | 78        |                                      |                                                                        |                   |           |            |                   |            |
| 160 | 94818      | 94564    | 84        |                                      |                                                                        |                   |           |            |                   |            |
| 201 | 95012      | 94821    | 63        |                                      |                                                                        |                   |           |            |                   |            |

Bacteriophage K (continued)

| ORF | Start (nt) | End (nt) | Size (aa) | Predicted Function                            | Representative similarity to proteins in database                  | Genbank gene name | E-value   | % Identity | % Length of Match | Accession  |
|-----|------------|----------|-----------|-----------------------------------------------|--------------------------------------------------------------------|-------------------|-----------|------------|-------------------|------------|
| 82  | 95494      | 95009    | 161       |                                               |                                                                    | ORF1              | 6.60E-86  | 100        | 100               | AAO47447.1 |
| 98  | 95918      | 95487    | 143       |                                               |                                                                    | ORF2              | 4.80E-81  | 100        | 100               | AAO47448.1 |
| 71  | 96474      | 95932    | 180       |                                               |                                                                    | ORF3              | 1.00E-102 | 100        | 100               | AAO47449.1 |
| 81  | 96974      | 96486    | 162       | GTP cyclohydrolase                            | GTP cyclohydrolase II [V. vulnificus CMCP6]                        | ORF4              | 2.80E-07  | 26         | 91                | AAO08077.1 |
| 103 | 97385      | 96987    | 132       |                                               |                                                                    | ORF5              | 2.10E-74  | 100        | 100               | AAO47451.1 |
| 50  | 98089      | 97382    | 235       | Serine/threonine-specific protein phosphatase | serine/threonine protein phosphatase [C. burnetii RSA 493]         | ORF6              | 2.30E-14  | 27         | 94                | AAO90036.1 |
| 68  | 98743      | 98189    | 184       |                                               |                                                                    | ORF7              | 2.00E-103 | 100        | 100               | AAO47453.1 |
| 126 | 99076      | 98759    | 105       |                                               |                                                                    | ORF96             | 1.50E-07  | 41         | 82                | AAO47545.1 |
| 69  | 100610     | 100062   | 182       |                                               |                                                                    | ORF8              | 1.00E-101 | 100        | 100               | AAO47455.1 |
| 181 | 100832     | 100614   | 72        |                                               |                                                                    |                   |           |            |                   |            |
| 199 | 101027     | 100833   | 64        |                                               |                                                                    |                   |           |            |                   |            |
| 49  | 101754     | 101017   | 245       |                                               |                                                                    | ORF9              | 3.00E-137 | 100        | 100               | AAO47456.1 |
| 387 | 101921     | 101817   | 34        |                                               |                                                                    |                   |           |            |                   |            |
| 163 | 102181     | 101933   | 82        |                                               |                                                                    |                   |           |            |                   |            |
| 106 | 102563     | 102174   | 129       |                                               |                                                                    | ORF10             | 2.00E-72  | 100        | 100               | AAO47457.1 |
| 219 | 102835     | 102662   | 57        | Immunodominant antigen A                      | immunodominant antigen A [S. aureus subsp. aureus MSSA476]         |                   | 4.40E-06  | 40         | 92                | CAG44271.1 |
| 84  | 103358     | 102876   | 160       |                                               |                                                                    | ORF11             | 1.80E-88  | 100        | 100               | AAO47458.1 |
| 70  | 103950     | 103408   | 180       |                                               |                                                                    | ORF12             | 3.40E-98  | 100        | 100               | AAO47459.1 |
| 172 | 104083     | 104310   | 75        |                                               |                                                                    |                   |           |            |                   |            |
| 74  | 104483     | 103950   | 177       |                                               |                                                                    | ORF13             | 2.00E-100 | 100        | 100               | AAO47460.1 |
| 227 | 104650     | 104486   | 54        |                                               |                                                                    |                   |           |            |                   |            |
| 147 | 104928     | 104653   | 91        |                                               |                                                                    |                   |           |            |                   |            |
| 37  | 105773     | 104928   | 281       |                                               |                                                                    | ORF14             | 2.00E-158 | 100        | 100               | AAO47461.1 |
| 65  | 106369     | 105785   | 194       | AAA ATPase                                    | predicted AAA family ATPase [M. penetrans HF-2]                    | ORF15             | 9.70E-20  | 40         | 80                | BAC44370.1 |
| 148 | 106913     | 106638   | 91        |                                               |                                                                    |                   |           |            |                   |            |
| 124 | 107384     | 107058   | 108       |                                               |                                                                    |                   |           |            |                   |            |
| 100 | 107793     | 107377   | 138       |                                               |                                                                    | ORF16             | 1.20E-74  | 100        | 100               | AAO47463.1 |
| 135 | 108229     | 107927   | 100       | DNA-binding                                   | putative DNA-binding protein [S. thermophilus bacteriophage SFi18] | ORF17             | 1.90E-15  | 43         | 93                | AAF63096.1 |
| 204 | 108417     | 108229   | 62        |                                               |                                                                    |                   |           |            |                   |            |
| 230 | 108622     | 108461   | 53        |                                               |                                                                    |                   |           |            |                   |            |
| 7   | 110670     | 108622   | 682       |                                               |                                                                    | ORF18             | 0         | 100        | 100               | AAO47466.1 |
| 154 | 111011     | 110748   | 87        |                                               |                                                                    |                   |           |            |                   |            |

Bacteriophage K (continued)

| ORF | Start (nt) | End (nt) | Size (aa) | Predicted Function                                      | Representative similarity to proteins in database                                                                                                                                        | Genbank gene name | E-value                          | % Identity     | % Length of Match | Accession                              |
|-----|------------|----------|-----------|---------------------------------------------------------|------------------------------------------------------------------------------------------------------------------------------------------------------------------------------------------|-------------------|----------------------------------|----------------|-------------------|----------------------------------------|
| 66  | 111786     | 111208   | 192       |                                                         |                                                                                                                                                                                          | ORF19             | 6.00E-102                        | 100            | 100               | AAO47465.1                             |
| 59  | 112405     | 111779   | 208       |                                                         |                                                                                                                                                                                          | ORF20             | 1.00E-118                        | 100            | 100               | AAO47467.1                             |
| 31  | 113294     | 112398   | 298       | DNA ligase                                              | possible homolog of eukaryotic DNA ligase III [N. europaea ATCC 19718]                                                                                                                   | ORF21             | 2.80E-08                         | 28             | 59                | CAD85795.1                             |
| 48  | 114327     | 113587   | 246       | PhoH-like protein                                       | PhoH-related protein [N. meningitidis MC58]                                                                                                                                              | ORF22             | 5.10E-15                         | 35             | 75                | AAF41256.1                             |
| 61  | 114993     | 114379   | 204       |                                                         |                                                                                                                                                                                          | ORF23             | 2.00E-119                        | 100            | 100               | AAO47470.1                             |
| 91  | 115467     | 115009   | 152       | RNase H                                                 | RNase HI related protein [M. maripaludis S2]                                                                                                                                             | ORF24             | 6.60E-18                         | 37             | 90                | CAF30393.1                             |
| 203 | 115615     | 115424   | 63        |                                                         |                                                                                                                                                                                          |                   |                                  |                |                   |                                        |
| 55  | 116279     | 115638   | 213       |                                                         |                                                                                                                                                                                          | ORF25             | 1.00E-116                        | 100            | 100               | AAO47472.1                             |
| 170 | 116499     | 116269   | 76        | Transcription regulator                                 | transcription regulator (putative) [LactoB. plantarum WCFS1]                                                                                                                             |                   | 7.00E-06                         | 39             | 81                | CAD64381.1                             |
| 174 | 116729     | 116502   | 75        |                                                         |                                                                                                                                                                                          |                   |                                  |                |                   |                                        |
| 53  | 117531     | 116839   | 230       | Immunodominant antigen A                                | immunodominant antigen A [S. epidermidis ATCC 12228]                                                                                                                                     | ORF26             | 5.90E-15                         | 32             | 100               | AAO05768.1                             |
| 56  | 118353     | 117718   | 211       |                                                         |                                                                                                                                                                                          | ORF27             | 6.00E-125                        | 100            | 100               | AAO47474.1                             |
| 43  | 119211     | 118420   | 263       | B-cell receptor associated; Transposase; Band 7 protein | B-cell receptor associated protein-related protein [S. pyogenes SSI-1]<br>bacteriophage/transposase fusion protein [B. pseudomallei K96243]<br>Band 7 protein [P. marinus str. MIT 9313] | ORF28             | 6.50E-27<br>2.50E-18<br>1.20E-09 | 29<br>26<br>22 | 96<br>96<br>90    | BAC64245.1<br>CAH37855.1<br>CAE21083.1 |
| 132 | 119519     | 119211   | 102       |                                                         |                                                                                                                                                                                          | ORF29             | 3.70E-51                         | 100            | 100               | AAO47476.1                             |
| 58  | 120261     | 119632   | 209       | Amidase                                                 | amidase [S. aureus phage phi 11]                                                                                                                                                         | ORF30/ORF32       | 4.80E-55                         | 53             | 99                | AAL82281.1                             |
| 80  | 121032     | 120532   | 166       | HNH endonuclease; Intron encoded nuclease domain        | putative HNH homing endonuclease [bacteriophage bIL170]                                                                                                                                  | ORF31             | 3.50E-16                         | 34             | 96                | AAC27227.1                             |
| 41  | 121995     | 121192   | 267       | Amidase                                                 | N-acetylmuramoyl-L-alanine amidase [Staphylococcus phage Twort]                                                                                                                          | ORF30/ORF32       | 1.40E-48                         | 43             | 93                | CAA69021.1                             |
| 79  | 122498     | 121995   | 167       | Holin                                                   | holTW [Staphylococcus phage Twort]                                                                                                                                                       | ORF33             | 2.20E-42                         | 62             | 86                | CAA69020.1                             |
| 210 | 122768     | 122583   | 61        |                                                         |                                                                                                                                                                                          |                   |                                  |                |                   |                                        |
| 180 | 124533     | 124315   | 72        |                                                         |                                                                                                                                                                                          |                   |                                  |                |                   |                                        |
| 187 | 125220     | 125011   | 69        |                                                         |                                                                                                                                                                                          |                   |                                  |                |                   |                                        |
| 189 | 125439     | 125233   | 68        |                                                         |                                                                                                                                                                                          |                   |                                  |                |                   |                                        |
| 152 | 126464     | 126730   | 88        |                                                         |                                                                                                                                                                                          |                   |                                  |                |                   |                                        |
| 145 | 126708     | 126986   | 92        |                                                         |                                                                                                                                                                                          |                   |                                  |                |                   |                                        |
| 123 | 127067     | 127393   | 108       |                                                         |                                                                                                                                                                                          | ORF117            | 6.20E-59                         | 100            | 100               | AAO47566.1                             |

## Bacteriophage G1

| ORF | Start (nt) | End (nt) | Size (aa) | Predicted Function                           | Representative similarity to proteins in database                                                                                                                                        | E-value                                      | % Identity           | % Length of Match      | Accession                                            |
|-----|------------|----------|-----------|----------------------------------------------|------------------------------------------------------------------------------------------------------------------------------------------------------------------------------------------|----------------------------------------------|----------------------|------------------------|------------------------------------------------------|
| 10  | 13         | 1830     | 605       | Large terminase                              | large terminase [B. subtilis phage 1102phi1-3]                                                                                                                                           | 0                                            | 57                   | 94                     | AAS45252.1                                           |
| 40  | 1844       | 2644     | 266       |                                              | ORF36 [Staphylococcus phage K]                                                                                                                                                           | 4.00E-147                                    | 99                   | 100                    | AAS91583.1                                           |
| 235 | 2622       | 2804     | 60        |                                              |                                                                                                                                                                                          |                                              |                      |                        |                                                      |
| 91  | 2801       | 3280     | 159       |                                              | ORF37 [Staphylococcus phage K]                                                                                                                                                           | 1.20E-84                                     | 100                  | 100                    | AAO47483.1                                           |
| 23  | 3322       | 4521     | 399       | S-layer protein; Clumping factor; Structural | S-layer protein [C. thermocellum]<br>Clumping factor B [S. aureus subsp. aureus Mu50]<br>fibrinogen and keratin-10 binding surface anchored protein [S. aureus subsp. aureus MRSA252]    | 1.60E-15<br>3.10E-14<br>4.40E-13             | 27<br>30<br>29       | 59<br>33<br>33         | CAA47841.1<br>BAB58792.1<br>CAG41687.1               |
| 112 | 4124       | 4492     | 122       |                                              |                                                                                                                                                                                          |                                              |                      |                        |                                                      |
| 120 | 4598       | 4948     | 116       |                                              | ORF39 [Staphylococcus phage K]                                                                                                                                                           | 1.50E-57                                     | 99                   | 97                     | AAO47486.1                                           |
| 115 | 4966       | 5337     | 123       |                                              | ORF40 [Staphylococcus phage K]                                                                                                                                                           | 9.80E-67                                     | 99                   | 100                    | AAO47487.1                                           |
| 14  | 5341       | 7032     | 563       | Portal                                       | phage portal protein, HK97 family [Wolbachia endosymbiont of Drosophila melanogaster]                                                                                                    | 2.40E-05                                     | 23                   | 39                     | AAS14672.1                                           |
| 48  | 7226       | 7999     | 257       | Major capsid                                 | ORF42 [Staphylococcus phage K]                                                                                                                                                           | 2.00E-143                                    | 100                  | 100                    | AAO47489.1                                           |
| 29  | 8018       | 8974     | 318       | Topoisomerase; Autolysin; Internalin         | DNA topoisomerase IV subunit A [M. penetrans HF-2]<br>putative autolysin [S. cohnii]<br>fimbriae-associated protein Fap1 [S. parasanguinis]<br>Internalin protein [B. cereus ATCC 14579] | 3.30E-18<br>5.90E-15<br>8.50E-14<br>4.60E-12 | 23<br>19<br>24<br>24 | 100<br>100<br>89<br>81 | BAC44437.1<br>CAC83649.1<br>AAC79868.1<br>AAP07572.1 |
| 16  | 9090       | 10481    | 463       | Major capsid                                 | major capsid protein [Staphylococcus phage Twort]                                                                                                                                        | 0                                            | 82                   | 98                     | AAQ62708.1                                           |
| 151 | 10573      | 10869    | 98        |                                              |                                                                                                                                                                                          |                                              |                      |                        |                                                      |
| 30  | 10882      | 11790    | 302       |                                              | ORF45 [Staphylococcus phage K]                                                                                                                                                           | 5.00E-179                                    | 100                  | 100                    | AAO47492.1                                           |
| 34  | 11804      | 12682    | 292       |                                              | ORF46 [Staphylococcus phage K]                                                                                                                                                           | 1.00E-170                                    | 100                  | 100                    | AAO47493.1                                           |
| 62  | 12682      | 13302    | 206       |                                              | ORF47 [Staphylococcus phage K]                                                                                                                                                           | 1.00E-115                                    | 100                  | 100                    | AAO47494.1                                           |
| 39  | 13321      | 14157    | 278       |                                              | ORF48 [Staphylococcus phage K]                                                                                                                                                           | 1.00E-156                                    | 100                  | 100                    | AAO47495.1                                           |
| 202 | 14159      | 14374    | 71        |                                              | ORF7 [Bacteriophage A511]                                                                                                                                                                | 1.00E-12                                     | 48                   | 100                    | CAA62545.1                                           |
| 11  | 14401      | 16164    | 587       | Major tail                                   | major tail sheath protein [Bacteriophage A511]                                                                                                                                           | 0                                            | 58                   | 100                    | CAA62546.1                                           |
| 105 | 16237      | 16665    | 142       |                                              | ORF50 [Staphylococcus phage K]                                                                                                                                                           | 1.60E-76                                     | 100                  | 100                    | AAO47497.1                                           |
| 293 | 16762      | 16902    | 46        |                                              |                                                                                                                                                                                          |                                              |                      |                        |                                                      |
| 93  | 16945      | 17403    | 152       |                                              | ORF51 [Staphylococcus phage K]                                                                                                                                                           | 4.80E-85                                     | 100                  | 100                    | AAO47498.1                                           |
| 215 | 17416      | 17610    | 64        |                                              |                                                                                                                                                                                          |                                              |                      |                        |                                                      |
| 141 | 17692      | 18003    | 103       |                                              | ORF52 [Staphylococcus phage K]                                                                                                                                                           | 2.60E-52                                     | 100                  | 100                    | AAO47499.1                                           |
| 95  | 18135      | 18593    | 152       |                                              | ORF53 [Staphylococcus phage K]                                                                                                                                                           | 5.30E-84                                     | 100                  | 100                    | AAO47500.1                                           |
| 95  | 18135      | 18593    | 152       |                                              | ORF9 [Bacteriophage A511]                                                                                                                                                                | 1.40E-28                                     | 40                   | 97                     | CAA62548.1                                           |

Bacteriophage G1 (continued)

| ORF | Start (nt) | End (nt) | Size (aa) | Predicted Function                                  | Representative similarity to proteins in database                                         | E-value   | % Identity | % Length of Match | Accession  |
|-----|------------|----------|-----------|-----------------------------------------------------|-------------------------------------------------------------------------------------------|-----------|------------|-------------------|------------|
| 74  | 18637      | 19173    | 178       |                                                     | ORF54 [Staphylococcus phage K]                                                            | 2.00E-101 | 100        | 100               | AAO47501.1 |
| 1   | 19226      | 23284    | 1352      | Tape measure protein                                | tail tape measure protein [P. syringae pv. tomato str. DC3000]                            | 5.50E-17  | 23         | 63                | AAO56871.1 |
| 311 | 21441      | 21575    | 44        |                                                     |                                                                                           |           |            |                   |            |
| 285 | 21579      | 21722    | 47        |                                                     |                                                                                           |           |            |                   |            |
| 5   | 23363      | 25789    | 808       | Amidase; Secretory antigen                          | secretory antigen SsaA-like protein [S. epidermidis ATCC 12228]                           | 2.40E-33  | 49         | 20                | AAO05088.1 |
|     |            |          |           |                                                     | N-acetylmuramoyl-L-alanine amidase, family 4 [E. faecalis V583]                           | 2.80E-13  | 28         | 39                |            |
| 33  | 25803      | 26690    | 295       |                                                     | ORF57 [Staphylococcus phage K]                                                            | 5.00E-172 | 100        | 100               | AAO47506.1 |
| 4   | 26690      | 29236    | 848       | Glycerophosphoryl diester phosphodiesterase         | glycerophosphoryl diester phosphodiesterase [B. subtilis]                                 | 7.30E-41  | 38         | 29                | CAA81292.1 |
| 43  | 29343      | 30134    | 263       |                                                     | ORF59 [Staphylococcus phage K]                                                            | 4.00E-149 | 100        | 100               | AAO47508.1 |
| 78  | 30134      | 30658    | 174       |                                                     | ORF60 [Staphylococcus phage K]                                                            | 7.90E-94  | 99         | 100               | AAO47509.1 |
| 52  | 30658      | 31362    | 234       | LysM domain                                         | ORF61 [Staphylococcus phage K]                                                            | 3.00E-131 | 100        | 100               | AAO47510.1 |
| 27  | 31377      | 32423    | 348       |                                                     | ORF62 [Staphylococcus phage K]                                                            | 0         | 100        | 100               | AAS91584.1 |
| 3   | 32444      | 35503    | 1019      |                                                     | ORF63 [Staphylococcus phage K]                                                            | 0         | 100        | 100               | AAO47511.1 |
| 79  | 35614      | 36135    | 173       |                                                     | ORF64 [Staphylococcus phage K]                                                            | 7.10E-95  | 100        | 100               | AAO47512.1 |
| 2   | 36156      | 39614    | 1152      | Virulence-associated                                | Virulence-associated protein [B. henselae str. Houston-1]                                 | 4.60E-65  | 25         | 100               | CAF27126.1 |
| 262 | 39663      | 39821    | 52        |                                                     |                                                                                           |           |            |                   |            |
| 8   | 39822      | 41744    | 640       |                                                     | ORF66 [Staphylococcus phage K]                                                            | 0         | 100        | 100               | AAO47515.1 |
| 117 | 41767      | 42141    | 124       |                                                     | ORF67 [Staphylococcus phage K]                                                            | 2.00E-67  | 100        | 100               | AAO47516.1 |
| 17  | 42148      | 43524    | 458       |                                                     | ORF68 [Staphylococcus phage K]                                                            | 0         | 100        | 100               | AAO47517.1 |
| 12  | 43616      | 45364    | 582       | Type III restriction enzyme; DEAD/DEAH box helicase | putative helicase [S. enterica subsp. enterica serovar Typhi str. CT18]                   | 9.30E-37  | 33         | 48                | CAD09945.1 |
| 13  | 45376      | 46989    | 537       |                                                     | ORF70 [Staphylococcus phage K]                                                            | 0         | 100        | 100               | AAO47519.1 |
| 15  | 46982      | 48424    | 480       | AAA ATPase                                          | gp41 DNA primase-helicase subunit [Aeromonas phage 65]                                    | 2.40E-16  | 23         | 92                | AAR90925.1 |
| 28  | 48503      | 49540    | 345       | Exonuclease                                         | ATP-dependent dsDNA exonuclease [Aquifex aeolicus VF5]                                    | 6.80E-12  | 23         | 100               | AAC07689.1 |
| 110 | 49540      | 49917    | 125       |                                                     | ORF73 [Staphylococcus phage K]                                                            | 1.00E-71  | 100        | 100               | AAO47522.1 |
| 9   | 49917      | 51836    | 639       | Exonuclease                                         | putative exonuclease [Yersinia pestis KIM]                                                | 1.30E-55  | 25         | 100               | AAC82670.1 |
| 67  | 51836      | 52432    | 198       |                                                     | ORF75 [Staphylococcus phage K]                                                            | 4.00E-111 | 100        | 100               | AAO47524.1 |
| 26  | 52447      | 53514    | 355       | DNA primase                                         | DNA primase (bacterial type) [Thermoanaerobacter tengcongensis MB4]                       | 9.00E-15  | 26         | 100               | AAM24950.1 |
| 127 | 53581      | 53919    | 112       |                                                     |                                                                                           |           |            |                   |            |
| 98  | 53919      | 54371    | 150       | Penicillin-binding                                  | penicillin-binding protein [B. thuringiensis serovar konkukian str. 97-27]                | 4.70E-05  | 30         | 83                | AAT63192.1 |
| 64  | 54358      | 54966    | 202       |                                                     | ORF78 [Staphylococcus phage K]                                                            | 6.00E-118 | 100        | 100               | AAO47527.1 |
| 102 | 54983      | 55375    | 130       | Ribonucleotide reductase; NrdI                      | NrdI protein involved in ribonucleotide reductase function [S. aureus subsp. aureus Mu50] | 1.40E-14  | 35         | 83                | BAB56892.1 |

Bacteriophage G1 (continued)

| ORF | Start (nt) | End (nt) | Size (aa) | Predicted Function                                                  | Representative similarity to proteins in database                              | E-value   | % Identity | % Length of Match | Accession  |
|-----|------------|----------|-----------|---------------------------------------------------------------------|--------------------------------------------------------------------------------|-----------|------------|-------------------|------------|
| 6   | 55390      | 57504    | 704       | Ribonucleotide reductase large subunit                              | large subunit ribonucleotide reductase [Staphylococcus phage Twort]            | 0         | 73         | 100               | AAM00816.1 |
| 25  | 57770      | 58567    | 265       | Ribonucleotide reductase minor subunit                              | ribonucleoside-diphosphate reductase minor subunit [S. epidermidis ATCC 12228] | 5.30E-69  | 54         | 95                | AAO04111.1 |
| 130 | 58585      | 58914    | 109       |                                                                     | ORF82 [Staphylococcus phage K]                                                 | 4.40E-57  | 100        | 100               | AAO47531.1 |
| 129 | 58907      | 59218    | 103       |                                                                     | ORF83 [Staphylococcus phage K]                                                 | 2.00E-52  | 100        | 100               | AAO47532.1 |
| 66  | 59425      | 60021    | 198       |                                                                     | ORF84 [Staphylococcus phage K]                                                 | 1.00E-111 | 100        | 100               | AAO47533.1 |
| 147 | 60031      | 60336    | 101       | Integration host factor; Histone-like bacterial DNA-binding protein | putative integration host factor [Parachlamydia sp. UWE25]                     | 2.80E-06  | 31         | 93                | CAF23892.1 |
| 35  | 60412      | 61284    | 290       | DNA polymerase                                                      | ORF86/ORF88/ORF90 [Staphylococcus phage K]                                     | 8.00E-168 | 100        | 100               | AAO47535.1 |
| 81  | 61450      | 61962    | 170       |                                                                     | ORF87 [Staphylococcus phage K]                                                 | 1.90E-92  | 100        | 91                | AAO47536.1 |
| 19  | 62098      | 63441    | 447       | DNA polymerase I                                                    | DNA polymerase [Bacteriophage Bastille]                                        | 3.10E-34  | 39         | 47                | AAO93094.1 |
| 388 | 63002      | 63112    | 36        |                                                                     |                                                                                |           |            |                   |            |
| 41  | 63709      | 64416    | 235       | HNH endonuclease                                                    | putative HNH homing endonuclease [bacteriophage bIL170]                        | 5.60E-24  | 38         | 72                | AAC27227.1 |
| 37  | 64650      | 65510    | 286       | DNA-directed DNA polymerase                                         | DNA polymerase I [T. thermosulfurigenes]                                       | 6.90E-33  | 34         | 79                | AAR11873.1 |
| 181 | 65579      | 65821    | 80        |                                                                     |                                                                                |           |            |                   |            |
| 89  | 65838      | 66320    | 160       |                                                                     | ORF91 [Staphylococcus phage K]                                                 | 7.00E-88  | 100        | 100               | AAO47540.1 |
| 20  | 66407      | 67678    | 423       |                                                                     | ORF92 [Staphylococcus phage K]                                                 | 0         | 100        | 100               | AAO47541.1 |
| 21  | 67738      | 68994    | 418       | RecA bacterial DNA recombination protein                            | recA protein [P. gingivalis W83]                                               | 7.50E-27  | 29         | 81                | AAQ66027.1 |
| 121 | 68998      | 69351    | 117       |                                                                     |                                                                                |           |            |                   |            |
| 56  | 69338      | 70000    | 220       | RNA polymerase sigma                                                | ORF94 [Staphylococcus phage K]                                                 | 1.00E-124 | 100        | 100               | AAO47543.1 |
| 59  | 70128      | 70760    | 210       |                                                                     | ORF95 [Staphylococcus phage K]                                                 | 5.00E-118 | 100        | 100               | AAO47544.1 |
| 80  | 70783      | 71295    | 170       | Major tail                                                          | phi12 major tail protein-like protein [S. aureus bacteriophage phi 3A]         | 1.70E-21  | 40         | 79                | AAM49601.1 |
| 189 | 71310      | 71537    | 75        | Major tail                                                          | phi12 major tail protein-like protein [S. aureus bacteriophage phi 3A]         | 6.80E-09  | 47         | 85                | AAM49601.1 |
| 174 | 71633      | 71893    | 86        |                                                                     |                                                                                |           |            |                   |            |
| 46  | 71897      | 72652    | 251       |                                                                     | ORF97 [Staphylococcus phage K]                                                 | 1.00E-144 | 100        | 100               | AAO47546.1 |
| 22  | 72645      | 73895    | 416       | Metallophosphoesterase                                              | ORF98 [Staphylococcus phage K]                                                 | 0         | 100        | 100               | AAO47547.1 |
| 118 | 73909      | 74277    | 122       |                                                                     | ORF99 [Staphylococcus phage K]                                                 | 1.30E-63  | 100        | 100               | AAO47548.1 |
| 143 | 74264      | 74575    | 103       |                                                                     | ORF100 [Staphylococcus phage K]                                                | 2.50E-55  | 100        | 100               | AAO47549.1 |
| 75  | 74639      | 75175    | 178       |                                                                     |                                                                                |           |            |                   |            |
| 45  | 75168      | 75935    | 255       |                                                                     | ORF101 [Staphylococcus phage K]                                                | 4.00E-150 | 100        | 100               | AAO47550.1 |
| 99  | 75913      | 76359    | 148       |                                                                     | ORF102 [Staphylococcus phage K]                                                | 1.40E-80  | 100        | 100               | AAO47551.1 |
| 36  | 76359      | 77222    | 287       |                                                                     |                                                                                |           |            |                   |            |
| 47  | 77594      | 78325    | 243       |                                                                     | ORF103 [Staphylococcus phage K]                                                | 2.00E-133 | 100        | 100               | AAO47553.1 |
| 94  | 78343      | 78801    | 152       |                                                                     | ORF104 [Staphylococcus phage K]                                                | 7.60E-83  | 99         | 100               | AAO47554.1 |

Bacteriophage G1 (continued)

| ORF | Start (nt) | End (nt) | Size (aa) | Predicted Function         | Representative similarity to proteins in database              | E-value   | % Identity | % Length of Match | Accession  |
|-----|------------|----------|-----------|----------------------------|----------------------------------------------------------------|-----------|------------|-------------------|------------|
| 100 | 78866      | 79309    | 147       |                            | ORF105 [Staphylococcus phage K]                                | 9.20E-80  | 100        | 100               | AAO47555.1 |
| 53  | 79326      | 80030    | 234       |                            | ORF106 [Staphylococcus phage K]                                | 5.00E-132 | 100        | 100               | AAO47556.1 |
| 108 | 80092      | 80490    | 132       |                            | ORF107 [Staphylococcus phage K]                                | 1.30E-71  | 100        | 100               | AAO47557.1 |
| 182 | 80637      | 80879    | 80        |                            |                                                                |           |            |                   |            |
| 252 | 80884      | 81048    | 54        |                            | ORF108 [Staphylococcus phage K]                                | 3.10E-23  | 100        | 100               | AAO47558.1 |
| 240 | 81250      | 81426    | 58        |                            |                                                                |           |            |                   |            |
| 76  | 81416      | 81949    | 177       |                            |                                                                |           |            |                   |            |
| 241 | 82120      | 82296    | 58        |                            |                                                                |           |            |                   |            |
| 152 | 82289      | 82585    | 98        |                            |                                                                |           |            |                   |            |
| 219 | 82633      | 82815    | 60        |                            |                                                                |           |            |                   |            |
| 119 | 82828      | 83196    | 122       |                            |                                                                |           |            |                   |            |
| 124 | 83209      | 83556    | 115       |                            |                                                                |           |            |                   |            |
| 162 | 83556      | 83834    | 92        |                            |                                                                |           |            |                   |            |
| 140 | 83904      | 84209    | 101       |                            |                                                                |           |            |                   |            |
| 122 | 84224      | 84574    | 116       |                            | unknown [S. aureus subsp. aureus MSSA476]                      | 2.20E-05  | 28         | 98                | CAG42397.1 |
| 65  | 84574      | 85176    | 200       |                            |                                                                |           |            |                   |            |
| 237 | 85190      | 85369    | 59        |                            |                                                                |           |            |                   |            |
| 107 | 85596      | 85997    | 133       |                            |                                                                |           |            |                   |            |
| 173 | 85999      | 86259    | 86        |                            |                                                                |           |            |                   |            |
| 333 | 86190      | 86294    | 34        |                            |                                                                |           |            |                   |            |
| 157 | 86311      | 86598    | 95        |                            |                                                                |           |            |                   |            |
| 362 | 86609      | 86725    | 38        |                            |                                                                |           |            |                   |            |
| 170 | 86715      | 86978    | 87        |                            |                                                                |           |            |                   |            |
| 236 | 87055      | 87234    | 59        |                            |                                                                |           |            |                   |            |
| 171 | 87249      | 87512    | 87        |                            |                                                                |           |            |                   |            |
| 137 | 87515      | 87832    | 105       |                            |                                                                |           |            |                   |            |
| 55  | 87833      | 88513    | 226       |                            | ORF108 [Staphylococcus phage K]                                | 2.20E-06  | 100        | 11                | AAO47558.1 |
| 216 | 87849      | 87655    | 64        |                            |                                                                |           |            |                   |            |
| 263 | 88602      | 88760    | 52        |                            |                                                                |           |            |                   |            |
| 211 | 88795      | 88995    | 66        |                            |                                                                |           |            |                   |            |
| 155 | 88996      | 89286    | 96        |                            |                                                                |           |            |                   |            |
| 144 | 89378      | 89686    | 102       |                            | ORF109 [Staphylococcus phage K]                                | 1.70E-51  | 100        | 100               | AAO47559.1 |
| 31  | 89683      | 90591    | 302       | Phosphoribosyl transferase | phosphoribosyl transferase domain protein [S. oneidensis MR-1] | 6.40E-16  | 30         | 79                | AAN55031.1 |



Bacteriophage G1 (continued)

| ORF | Start (nt) | End (nt) | Size (aa) | Predicted Function                   | Representative similarity to proteins in database             | E-value   | % Identity | % Length of Match | Accession  |
|-----|------------|----------|-----------|--------------------------------------|---------------------------------------------------------------|-----------|------------|-------------------|------------|
| 18  | 90609      | 91973    | 454       | Nicotinate phosphoribosyltransferase | putative nicotinamide phosphoribosyl transferase [H. ducreyi] | 3.00E-134 | 54         | 99                | AAR87771.1 |
| 178 | 92157      | 92402    | 81        |                                      |                                                               |           |            |                   |            |
| 113 | 92422      | 92814    | 130       |                                      | ORF112 [Staphylococcus phage K]                               | 9.80E-64  | 91         | 99                | AAO47562.1 |
| 194 | 92816      | 93037    | 73        |                                      |                                                               |           |            |                   |            |
| 142 | 93103      | 93414    | 103       |                                      | ORF113 [Staphylococcus phage K]                               | 5.90E-49  | 86         | 100               | AAO47563.1 |
| 82  | 93417      | 93926    | 169       |                                      |                                                               |           |            |                   |            |
| 131 | 93928      | 94257    | 109       |                                      |                                                               |           |            |                   |            |
| 139 | 94451      | 94765    | 104       |                                      |                                                               |           |            |                   |            |
| 225 | 94780      | 94947    | 55        |                                      |                                                               |           |            |                   |            |
| 445 | 94984      | 95085    | 33        |                                      |                                                               |           |            |                   |            |
| 150 | 96032      | 96331    | 99        |                                      | ORF117 [Staphylococcus phage K]                               | 5.30E-05  | 35         | 100               | AAO47566.1 |
| 231 | 96347      | 96532    | 61        |                                      |                                                               |           |            |                   |            |
| 156 | 96639      | 96929    | 96        |                                      |                                                               |           |            |                   |            |
| 158 | 96929      | 97216    | 95        |                                      |                                                               |           |            |                   |            |
| 154 | 97216      | 97509    | 97        |                                      | ORF117 [Staphylococcus phage K]                               | 3.20E-05  | 34         | 100               | AAO47566.1 |
| 175 | 97513      | 97770    | 85        |                                      |                                                               |           |            |                   |            |
| 183 | 97848      | 98087    | 79        |                                      |                                                               |           |            |                   |            |
| 125 | 98098      | 98445    | 115       |                                      | ORF118 [Staphylococcus phage K]                               | 6.20E-64  | 100        | 100               | AAO47567.1 |
| 128 | 98992      | 98654    | 112       |                                      |                                                               |           |            |                   |            |
| 145 | 99303      | 99611    | 102       |                                      |                                                               |           |            |                   |            |
| 159 | 99817      | 100101   | 94        |                                      |                                                               |           |            |                   |            |
| 221 | 100176     | 100367   | 63        |                                      |                                                               |           |            |                   |            |
| 312 | 100576     | 100442   | 44        |                                      |                                                               |           |            |                   |            |
| 85  | 101172     | 100684   | 162       | HNH endonuclease                     | putative HNH endonuclease [Enterobacteria phage T1]           | 8.20E-07  | 35         | 53                | AAP49937.1 |
| 297 | 101568     | 101699   | 43        |                                      |                                                               |           |            |                   |            |
| 135 | 101867     | 102190   | 107       |                                      |                                                               |           |            |                   |            |
| 92  | 102616     | 103086   | 156       |                                      |                                                               |           |            |                   |            |
| 234 | 103145     | 103318   | 57        |                                      |                                                               |           |            |                   |            |
| 166 | 103318     | 103587   | 89        |                                      |                                                               |           |            |                   |            |
| 247 | 103386     | 103216   | 56        |                                      |                                                               |           |            |                   |            |
| 226 | 103672     | 103851   | 59        |                                      |                                                               |           |            |                   |            |
| 450 | 103935     | 104036   | 33        |                                      |                                                               |           |            |                   |            |
| 184 | 104421     | 104185   | 78        |                                      |                                                               |           |            |                   |            |

Bacteriophage G1 (continued)

| ORF | Start (nt) | End (nt) | Size (aa) | Predicted Function                            | Representative similarity to proteins in database                                             | E-value   | % Identity | % Length of Match | Accession  |
|-----|------------|----------|-----------|-----------------------------------------------|-----------------------------------------------------------------------------------------------|-----------|------------|-------------------|------------|
| 88  | 104908     | 104423   | 161       |                                               |                                                                                               |           |            |                   |            |
| 109 | 105328     | 104921   | 135       |                                               |                                                                                               |           |            |                   |            |
| 103 | 105759     | 105328   | 143       |                                               |                                                                                               |           |            |                   |            |
| 224 | 105953     | 105762   | 63        |                                               |                                                                                               |           |            |                   |            |
| 87  | 106435     | 105950   | 161       |                                               | ORF1 [Staphylococcus phage K]                                                                 | 3.60E-84  | 99         | 100               | AAO47447.1 |
| 104 | 106859     | 106428   | 143       |                                               | ORF2 [Staphylococcus phage K]                                                                 | 4.80E-81  | 100        | 100               | AAO47448.1 |
| 73  | 107415     | 106873   | 180       |                                               | ORF3 [Staphylococcus phage K]                                                                 | 4.00E-102 | 99         | 100               | AAO47449.1 |
| 86  | 107915     | 107427   | 162       | GTP cyclohydrolase                            | GTP cyclohydrolase II [V. vulnificus CMCP6]                                                   | 2.80E-07  | 26         | 91                | AAO08077.1 |
| 111 | 108326     | 107928   | 132       |                                               | ORF5 [Staphylococcus phage K]                                                                 | 2.10E-74  | 100        | 100               | AAO47451.1 |
| 51  | 109030     | 108323   | 235       | Serine/threonine-specific protein phosphatase | serine/threonine protein phosphatase [C. burnetii RSA 493]                                    | 1.20E-13  | 27         | 94                | AAO90036.1 |
| 70  | 109684     | 109130   | 184       |                                               | ORF7 [Staphylococcus phage K]                                                                 | 2.00E-103 | 100        | 100               | AAO47453.1 |
| 138 | 110017     | 109700   | 105       |                                               | ORF96 [Staphylococcus phage K]                                                                | 1.50E-07  | 41         | 82                | AAO47545.1 |
| 71  | 111551     | 111003   | 182       |                                               | ORF8 [Staphylococcus phage K]                                                                 | 1.00E-101 | 100        | 100               | AAO47455.1 |
| 201 | 111773     | 111555   | 72        |                                               |                                                                                               |           |            |                   |            |
| 218 | 111968     | 111774   | 64        |                                               |                                                                                               |           |            |                   |            |
| 50  | 112695     | 111958   | 245       |                                               | ORF9 [Staphylococcus phage K]                                                                 | 3.00E-137 | 100        | 100               | AAO47456.1 |
| 437 | 112862     | 112758   | 34        |                                               |                                                                                               |           |            |                   |            |
| 180 | 113113     | 112874   | 79        |                                               |                                                                                               |           |            |                   |            |
| 114 | 113504     | 113115   | 129       |                                               | ORF10 [Staphylococcus phage K]                                                                | 2.00E-72  | 100        | 100               | AAO47457.1 |
| 245 | 113776     | 113603   | 57        | Immunodominant antigen A                      | immunodominant antigen A [S. aureus subsp. aureus MSSA476]                                    | 4.40E-06  | 40         | 92                | CAG44271.1 |
| 90  | 114299     | 113817   | 160       |                                               | ORF11 [Staphylococcus phage K]                                                                | 1.80E-88  | 100        | 100               | AAO47458.1 |
| 72  | 114891     | 114349   | 180       |                                               | ORF12 [Staphylococcus phage K]                                                                | 3.40E-98  | 100        | 100               | AAO47459.1 |
| 77  | 115424     | 114891   | 177       |                                               | ORF13 [Staphylococcus phage K]                                                                | 2.00E-100 | 100        | 100               | AAO47460.1 |
| 256 | 115591     | 115427   | 54        |                                               |                                                                                               |           |            |                   |            |
| 163 | 115869     | 115594   | 91        |                                               |                                                                                               |           |            |                   |            |
| 38  | 116714     | 115869   | 281       |                                               | ORF14 [Staphylococcus phage K]                                                                | 2.00E-158 | 100        | 100               | AAO47461.1 |
| 24  | 117844     | 116726   | 372       | Nitric oxide reductase                        | nitric-oxide reductase [S. epidermidis ATCC 12228]                                            | 3.30E-07  | 26         | 71                | AAO04689.1 |
| 24  | 117844     | 116726   | 372       | Porphyrin biosynthesis                        | putative porphyrin biosynthetic protein [S. enterica subsp. enterica serovar Typhi str. CT18] | 5.70E-07  | 24         | 70                | CAD09883.1 |
| 134 | 118324     | 117998   | 108       |                                               |                                                                                               |           |            |                   |            |
| 106 | 118733     | 118317   | 138       |                                               | ORF16 [Staphylococcus phage K]                                                                | 1.20E-74  | 100        | 100               | AAO47463.1 |
| 149 | 119169     | 118867   | 100       | DNA-binding                                   | putative DNA-binding protein [S. thermophilus bacteriophage SFi18]                            | 1.90E-15  | 43         | 93                | AAF63096.1 |
| 228 | 119357     | 119169   | 62        |                                               |                                                                                               |           |            |                   |            |
| 259 | 119562     | 119401   | 53        |                                               |                                                                                               |           |            |                   |            |

Bacteriophage G1 (continued)

| ORF | Start (nt) | End (nt) | Size (aa) | Predicted Function                               | Representative similarity to proteins in database                      | E-value   | % Identity | % Length of Match | Accession  |
|-----|------------|----------|-----------|--------------------------------------------------|------------------------------------------------------------------------|-----------|------------|-------------------|------------|
| 309 | 121318     | 121181   | 45        |                                                  |                                                                        |           |            |                   |            |
| 7   | 121610     | 119562   | 682       |                                                  | ORF18 [Staphylococcus phage K]                                         | 0         | 100        | 100               | AAO47466.1 |
| 172 | 121951     | 121688   | 87        |                                                  |                                                                        |           |            |                   |            |
| 68  | 122726     | 122148   | 192       |                                                  | ORF19 [Staphylococcus phage K]                                         | 6.00E-102 | 100        | 100               | AAO47465.1 |
| 61  | 123345     | 122719   | 208       |                                                  | ORF20 [Staphylococcus phage K]                                         | 1.00E-118 | 100        | 100               | AAO47467.1 |
| 32  | 124234     | 123338   | 298       | DNA ligase/mRNA capping enzyme                   | possible homolog of eukaryotic DNA ligase III [N. europaea ATCC 19718] | 2.80E-08  | 28         | 59                | CAD85795.1 |
| 49  | 125267     | 124527   | 246       | PhoH-like protein                                | PhoH-related protein [N. meningitidis MC58]                            | 5.10E-15  | 35         | 75                | AAF41256.1 |
| 63  | 125933     | 125319   | 204       |                                                  | ORF23 [Staphylococcus phage K]                                         | 2.00E-119 | 100        | 100               | AAO47470.1 |
| 96  | 126374     | 125949   | 141       | RNase H                                          | RNase HI related protein [M. maripaludis S2]                           | 3.40E-18  | 37         | 97                | CAF30393.1 |
| 222 | 126555     | 126364   | 63        |                                                  |                                                                        |           |            |                   |            |
| 57  | 127219     | 126578   | 213       |                                                  | ORF25 [Staphylococcus phage K]                                         | 1.00E-116 | 100        | 100               | AAO47472.1 |
| 187 | 127439     | 127209   | 76        | Helix-turn-helix motif                           | transcription regulator (putative) [LactoB. plantarum WCFS1]           | 7.00E-06  | 39         | 81                | CAD64381.1 |
| 190 | 127669     | 127442   | 75        |                                                  |                                                                        |           |            |                   |            |
| 54  | 128471     | 127779   | 230       | Transglycosylase-like; Immunodominant antigen A  | immunodominant antigen A [S. epidermidis ATCC 12228]                   | 5.90E-15  | 32         | 100               | AAO05768.1 |
| 58  | 129293     | 128658   | 211       |                                                  | ORF27 [Staphylococcus phage K]                                         | 6.00E-125 | 100        | 100               | AAO47474.1 |
| 44  | 130151     | 129360   | 263       | Prohibitin; Band 7 protein                       | B-cell receptor associated protein-related protein [S. pyogenes SSI-1] | 6.50E-27  | 29         | 96                | BAC64245.1 |
|     |            |          |           |                                                  | Band 7 protein [P. marinus str. MIT 9313]                              | 1.20E-09  | 22         | 90                | CAE21083.1 |
| 146 | 130459     | 130151   | 102       |                                                  | ORF29 [Staphylococcus phage K]                                         | 3.70E-51  | 100        | 100               | AAO47476.1 |
| 60  | 131201     | 130572   | 209       | Amidase                                          | amidase [S. aureus phage phi 11]                                       | 4.80E-55  | 53         | 99                | AAL82281.1 |
| 84  | 131972     | 131472   | 166       | HNH endonuclease; Intron encoded nuclease domain | putative HNH homing endonuclease [bacteriophage bIL170]                | 3.50E-16  | 34         | 96                | AAC27227.1 |
| 42  | 132935     | 132132   | 267       | Amidase                                          | N-acetylmuramoyl-L-alanine amidase [Staphylococcus phage Twort]        | 1.40E-48  | 43         | 93                | CAA69021.1 |
| 83  | 133438     | 132935   | 167       | Holin                                            | holTW [Staphylococcus phage Twort]                                     | 2.20E-42  | 62         | 86                | CAA69020.1 |
| 233 | 133708     | 133523   | 61        |                                                  |                                                                        |           |            |                   |            |
| 200 | 135473     | 135255   | 72        |                                                  |                                                                        |           |            |                   |            |
| 207 | 136540     | 136331   | 69        |                                                  |                                                                        |           |            |                   |            |
| 209 | 136885     | 136553   | 110       |                                                  |                                                                        |           |            |                   |            |
| 169 | 137523     | 137257   | 88        |                                                  |                                                                        |           |            |                   |            |
| 168 | 137664     | 138050   | 128       |                                                  |                                                                        |           |            |                   |            |
| 161 | 138028     | 138306   | 92        |                                                  |                                                                        |           |            |                   |            |
| 133 | 138303     | 138713   | 136       |                                                  | ORF34 [Staphylococcus phage K]                                         | 1.20E-55  | 100        | 79                | AAO47481.1 |

## Bacteriophage Twort

| ORF | Start (nt) | End (nt) | Size (aa) | Predicted Function                                                 | Representative similarity to proteins in database                             | E-value   | % Identity | % Length of Match | Accession  |
|-----|------------|----------|-----------|--------------------------------------------------------------------|-------------------------------------------------------------------------------|-----------|------------|-------------------|------------|
| 97  | 764        | 1165     | 133       | Group I Intron                                                     | group I intron [Bacteriophage Tuc2009]                                        | 1.10E-11  | 35         | 92                | AAK19864.1 |
| 36  | 1284       | 2144     | 286       | Large terminase                                                    | large terminase [B. subtilis phage 1102phi1-3]                                | 3.30E-67  | 49         | 89                | AAS45252.1 |
| 39  | 2157       | 2948     | 263       |                                                                    | ORF36 [Staphylococcus phage K]                                                | 3.90E-56  | 45         | 97                | AAS91583.1 |
| 57  | 2935       | 3570     | 211       |                                                                    | ORF37 [Staphylococcus phage K]                                                | 3.20E-62  | 75         | 72                | AAO47483.1 |
| 29  | 3606       | 4577     | 323       | Structural                                                         | cell surface protein precursor [LactoB. plantarum WCFS1]                      | 1.90E-21  | 36         | 44                | CAD62863.1 |
| 205 | 4663       | 5019     | 118       |                                                                    | ORF39 [Staphylococcus phage K]                                                | 5.00E-18  | 46         | 96                | AAO47486.1 |
| 121 | 5028       | 5408     | 126       |                                                                    | ORF40 [Staphylococcus phage K]                                                | 9.40E-46  | 70         | 97                | AAO47487.1 |
| 12  | 5389       | 7119     | 576       | Portal                                                             | phage portal protein, HK97 family [Wolbachia endosymbiont of D. melanogaster] | 2.90E-06  | 22         | 40                | AAS14672.1 |
| 40  | 7268       | 8053     | 261       | Capsid                                                             | major capsid protein [Staphylococcus phage Twort]                             | 6.20E-06  | 57         | 20                | AAQ62708.1 |
| 28  | 8059       | 9054     | 331       | Topoisomerase; Initiation factor; Virulence-associated; Internalin | DNA topoisomerase IV subunit A [M. penetrans HF-2]                            | 3.50E-18  | 24         | 94                | BAC44437.1 |
|     |            |          |           |                                                                    | initiation factor IF-2 [A. aeolicus VF5]                                      | 1.00E-17  | 33         | 70                | AAC07794.1 |
|     |            |          |           |                                                                    | virulent strain associated lipoprotein [B. burgdorferi]                       | 2.30E-17  | 23         | 77                | AAD09328.1 |
|     |            |          |           |                                                                    | Internalin protein [B. cereus ATCC 14579]                                     | 5.60E-16  | 29         | 75                | AAP07572.1 |
| 16  | 9146       | 10534    | 462       | Major capsid                                                       | major capsid protein [Staphylococcus phage Twort]                             | 0         | 100        | 100               | AAQ62708.1 |
| 286 | 10485      | 10619    | 44        |                                                                    |                                                                               |           |            |                   |            |
| 138 | 10621      | 10890    | 89        |                                                                    |                                                                               |           |            |                   |            |
| 32  | 10902      | 11813    | 303       |                                                                    | ORF45 [Staphylococcus phage K]                                                | 6.00E-149 | 82         | 100               | AAO47492.1 |
| 34  | 11825      | 12712    | 295       |                                                                    | ORF46 [Staphylococcus phage K]                                                | 3.00E-126 | 73         | 99                | AAO47493.1 |
| 55  | 12712      | 13356    | 214       |                                                                    | ORF47 [Staphylococcus phage K]                                                | 8.40E-66  | 57         | 96                | AAO47494.1 |
| 37  | 13387      | 14214    | 275       |                                                                    | ORF48 [Staphylococcus phage K]                                                | 2.00E-105 | 69         | 98                | AAO47495.1 |
| 185 | 14204      | 14413    | 69        |                                                                    | ORF7 [Bacteriophage A511]                                                     | 1.30E-12  | 60         | 79                | CAA62545.1 |
| 11  | 14434      | 16197    | 587       | Major tail                                                         | major tail sheath protein [Bacteriophage A511]                                | 0         | 58         | 100               | CAA62546.1 |
| 203 | 15647      | 15456    | 63        |                                                                    |                                                                               |           |            |                   |            |
| 106 | 16272      | 16637    | 121       |                                                                    | unknown [Staphylococcus phage Twort]                                          | 1.80E-60  | 99         | 95                | AAD31276.1 |
| 18  | 17654      | 18967    | 437       | Group I Intron                                                     | group I intron [Bacteriophage Tuc2009]                                        | 7.70E-06  | 30         | 32                | AAK19864.1 |
| 172 | 18363      | 18142    | 73        |                                                                    |                                                                               |           |            |                   |            |
| 245 | 19026      | 19184    | 52        |                                                                    |                                                                               |           |            |                   |            |
| 219 | 19132      | 19311    | 59        |                                                                    |                                                                               |           |            |                   |            |
| 83  | 19347      | 19802    | 151       |                                                                    | ORF51 [Staphylococcus phage K]                                                | 8.70E-31  | 44         | 98                | AAO47498.1 |
| 125 | 19849      | 20154    | 101       |                                                                    | ORF52 [Staphylococcus phage K]                                                | 3.80E-19  | 49         | 92                | AAO47499.1 |
| 229 | 20237      | 20689    | 150       |                                                                    | ORF53 [Staphylococcus phage K]                                                | 1.40E-41  | 54         | 100               | AAO47500.1 |
| 81  | 20763      | 21221    | 152       |                                                                    | ORF54 [Staphylococcus phage K]                                                | 5.20E-31  | 44         | 100               | AAO47501.1 |
| 2   | 21272      | 25081    | 1269      | Purine NTPase                                                      | purine NTPase, putative [A. fulgidus DSM 4304]                                | 2.80E-07  | 18         | 22                | AAB90211.1 |

Bacteriophage Twort (continued)

| ORF | Start (nt) | End (nt) | Size (aa) | Predicted Function                               | Representative similarity to proteins in database                                                                                                                                 | E-value                           | % Identity     | % Length of Match | Accession                              |
|-----|------------|----------|-----------|--------------------------------------------------|-----------------------------------------------------------------------------------------------------------------------------------------------------------------------------------|-----------------------------------|----------------|-------------------|----------------------------------------|
| 7   | 25129      | 27543    | 804       | Amidase; Secretory antigen                       | secretory antigen SsaA-like protein [ <i>S. epidermidis</i> ATCC 12228]<br>N-acetylmuramoyl-L-alanine amidase, family 4 [ <i>E. faecalis</i> V583]                                | 2.20E-18<br>1.80E-12              | 35<br>41       | 28<br>11          | AAO45088.1<br>AAO81590.1               |
| 87  | 25182      | 24748    | 144       |                                                  |                                                                                                                                                                                   |                                   |                |                   |                                        |
| 319 | 27431      | 27550    | 39        |                                                  |                                                                                                                                                                                   |                                   |                |                   |                                        |
| 35  | 27547      | 28413    | 288       |                                                  | ORF57 [ <i>Staphylococcus</i> phage K]                                                                                                                                            | 1.80E-41                          | 33             | 100               | AAO47506.1                             |
| 10  | 28410      | 30224    | 604       | Purine NTPase                                    | purine NTPase [ <i>M. jannaschii</i> DSM 2661]                                                                                                                                    | 8.00E-07                          | 23             | 44                | AAB99331.1                             |
| 277 | 28975      | 29115    | 46        |                                                  |                                                                                                                                                                                   |                                   |                |                   |                                        |
| 41  | 30314      | 31093    | 259       |                                                  | ORF59 [ <i>Staphylococcus</i> phage K]                                                                                                                                            | 4.40E-68                          | 50             | 100               | AAO47508.1                             |
| 72  | 31090      | 31623    | 177       |                                                  | ORF60 [ <i>Staphylococcus</i> phage K]                                                                                                                                            | 9.00E-48                          | 54             | 96                | AAO47509.1                             |
| 50  | 31613      | 32317    | 234       |                                                  | ORF61 [ <i>Staphylococcus</i> phage K]                                                                                                                                            | 2.20E-89                          | 68             | 100               | AAO47510.1                             |
| 26  | 32331      | 33377    | 348       |                                                  | ORF62 [ <i>Staphylococcus</i> phage K]                                                                                                                                            | 2.00E-129                         | 65             | 99                | AAS91584.1                             |
| 5   | 33388      | 36519    | 1043      | Anti-receptor                                    | putative anti-receptor [ <i>S. thermophilus</i> bacteriophage Sfi11]                                                                                                              | 1.30E-05                          | 30             | 16                | AAC34416.1                             |
| 381 | 33418      | 33308    | 36        |                                                  |                                                                                                                                                                                   |                                   |                |                   |                                        |
| 73  | 36604      | 37113    | 169       |                                                  | ORF64 [ <i>Staphylococcus</i> phage K]                                                                                                                                            | 3.30E-57                          | 63             | 100               | AAO47512.1                             |
| 3   | 37130      | 40585    | 1151      | Virulence-associated                             | Virulence-associated protein [ <i>B. henselae</i> str. Houston-1]                                                                                                                 | 1.30E-54                          | 23             | 96                | CAF27126.1                             |
| 232 | 40636      | 40803    | 55        |                                                  |                                                                                                                                                                                   |                                   |                |                   |                                        |
| 24  | 40803      | 41852    | 349       |                                                  | ORF66 [ <i>Staphylococcus</i> phage K]                                                                                                                                            | 9.40E-17                          | 26             | 93                | AAO47515.1                             |
| 107 | 41868      | 42233    | 121       |                                                  | ORF67 [ <i>Staphylococcus</i> phage K]                                                                                                                                            | 6.30E-13                          | 35             | 89                | AAO47516.1                             |
| 17  | 42242      | 43570    | 442       |                                                  | ORF68 [ <i>Staphylococcus</i> phage K]                                                                                                                                            | 5.20E-66                          | 35             | 100               | AAO47517.1                             |
| 6   | 43659      | 46673    | 1004      | Helicase; Gyrase; Protein splicing (intein) site | putative helicase [ <i>S. enterica</i> subsp. <i>enterica</i> serovar Typhi str. CT18]<br>DNA gyrase subunit A [ <i>M. flavescens</i> ]<br>ORF70 [ <i>Staphylococcus</i> phage K] | 2.80E-34<br>3.30E-19<br>2.00E-114 | 33<br>22<br>43 | 28<br>46<br>100   | CAD09945.1<br>CAA92433.1<br>AAO47519.1 |
| 13  | 46679      | 48166    | 495       |                                                  |                                                                                                                                                                                   |                                   |                |                   |                                        |
| 14  | 48153      | 49595    | 480       | DNA Helicase; AAA ATPase                         | DNA primase-helicase subunit [ <i>Enterobacteria</i> phage RB49]                                                                                                                  | 6.70E-14                          | 24             | 82                | AAL87839.2                             |
| 27  | 49656      | 50675    | 339       | Endonuclease; Exonuclease                        | gp47 recombination endonuclease subunit [ <i>Enterobacteria</i> phage T4]<br>putative DNA repair exonuclease [ <i>S. aureus</i> subsp. <i>aureus</i> MSSA476]                     | 2.50E-11<br>4.30E-11              | 24<br>25       | 100<br>81         | AAD42475.1<br>CAG43570.1               |
| 401 | 49807      | 49703    | 34        |                                                  |                                                                                                                                                                                   |                                   |                |                   |                                        |
| 109 | 50732      | 51094    | 120       |                                                  | ORF73 [ <i>Staphylococcus</i> phage K]                                                                                                                                            | 1.40E-23                          | 56             | 72                | AAO47522.1                             |
| 9   | 51098      | 53008    | 636       | Exonuclease; ABC transporter                     | putative exonuclease subunit 2 [ <i>Y. pestis</i> biovar <i>Medievalis</i> str. 91001]<br>ABC transporter [ <i>Y. pestis</i> KIM]<br>ORF75 [ <i>Staphylococcus</i> phage K]       | 1.10E-54<br>9.60E-51<br>2.10E-38  | 26<br>25<br>44 | 100<br>100<br>100 | AAS58684.1<br>AAC13199.1<br>AAO47524.1 |
| 65  | 53011      | 53598    | 195       |                                                  |                                                                                                                                                                                   |                                   |                |                   |                                        |
| 23  | 53611      | 54672    | 353       | DNA primase                                      | DNA primase (bacterial type) [ <i>T. tengcongensis</i> MB4]                                                                                                                       | 3.20E-12                          | 24             | 97                | AAM24950.1                             |
| 310 | 54913      | 55035    | 40        |                                                  |                                                                                                                                                                                   |                                   |                |                   |                                        |
| 89  | 55035      | 55466    | 143       |                                                  | ORF77 [ <i>Staphylococcus</i> phage K]                                                                                                                                            | 2.40E-32                          | 47             | 100               | AAO47526.1                             |

Bacteriophage Twort (continued)

| ORF | Start (nt) | End (nt) | Size (aa) | Predicted Function                         | Representative similarity to proteins in database                                         | E-value   | % Identity | % Length of Match | Accession  |
|-----|------------|----------|-----------|--------------------------------------------|-------------------------------------------------------------------------------------------|-----------|------------|-------------------|------------|
| 63  | 55456      | 56055    | 199       |                                            | ORF78 [Staphylococcus phage K]                                                            | 2.40E-77  | 65         | 100               | AAO47527.1 |
| 99  | 56071      | 56463    | 130       | Flavodoxin/nitric oxide synthase; NrdI     | NrdI protein involved in ribonucleotide reductase function [S. aureus subsp. aureus Mu50] | 2.30E-12  | 32         | 86                | BAB56892.1 |
| 45  | 56474      | 57217    | 247       | Ribonucleotide reductase large subunit     | large subunit ribonucleotide reductase [Staphylococcus phage Twort]                       | 2.00E-133 | 99         | 97                | AAM00816.1 |
| 33  | 57767      | 58669    | 300       | Ribonucleotide reductase large subunit     | large subunit ribonucleotide reductase [Staphylococcus phage Twort]                       | 2.00E-169 | 100        | 98                | AAM00816.1 |
| 52  | 58841      | 59572    | 243       | HNH endonuclease                           | HNH endonuclease I-Twol [Staphylococcus phage Twort]                                      | 4.00E-141 | 100        | 100               | AAM00817.1 |
| 371 | 59547      | 59657    | 36        |                                            |                                                                                           |           |            |                   |            |
| 118 | 59778      | 60104    | 108       | Ribonucleotide reductase alpha subunit     | large subunit ribonucleotide reductase [Staphylococcus phage Twort]                       | 2.00E-57  | 99         | 100               | AAM00816.1 |
| 25  | 60120      | 61169    | 349       | Ribonucleotide reductase beta subunit      | ribonucleoside-diphosphate reductase minor subunit [S. epidermidis ATCC 12228]            | 6.10E-93  | 53         | 92                | AAO41111.1 |
| 139 | 61182      | 61451    | 89        |                                            |                                                                                           |           |            |                   |            |
| 252 | 61234      | 61079    | 51        |                                            |                                                                                           |           |            |                   |            |
| 123 | 61453      | 61761    | 102       |                                            | ORF83 [Staphylococcus phage K]                                                            | 2.70E-33  | 62         | 100               | AAO47532.1 |
| 64  | 61841      | 62563    | 240       |                                            | ORF84 [Staphylococcus phage K]                                                            | 5.80E-85  | 74         | 82                | AAO47533.1 |
| 129 | 62563      | 62859    | 98        | Histone-like bacterial DNA-binding protein | probable DNA-binding protein HU [Pirellula sp.]                                           | 1.10E-05  | 28         | 96                | CAD73100.1 |
| 110 | 62939      | 63250    | 103       |                                            |                                                                                           |           |            |                   |            |
| 4   | 63253      | 66456    | 1067      | DNA-directed DNA polymerase                | DNA-directed DNA polymerase I [T. maritima MSB8]                                          | 2.50E-49  | 26         | 49                | AAD36686.1 |
| 186 | 66506      | 66709    | 67        |                                            |                                                                                           |           |            |                   |            |
| 77  | 66694      | 67176    | 160       |                                            | ORF91 [Staphylococcus phage K]                                                            | 7.50E-50  | 60         | 100               | AAO47540.1 |
| 22  | 67248      | 68342    | 364       |                                            | ORF92 [Staphylococcus phage K]                                                            | 1.20E-99  | 47         | 100               | AAO47541.1 |
| 155 | 68485      | 68730    | 81        |                                            |                                                                                           |           |            |                   |            |
| 19  | 68745      | 69968    | 407       | RecA bacterial DNA recombination protein   | recA-like protein [P. gingivalis]                                                         | 1.70E-23  | 27         | 74                | AAC72890.1 |
| 112 | 69961      | 70308    | 115       |                                            |                                                                                           |           |            |                   |            |
| 58  | 70301      | 70936    | 211       | RNA polymerase sigma                       | ORF94 [Staphylococcus phage K]                                                            | 5.10E-68  | 61         | 100               | AAO47543.1 |
| 58  | 70301      | 70936    | 211       | RNA polymerase sigma                       | unknown [Bacteriophage SPO1]                                                              | 9.80E-11  | 32         | 59                | CAA25950.1 |
| 407 | 70924      | 71025    | 33        |                                            |                                                                                           |           |            |                   |            |
| 56  | 71007      | 71645    | 212       |                                            | ORF95 [Staphylococcus phage K]                                                            | 6.90E-73  | 64         | 100               | AAO47544.1 |
| 178 | 72199      | 72414    | 71        | Major tail                                 | phi12 major tail protein-like protein [S. aureus bacteriophage phi 3A]                    | 7.60E-08  | 46         | 91                | AAM49601.1 |
| 131 | 72515      | 72757    | 80        |                                            |                                                                                           |           |            |                   |            |
| 47  | 72757      | 73491    | 244       |                                            | ORF97 [Staphylococcus phage K]                                                            | 1.90E-38  | 37         | 100               | AAO47546.1 |
| 20  | 73484      | 74719    | 411       | Metallophosphoesterase                     | ORF98 [Staphylococcus phage K]                                                            | 3.00E-132 | 56         | 100               | AAO47547.1 |
| 105 | 74729      | 75094    | 121       |                                            | ORF99 [Staphylococcus phage K]                                                            | 1.30E-13  | 28         | 99                | AAO47548.1 |

Bacteriophage Twort (continued)

| ORF | Start (nt) | End (nt) | Size (aa) | Predicted Function              | Representative similarity to proteins in database | E-value   | % Identity | % Length of Match | Accession  |
|-----|------------|----------|-----------|---------------------------------|---------------------------------------------------|-----------|------------|-------------------|------------|
| 71  | 75147      | 75683    | 178       |                                 |                                                   |           |            |                   |            |
| 43  | 75676      | 76422    | 248       |                                 | ORF101 [Staphylococcus phage K]                   | 2.90E-98  | 70         | 99                | AAO47550.1 |
| 93  | 76406      | 76825    | 139       |                                 | ORF102 [Staphylococcus phage K]                   | 1.30E-44  | 65         | 99                | AAO47551.1 |
| 38  | 76827      | 77633    | 268       |                                 |                                                   |           |            |                   |            |
| 48  | 77972      | 78700    | 242       |                                 | ORF103 [Staphylococcus phage K]                   | 1.60E-85  | 66         | 100               | AAO47553.1 |
| 79  | 78716      | 79180    | 154       |                                 | ORF104 [Staphylococcus phage K]                   | 1.10E-28  | 42         | 100               | AAO47554.1 |
| 88  | 79238      | 79669    | 143       |                                 | ORF105 [Staphylococcus phage K]                   | 2.00E-34  | 50         | 100               | AAO47555.1 |
| 54  | 79679      | 80353    | 224       |                                 | ORF106 [Staphylococcus phage K]                   | 3.70E-27  | 34         | 100               | AAO47556.1 |
| 96  | 80346      | 80741    | 131       |                                 | ORF107 [Staphylococcus phage K]                   | 1.10E-22  | 42         | 96                | AAO47557.1 |
| 366 | 80412      | 80299    | 37        |                                 |                                                   |           |            |                   |            |
| 157 | 80877      | 81116    | 79        |                                 |                                                   |           |            |                   |            |
| 168 | 81116      | 81340    | 74        |                                 |                                                   |           |            |                   |            |
| 237 | 81337      | 81501    | 54        |                                 |                                                   |           |            |                   |            |
| 190 | 81498      | 81704    | 68        |                                 |                                                   |           |            |                   |            |
| 21  | 81885      | 82994    | 369       | Insertion sequence; Transposase | transposase [C. tetani E88]                       | 9.00E-140 | 66         | 100               | AAO36394.1 |
| 132 | 83366      | 83644    | 92        |                                 |                                                   |           |            |                   |            |
| 67  | 83723      | 84286    | 187       |                                 |                                                   |           |            |                   |            |
| 111 | 84303      | 84659    | 118       |                                 |                                                   |           |            |                   |            |
| 195 | 84673      | 84873    | 66        |                                 |                                                   |           |            |                   |            |
| 84  | 84887      | 85339    | 150       |                                 |                                                   |           |            |                   |            |
| 102 | 85420      | 85794    | 124       |                                 |                                                   |           |            |                   |            |
| 130 | 85776      | 86069    | 97        |                                 |                                                   |           |            |                   |            |
| 82  | 86438      | 86893    | 151       |                                 |                                                   |           |            |                   |            |
| 174 | 86883      | 87095    | 70        |                                 |                                                   |           |            |                   |            |
| 117 | 87158      | 87490    | 110       |                                 |                                                   |           |            |                   |            |
| 170 | 88236      | 88508    | 90        |                                 |                                                   |           |            |                   |            |
| 44  | 88523      | 89269    | 248       |                                 | unknown [E. ictaluri]                             | 3.70E-13  | 25         | 69                | AAT77726.1 |
| 95  | 89367      | 89774    | 135       |                                 |                                                   |           |            |                   |            |
| 75  | 90005      | 90502    | 165       |                                 |                                                   |           |            |                   |            |
| 162 | 90560      | 90793    | 77        |                                 |                                                   |           |            |                   |            |
| 127 | 90817      | 91119    | 100       |                                 |                                                   |           |            |                   |            |
| 114 | 91387      | 91731    | 114       |                                 |                                                   |           |            |                   |            |
| 227 | 91768      | 91941    | 57        |                                 |                                                   |           |            |                   |            |
| 200 | 91938      | 92126    | 62        |                                 |                                                   |           |            |                   |            |

Bacteriophage Twort (continued)

| ORF | Start (nt) | End (nt) | Size (aa) | Predicted Function                            | Representative similarity to proteins in database                                       | E-value   | % Identity | % Length of Match | Accession  |
|-----|------------|----------|-----------|-----------------------------------------------|-----------------------------------------------------------------------------------------|-----------|------------|-------------------|------------|
| 179 | 92137      | 92352    | 71        |                                               |                                                                                         |           |            |                   |            |
| 175 | 92349      | 92567    | 72        |                                               |                                                                                         |           |            |                   |            |
| 206 | 92579      | 92767    | 62        |                                               |                                                                                         |           |            |                   |            |
| 30  | 92964      | 93914    | 316       |                                               |                                                                                         |           |            |                   |            |
| 137 | 94575      | 94847    | 90        |                                               |                                                                                         |           |            |                   |            |
| 197 | 95037      | 95234    | 65        |                                               |                                                                                         |           |            |                   |            |
| 94  | 95378      | 95794    | 138       |                                               |                                                                                         |           |            |                   |            |
| 113 | 96373      | 96020    | 117       |                                               |                                                                                         |           |            |                   |            |
| 408 | 96577      | 96678    | 33        |                                               |                                                                                         |           |            |                   |            |
| 192 | 96697      | 96900    | 67        |                                               |                                                                                         |           |            |                   |            |
| 253 | 96902      | 97054    | 50        |                                               |                                                                                         |           |            |                   |            |
| 173 | 97072      | 97260    | 62        |                                               |                                                                                         |           |            |                   |            |
| 62  | 98432      | 97830    | 200       |                                               | ORF2 [Staphylococcus phage K]                                                           | 1.60E-36  | 51         | 71                | AAO47448.1 |
| 148 | 98746      | 98492    | 84        |                                               |                                                                                         |           |            |                   |            |
| 171 | 99049      | 98828    | 73        |                                               |                                                                                         |           |            |                   |            |
| 104 | 99431      | 99060    | 123       |                                               |                                                                                         |           |            |                   |            |
| 8   | 101685     | 99421    | 754       | Serine/threonine-specific protein phosphatase | 2',3'-cyclic nucleotide 3'-phosphodiesterase [F. nucleatum subsp. nucleatum ATCC 25586] | 5.00E-111 | 37         | 96                | AAL93718.1 |
| 126 | 101992     | 101687   | 101       |                                               |                                                                                         |           |            |                   |            |
| 146 | 102249     | 101992   | 85        | DNA packaging                                 | unknown [Bacteriophage SPP1]                                                            | 6.10E-15  | 52         | 100               | CAA39540.1 |
| 49  | 102953     | 102246   | 235       | Serine/threonine-specific protein phosphatase | serine/threonine protein phosphatase [C. burnetii RSA 493]                              | 3.30E-16  | 30         | 95                | AAO90036.1 |
| 217 | 103259     | 103077   | 60        |                                               |                                                                                         |           |            |                   |            |
| 68  | 103824     | 103267   | 185       |                                               | ORF8 [Staphylococcus phage K]                                                           | 7.90E-29  | 42         | 100               | AAO47455.1 |
| 101 | 104270     | 103887   | 127       |                                               | ORF14 [S. thermophilus bacteriophage 7201]                                              | 3.20E-22  | 75         | 50                | AAF43507.1 |
| 86  | 104720     | 104280   | 146       |                                               |                                                                                         |           |            |                   |            |
| 53  | 105412     | 104729   | 227       |                                               |                                                                                         |           |            |                   |            |
| 166 | 105711     | 105505   | 68        |                                               |                                                                                         |           |            |                   |            |
| 159 | 105955     | 105719   | 78        |                                               |                                                                                         |           |            |                   |            |
| 85  | 106320     | 105952   | 122       | Sensor                                        | possible sensor protein [S. aureus phage phi 13]                                        | 1.20E-11  | 39         | 100               | AAL82351.1 |
| 76  | 106814     | 106317   | 165       |                                               | unknown [LactoB. bacteriophage phi adh]                                                 | 2.60E-32  | 48         | 78                | CAB52497.1 |
| 152 | 106975     | 106727   | 82        |                                               | unknown [S. pyogenes M1 GAS]                                                            | 6.60E-09  | 46         | 71                | AAK33631.1 |
| 404 | 107256     | 107152   | 34        |                                               |                                                                                         |           |            |                   |            |
| 103 | 108139     | 107765   | 124       | Staphylococcal nuclease                       | Staphylococcal nuclease family protein [L. interrogans serovar lai str. 56601]          | 1.60E-08  | 31         | 86                | AAN50918.1 |



Bacteriophage Twort (continued)

| ORF | Start (nt) | End (nt) | Size (aa) | Predicted Function                     | Representative similarity to proteins in database                                                             | E-value   | % Identity | % Length of Match | Accession  |
|-----|------------|----------|-----------|----------------------------------------|---------------------------------------------------------------------------------------------------------------|-----------|------------|-------------------|------------|
| 124 | 108488     | 108180   | 102       |                                        |                                                                                                               |           |            |                   |            |
| 300 | 108881     | 108753   | 42        |                                        |                                                                                                               |           |            |                   |            |
| 1   | 112707     | 108565   | 1380      | Structural                             | putative membrane-anchored cell surface protein [B. pseudomallei K96243]                                      | 3.40E-06  | 19         | 56                | CAH38912.1 |
| 80  | 113172     | 112708   | 154       |                                        | ORF11 [Staphylococcus phage K]                                                                                | 9.00E-31  | 44         | 98                | AAO47458.1 |
| 326 | 113360     | 113241   | 39        |                                        |                                                                                                               |           |            |                   |            |
| 120 | 113667     | 113353   | 104       |                                        |                                                                                                               |           |            |                   |            |
| 98  | 114061     | 113660   | 133       |                                        | ORF16 [Staphylococcus phage K]                                                                                | 1.10E-14  | 38         | 100               | AAO47463.1 |
| 91  | 114637     | 114212   | 141       | dUTPase                                | deoxyuridine 5-triphosphate nucleotidohydrolase [C. tetani E88]                                               | 2.40E-24  | 46         | 100               | AAO35779.1 |
| 236 | 114814     | 114647   | 55        |                                        |                                                                                                               |           |            |                   |            |
| 191 | 114957     | 114814   | 47        |                                        |                                                                                                               |           |            |                   |            |
| 150 | 115255     | 115004   | 83        |                                        |                                                                                                               |           |            |                   |            |
| 122 | 115584     | 115267   | 105       | Amidase                                | N-acetylmuramoyl-L-alanine amidase (autolysine) [OceanoB. iheyensis HTE831]                                   | 7.80E-09  | 34         | 90                | BAC12176.1 |
| 230 | 115812     | 115982   | 56        |                                        |                                                                                                               |           |            |                   |            |
| 61  | 116167     | 115550   | 205       |                                        | ORF19 [Staphylococcus phage K]                                                                                | 4.90E-60  | 59         | 92                | AAO47465.1 |
| 60  | 116787     | 116167   | 206       |                                        | ORF20 [Staphylococcus phage K]                                                                                | 2.10E-79  | 68         | 100               | AAO47467.1 |
| 78  | 117260     | 116793   | 155       |                                        | unknown [M. hyopneumoniae 232]                                                                                | 1.80E-05  | 30         | 99                | AAV27515.1 |
| 141 | 117536     | 117273   | 87        |                                        |                                                                                                               |           |            |                   |            |
| 340 | 118343     | 118459   | 38        |                                        |                                                                                                               |           |            |                   |            |
| 46  | 118344     | 117607   | 245       | PhoH ATP-dependent phosphate regulator | PhoH protein (phosphate starvation inducible protein) [L. pneumophila subsp. pneumophila str. Philadelphia 1] | 1.30E-15  | 29         | 95                | AAU28890.1 |
| 51  | 119140     | 118472   | 222       | Immunodominant antigen A               | immunodominant antigen A [S. aureus subsp. aureus MRSA252]                                                    | 1.60E-46  | 46         | 100               | CAG41627.1 |
| 70  | 119768     | 119232   | 178       |                                        | ORF23 [Staphylococcus phage K]                                                                                | 2.30E-22  | 37         | 93                | AAO47470.1 |
| 90  | 120199     | 119774   | 141       | RNase H                                | RNase HI related protein [M. maripaludis S2]                                                                  | 1.60E-20  | 42         | 92                | CAF30393.1 |
| 213 | 120381     | 120196   | 61        |                                        |                                                                                                               |           |            |                   |            |
| 66  | 120965     | 120393   | 190       | EF-hand                                | ORF25 [Staphylococcus phage K]                                                                                | 2.70E-19  | 30         | 88                | AAO47472.1 |
| 184 | 121170     | 120958   | 70        | DNA-binding; Repressor                 |                                                                                                               |           |            |                   |            |
| 134 | 121458     | 121234   | 74        |                                        |                                                                                                               |           |            |                   |            |
| 69  | 121601     | 122128   | 175       | HNH endonuclease                       | putative HNH homing endonuclease [bacteriophage bIL170]                                                       | 1.10E-10  | 33         | 65                | AAC27202.1 |
| 15  | 123559     | 122156   | 467       | Amidase                                | N-acetylmuramoyl-L-alanine amidase [Staphylococcus phage Twort]                                               | 0         | 100        | 100               | CAA69021.1 |
| 176 | 124082     | 123525   | 185       | Holin                                  | holTW [Staphylococcus phage Twort]                                                                            | 1.00E-104 | 99         | 100               | CAA69020.1 |
| 221 | 124334     | 124155   | 59        |                                        |                                                                                                               |           |            |                   |            |
| 180 | 125499     | 125284   | 71        |                                        |                                                                                                               |           |            |                   |            |
| 222 | 126037     | 125834   | 67        |                                        |                                                                                                               |           |            |                   |            |

Bacteriophage Twort (continued)

| ORF | Start (nt) | End (nt) | Size (aa) | Predicted Function | Representative similarity to proteins in database | E-value  | % Identity | % Length of Match | Accession  |
|-----|------------|----------|-----------|--------------------|---------------------------------------------------|----------|------------|-------------------|------------|
| 158 | 126722     | 126402   | 106       |                    |                                                   |          |            |                   |            |
| 149 | 127039     | 126788   | 83        |                    |                                                   |          |            |                   |            |
| 140 | 127270     | 127533   | 87        |                    |                                                   |          |            |                   |            |
| 133 | 127508     | 127786   | 92        |                    |                                                   |          |            |                   |            |
| 92  | 127779     | 128192   | 137       |                    | ORF34 [Staphylococcus phage K]                    | 1.20E-29 | 57         | 79                | AAO47481.1 |
| 151 | 128207     | 128446   | 79        | Large terminase    | large terminase [B. subtilis phage 1102phi1-3]    | 1.00E-17 | 51         | 86                | AAS45252.1 |
| 31  | 128937     | 129887   | 316       | Group I Intron     | group I intron [Bacteriophage Tuc2009]            | 1.40E-21 | 26         | 93                | AAK19864.1 |
| 59  | 129991     | 130623   | 210       | Large terminase    | large terminase [B. subtilis phage 1102phi1-3]    | 2.50E-59 | 52         | 98                | AAS45252.1 |
| 212 | 130310     | 130125   | 61        |                    |                                                   |          |            |                   |            |
